# Supplementary material for: Facile synthesis of axially chiral styrene-type carboxylic acids via palladium-catalyzed asymmetric C–H activation
Source: Royal Society of Chemistry journal article supplement (doi:10.1039/d0sc06661c), 2021-01-01
Supplement: d0sc06661c1.pdf [file d0sc06661c1.pdf]

## Supporting Information

For

### Facile Synthesis of Axially Chiral Styrene-Type Carboxyl Acid via Palladium-Catalyzed Asymmetric C-H Activation

Chi Yang, Tian-Rui Wu, Yan Li, Bing-Bing Wu, Ruo-Xing Jin, Duo-Duo Hu,

Yuan-Bo Li, Kang-Jie Bian and Xi-Sheng Wang \*

Hefei National Laboratory for Physical Sciences at the Microscale and Department of  
Chemistry, Center for Excellence in Molecular Synthesis of CAS

University of Science and Technology of China

96 Jinzhai Road, Hefei, Anhui 230026, China

### Table of Contents

|                                                                                                     |      |
|-----------------------------------------------------------------------------------------------------|------|
| 1. General Information .....                                                                        | S2   |
| 2. Tables of the Optimization of Reaction Conditions .....                                          | S3   |
| 3. Experimental Section .....                                                                       | S8   |
| 3.1 General Procedure for Synthesis of Starting Materials.....                                      | S8   |
| 3.2 General Procedure for Pd(II)-catalyzed Asymmetric C-H Arylation.....                            | S13  |
| 3.3 General Procedure for Pd(II)-catalyzed Asymmetric C-H Olefination.....                          | S26  |
| 3.4 Reduction of <b>CCA1</b> .....                                                                  | S39  |
| 3.5 Transformation of <b>5aa</b> .....                                                              | S40  |
| 3.6 Co <sup>III</sup> -catalyzed Enantioselective C(sp <sup>3</sup> )-H Amidation of Thioamide..... | S41  |
| 3.7 Co <sup>III</sup> -catalyzed Enantioselective 1,4-addition of Indoles and Maleimides.....       | S41  |
| 3.8 General Procedure for CCAs.....                                                                 | S42  |
| 4. NMR Data .....                                                                                   | S49  |
| 5. HPLC Data .....                                                                                  | S123 |

## 1. General Information:

NMR spectra were recorded on Bruker-400 MHz NMR spectrometer (400 MHz for  $^1\text{H}$  and 101 MHz for  $^{13}\text{C}$  { $^1\text{H}$ ,  $^{13}\text{C}$  decoupled}). Or Bruker-500 MHz NMR spectrometer (500 MHz for  $^1\text{H}$  and 126 MHz for  $^{13}\text{C}$  { $^1\text{H}$ ,  $^{13}\text{C}$  decoupled}).  $^1\text{H}$  NMR chemical shifts were determined relative to internal  $(\text{CH}_3)_4\text{Si}$  (TMS) at  $\delta$  0.0 or at the signal of a residual protonated solvent:  $\text{CDCl}_3$   $\delta$  7.26.  $^{13}\text{C}$  NMR chemical shifts were determined relative to  $\text{CDCl}_3$   $\delta$  77.16. Data for  $^1\text{H}$ ,  $^{13}\text{C}$  NMR are recorded as follows: chemical shift ( $\delta$ , ppm), multiplicity (s = singlet, d = doublet, t = triplet, m = multiplet, q = quartet, br = broad). High resolution mass spectra were recorded on P-SIMS-Gly of Bruker Daltonics Inc. using ESI-TOF (electrospray ionization-time of flight) or Micromass GCT using EI (electron impact). HPLC analysis was performed on Shimadzu LC-20AT. Chiral column ID, IB, IF, AD-H, AS-H, AD-3 and OD-H were purchased from Daicel Chemical Industries, LTD. Palladium acetate was purchased from Strem, and used as received. Silver carbonate, phenoborate borate alcohol ester, acrylic ester, potassium bicarbonate, p-benzoquinone, potassium hydroxide, iodomethane and N-protected amino acids were obtained from Adamas, Darui Finechemical, Energy Chemical, and Sinopharm, and used as received. Solvents were obtained from Sinopharm and Qinba Chemie, and used as received.

## 2. Tables of the Optimization of Reaction Conditions

**Table S1.** Temperature Screening of Pd catalyzed C-H arylation<sup>a,b,c</sup>

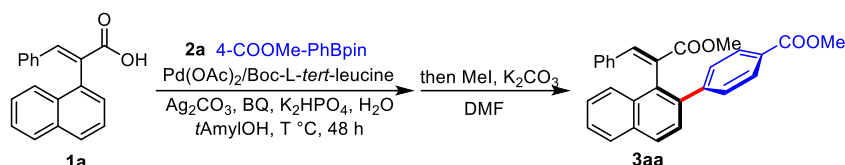

| entry | temperature | yield (%) <sup>b</sup> | ee (%) <sup>c</sup> |
|-------|-------------|------------------------|---------------------|
| 1     | 80 °C       | 80                     | 25                  |
| 2     | 60 °C       | 67                     | 74                  |
| 3     | 50 °C       | 62                     | 84                  |
| 4     | 45 °C       | 46                     | 90                  |
| 5     | 40 °C       | 43                     | 95                  |

<sup>a</sup>Unless otherwise noted, the reaction conditions were as follows: *rac*-**1a** (0.2 mmol), **2a** (2.0 equiv), Pd(OAc)<sub>2</sub> (0.1 equiv), Boc-L-*tert*-leucine (0.2 equiv), BQ (0.5 equiv), Ag<sub>2</sub>CO<sub>3</sub> (1.5 equiv), K<sub>2</sub>HPO<sub>4</sub> (2.0 equiv), H<sub>2</sub>O (20.0 equiv) in *t*AmylOH under air for 48 h. To simplify separation and HPLC analysis, the crude mixture was methylated using MeI. <sup>b</sup> isolate yields. <sup>c</sup> The ee value was determined by HPLC.

**Table S2.** Ligand screening of Pd catalyzed C-H arylation<sup>a,b,c</sup>

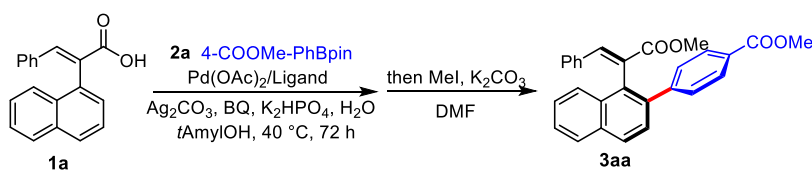

| entry | Ligand                       | yield (%) <sup>b</sup> | ee (%) <sup>c</sup> |
|-------|------------------------------|------------------------|---------------------|
| 1     | Boc-L-Alanine                | 39                     | 40                  |
| 2     | Boc-L-Phenylalanine          | 47                     | 40                  |
| 3     | Boc-L-Ser(Bn)-OH             | 19                     | 27                  |
| 4     | Boc-L-Thr- <i>t</i> Bu-OH    | 43                     | 92                  |
| 5     | Boc-L-Thr-(Bn)-OH            | 38                     | 75                  |
| 6     | Boc-L-Threonine              | 11                     | -                   |
| 7     | Boc-L-Leucine                | 20                     | 59                  |
| 8     | Boc-L-Valine                 | 56                     | 87                  |
| 9     | Boc-L- <i>tert</i> -Leucine  | 52                     | 95                  |
| 10    | Fmoc-L- <i>tert</i> -Leucine | 42                     | 92                  |
| 11    | Cbz-L- <i>tert</i> -Leucine  | 35                     | 92                  |
| 12    | <i>tert</i> -Leucine         | nr                     | -                   |

<sup>a</sup>Unless otherwise noted, the reaction conditions were as follows: *rac*-**1a** (0.2 mmol), **2a** (2.0 equiv), Pd(OAc)<sub>2</sub> (0.1 equiv), ligand (0.2 equiv), BQ (0.5 equiv), Ag<sub>2</sub>CO<sub>3</sub> (1.5 equiv), K<sub>2</sub>HPO<sub>4</sub> (2.0 equiv), H<sub>2</sub>O (20.0 equiv) in *t*AmylOH under air for 72 h. To simplify separation and HPLC analysis, the crude mixture was methylated using MeI. <sup>b</sup> isolate yields. <sup>c</sup> The ee value was determined by HPLC.

**Table S3.** Base Screening of Pd catalyzed C-H arylation <sup>a,b,c</sup>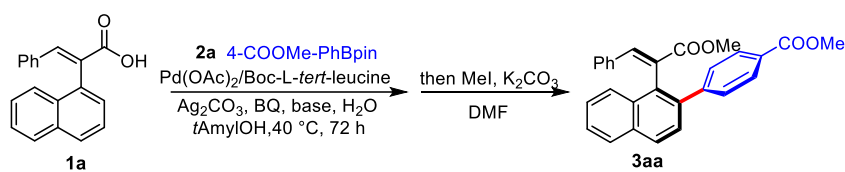

| entry | base                            | yield (%) <sup>b</sup> | ee (%) <sup>c</sup> |
|-------|---------------------------------|------------------------|---------------------|
| 1     | K <sub>3</sub> PO <sub>4</sub>  | 12                     | 97                  |
| 2     | K <sub>2</sub> HPO <sub>4</sub> | 52                     | 95                  |
| 3     | KH <sub>2</sub> PO <sub>4</sub> | 49                     | 94                  |
| 4     | KOtBu                           | 37                     | 96                  |
| 5     | KOMe                            | trace                  | -                   |
| 6     | K <sub>2</sub> CO <sub>3</sub>  | 24                     | 98                  |
| 7     | KHCO <sub>3</sub>               | 74                     | 97                  |
| 8     | KOAc                            | 44                     | 89                  |
| 9     | KOH                             | 30                     | 96                  |
| 10    | Cs <sub>2</sub> CO <sub>3</sub> | trace                  | -                   |
| 11    | Na <sub>2</sub> CO <sub>3</sub> | 54                     | 96                  |
| 12    | Li <sub>2</sub> CO <sub>3</sub> | 71                     | 93                  |
| 13    | NaHCO <sub>3</sub>              | 79                     | 78                  |

<sup>a</sup>Unless otherwise noted, the reaction conditions were as follows: *rac*-**1a** (0.2 mmol), **2a** (2.0 equiv), Pd(OAc)<sub>2</sub> (0.1 equiv), Boc-L-*tert*-leucine (0.2 equiv), BQ (0.5 equiv), Ag<sub>2</sub>CO<sub>3</sub> (1.5 equiv), base (2.0 equiv), H<sub>2</sub>O (20.0 equiv) in *t*AmylOH under air for 72 h. To simplify separation and HPLC analysis, the crude mixture was methylated using MeI. <sup>b</sup> isolate yields.

<sup>c</sup> The ee value was determined by HPLC.

**Table S4.** Solvent Screening of Pd catalyzed C-H arylation <sup>a,b,c</sup>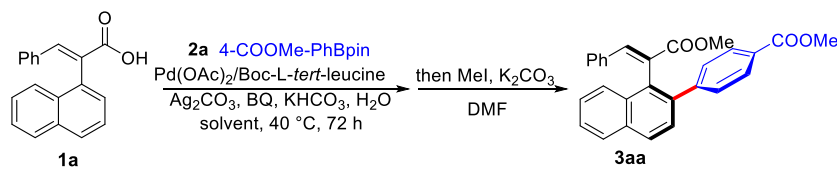

| entry           | Solvent         | yield (%) <sup>b</sup> | ee (%) <sup>c</sup> |
|-----------------|-----------------|------------------------|---------------------|
| 1               | toulene         | trace                  | -                   |
| 2               | DME             | 52                     | 95                  |
| 3               | DMF             | 71                     | 94                  |
| 4               | dioxane         | 38                     | 73                  |
| 5               | MeCN            | trace                  | -                   |
| 6               | <i>t</i> AmylOH | 74                     | 97                  |
| 7               | <i>t</i> BuOH   | 17                     | 91                  |
| 8               | <i>i</i> PrOH   | 34                     | 96                  |
| 9               | EtOH            | 28                     | 95                  |
| 10              | MeOH            | trace                  | -                   |
| 11              | HFIP            | trace                  | -                   |
| 12 <sup>d</sup> | <i>t</i> AmylOH | 41                     | 67                  |
| 13 <sup>e</sup> | <i>t</i> AmylOH | 69                     | 88                  |
| 14 <sup>f</sup> | <i>t</i> AmylOH | 52                     | 96                  |

<sup>a</sup>Unless otherwise noted, the reaction conditions were as follows: *rac*-**1a** (0.2 mmol), **2a** (2.0 equiv), Pd(OAc)<sub>2</sub> (0.1 equiv), Boc-L-*tert*-leucine (0.2 equiv), BQ (0.5 equiv), Ag<sub>2</sub>CO<sub>3</sub> (1.5 equiv), KHCO<sub>3</sub> (2.0 equiv), H<sub>2</sub>O (20.0 equiv) in solvent under air for 72 h. To simplify separation and HPLC analysis, the crude mixture was methylated using MeI. <sup>b</sup> isolate yields.

<sup>c</sup> The ee value was determined by HPLC. <sup>d</sup> no H<sub>2</sub>O. <sup>e</sup> 10 equiv H<sub>2</sub>O. <sup>f</sup> 30 equiv H<sub>2</sub>O.

**Table S5.** Oxidant Screening of Pd catalyzed C-H arylation <sup>a,b,c</sup>

| entry          | [Ag] sources                    | yield (%) <sup>b</sup> | ee (%) <sup>c</sup> |
|----------------|---------------------------------|------------------------|---------------------|
| 1              | AgOAc                           | 65                     | 91                  |
| 2              | AgNO <sub>3</sub>               | 12                     | 90                  |
| 3              | Ag <sub>2</sub> O               | 51                     | 97                  |
| 4              | AgTFA                           | 57                     | 93                  |
| 5              | AgOTf                           | trace                  | -                   |
| 6              | AgBF <sub>4</sub>               | trace                  | -                   |
| 7              | AgF                             | trace                  | -                   |
| 8 <sup>d</sup> | Ag <sub>2</sub> CO <sub>3</sub> | 51                     | 90                  |

<sup>a</sup>Unless otherwise noted, the reaction conditions were as follows: *rac*-**1a** (0.2 mmol), **2a** (2.0 equiv), Pd(OAc)<sub>2</sub> (0.1 equiv), Boc-L-*tert*-leucine (0.2 equiv), BQ (0.5 equiv), [Ag] (1.5 equiv), KHCO<sub>3</sub> (2.0 equiv), H<sub>2</sub>O (20.0 equiv) in *t*AmylOH under air for 72 h. To simplify separation and HPLC analysis, the crude mixture was methylated using MeI. <sup>b</sup> isolate yields. <sup>c</sup> The ee value was determined by HPLC. <sup>d</sup> no BQ.

**Table S6.** Ligand Screening of Pd catalyzed C-H olefination <sup>a,b,c</sup>

| Entry           | ligand                       | yield | ee   |
|-----------------|------------------------------|-------|------|
| 1               | Boc-L- <i>tert</i> -leucine  | 49 %  | 76 % |
| 2               | Ac-L-valine                  | 54%   | 64 % |
| 3               | Fmoc-L-valine                | 41%   | 71 % |
| 4               | Cbz-L-leucine                | 47%   | 76 % |
| 5 <sup>d</sup>  | Fmoc-L-isoleucine            | 24 %  | 93 % |
| 6 <sup>d</sup>  | Boc-L-isoleucine             | 39 %  | 96 % |
| 7 <sup>d</sup>  | Fmoc-L-leucine               | 31 %  | 86 % |
| 8 <sup>d</sup>  | Boc-L-isoleucine             | 44%   | 94 % |
| 9 <sup>d</sup>  | Boc-L- <i>tert</i> -leucine  | 49 %  | 96 % |
| 10 <sup>d</sup> | Boc-L-Thr(O- <i>t</i> Bu)-OH | 72 %  | 87 % |

<sup>a</sup>Unless otherwise noted, the reaction conditions were as follows: *rac*-**1a** (0.2 mmol), **4a** (3.0 equiv), Pd(OAc)<sub>2</sub> (0.1 equiv), ligand (0.3 equiv), KHCO<sub>3</sub> (2.0 equiv), in *t*AmylOH under 1 atm O<sub>2</sub> for 24 h. To simplify separation and HPLC analysis, the crude mixture was methylated using MeI. <sup>b</sup> isolate yields. <sup>c</sup> The ee value was determined by HPLC. <sup>d</sup> at 30 °C, 48 h.

**Table S7.** Solvent Screening of Pd catalyzed C-H olefination <sup>a,b,c</sup>

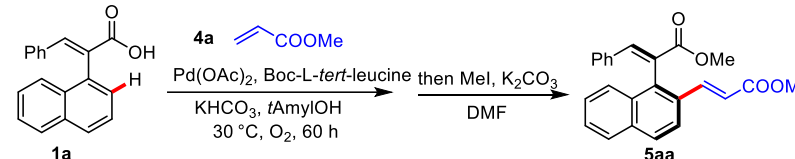

| Entry | solvent         | yield | ee   |
|-------|-----------------|-------|------|
| 1     | <i>t</i> AmylOH | 54%   | 96%  |
| 2     | <i>t</i> BuOH   | 62%   | 91 % |
| 3     | <i>i</i> PrOH   | 69%   | 96 % |
| 4     | HFIP            | 39%   | 90 % |
| 5     | EtOH            | 21%   | 91 % |
| 6     | MeOH            | 55%   | 92 % |
| 7     | toulene         | 30%   | 61%  |
| 8     | dioxane         | trace | -    |
| 9     | DCE             | trace | -    |
| 10    | DME             | trace | -    |
| 11    | DMF             | trace | -    |

<sup>a</sup>Unless otherwise noted, the reaction conditions were as follows: *rac*-**1a** (0.2 mmol), **4a** (3.0 equiv), Pd(OAc)<sub>2</sub> (0.1 equiv), Boc-L-*tert*-leucine (0.3 equiv), KHCO<sub>3</sub> (2.0 equiv), in solvent under 1 atm O<sub>2</sub> for 60 h. To simplify separation and HPLC analysis, the crude mixture was methylated using MeI. <sup>b</sup> isolate yields. <sup>c</sup> The ee value was determined by HPLC.

**Table S8.** Ligand Screening of Pd catalyzed C-H olefination <sup>a,b,c</sup>

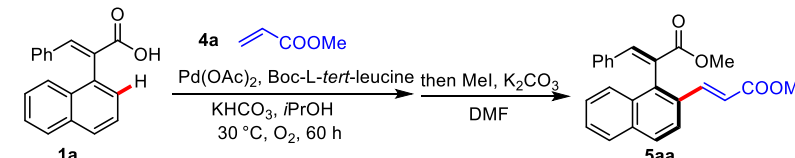

| Entry          | ligand              | yield | ee   |
|----------------|---------------------|-------|------|
| 1              | <b>L1</b> as ligand | 89 %  | 85 % |
| 2              | <b>L2</b> as ligand | nr    | -    |
| 3              | <b>L3</b> as ligand | 79 %  | 84 % |
| 4              | <b>L4</b> as ligand | 72 %  | 87 % |
| 5              | <b>L5</b> as ligand | 66 %  | 90 % |
| 6 <sup>d</sup> | <b>L5</b> as ligand | 32 %  | 90 % |
| 7              | <b>L6</b> as ligand | 80 %  | 84%  |

<sup>a</sup>Unless otherwise noted, the reaction conditions were as follows: *rac*-**1a** (0.2 mmol), **4a** (3.0 equiv), Pd(OAc)<sub>2</sub> (0.1 equiv), ligand (0.3 equiv), KHCO<sub>3</sub> (2.0 equiv), in *i*PrOH under 1 atm O<sub>2</sub> for 60 h. To simplify separation and HPLC analysis, the crude mixture was methylated using MeI. <sup>b</sup> isolate yields. <sup>c</sup> The ee value was determined by HPLC. <sup>d</sup> *t*AmylOH as solvent.

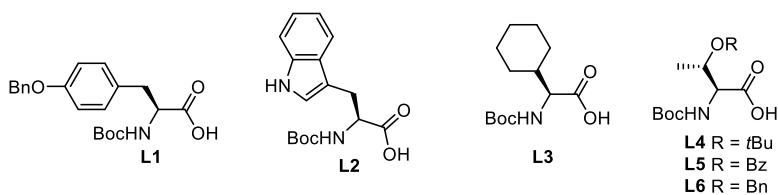

**Table S9.** Base Screening of Pd catalyzed C-H olefination <sup>a,b,c</sup>

| Entry | variations from standard conditions     | yield | ee   |
|-------|-----------------------------------------|-------|------|
| 1     | K <sub>3</sub> PO <sub>4</sub> as base  | 89%   | 91 % |
| 2     | K <sub>2</sub> HPO <sub>4</sub> as base | 52 %  | 88 % |
| 3     | KH <sub>2</sub> PO <sub>4</sub> as base | trace | -    |
| 4     | KOtBu as base                           | 38%   | 95%  |
| 5     | KOMe as base                            | 33%   | 95%  |
| 6     | K <sub>2</sub> CO <sub>3</sub> as base  | 88 %  | 94 % |
| 7     | KHCO <sub>3</sub> as base               | 75 %  | 96 % |
| 8     | KOAc as base                            | 20 %  | 89 % |
| 9     | KOH as base                             | 89 %  | 98 % |
| 10    | NaHCO <sub>3</sub> as base              | trace | -    |
| 11    | Na <sub>3</sub> PO <sub>4</sub> as base | trace | -    |
| 12    | NaOH as base                            | trace | -    |

<sup>a</sup>Unless otherwise noted, the reaction conditions were as follows: *rac*-**1a** (0.2 mmol), **4a** (3.0 equiv), Pd(OAc)<sub>2</sub> (0.1 equiv), Boc-L-*tert*-leucine (0.3 equiv), base (2.0 equiv), in *i*PrOH under 1 atm O<sub>2</sub> for 72 h. To simplify separation and HPLC analysis, the crude mixture was methylated using MeI. <sup>b</sup> isolate yields. <sup>c</sup> The ee value was determined by HPLC.

**Table S10.** Modification of the condition of Pd catalyzed C-H olefination <sup>a,b,c</sup>

| Entry | variations from standard conditions | yield | ee   |
|-------|-------------------------------------|-------|------|
| 1     | <i>n</i> PrOH as solvent            | 86 %  | 91 % |
| 2     | <i>i</i> PrOH 1 mL as solvent       | 62 %  | 93 % |
| 3     | <i>n</i> PrOH 1mL as solvent        | 68 %  | 95 % |
| 4     | KOH in 36 $\mu$ L H <sub>2</sub> O  | 97%   | 97%  |
| 5     | KOH in 72 $\mu$ L H <sub>2</sub> O  | 98 %  | 88 % |
| 6     | KOH in 108 $\mu$ L H <sub>2</sub> O | 98 %  | 88 % |

<sup>a</sup>Unless otherwise noted, the reaction conditions were as follows: *rac*-**1a** (0.2 mmol), **4a** (3.0 equiv), Pd(OAc)<sub>2</sub> (0.1 equiv), Boc-L-*tert*-leucine (0.3 equiv), KOH (2.0 equiv, presolved in 36  $\mu$ L water) in *i*PrOH 2 mL under 1 atm O<sub>2</sub> for 72 h. To simplify separation and HPLC analysis, the crude mixture was methylated using MeI. <sup>b</sup> isolate yields. <sup>c</sup> The ee value was determined by HPLC.

### 3. Experimental Section

#### 3.1 General Procedure for Synthesis of Starting Materials <sup>[1], [2]</sup>

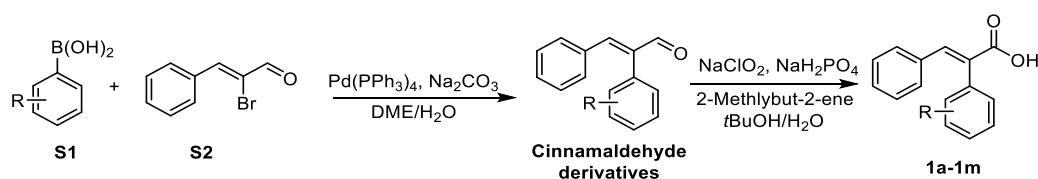

To a 100 mL dried round bottom flask was charged with **S1** (5.5 mmol, 1.1 equiv), **S2** (5 mmol, 1.0 equiv), Pd(PPh<sub>3</sub>)<sub>4</sub> (5 mol%), Na<sub>2</sub>CO<sub>3</sub> (10 mmol, 2.0 equiv), DME (30 mL), H<sub>2</sub>O (10 mL). The mixture was stirred at 110 °C overnight. After cooling to room temperature, the reaction was diluted with EtOAc, and quenched with H<sub>2</sub>O, then extracted with EtOAc for three times. The combined organic layer was collected and dried over anhydrous Na<sub>2</sub>SO<sub>4</sub>. After filtration, the solvent was then evaporated under reduced pressure and the cinnamaldehyde derivatives were obtained via flash column chromatography (petroleum ether/ethyl acetate = 20:1).

To a solution of cinnamaldehyde (4 mmol) in *t*BuOH (1.5 M) were added a solution of NaH<sub>2</sub>PO<sub>4</sub> (5.0 equiv) and NaClO<sub>2</sub> (3.7 equiv) in water, and followed by 2-methyl-2-butene (9.0 equiv). The reaction mixture was stirred at room temperature for 4 hours. After full conversion of aldehyde, monitored by TLC, saturated NH<sub>4</sub>Cl was added and the reaction mixture was extracted with EtOAc for three times. The combined organic layer was dried over anhydrous Na<sub>2</sub>SO<sub>4</sub>. After filtration, the solvent was then evaporated under reduced pressure and **1a-1m** was afford via flash column chromatography (DCM/MeOH = 100:1).

#### (E)-2-(naphthalen-1-yl)-3-phenylacrylic acid (**1a**)

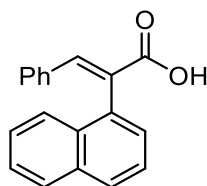

<sup>1</sup>H NMR (500 MHz, CDCl<sub>3</sub>) δ 8.18 (s, 1H), 7.89 (d, *J* = 7.9 Hz, 2H), 7.79 (d, *J* = 8.4 Hz, 1H), 7.47 (m, 2H), 7.42 (m, 1H), 7.32 (dd, *J* = 7.0, 1.0 Hz, 1H), 7.18 – 7.12 (m,



1H), 7.04 (t,  $J = 7.8$  Hz, 2H), 6.94 (d,  $J = 7.4$  Hz, 2H);  $^{13}\text{C}$  NMR (126 MHz,  $\text{CDCl}_3$ )  $\delta$  173.0, 144.1, 134.2, 133.9, 133.4, 131.9, 130.9, 129.92, 129.87, 128.8, 128.7, 128.5, 127.3, 126.7, 126.3, 125.9, 125.1. HRMS (ESI) calcd. for  $\text{C}_{19}\text{H}_{15}\text{O}_2[\text{M}+\text{H}]^+$ : 275.1072, found: 275.1074.

**(E)-3-phenyl-2-(o-tolyl) acrylic acid (1b)**

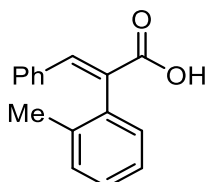

$^1\text{H}$  NMR (400 MHz,  $\text{CDCl}_3$ )  $\delta$  7.97 (s, 1H), 7.35 – 7.26 (m, 2H), 7.25 – 7.14 (m, 4H), 7.10 (d,  $J = 7.7$  Hz, 1H), 7.02 (d,  $J = 7.4$  Hz, 2H), 2.16 (s, 3H);  $^{13}\text{C}$  NMR (101 MHz,  $\text{CDCl}_3$ )  $\delta$  173.2, 142.6, 136.6, 135.1, 134.4, 130.9, 130.6, 130.4, 129.8, 129.46, 128.5, 128.4, 126.4, 19.6. HRMS (ESI) calcd. for  $\text{C}_{16}\text{H}_{15}\text{O}_2[\text{M}+\text{H}]^+$ : 239.1072, found: 239.1082.

**(E)-2-(2-ethylphenyl)-3-phenylacrylic acid (1c)**

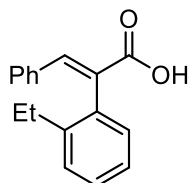

$^1\text{H}$  NMR (400 MHz,  $\text{CDCl}_3$ )  $\delta$  7.97 (s, 1H), 7.42 – 7.30 (m, 2H), 7.26 – 7.19 (m, 2H), 7.16 (t,  $J = 7.5$  Hz, 2H), 7.09 (d,  $J = 7.5$  Hz, 1H), 7.02 (d,  $J = 7.6$  Hz, 2H), 2.50 (ddq,  $J = 29.7, 14.9, 7.4$  Hz, 2H), 1.09 (t,  $J = 7.6$  Hz, 3H);  $^{13}\text{C}$  NMR (101 MHz,  $\text{CDCl}_3$ )  $\delta$  173.1, 142.6, 142.4, 134.6, 134.3, 130.9, 130.8, 129.8, 129.6, 128.6, 128.6, 128.4, 126.5, 26.2, 14.6. HRMS (ESI) calcd. for  $\text{C}_{17}\text{H}_{16}\text{O}_2\text{Na}[\text{M}+\text{Na}]^+$ : 275.1048, found: 275.1037.

**(E)-2-(2-isopropylphenyl)-3-phenylacrylic acid (1d)**

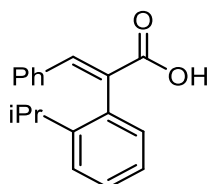

$^1\text{H}$  NMR (500 MHz,  $\text{CDCl}_3$ )  $\delta$  7.98 (s, 1H), 7.41 (d,  $J = 4.2$  Hz, 2H), 7.27 – 7.19 (m,

2H), 7.16 (t,  $J = 7.6$  Hz, 2H), 7.08 (d,  $J = 7.6$  Hz, 1H), 7.02 (d,  $J = 7.4$  Hz, 2H), 2.89 (hept,  $J = 6.8$  Hz, 1H), 1.20 (d,  $J = 6.8$  Hz, 3H), 0.97 (d,  $J = 6.8$  Hz, 3H);  $^{13}\text{C}$  NMR (126 MHz,  $\text{CDCl}_3$ )  $\delta$  173.4, 147.2, 142.7, 134.3, 133.8, 131.0, 130.9, 129.7, 129.4, 128.8, 128.3, 126.4, 126.0, 30.8, 23.9, 23.8. HRMS (ESI) calcd. for  $\text{C}_{18}\text{H}_{19}\text{O}_2[\text{M}+\text{H}]^+$ : 267.1385, found: 267.1371.

**(E)-2-(2-chlorophenyl)-3-phenylacrylic acid (1e)**

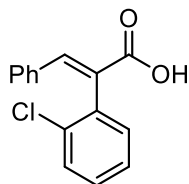

$^1\text{H}$  NMR (400 MHz,  $\text{CDCl}_3$ )  $\delta$  8.02 (s, 1H), 7.49 (dd,  $J = 8.0, 1.1$  Hz, 1H), 7.34 (td,  $J = 7.7, 1.8$  Hz, 1H), 7.29 – 7.27 (m, 1H), 7.25 – 7.23 (m, 1H), 7.22 – 7.15 (m, 3H), 7.09 – 7.03 (m, 2H);  $^{13}\text{C}$  NMR (101 MHz,  $\text{CDCl}_3$ )  $\delta$  172.0, 143.6, 134.8, 134.3, 134.0, 131.2, 130.5, 129.9, 129.8, 129.7, 129.1, 128.5, 127.3. HRMS (ESI) calcd. for  $\text{C}_{15}\text{H}_{12}\text{ClO}_2[\text{M}+\text{H}]^+$ : 259.0526, found: 259.0522.

**(E)-3-phenyl-2-(2-(trifluoromethyl)phenyl)acrylic acid (1f)**

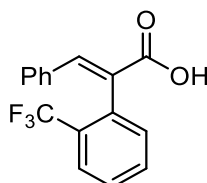

$^1\text{H}$  NMR (500 MHz,  $\text{CDCl}_3$ )  $\delta$  8.00 (s, 1H), 7.78 (d,  $J = 7.7$  Hz, 1H), 7.58 (t,  $J = 7.3$  Hz, 1H), 7.52 (t,  $J = 7.6$  Hz, 1H), 7.32 – 7.21 (m, 2H), 7.16 (t,  $J = 7.6$  Hz, 2H), 6.96 (d,  $J = 7.5$  Hz, 2H);  $^{13}\text{C}$  NMR (126 MHz,  $\text{CDCl}_3$ )  $\delta$  172.4, 143.3, 134.6, 133.7, 132.4, 131.6, 130.9, 123.0, 129.4 (q,  $J = 30.2$  Hz), 128.8, 128.5, 128.4, 126.8 (q,  $J = 4.9$  Hz), 123.9 (q,  $J = 274.3$  Hz);  $^{19}\text{F}$  NMR (471 MHz,  $\text{CDCl}_3$ )  $\delta$  -60.7; HRMS (ESI) calcd. for  $\text{C}_{16}\text{H}_{12}\text{F}_3\text{O}_2[\text{M}+\text{H}]^+$ : 293.0789, found: 293.0779.

**(E)-2-([1,1'-biphenyl]-2-yl)-3-phenylacrylic acid (1g)**

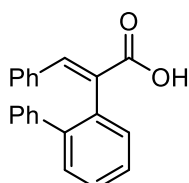

$^1\text{H}$  NMR (500 MHz,  $\text{DMSO-}d_6$ )  $\delta$  7.59 (s, 1H), 7.48 (t,  $J = 7.5$  Hz, 1H), 7.44 – 7.35 (m, 2H), 7.28 – 7.21 (m, 4H), 7.19 (t,  $J = 7.4$  Hz, 3H), 7.17 – 7.11 (m, 2H), 7.00 (d,  $J = 7.6$  Hz, 2H);  $^{13}\text{C}$  NMR (126 MHz,  $\text{DMSO-}d_6$ )  $\delta$  168.7, 141.5, 141.3, 139.8, 135.5, 134.9, 133.5, 130.7, 130.5, 129.7, 128.8, 128.6, 128.4, 128.3, 127.4. HRMS (ESI) calcd. for  $\text{C}_{21}\text{H}_{17}\text{O}_2[\text{M}+\text{H}]^+$ : 301.1229, found: 301.1238.

**(E)-2-(2-(methoxymethyl)phenyl)-3-phenylacrylic acid (1h)**

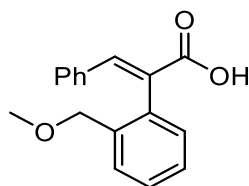

$^1\text{H}$  NMR (500 MHz,  $\text{CDCl}_3$ )  $\delta$  7.96 (s, 1H), 7.52 (d,  $J = 7.6$  Hz, 1H), 7.41 (td,  $J = 7.5$ , 1.3 Hz, 1H), 7.33 (td,  $J = 7.5$ , 1.4 Hz, 1H), 7.27 – 7.20 (m, 1H), 7.19 – 7.10 (m, 3H), 7.06 – 6.99 (m, 2H), 4.32 (dd,  $J = 86.9$ , 12.5 Hz, 2H), 3.25 (s, 3H).  $^{13}\text{C}$  NMR (126 MHz,  $\text{CDCl}_3$ )  $\delta$  173.0, 142.3, 136.7, 134.4, 134.1, 130.7, 130.1, 129.8, 129.8, 128.4, 128.2, 72.6, 58.2. HRMS (ESI) calcd. for  $\text{C}_{17}\text{H}_{16}\text{O}_3\text{Na}[\text{M}+\text{Na}]^+$ : 291.0997, found: 291.0998.

**(E)-2-(2,3-dimethylphenyl)-3-phenylacrylic acid (1i)**

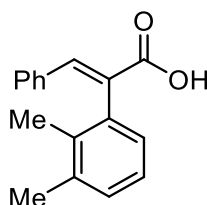

$^1\text{H}$  NMR (500 MHz,  $\text{CDCl}_3$ )  $\delta$  7.96 (s, 1H), 7.22 (d,  $J = 7.2$  Hz, 1H), 7.17 (q,  $J = 7.2$  Hz, 3H), 7.11 (t,  $J = 7.5$  Hz, 1H), 7.03 (d,  $J = 7.7$  Hz, 2H), 6.94 (d,  $J = 7.5$  Hz, 1H), 2.31 (s, 3H), 2.09 (s, 3H);  $^{13}\text{C}$  NMR (126 MHz,  $\text{CDCl}_3$ )  $\delta$  173.3, 142.3, 137.3, 135.2, 135.1, 134.5, 131.7, 130.8, 123.0, 129.7, 128.4, 127.1, 126.1, 20.6, 16.3. HRMS (ESI) calcd. for  $\text{C}_{17}\text{H}_{17}\text{O}_2[\text{M}+\text{H}]$ : 253.1229, found: 253.1230.

**(E)-2-(4-methoxy-2-methylphenyl)-3-phenylacrylic acid (1j)**

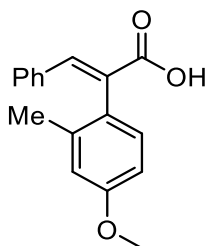

$^1\text{H}$  NMR (500 MHz,  $\text{CDCl}_3$ )  $\delta$  7.96 (s, 1H), 7.27 – 7.22 (m, 1H), 7.18 (t,  $J = 7.6$  Hz, 2H), 7.06 (d,  $J = 7.8$  Hz, 2H), 7.01 (d,  $J = 8.3$  Hz, 1H), 6.83 (d,  $J = 2.6$  Hz, 1H), 6.77 (dd,  $J = 8.4, 2.7$  Hz, 1H), 3.83 (s, 3H), 2.13 (s, 3H);  $^{13}\text{C}$  NMR (126 MHz,  $\text{CDCl}_3$ )  $\delta$  173.4, 159.5, 142.8, 138.2, 134.6, 130.63, 130.58, 129.7, 128.5, 127.3, 116.0, 111.8, 55.2, 19.9. HRMS (ESI) calcd. for  $\text{C}_{17}\text{H}_{17}\text{O}_3[\text{M}+\text{H}]^+$ : 269.1178, found: 269.1182.

**(E)-2-(4-methylnaphthalen-1-yl)-3-phenylacrylic acid (1k)**

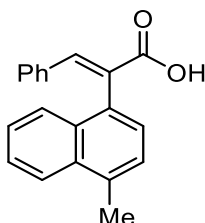

$^1\text{H}$  NMR (500 MHz,  $\text{CDCl}_3$ )  $\delta$  8.16 (s, 1H), 8.04 (d,  $J = 8.4$  Hz, 1H), 7.79 (d,  $J = 8.3$  Hz, 1H), 7.54 – 7.48 (m, 1H), 7.46 – 7.38 (m, 1H), 7.31 (d,  $J = 7.2$  Hz, 1H), 7.20 (d,  $J = 7.1$  Hz, 1H), 7.14 (t,  $J = 7.3$  Hz, 1H), 7.04 (t,  $J = 7.7$  Hz, 2H), 6.96 (d,  $J = 7.6$  Hz, 2H), 2.73 (s, 3H);  $^{13}\text{C}$  NMR (126 MHz,  $\text{CDCl}_3$ )  $\delta$  173.3, 143.8, 135.1, 134.2, 132.9, 131.8, 131.5, 130.8, 130.1, 129.7, 128.4, 126.9, 126.7, 126.2, 126.0, 125.5, 124.7, 19.7. HRMS (ESI) calcd. for  $\text{C}_{20}\text{H}_{17}\text{O}_2[\text{M}+\text{H}]^+$ : 289.1229, found: 289.1225.

**(E)-3-phenyl-2-(4-phenylnaphthalen-1-yl)acrylic acid (1l)**

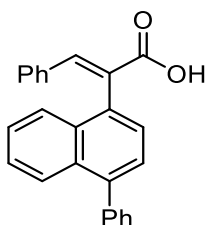

$^1\text{H}$  NMR (500 MHz,  $\text{CDCl}_3$ )  $\delta$  8.23 (s, 1H), 8.02 – 7.91 (m, 1H), 7.91 – 7.78 (m, 1H), 7.59 – 7.54 (m, 2H), 7.50 (t,  $J = 7.5$  Hz, 2H), 7.48 – 7.39 (m, 4H), 7.36 (d,  $J = 7.2$  Hz, 1H), 7.22 – 7.16 (m, 1H), 7.09 (t,  $J = 7.8$  Hz, 2H), 7.02 (d,  $J = 7.4$  Hz, 2H);  $^{13}\text{C}$  NMR

(126 MHz, CDCl<sub>3</sub>)  $\delta$  172.9, 144.1, 140.8, 140.6, 134.0, 132.8, 132.1, 131.9, 130.8, 130.2, 129.8, 129.8, 128.4, 128.3, 127.3, 126.9, 126.7, 126.7, 126.4, 126.2, 125.2. HRMS (ESI) calcd. for C<sub>25</sub>H<sub>19</sub>O<sub>2</sub>[M+H]<sup>+</sup>: 351.1385, found: 351.1375.

### (E)-3-phenyl-2-(pyren-1-yl)acrylic acid (1m)

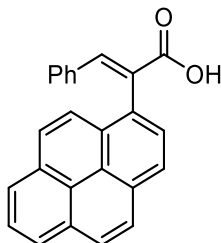

<sup>1</sup>H NMR (500 MHz, CDCl<sub>3</sub>)  $\delta$  8.30 (s, 1H), 8.22 – 8.17 (m, 2H), 8.15 (d, *J* = 7.6 Hz, 1H), 8.13 – 8.06 (m, 2H), 8.00 (m, 3H), 7.83 (d, *J* = 7.8 Hz, 1H), 7.08 (t, *J* = 7.3 Hz, 1H), 6.95 (t, *J* = 7.8 Hz, 2H), 6.87 (d, *J* = 7.6 Hz, 2H); <sup>13</sup>C NMR (126 MHz, CDCl<sub>3</sub>)  $\delta$  172.9, 144.3, 134.1, 131.4, 131.3, 131.1, 130.9, 130.5, 130.1, 129.8, 129.4, 128.4, 128.2, 127.8, 127.5, 127.4, 126.1, 125.4, 125.3, 125.3, 125.0, 124.9, 124.4. HRMS (ESI) calcd. for C<sub>25</sub>H<sub>16</sub>O<sub>2</sub>Na[M+Na]<sup>+</sup>: 371.1048, found: 371.1036.

### 3.2 General Procedure for Pd(II)-catalyzed Asymmetric C-H Arylation

A sealed tube with magnetic stir bar was charged with substrate (0.2 mmol), phenylboronic acid pinacol ester (0.4 mmol), Pd(OAc)<sub>2</sub> (10 mol%, 4.5 mg), Boc-*L*-tert-leucine (0.04 mmol, 9.2 mg), Ag<sub>2</sub>CO<sub>3</sub> (0.3 mol, 82.7 mg), BQ (0.1 mmol, 10.8 mg), KHCO<sub>3</sub> (0.4 mmol, 40 mg), H<sub>2</sub>O 72  $\mu$ L and *t*AmylOH 1 mL as solvent in air. The reaction mixture was stirred at 40 °C for 72 hours. Upon completion, the reaction was diluted with ethyl acetate, and filtered through a plug of Celite. The solvent was concentrated *in vacuo* and then the obtained slurry was dissolved in DMF (5 mL), treated with MeI (0.3 mmol, 19  $\mu$ L) and K<sub>2</sub>CO<sub>3</sub> (0.4 mmol, 55.6 mg). The reaction mixture was stirred for 2 hours at room temperature. Then the mixture was diluted with ethyl acetate 20 (mL) and washed with water. The organic layer was concentrated *in vacuo* and purified by flash chromatography (petroleum ether/ethyl acetate = 60:1 to 40:1) to afford the product.

### methyl (E)-4-(1-(3-methoxy-3-oxo-1-phenylprop-1-en-2-yl)naphthalene -2-yl)benzoate (3aa)

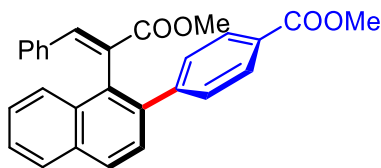

The product **3aa** was purified with silica gel chromatography (petroleum ether/ethyl acetate = 40:1) as a white solid (74% yield).  $^1\text{H}$  NMR (500 MHz,  $\text{CDCl}_3$ )  $\delta$  8.00 – 7.92 (m, 2H), 7.91 – 7.85 (m, 3H), 7.83 (d,  $J = 8.4$  Hz, 1H), 7.55 – 7.50 (m, 1H), 7.49 – 7.41 (m, 2H), 7.14 (t,  $J = 7.4$  Hz, 1H), 7.12 – 7.06 (m, 2H), 7.02 (t,  $J = 7.7$  Hz, 2H), 6.78 – 6.71 (m, 2H), 3.90 (s, 3H), 3.64 (s, 3H);  $^{13}\text{C}$  NMR (126 MHz,  $\text{CDCl}_3$ )  $\delta$  168.4, 167.1, 146.5, 143.3, 138.1, 134.4, 133.1, 131.9, 131.4, 130.2, 129.4, 129.1, 129.0, 128.8, 128.7, 128.50, 128.46, 128.3, 127.8, 127.2, 126.4, 125.4, 52.4, 52.1. HRMS (ESI) calcd. for  $\text{C}_{28}\text{H}_{23}\text{O}_4[\text{M}+\text{H}]^+$ : 423.1596, found: 423.1606.  $[\alpha]_{\text{D}}^{20} = -42.3$  ( $c = 0.25$ ,  $\text{CHCl}_3$ ), HPLC chiralcel AD-H column (10% isopropanol in hexanes, 1.0 mL/min,  $\lambda = 254$  nm),  $t_{\text{R}} = 12.8$  min (major), 10.7 min (minor), 97% ee.

**methyl (E)-2'-(3-methoxy-3-oxo-1-phenylprop-1-en-2-yl)-3'-methyl-[1,1'-biphenyl]-4-carboxylate (3ba)**

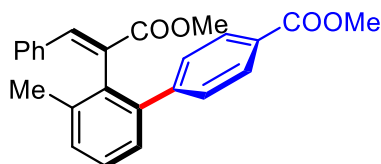

The product **3ba** was purified with silica gel chromatography (petroleum ether/ethyl acetate = 40:1) as a white solid (57% yield).  $^1\text{H}$  NMR (500 MHz,  $\text{CDCl}_3$ )  $\delta$  7.85 – 7.80 (m, 2H), 7.64 (s, 1H), 7.38 (t,  $J = 7.6$  Hz, 1H), 7.35 – 7.30 (m, 1H), 7.26 – 7.21 (m, 1H), 7.19 – 7.12 (m, 3H), 7.05 – 7.00 (m, 2H), 6.90 – 6.83 (m, 2H), 3.88 (s, 3H), 3.69 (s, 3H), 2.18 (s, 3H);  $^{13}\text{C}$  NMR (126 MHz,  $\text{CDCl}_3$ )  $\delta$  168.1, 167.1, 146.5, 141.7, 141.0, 137.2, 134.7, 134.0, 130.1, 130.0, 129.9, 129.5, 128.9, 128.6, 128.5, 128.4, 128.2, 127.7, 52.4, 52.1, 20.1. HRMS (ESI) calcd. for  $\text{C}_{25}\text{H}_{22}\text{O}_4[\text{M}+\text{Na}]^+$ : 409.1416, found: 409.1407.  $[\alpha]_{\text{D}}^{20} = -124.6$  ( $c = 0.25$ ,  $\text{CHCl}_3$ ), HPLC chiralcel AD-H column (10% isopropanol in hexanes, 1.0 mL/min,  $\lambda = 254$  nm),  $t_{\text{R}} = 9.5$  min (major), 7.2 min (minor), 94% ee.

**methyl (E)-2'-(3-methoxy-3-oxo-1-phenylprop-1-en-2-yl)-3'-methyl-[1,1'-biphenyl]-4-carboxylate (3ca)**

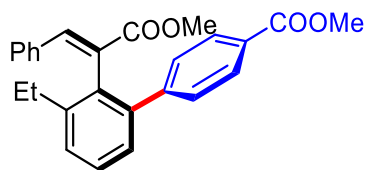

The product **3ca** was purified with silica gel chromatography (petroleum ether/ethyl acetate = 40:1) as a white solid (65% yield).  $^1\text{H}$  NMR (500 MHz,  $\text{CDCl}_3$ )  $\delta$  7.84 – 7.79 (m, 2H), 7.64 (s, 1H), 7.48 – 7.41 (m, 1H), 7.38 (dd,  $J = 7.8, 1.3$  Hz, 1H), 7.25 – 7.20 (m, 1H), 7.18 – 7.11 (m, 3H), 7.04 – 7.00 (m, 2H), 6.88 – 6.83 (m, 2H), 3.88 (s, 3H), 3.69 (s, 3H), 2.52 (ddt,  $J = 41.9, 14.8, 7.4$  Hz, 2H), 1.11 (t,  $J = 7.6$  Hz, 3H);  $^{13}\text{C}$  NMR (126 MHz,  $\text{CDCl}_3$ )  $\delta$  168.3, 167.1, 146.6, 142.9, 141.9, 140.9, 134.7, 133.4, 130.2, 129.8, 129.5, 128.9, 128.6, 128.5, 128.4, 128.3, 128.2, 127.7, 52.3, 52.1, 26.4, 14.6. HRMS (ESI) calcd. for  $\text{C}_{26}\text{H}_{24}\text{O}_4\text{Na}[\text{M}+\text{Na}]^+$ : 423.1572, found: 423.1567.  $[\alpha]_{\text{D}}^{20} = -47.6$  ( $c = 0.25$ ,  $\text{CHCl}_3$ ), HPLC chiralcel AD-H column (10% isopropanol in hexanes, 1.0 mL/min,  $\lambda = 254$  nm),  $t_{\text{R}} = 7.8$  min (major), 6.9 min (minor), 98% ee.

**methyl (E)-3'-isopropyl-2'-(3-methoxy-3-oxo-1-phenylprop-1-en-2-yl)-[1,1'-biphenyl]-4-carboxylate (3da)**

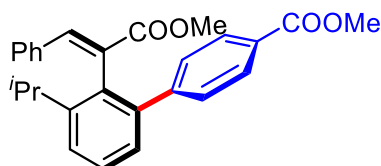

The product **3da** was purified with silica gel chromatography (petroleum ether/ethyl acetate = 40:1) as a white solid (81% yield).  $^1\text{H}$  NMR (500 MHz,  $\text{CDCl}_3$ )  $\delta$  7.83 – 7.75 (m, 2H), 7.62 (s, 1H), 7.51 – 7.41 (m, 2H), 7.23 – 7.18 (m, 1H), 7.17 – 7.10 (m, 3H), 7.06 – 6.97 (m, 2H), 6.87 – 6.78 (m, 2H), 3.87 (s, 3H), 3.71 (s, 3H), 2.92 (p,  $J = 6.8$  Hz, 1H), 1.19 (d,  $J = 6.9$  Hz, 3H), 1.02 (d,  $J = 6.8$  Hz, 3H);  $^{13}\text{C}$  NMR (126 MHz,  $\text{CDCl}_3$ )  $\delta$  168.4, 167.1, 147.8, 146.8, 141.9, 140.8, 134.7, 132.7, 130.4, 129.9, 129.5, 128.8, 128.6, 128.3, 128.3, 127.7, 125.6, 52.3, 52.1, 30.9, 24.0, 23.8. HRMS (ESI) calcd. for  $\text{C}_{27}\text{H}_{27}\text{O}_4[\text{M}+\text{H}]^+$ : 415.1909, found: 415.1906.  $[\alpha]_{\text{D}}^{20} = -77.6$  ( $c = 0.25$ ,  $\text{CHCl}_3$ ), HPLC chiralcel AD-H column (10% isopropanol in hexanes, 1.0 mL/min,  $\lambda = 254$  nm),  $t_{\text{R}} = 6.3$  min (major), 6.0 min (minor), 98% ee.

**methyl (E)-3'-chloro-2'-(3-methoxy-3-oxo-1-phenylprop-1-en-2-yl)-[1,1'-biphenyl]**

### -4-carboxylate (**3ea**)

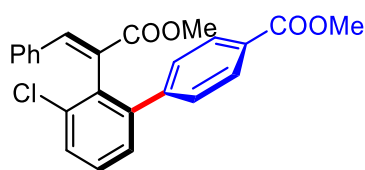

The product **3ea** was purified with silica gel chromatography (petroleum ether/ethyl acetate = 40:1) as a white solid (61% yield).  $^1\text{H}$  NMR (500 MHz,  $\text{CDCl}_3$ )  $\delta$  7.83 – 7.78 (m, 2H), 7.62 (s, 1H), 7.54 (dd,  $J = 8.1, 1.2$  Hz, 1H), 7.41 (t,  $J = 7.9$  Hz, 1H), 7.26 – 7.21 (m, 1H), 7.18 (dd,  $J = 7.6, 1.2$  Hz, 1H), 7.15 – 7.10 (m, 2H), 6.94 – 6.88 (m, 2H), 6.79 – 6.74 (m, 2H), 3.90 (s, 3H), 3.78 (s, 3H);  $^{13}\text{C}$  NMR (126 MHz,  $\text{CDCl}_3$ )  $\delta$  167.5, 166.9, 145.0, 142.9, 142.5, 135.2, 134.3, 133.6, 129.6, 129.4, 129.3, 129.1, 128.9, 128.8, 128.7, 128.5, 128.4, 128.3, 52.5, 52.1. HRMS (ESI) calcd. for  $\text{C}_{24}\text{H}_{19}\text{ClO}_4\text{Na}[\text{M}+\text{Na}]^+$ : 429.0870, found: 429.0882.  $[\alpha]_{\text{D}}^{20} = -74.6$  ( $c = 0.25$ ,  $\text{CHCl}_3$ ), HPLC chiralcel AD-H column (10% isopropanol in hexanes, 1.0 mL/min,  $\lambda = 254$  nm),  $t_{\text{R}} = 9.1$  min (major), 7.4 min (minor), 90% ee.

### methyl (E)-2'-(3-methoxy-3-oxo-1-phenylprop-1-en-2-yl)-3'-(trifluoromethyl)-[1,1'-biphenyl]-4-carboxylate (**3fa**)

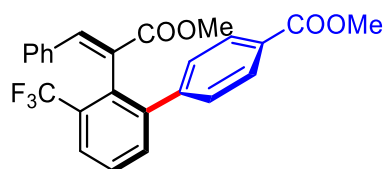

The product **3fa** was purified with silica gel chromatography (petroleum ether/ethyl acetate = 30:1) as a white solid (22% yield).  $^1\text{H}$  NMR (500 MHz,  $\text{CDCl}_3$ )  $\delta$  7.85 (dd,  $J = 8.0, 1.3$  Hz, 1H), 7.82 – 7.77 (m, 2H), 7.64 (s, 1H), 7.61 (td,  $J = 7.8, 0.9$  Hz, 1H), 7.49 (dd,  $J = 7.8, 1.3$  Hz, 1H), 7.25 – 7.22 (m, 1H), 7.15 (t,  $J = 7.8$  Hz, 2H), 7.00 – 6.91 (m, 2H), 6.77 (dd,  $J = 7.4, 1.5$  Hz, 2H), 3.89 (s, 3H), 3.73 (s, 3H);  $^{13}\text{C}$  NMR (126 MHz,  $\text{CDCl}_3$ )  $\delta$  167.5, 166.8, 144.7, 142.9, 142.7, 133.9 (q,  $J = 32.7$  Hz), 130.3, 130.0, 129.8, 129.7, 129.0, 128.9, 128.44, 128.43, 128.40, 127.4, 126.4 (q,  $J = 3.8$  Hz), 125.0, 122.8, 52.4, 52.1.  $^{19}\text{F}$  NMR (471 MHz,  $\text{CDCl}_3$ )  $\delta$  -60.4. HRMS (ESI) calcd. for  $\text{C}_{25}\text{H}_{19}\text{F}_3\text{O}_4\text{Na}[\text{M}+\text{Na}]^+$ : 463.1133, found: 463.1134.  $[\alpha]_{\text{D}}^{20} = -18.7$  ( $c = 0.25$ ,  $\text{CHCl}_3$ ), HPLC chiralcel AD-H column (10% isopropanol in hexanes, 1.0 mL/min,  $\lambda = 254$  nm),  $t_{\text{R}} = 9.3$  min (major), 7.6 min (minor), 98% ee.



**methyl (E)-2'-(3-methoxy-3-oxo-1-phenylprop-1-en-2-yl)-[1,1',3',1''-terphenyl]-4-carboxylate (3ga)**

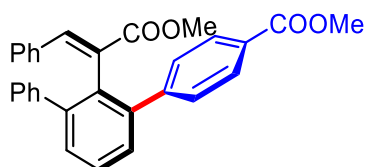

The product **3fa** was purified with silica gel chromatography (petroleum ether/ethyl acetate = 40:1) as a white solid (52% yield).  $^1\text{H}$  NMR (500 MHz,  $\text{CDCl}_3$ )  $\delta$  7.89 – 7.75 (m, 2H), 7.53 (t,  $J = 7.7$  Hz, 1H), 7.40 (dd,  $J = 7.7, 1.3$  Hz, 1H), 7.36 (s, 1H), 7.32 (dd,  $J = 7.7, 1.3$  Hz, 1H), 7.24 – 7.17 (m, 4H), 7.15 – 7.03 (m, 6H), 6.88 – 6.74 (m, 2H), 3.88 (s, 3H), 3.49 (s, 3H);  $^{13}\text{C}$  NMR (126 MHz,  $\text{CDCl}_3$ )  $\delta$  168.2, 167.1, 146.2, 142.6, 142.1, 141.3, 141.0, 134.9, 133.0, 130.5, 130.2, 129.9, 129.3, 129.2, 128.9, 128.82, 128.76, 128.44, 128.37, 128.3, 127.7, 127.0, 52.10, 52.06. HRMS (ESI) calcd. for  $\text{C}_{30}\text{H}_{25}\text{O}_4[\text{M}+\text{H}]^+$ : 449.1753, found: 449.1764.  $[\alpha]_{\text{D}}^{20} = -26.9$  ( $c = 0.25$ ,  $\text{CHCl}_3$ ), HPLC chiralcel AD-H column (10% isopropanol in hexanes, 1.0 mL/min,  $\lambda = 254$  nm),  $t_{\text{R}} = 9.0$  min (major), 8.0 min (minor), 98% ee.

**methyl (E)-2'-(3-methoxy-3-oxo-1-phenylprop-1-en-2-yl)-3',4'-dimethyl-[1,1'-biphenyl]-4-carboxylate (3ia)**

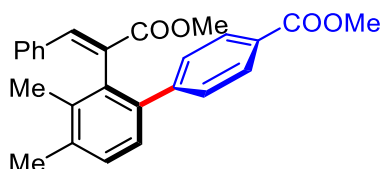

The product **3ia** was purified with silica gel chromatography (petroleum ether/ethyl acetate = 40:1) as a white solid (65% yield).  $^1\text{H}$  NMR (500 MHz,  $\text{CDCl}_3$ )  $\delta$  7.80 (d,  $J = 8.3$  Hz, 2H), 7.63 (s, 1H), 7.27 (d,  $J = 7.8$  Hz, 1H), 7.22 (t,  $J = 7.4$  Hz, 1H), 7.14 (t,  $J = 7.7$  Hz, 2H), 7.06 (d,  $J = 7.7$  Hz, 1H), 6.99 (d,  $J = 8.3$  Hz, 2H), 6.84 (d,  $J = 7.5$  Hz, 2H), 3.88 (s, 3H), 3.69 (s, 3H), 2.37 (s, 3H), 2.11 (s, 3H);  $^{13}\text{C}$  NMR (126 MHz,  $\text{CDCl}_3$ )  $\delta$  168.3, 167.2, 146.9, 141.6, 138.7, 137.0, 135.6, 134.8, 133.8, 130.8, 130.1, 129.9, 129.4, 128.9, 128.7, 128.4, 128.2, 127.3, 52.4, 52.1, 20.7, 16.4. HRMS (ESI) calcd. for  $\text{C}_{26}\text{H}_{24}\text{O}_4\text{Na}[\text{M}+\text{Na}]^+$ : 423.1572, found: 423.1564.  $[\alpha]_{\text{D}}^{20} = -36.2$  ( $c = 0.25$ ,  $\text{CHCl}_3$ ), HPLC chiralcel AD-3 column (5% isopropanol in hexanes, 0.5 mL/min,  $\lambda = 254$  nm),

$t_R = 23.0$  min (major),  $22.4$  min (minor), 98% ee.

**methyl (E)-5'-methoxy-2'-(3-methoxy-3-oxo-1-phenylprop-1-en-2-yl)-3'-methyl-[1,1'-biphenyl]-4-carboxylate (3ja)**

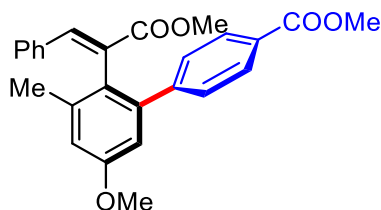

The product **3ja** was purified with silica gel chromatography (petroleum ether/ethyl acetate = 40:1) as a white solid (72% yield).  $^1\text{H}$  NMR (500 MHz,  $\text{CDCl}_3$ )  $\delta$  7.82 (d,  $J = 7.9$  Hz, 2H), 7.63 (s, 1H), 7.23 (d,  $J = 7.3$  Hz, 1H), 7.17 (t,  $J = 7.6$  Hz, 2H), 7.04 (d,  $J = 7.9$  Hz, 2H), 6.96 – 6.85 (m, 3H), 6.71 (d,  $J = 2.7$  Hz, 1H), 3.88 (s, 3H), 3.86 (s, 3H), 3.68 (s, 3H), 2.15 (s, 3H).  $^{13}\text{C}$  NMR (126 MHz,  $\text{CDCl}_3$ )  $\delta$  168.4, 167.1, 159.1, 146.4, 142.2, 141.9, 138.8, 134.9, 123.0, 129.9, 129.4, 128.9, 128.53, 128.48, 128.45, 126.3, 115.7, 113.0, 55.3, 52.3, 52.1, 20.3. HRMS (ESI) calcd. for  $\text{C}_{26}\text{H}_{24}\text{O}_5\text{Na}[\text{M}+\text{Na}]^+$ :439.1521, found: 439.1516.  $[\alpha]_D^{20} = -61.9$  ( $c = 0.25$ ,  $\text{CHCl}_3$ ), HPLC chiralcel AD-H column (10% isopropanol in hexanes, 1.0 mL/min,  $\lambda = 254$  nm),  $t_R = 14.3$  min (major), 9.0 min (minor), 91% ee.

**methyl (E)-4-(1-(3-methoxy-3-oxo-1-phenylprop-1-en-2-yl)-4-methylnaphthalen-2-yl)benzoate (3ka)**

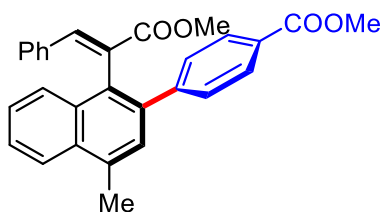

The product **3ka** was purified with silica gel chromatography (petroleum ether/ethyl acetate = 40:1) as a white solid (62% yield).  $^1\text{H}$  NMR (500 MHz,  $\text{CDCl}_3$ )  $\delta$  8.13 – 8.07 (m, 1H), 7.93 – 7.80 (m, 4H), 7.58 – 7.56 (m, 1H), 7.45 – 7.40 (m, 1H), 7.29 (s, 1H), 7.18 – 7.11 (m, 1H), 7.12 – 7.06 (m, 2H), 7.02 (t,  $J = 7.8$  Hz, 2H), 6.87 – 6.71 (m, 2H), 3.90 (s, 3H), 3.64 (s, 3H), 2.80 (s, 3H).  $^{13}\text{C}$  NMR (126 MHz,  $\text{CDCl}_3$ )  $\delta$  168.5, 167.1, 146.6, 143.2, 137.6, 135.0, 134.5, 132.3, 131.9, 130.1, 129.5, 129.3, 129.2, 128.9, 128.7, 128.6, 128.34, 128.26, 126.8, 126.2, 125.9, 124.6, 52.4, 52.1, 19.7. HRMS (ESI) calcd.

for  $C_{29}H_{24}O_4Na[M+Na]^+$ : 459.1572, found: 459.1559.  $[\alpha]_D^{20} = -42.6$  ( $c = 0.25$ ,  $CHCl_3$ ), HPLC chiralcel AD-H column (10% isopropanol in hexanes, 1.0 mL/min,  $\lambda = 254$  nm),  $t_R = 8.7$  min (major), 9.4 min (minor), 95% ee.

**methyl (E)-4-(1-(3-methoxy-3-oxo-1-phenylprop-1-en-2-yl)-4-methylnaphthalen-2-yl)benzoate (3la)**

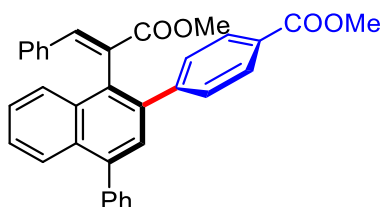

The product **3la** was purified with silica gel chromatography (petroleum ether/ethyl acetate = 40:1) as a white solid (53% yield).  $^1H$  NMR (500 MHz,  $CDCl_3$ )  $\delta$  8.06 – 8.00 (m, 1H), 7.95 – 7.88 (m, 2H), 7.88 – 7.78 (m, 2H), 7.64 – 7.58 (m, 2H), 7.56 – 7.50 (m, 2H), 7.50 – 7.43 (m, 3H), 7.40 (s, 1H), 7.22 – 7.15 (m, 1H), 7.15 – 7.11 (m, 2H), 7.06 (t,  $J = 7.8$  Hz, 2H), 6.90 – 6.78 (m, 2H), 3.90 (s, 3H), 3.69 (s, 3H).  $^{13}C$  NMR (126 MHz,  $CDCl_3$ )  $\delta$  168.4, 167.1, 146.4, 143.4, 140.8, 140.1, 137.6, 134.4, 132.3, 131.2, 130.7, 130.2, 130.1, 129.4, 129.1, 129.0, 128.8, 128.5, 128.33, 128.32, 127.6, 127.0, 126.6, 126.4, 125.7, 52.4, 52.1. HRMS (ESI) calcd. for  $C_{34}H_{27}O_4[M+H]^+$ : 499.1909, found: 499.1915.  $[\alpha]_D^{20} = -23.1$  ( $c = 0.25$ ,  $CHCl_3$ ), HPLC chiralcel AD-H column (10% isopropanol in hexanes, 1.0 mL/min,  $\lambda = 254$  nm),  $t_R = 9.7$  min (major), 15.6 min (minor), 97% ee.

**methyl (E)-4-(1-(3-methoxy-3-oxo-1-phenylprop-1-en-2-yl)pyren-2-yl)benzoate (3ma)**

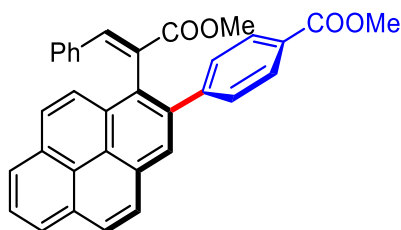

The product **3ma** was purified with silica gel chromatography (petroleum ether/ethyl acetate = 40:1) as a white solid (41% yield).  $^1H$  NMR (500 MHz,  $CDCl_3$ )  $\delta$  8.22 (dd,  $J = 7.7, 1.1$  Hz, 1H), 8.18 (dd,  $J = 7.7, 1.1$  Hz, 1H), 8.16 – 8.12 (m, 2H), 8.10 (s, 1H), 8.05 (s, 2H), 8.04 – 7.99 (m, 2H), 7.96 – 7.87 (m, 2H), 7.31 – 7.23 (m, 2H), 7.13 – 7.06

(m, 1H), 6.93 (t,  $J = 7.9$  Hz, 2H), 6.80 – 6.64 (m, 2H), 3.92 (s, 3H), 3.63 (s, 3H).  $^{13}\text{C}$  NMR (126 MHz,  $\text{CDCl}_3$ )  $\delta$  168.5, 167.2, 146.7, 143.5, 138.7, 134.5, 131.3, 131.2, 131.0, 130.3, 129.7, 129.5, 129.4, 129.3, 129.0, 128.8, 128.6, 128.4, 128.3, 127.4, 126.4, 126.3, 125.63, 125.57, 124.73, 124.68, 124.5, 52.5, 52.2. HRMS (ESI) calcd. for  $\text{C}_{34}\text{H}_{24}\text{O}_4\text{Na}[\text{M}+\text{Na}]^+$ : 519.1572, found: 519.1567.  $[\alpha]_{\text{D}}^{20} = -42.6$  ( $c = 0.25$ ,  $\text{CHCl}_3$ ), HPLC chiralcel AD-H column (10% isopropanol in hexanes, 1.0 mL/min,  $\lambda = 254$  nm),  $t_{\text{R}} = 11.5$  min (major), 18.6 min (minor), 97% ee.

### methyl (E)-3-phenyl-2-(2-phenylnaphthalen-1-yl)acrylate (3ab)

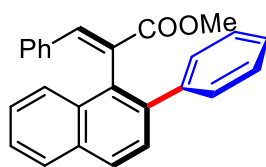

The product **3ab** was purified with silica gel chromatography (petroleum ether/ethyl acetate = 40:1) as a white solid (81% yield).  $^1\text{H}$  NMR (400 MHz,  $\text{CDCl}_3$ )  $\delta$  7.99 – 7.87 (m, 3H), 7.84 – 7.76 (m, 1H), 7.54 – 7.37 (m, 3H), 7.21 – 7.16 (m, 3H), 7.14 – 7.09 (m, 1H), 7.08 – 7.04 (m, 2H), 7.03 – 6.96 (m, 2H), 6.85 – 6.71 (m, 2H), 3.61 (s, 3H).  $^{13}\text{C}$  NMR (126 MHz,  $\text{CDCl}_3$ )  $\delta$  168.6, 142.9, 141.7, 139.2, 134.7, 132.9, 131.8, 131.3, 130.2, 129.5, 129.3, 128.7, 128.5, 128.4, 128.3, 127.7, 127.0, 126.9, 126.0, 125.4, 52.3. HRMS (ESI) calcd. for  $\text{C}_{26}\text{H}_{21}\text{O}_2[\text{M}+\text{H}]^+$ : 365.1542, found: 365.1548.  $[\alpha]_{\text{D}}^{20} = -29.7$  ( $c = 0.25$ ,  $\text{CHCl}_3$ ), HPLC chiralcel AD-H column (10% isopropanol in hexanes, 1.0 mL/min,  $\lambda = 254$  nm),  $t_{\text{R}} = 11.6$  min (major), 8.2 min (minor), 94% ee.

### methyl (E)-2-(2-(4-methoxyphenyl)naphthalen-1-yl)-3-phenylacrylate (3ac)

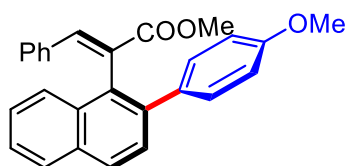

The product **3ac** was purified with silica gel chromatography (petroleum ether/ethyl acetate = 30:1) as a white solid (66% yield).  $^1\text{H}$  NMR (500 MHz,  $\text{CDCl}_3$ )  $\delta$  7.98 – 7.89 (m, 3H), 7.79 (dd,  $J = 8.4, 1.1$  Hz, 1H), 7.54 – 7.45 (m, 2H), 7.43 – 7.38 (m, 1H), 7.17 – 7.10 (m, 1H), 7.08 – 6.97 (m, 4H), 6.95 – 6.81 (m, 2H), 6.79 – 6.70 (m, 2H), 3.78 (s, 3H), 3.61 (s, 3H).  $^{13}\text{C}$  NMR (126 MHz,  $\text{CDCl}_3$ )  $\delta$  168.7, 158.5, 142.8, 138.9, 134.6,

134.1, 132.7, 131.7, 131.2, 130.3, 129.8, 129.5, 129.3, 128.6, 128.42, 128.37, 128.3, 126.9, 125.9, 125.3, 113.2, 55.2, 52.4. HRMS (ESI) calcd. for  $C_{27}H_{22}O_3Na[M+Na]^+$ : 417.1467, found: 417.1464  $[\alpha]_D^{20} = -19.9$  ( $c = 0.25$ ,  $CHCl_3$ ), HPLC chiralcel AD-H column (10% isopropanol in hexanes, 1.0 mL/min,  $\lambda = 254$  nm),  $t_R = 17.3$  min (major), 13.1 min (minor), 89% ee.

**methyl (E)-2-(2-(4-cyanophenyl)naphthalen-1-yl)-3-phenylacrylate (3ad)**

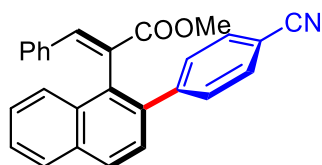

The product **3ad** was purified with silica gel chromatography (petroleum ether/ethyl acetate = 20:1) as a pale brown solid (53% yield).  $^1H$  NMR (500 MHz,  $CDCl_3$ ) 8.00 – 7.94 (m, 2H), 7.88 (s, 1H), 7.83 (d,  $J = 8.3$  Hz, 1H), 7.58 – 7.54 (m, 1H), 7.52 – 7.43 (m, 3H), 7.38 (d,  $J = 8.4$  Hz, 1H), 7.16 (t,  $J = 7.5$  Hz, 1H), 7.13 – 7.08 (m, 2H), 7.03 (t,  $J = 7.7$  Hz, 2H), 6.74 – 6.64 (m, 2H), 3.68 (s, 3H);  $^{13}C$  NMR (126 MHz,  $CDCl_3$ )  $\delta$  168.3, 146.5, 143.5, 137.1, 134.2, 133.2, 131.9, 131.5, 131.5, 130.1, 129.6, 129.5, 129.0, 128.9, 128.5, 128.4, 127.44, 127.37, 126.7, 125.4, 119.0, 110.6, 52.5. HRMS (ESI) calcd. for  $C_{27}H_{19}NO_3Na[M+Na]^+$ : 412.1313, found: 412.1309.  $[\alpha]_D^{20} = -25.5$  ( $c = 0.25$ ,  $CHCl_3$ ), HPLC chiralcel AS-H column (10% isopropanol in hexanes, 1.0 mL/min,  $\lambda = 254$  nm),  $t_R = 12.0$  min (major), 13.1 min (minor), 96% ee.

**methyl (E)-3-phenyl-2-(2-(4-(trifluoromethyl)phenyl)naphthalen-1-yl)acrylate (3ae)**

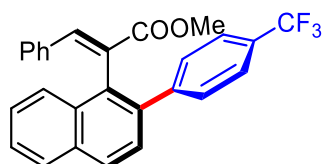

The product **3ae** was purified with silica gel chromatography (petroleum ether/ethyl acetate = 40:1) as a white solid (66% yield).  $^1H$  NMR (500 MHz,  $CDCl_3$ ) 8.01 – 7.92 (m, 2H), 7.89 (s, 1H), 7.86 – 7.79 (m, 1H), 7.56 – 7.51 m, 1H), 7.50 – 7.35 (m, 4H), 7.18 – 7.07 (m, 3H), 7.01 (t,  $J = 7.8$  Hz, 2H), 6.73 (dd,  $J = 8.3, 1.4$  Hz, 2H), 3.66 (s, 3H).  $^{13}C$  NMR (126 MHz,  $CDCl_3$ )  $\delta$  168.4, 145.4, 143.4, 137.6, 134.4, 133.1, 132.0,

131.5, 130.1, 129.4, 129.1, 129.0, 128.1, 128.8, 128.5, 128.3, 127.8, 127.3, 126.5, 125.4, 124.6 (q,  $J = 3.9$  Hz), 124.2 (q,  $J = 279.3$  Hz), 52.4;  $^{19}\text{F}$  NMR (471 MHz,  $\text{CDCl}_3$ )  $\delta$  -62.4. HRMS (ESI) calcd. for  $\text{C}_{27}\text{H}_{19}\text{F}_3\text{O}_2\text{Na}[\text{M}+\text{Na}]^+$ : 455.1235, found: 455.1227.  $[\alpha]_{\text{D}}^{20} = -5.3$  ( $c = 0.25$ ,  $\text{CHCl}_3$ ), HPLC chiralcel OD-H column (10% isopropanol in hexanes, 1.0 mL/min,  $\lambda = 254$  nm),  $t_{\text{R}} = 5.4$  min (major), 6.4 min (minor), 97% ee.

**methyl (E)-2-(2-(4-nitrophenyl)naphthalen-1-yl)-3-phenylacrylate (3af)**

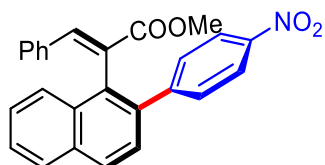

The product **3af** was purified with silica gel chromatography (petroleum ether/ethyl acetate = 40:1) as a yellow solid (56% yield).  $^1\text{H}$  NMR (400 MHz,  $\text{CDCl}_3$ )  $\delta$  8.09 – 8.01 (m, 2H), 8.02 – 7.95 (m, 2H), 7.88 (s, 1H), 7.87 – 7.81 (m, 1H), 7.56 (ddd,  $J = 8.1, 6.9, 1.3$  Hz, 1H), 7.53 – 7.47 (m, 1H), 7.40 (d,  $J = 8.4$  Hz, 1H), 7.24 – 7.11 (m, 3H), 7.03 (t,  $J = 7.8$  Hz, 2H), 6.79 – 6.66 (m, 2H), 3.69 (s, 3H);  $^{13}\text{C}$  NMR (126 MHz,  $\text{CDCl}_3$ )  $\delta$  168.3, 148.6, 146.7, 143.6, 136.8, 134.2, 133.3, 132.0, 131.6, 130.1, 129.6, 129.0, 128.6, 128.44, 128.37, 127.5, 127.3, 126.8, 125.4, 124.4, 123.0, 52.6. HRMS (ESI) calcd. for  $\text{C}_{26}\text{H}_{19}\text{NO}_4\text{Na}[\text{M}+\text{Na}]^+$ : 432.1212, found: 432.1206.  $[\alpha]_{\text{D}}^{20} = -19.9$  ( $c = 0.25$ ,  $\text{CHCl}_3$ ), HPLC chiralcel AD-H column (10% isopropanol in hexanes, 1.0 mL/min,  $\lambda = 254$  nm),  $t_{\text{R}} = 13.9$  min (major), 15.1 min (minor), 91% ee.

**methyl (E)-2-(2-([1,1'-biphenyl]-4-yl)naphthalen-1-yl)-3-phenylacrylate (3ag)**

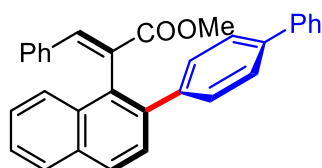

The product **3ah** was purified with silica gel chromatography (petroleum ether/ethyl acetate = 40:1) as a pale yellow solid (79% yield).  $^1\text{H}$  NMR (500 MHz,  $\text{CDCl}_3$ ) 8.00 – 7.90 (m, 3H), 7.85 – 7.81 (m, 1H), 7.64 – 7.55 (m, 2H), 7.54 – 7.46 (m, 2H), 7.47 – 7.39 (m, 5H), 7.36 – 7.28 (m, 1H), 7.18 – 7.08 (m, 3H), 7.0 – 6.99 (m, 2H), 6.92 – 6.76 (m, 2H), 3.63 (s, 3H);  $^{13}\text{C}$  NMR (126 MHz,  $\text{CDCl}_3$ )  $\delta$  168.6, 143.1, 140.8, 140.7, 139.5, 138.8, 134.7, 132.9, 131.9, 131.3, 130.2, 129.5, 129.3, 129.2, 128.8, 128.5, 128.4, 128.4,

128.3, 127.3, 127.0, 127.0, 126.4, 126.1, 125.4, 52.4. HRMS (ESI) calcd. for  $C_{32}H_{24}O_2Na[M+Na]^+$ : 463.1674, found: 463.1670.  $[\alpha]_D^{20} = -28.0$  ( $c = 0.25$ ,  $CHCl_3$ ), HPLC chiralcel OD-H column (10% isopropanol in hexanes, 1.0 mL/min,  $\lambda = 254$  nm),  $t_R = 6.7$  min (major), 8.4 min (minor), 95% ee.

**methyl (E)-2-(2-(4-fluorophenyl)naphthalen-1-yl)-3-phenylacrylate (3ah)**

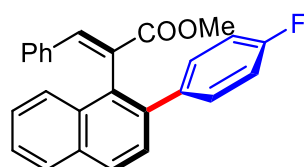

The product **3ag** was purified with silica gel chromatography (petroleum ether/ethyl acetate = 40:1) as a white solid (79% yield).  $^1H$  NMR (500 MHz,  $CDCl_3$ ) 7.97 – 7.89 (m, 3H), 7.80 (d,  $J = 8.4$  Hz, 1H), 7.54 – 7.47 (m, 1H), 7.47 – 7.38 (m, 2H), 7.20 – 7.10 (m, 1H), 7.06 – 6.95 (m, 4H), 6.94 – 6.84 (m, 2H), 6.83 – 6.71 (m, 2H), 3.64 (s, 3H);  $^{13}C$  NMR (126 MHz,  $CDCl_3$ )  $\delta$  168.49, 161.93 (d,  $J = 245.5$  Hz), 142.97, 138.08, 137.61 (d,  $J = 2.9$  Hz), 134.5, 132.9, 131.9, 131.4, 130.3, 130.2, 130.1, 129.4, 128.5, 128.4, 128.3, 128.2, 127.1, 126.1, 125.3, 114.6 (d,  $J = 21.2$  Hz), 52.4;  $^{19}F$  NMR (471 MHz,  $CDCl_3$ )  $\delta$  -115.8. HRMS (ESI) calcd. for  $C_{26}H_{19}FO_2Na[M+Na]^+$ : 405.1267, found: 405.1264.  $[\alpha]_D^{20} = -39.9$  ( $c = 0.25$ ,  $CHCl_3$ ), HPLC chiralcel AD-H column (10% isopropanol in hexanes, 1.0 mL/min,  $\lambda = 254$  nm),  $t_R = 10.3$  min (major), 7.8 min (minor), 96% ee.

**methyl (E)-2-(2-(4-bromophenyl)naphthalen-1-yl)-3-phenylacrylate (3ai)**

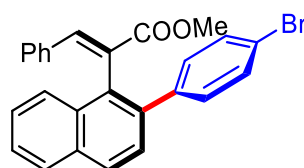

The product **3ai** was purified with silica gel chromatography (petroleum ether/ethyl acetate = 40:1) as a yellow solid (74% yield).  $^1H$  NMR (500 MHz,  $CDCl_3$ ) 7.98 – 7.92 (m, 3H), 7.82 (d,  $J = 8.4$  Hz, 1H), 7.56 – 7.50 (m, 1H), 7.46 (ddd,  $J = 8.2, 6.9, 1.3$  Hz, 1H), 7.41 (d,  $J = 8.4$  Hz, 1H), 7.36 – 7.29 (m, 2H), 7.21 – 7.10 (m, 1H), 7.03 (t,  $J = 7.8$  Hz, 2H), 6.94 – 6.84 (m, 2H), 6.78 (d,  $J = 7.4$  Hz, 2H), 3.66 (s, 3H);  $^{13}C$  NMR (126 MHz,  $CDCl_3$ )  $\delta$  168.4, 143.1, 140.6, 137.8, 134.4, 132.9, 131.9, 131.3, 130.8, 130.3,

130.1, 129.4, 129.2, 128.6, 128.4, 128.2, 127.9, 127.1, 126.2, 125.3, 121.2, 52.3. HRMS (ESI) calcd. for  $C_{26}H_{19}BrO_2Na[M+Na]^+$ : 465.0466, found: 465.0457.  $[\alpha]_D^{20} = -25.7$  ( $c = 0.25$ ,  $CHCl_3$ ), HPLC chiralcel AD-H column (10% isopropanol in hexanes, 1.0 mL/min,  $\lambda = 254$  nm),  $t_R = 8.7$  min (major), 7.8 min (minor), 94% ee.

**methyl (E)-2-(2-(3-methoxyphenyl)naphthalen-1-yl)-3-phenylacrylate (3aj)**

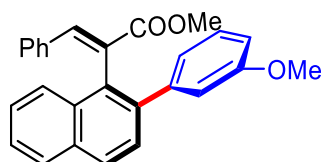

The product **3aj** was purified with silica gel chromatography (petroleum ether/ethyl acetate = 30:1) as a white solid (60% yield).  $^1H$  NMR (500 MHz,  $CDCl_3$ ) 8.01 – 7.91 (m, 3H), 7.82 (d,  $J = 8.4$  Hz, 1H), 7.63 – 7.38 (m, 3H), 7.16 – 7.09 (m, 2H), 7.02 (t,  $J = 7.7$  Hz, 2H), 6.88 – 6.72 (m, 3H), 6.68 – 6.64 (m, 1H), 6.55 (t,  $J = 2.0$  Hz, 1H), 3.64 (s, 3H), 3.57 (s, 3H);  $^{13}C$  NMR (126 MHz,  $CDCl_3$ )  $\delta$  168.6, 158.8, 143.1, 142.9, 139.0, 134.7, 132.9, 131.9, 131.2, 130.3, 129.4, 129.3, 128.8, 128.43, 128.41, 128.27, 128.25, 127.0, 126.1, 125.4, 121.1, 113.6, 113.3, 55.0, 52.4. HRMS (ESI) calcd. for  $C_{27}H_{22}O_3Na[M+Na]^+$ : 417.1467, found: 417.1462.  $[\alpha]_D^{20} = -13.3$  ( $c = 0.25$ ,  $CHCl_3$ ), HPLC chiralcel AD-H column (10% isopropanol in hexanes, 1.0 mL/min,  $\lambda = 254$  nm),  $t_R = 16.1$  min (major), 11.0 min (minor), 96% ee.

**methyl (E)-2-(2-(3-methoxyphenyl)naphthalen-1-yl)-3-phenylacrylate (3ak)**

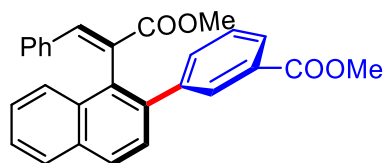

The product **3ak** was purified with silica gel chromatography (petroleum ether/ethyl acetate = 30:1) as a white solid (73% yield).  $^1H$  NMR (500 MHz,  $CDCl_3$ )  $\delta$  8.00 – 7.92 (m, 2H), 7.89 (d,  $J = 7.6$  Hz, 2H), 7.84 (dd,  $J = 8.4, 1.2$  Hz, 1H), 7.69 (t,  $J = 1.8$  Hz, 1H), 7.52 (ddd,  $J = 8.2, 6.9, 1.3$  Hz, 1H), 7.50 – 7.43 (m, 2H), 7.30 – 7.19 (m, 2H), 7.17 – 7.11 (m, 1H), 7.01 (t,  $J = 7.7$  Hz, 2H), 6.78 – 6.67 (m, 2H), 3.83 (s, 3H), 3.66 (s, 3H);  $^{13}C$  NMR (126 MHz,  $CDCl_3$ )  $\delta$  168.5, 166.9, 143.3, 141.9, 138.0, 134.4, 133.1, 133.0, 132.0, 131.5, 130.10, 130.05, 129.6, 129.4, 129.2, 128.7, 128.5, 128.3, 128.1, 128.0,



127.8, 127.2, 126.3, 125.4, 52.4, 52.1. HRMS (ESI) calcd. for  $C_{28}H_{22}O_4Na[M+Na]^+$ : 445.1416, found: 445.1410.  $[\alpha]_D^{20} = -23.6$  ( $c = 0.25$ ,  $CHCl_3$ ), HPLC chiralcel AD-H column (10% isopropanol in hexanes, 1.0 mL/min,  $\lambda = 254$  nm),  $t_R = 19.8$  min (major), 16.9 min (minor), 96% ee.

**methyl (E)-3-phenyl-2-(2-(3,4,5-trifluorophenyl)naphthalen-1-yl)acrylate (3al)**

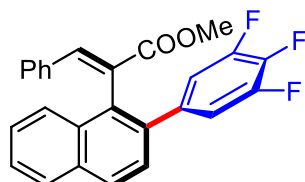

The product **3ak** was purified with silica gel chromatography (petroleum ether/ethyl acetate = 30:1) as a white solid (57% yield).  $^1H$  NMR (500 MHz,  $CDCl_3$ )  $\delta$  7.99 – 7.90 (m, 3H), 7.82 (d,  $J = 8.3$  Hz, 1H), 7.55 (t,  $J = 7.0$  Hz, 1H), 7.52 – 7.46 (m, 1H), 7.33 (d,  $J = 8.4$  Hz, 1H), 7.17 (t,  $J = 7.4$  Hz, 1H), 7.04 (t,  $J = 7.7$  Hz, 2H), 6.72 (d,  $J = 7.6$  Hz, 2H), 6.61 – 6.51 (m, 2H), 3.71 (s, 3H);  $^{13}C$  NMR (126 MHz,  $CDCl_3$ )  $\delta$  168.3, 151.4, 149.4, 143.4, 137.6, 136.0, 134.3, 133.1, 132.0, 131.6, 130.6, 129.9, 129.6, 129.3, 129.0, 128.9, 128.5, 128.4, 128.3, 127.4 (d,  $J = 8.0$  Hz), 126.7, 125.4, 112.96 (d,  $J = 5.2$  Hz), 112.83 (d,  $J = 5.0$  Hz), 52.5;  $^{19}F$  NMR (471 MHz,  $CDCl_3$ )  $\delta$  -135.1 (d,  $J = 20.7$  Hz), -162.8 (t,  $J = 20.4$  Hz). HRMS (ESI) calcd. for  $C_{26}H_{17}F_3O_2Na[M+Na]^+$ : 441.1078, found: 441.1075.  $[\alpha]_D^{20} = -44.4$  ( $c = 0.25$ ,  $CHCl_3$ ), HPLC chiralcel AD-H column (10% isopropanol in hexanes, 1.0 mL/min,  $\lambda = 254$  nm),  $t_R = 6.8$  min (major), 5.7 min (minor), 95% ee.

**methyl (E)-3-phenyl-2-(2-(3,4,5-trifluorophenyl)naphthalen-1-yl)acrylate (3am)**

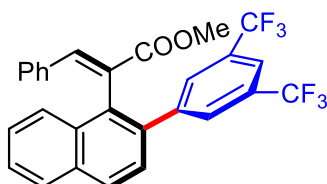

The product **3am** was purified with silica gel chromatography (petroleum ether/ethyl acetate = 30:1) as a white solid (49% yield).  $^1H$  NMR (400 MHz,  $CDCl_3$ ) 8.03 – 7.95 (m, 2H), 7.92 – 7.86 (m, 1H), 7.82 (s, 1H), 7.71 (s, 1H), 7.64 – 7.49 (m, 2H), 7.36 (d,  $J = 8.4$  Hz, 3H), 7.18 – 7.10 (m, 1H), 7.07 – 6.94 (m, 2H), 6.70 – 6.51 (m, 2H), 3.72 (s, 3H);  $^{13}C$  NMR (126 MHz,  $CDCl_3$ )  $\delta$  168.3, 143.7, 143.6, 135.9, 134.1, 133.3, 132.5,

132.1, 130.8 (q,  $J = 32.9$  Hz), 129.7, 129.6, 129.2, 129.1, 128.9, 128.6, 128.5, 128.4, 127.6, 127.1, 126.9, 125.5, 123.2 (q,  $J = 273.0$  Hz), 120.6 (sept = 4.0 Hz), 52.5.  $^{19}\text{F}$  NMR (471 MHz,  $\text{CDCl}_3$ )  $\delta$  -62.90. HRMS (ESI) calcd. for  $\text{C}_{28}\text{H}_{18}\text{F}_6\text{NaO}_2[\text{M}+\text{Na}]^+$ : 523.1109, found: 523.1107.  $[\alpha]_{\text{D}}^{20} = -36.9$  ( $c = 0.25$ ,  $\text{CHCl}_3$ ), HPLC chiralcel AD-H column (10% isopropanol in hexanes, 1.0 mL/min,  $\lambda = 254$  nm),  $t_{\text{R}} = 4.4$  min (major), 4.0 min (minor), 94% ee.

### methyl (E)-3-phenyl-2-(2-(3,4,5-trifluorophenyl)naphthalen-1-yl)acrylate (3an)

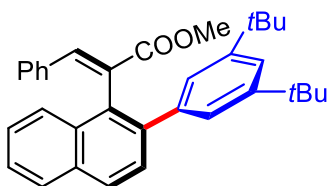

The product **3an** was purified with silica gel chromatography (petroleum ether/ethyl acetate = 30:1) as a white solid (41% yield).  $^1\text{H}$  NMR (500 MHz,  $\text{CDCl}_3$ )  $\delta$  7.95 (dd,  $J = 11.6, 8.4$  Hz, 2H), 7.87 – 7.79 (m, 2H), 7.57 – 7.48 (m, 2H), 7.47 – 7.40 (m, 1H), 7.25 – 7.24 (m, 1H), 7.15 – 7.07 (m, 1H), 7.00 (t,  $J = 7.7$  Hz, 2H), 6.89 (t,  $J = 1.7$  Hz, 2H), 6.75 (d,  $J = 8.0$  Hz, 2H), 3.65 (d,  $J = 1.0$  Hz, 3H), 1.17 (d,  $J = 1.6$  Hz, 18H);  $^{13}\text{C}$  NMR (126 MHz,  $\text{CDCl}_3$ )  $\delta$  168.6, 149.8, 142.6, 140.7, 140.3, 134.7, 132.8, 132.1, 131.3, 130.2, 129.8, 129.2, 128.42, 128.35, 128.29, 128.2, 126.8, 125.8, 125.4, 123.1, 120.5, 52.2, 34.7, 31.3. HRMS (ESI) calcd. for  $\text{C}_{34}\text{H}_{36}\text{NaO}_2[\text{M}+\text{Na}]^+$ : 499.2613, found: 499.2619.  $[\alpha]_{\text{D}}^{20} = -59.5$  ( $c = 0.25$ ,  $\text{CHCl}_3$ ), HPLC chiralcel AD-H column (10% isopropanol in hexanes, 1.0 mL/min,  $\lambda = 254$  nm),  $t_{\text{R}} = 4.7$  min (major), 4.1 min (minor), 97% ee.

### 3.3 General Procedure for Pd(II)-catalyzed Asymmetric C-H olefination

Substrate (0.2 mmol),  $\text{Pd}(\text{OAc})_2$  (10 mol%, 4.5 mg), Boc-L-*tert*-leucine (0.06 mmol, 13.9 mg) were placed in a Schlenk tube, which was filled with oxygen by using standard Schlenk techniques. After which, *i*PrOH (2 mL) was added using a syringe. Olefin (0.6 mmol) and a solution of KOH (22.4 mg in 36  $\mu\text{L}$   $\text{H}_2\text{O}$ ) was added via microsyringe, subsequently. The reaction mixture was vigorously stirred at 30  $^\circ\text{C}$  for 72 hours. Upon completion, the reaction was diluted with ethyl acetate, and filtered through a plug of Celite. The solvent was concentrated *in vacuo* and then the obtained

slurry was dissolved in DMF (5 mL), treated with MeI (0.3 mmol, 19  $\mu$ L) and  $K_2CO_3$  (0.4 mmol, 55.6 mg). The reaction mixture was stirred for another 2 hours at room temperature. Then the mixture was diluted with ethyl acetate 20 mL and washed with water. Organic layer was concentrated *in vacuo* and purified by flash chromatography (petroleum ether/ethyl acetate = 30:1 to 10:1) to afford the product.

**methyl (E)-2-(2-((E)-3-methoxy-3-oxoprop-1-en-1-yl)naphthalen-1-yl)-3-phenylacrylate (5aa)**

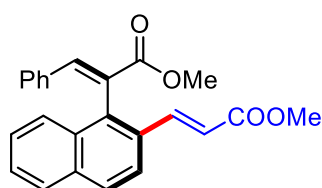

The product **5aa** was purified with silica gel chromatography (petroleum ether/ethyl acetate = 10:1) as a white solid (97% yield).  $^1H$  NMR (400 MHz,  $CDCl_3$ )  $\delta$  8.29 (s, 1H), 7.96 – 7.68 (m, 5H), 7.49 (ddd,  $J$  = 8.1, 6.9, 1.2 Hz, 1H), 7.41 (ddd,  $J$  = 8.3, 6.9, 1.3 Hz, 1H), 7.16 – 7.07 (m, 1H), 7.05 – 6.99 (m, 2H), 6.94 – 6.78 (m, 2H), 6.41 (d,  $J$  = 15.9 Hz, 1H), 3.72 (s, 3H), 3.68 (s, 3H);  $^{13}C$  NMR (101 MHz,  $CDCl_3$ )  $\delta$  167.9, 167.2, 143.9, 142.2, 135.1, 134.2, 133.9, 131.8, 130.4, 130.4, 129.7, 128.9, 128.5, 128.4, 127.4, 127.31, 127.30, 125.7, 123.1, 119.6, 52.6, 51.7. HRMS (ESI) calcd. for  $C_{24}H_{20}O_4Na[M+Na]^+$ : 395.1259, found: 395.1264.  $[\alpha]_D^{20}$  = -51.9 ( $c$  = 0.25,  $CHCl_3$ ), HPLC chiralcel AD-H column (10% isopropanol in hexanes, 1.0 mL/min,  $\lambda$  = 254 nm),  $t_R$  = 24.9 min (major), 23.1 min (minor), 97% ee.

**methyl (E)-2-(2-((E)-3-methoxy-3-oxoprop-1-en-1-yl)naphthalen-1-yl)-3-phenylacrylate (5ba)**

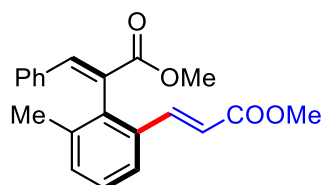

The product **5ba** was purified with silica gel chromatography (petroleum ether/ethyl acetate = 10:1) as a white solid (68% yield).  $^1H$  NMR (500 MHz,  $CDCl_3$ )  $\delta$  8.03 (s, 1H), 7.64 (d,  $J$  = 15.9 Hz, 1H), 7.54 (d,  $J$  = 7.3 Hz, 1H), 7.32 (dt,  $J$  = 13.7, 7.2 Hz, 2H), 7.21 (t,  $J$  = 7.4 Hz, 1H), 7.14 (t,  $J$  = 7.6 Hz, 2H), 7.01 – 6.87 (m, 2H), 6.28 (d,  $J$  = 15.9 Hz,

1H), 3.76 (s, 3H), 3.70 (s, 3H), 2.10 (s, 3H); <sup>13</sup>C NMR (126 MHz, CDCl<sub>3</sub>) δ 167.7, 167.1, 142.7, 142.3, 137.3, 136.3, 134.2, 133.5, 132.1, 130.1, 129.7, 128.6, 128.5, 128.4, 124.31, 119.4, 52.6, 51.60, 19.9. HRMS (ESI) calcd. for C<sub>21</sub>H<sub>20</sub>O<sub>4</sub>Na[M+Na]<sup>+</sup>: 359.1259, found: 359.1253. [α]<sub>D</sub><sup>20</sup> = -25.8 (c = 0.25, CHCl<sub>3</sub>), HPLC chiralcel AD-H column (10% isopropanol in hexanes, 1.0 mL/min, λ = 254 nm), t<sub>R</sub> = 9.8 min (major), 13.4 min (minor), 90% ee.

**methyl (E)-2-(2-ethyl-6-((E)-3-methoxy-3-oxoprop-1-en-1-yl)phenyl)-3-phenylacrylate (5ca)**

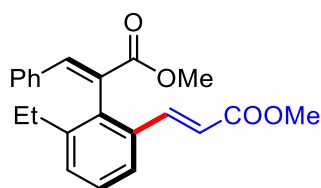

The product **5ca** was purified with silica gel chromatography (petroleum ether/ethyl acetate = 10:1) as a white solid (99% yield). <sup>1</sup>H NMR (500 MHz, CDCl<sub>3</sub>) δ 8.03 (s, 1H), 7.64 (d, *J* = 15.9 Hz, 1H), 7.59 – 7.48 (m, 1H), 7.46 – 7.33 (m, 2H), 7.24 – 7.17 (m, 1H), 7.13 (t, *J* = 7.6 Hz, 2H), 7.07 – 6.79 (m, 2H), 6.27 (d, *J* = 15.9 Hz, 1H), 3.75 (s, 3H), 3.70 (s, 3H), 2.45 (ddt, *J* = 40.7, 14.8, 7.4 Hz, 2H), 1.03 (t, *J* = 7.6 Hz, 3H); <sup>13</sup>C NMR (126 MHz, CDCl<sub>3</sub>) δ 168.0, 167.1, 143.0, 142.8, 142.5, 135.7, 134.2, 133.6, 130.37, 130.35, 129.7, 128.6, 128.5, 128.3, 124.3, 119.4, 52.6, 51.6, 26.3, 14.4. HRMS (ESI) calcd. for C<sub>22</sub>H<sub>22</sub>O<sub>4</sub>Na[M+Na]<sup>+</sup>: 373.1416, found: 373.1413. [α]<sub>D</sub><sup>20</sup> = -51.8 (c = 0.25, CHCl<sub>3</sub>), HPLC chiralcel AD-H column (10% isopropanol in hexanes, 1.0 mL/min, λ = 254 nm), t<sub>R</sub> = 8.7 min (major), 12.1 min (minor), 98% ee.

**methyl (E)-2-(2-isopropyl-6-((E)-3-methoxy-3-oxoprop-1-en-1-yl)phenyl)-3-phenylacrylate (5da)**

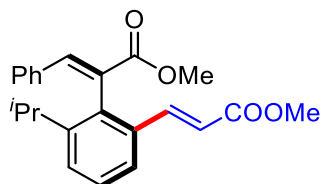

The product **5da** was purified with silica gel chromatography (petroleum ether/ethyl acetate = 10:1) as a white solid (99% yield). <sup>1</sup>H NMR (500 MHz, CDCl<sub>3</sub>) δ 8.04 (s, 1H), 7.65 (d, *J* = 15.8 Hz, 1H), 7.54 (m, *J* = 5.5, 3.5 Hz, 1H), 7.47 – 7.41 (m, 2H), 7.22 –

7.17 (m, 1H), 7.13 (t,  $J = 7.6$  Hz, 2H), 6.93 (d,  $J = 7.6$  Hz, 2H), 6.25 (d,  $J = 15.8$  Hz, 1H), 3.75 (s, 3H), 3.70 (s, 3H), 2.88 (hept,  $J = 6.9$  Hz, 1H), 1.13 (d,  $J = 6.8$  Hz, 3H), 0.92 (d,  $J = 6.8$  Hz, 3H);  $^{13}\text{C}$  NMR (126 MHz,  $\text{CDCl}_3$ )  $\delta$  168.0, 167.1, 147.8, 143.0, 142.6, 134.8, 134.2, 133.4, 130.5, 129.7, 128.8, 128.4, 128.3, 127.8, 124.3, 119.4, 52.5, 51.6, 30.7, 23.7. HRMS (ESI) calcd. for  $\text{C}_{23}\text{H}_{25}\text{O}_4[\text{M}+\text{H}]^+$ : 365.1753, found: 365.1739.  $[\alpha]_{\text{D}}^{20} = -81.1$  ( $c = 0.25$ ,  $\text{CHCl}_3$ ), HPLC chiralcel AD-H column (10% isopropanol in hexanes, 1.0 mL/min,  $\lambda = 254$  nm),  $t_{\text{R}} = 6.6$  min (major), 10.1 min (minor), >99% ee.

**methyl (E)-2-(2-chloro-6-((E)-3-methoxy-3-oxoprop-1-en-1-yl)phenyl)-3-phenylacrylate (5ea)**

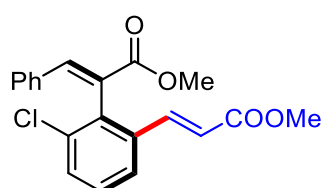

The product **5ea** was purified with silica gel chromatography (petroleum ether/ethyl acetate = 10:1) as a white solid (55% yield).  $^1\text{H}$  NMR (500 MHz,  $\text{CDCl}_3$ )  $\delta$  8.07 (s, 1H), 7.59 – 7.47 (m, 3H), 7.40 – 7.33 (m, 1H), 7.25 – 7.20 (m, 1H), 7.15 (t,  $J = 7.5$  Hz, 2H), 7.00 – 6.92 (m, 2H), 6.20 (d,  $J = 15.9$  Hz, 1H), 3.78 (d,  $J = 1.0$  Hz, 3H), 3.70 (d,  $J = 1.2$  Hz, 3H);  $^{13}\text{C}$  NMR (126 MHz,  $\text{CDCl}_3$ )  $\delta$  166.9, 166.7, 143.5, 141.5, 135.6, 135.4, 135.2, 133.9, 130.9, 130.0, 129.8, 129.5, 128.6, 127.0, 125.1, 120.7, 52.7, 51.7. HRMS (ESI) calcd. for  $\text{C}_{20}\text{H}_{17}\text{ClO}_4\text{Na}[\text{M}+\text{Na}]^+$ : 379.0713, found: 379.0712.  $[\alpha]_{\text{D}}^{20} = -21.6$  ( $c = 0.25$ ,  $\text{CHCl}_3$ ), HPLC chiralcel AD-H column (10% isopropanol in hexanes, 1.0 mL/min,  $\lambda = 254$  nm),  $t_{\text{R}} = 7.2$  min (major), 6.5 min (minor), 97% ee.

**methyl (E)-2-(2-((E)-3-methoxy-3-oxoprop-1-en-1-yl)-6-(trifluoromethyl)phenyl)-3-phenylacrylate (5fa)**

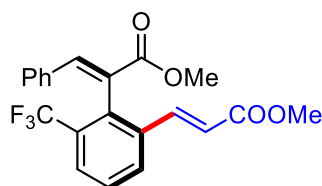

The product **5fa** was purified with silica gel chromatography (petroleum ether/ethyl acetate = 10:1) as a white solid (47% yield).  $^1\text{H}$  NMR (500 MHz,  $\text{CDCl}_3$ )  $\delta$  8.07 (s, 1H), 7.87 (d,  $J = 7.9$  Hz, 1H), 7.80 (d,  $J = 7.8$  Hz, 1H), 7.63 (d,  $J = 15.9$  Hz, 1H), 7.57 (t,  $J = 7.5$  Hz, 2H), 7.40 – 7.33 (m, 1H), 7.25 – 7.20 (m, 1H), 7.15 (t,  $J = 7.5$  Hz, 2H), 7.00 – 6.92 (m, 2H), 6.20 (d,  $J = 15.9$  Hz, 1H), 3.78 (d,  $J = 1.0$  Hz, 3H), 3.70 (d,  $J = 1.2$  Hz, 3H);  $^{13}\text{C}$  NMR (126 MHz,  $\text{CDCl}_3$ )  $\delta$  166.9, 166.7, 143.5, 141.5, 135.6, 135.4, 135.2, 133.9, 130.9, 130.0, 129.8, 129.5, 128.6, 127.0, 125.1, 120.7, 52.7, 51.7. HRMS (ESI) calcd. for  $\text{C}_{21}\text{H}_{17}\text{F}_3\text{O}_4\text{Na}[\text{M}+\text{Na}]^+$ : 393.0713, found: 393.0712.  $[\alpha]_{\text{D}}^{20} = -21.6$  ( $c = 0.25$ ,  $\text{CHCl}_3$ ), HPLC chiralcel AD-H column (10% isopropanol in hexanes, 1.0 mL/min,  $\lambda = 254$  nm),  $t_{\text{R}} = 7.2$  min (major), 6.5 min (minor), 97% ee.

= 7.9 Hz, 1H), 7.22 (t,  $J = 7.4$  Hz, 1H), 7.14 (t,  $J = 7.7$  Hz, 2H), 6.88 (d,  $J = 7.5$  Hz, 2H), 6.31 (d,  $J = 15.9$  Hz, 1H), 3.75 (s, 3H), 3.71 (s, 3H);  $^{13}\text{C}$  NMR (126 MHz,  $\text{CDCl}_3$ )  $\delta$  167.1, 166.5, 143.6, 140.8, 135.7, 135.2, 133.7, 130.4, 130.2, 130.1, 130.0, 128.7, 128.6, 128.1 (q,  $J = 5.3$  Hz), 125.8, 124.7, 123.6 (q,  $J = 274.2$  Hz), 121.5, 52.6, 51.8.  $^{19}\text{F}$  NMR (471 MHz,  $\text{CDCl}_3$ )  $\delta$  -60.9. HRMS (ESI) calcd. for  $\text{C}_{21}\text{H}_{17}\text{F}_3\text{O}_2\text{Na}[\text{M}+\text{Na}]^+$ : 413.0977, found: 413.0976.  $[\alpha]_{\text{D}}^{20} = -30.5$  ( $c = 0.25$ ,  $\text{CHCl}_3$ ), HPLC chiralcel AD-H column (10% isopropanol in hexanes, 1.0 mL/min,  $\lambda = 254$  nm),  $t_{\text{R}} = 10.9$  min (major), 14.3 min (minor), >99% ee.

**methyl (E)-2-(3-((E)-3-methoxy-3-oxoprop-1-en-1-yl)-[1,1'-biphenyl]-2-yl)-3-phenylacrylate (5ga)**

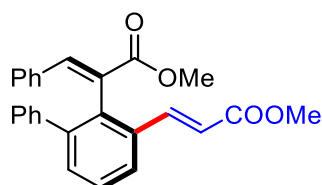

The product **5ga** was purified with silica gel chromatography (petroleum ether/ethyl acetate = 10:1) as a white solid (72% yield).  $^1\text{H}$  NMR (500 MHz,  $\text{CDCl}_3$ )  $\delta$  7.78 (s, 1H), 7.72 – 7.64 (m, 2H), 7.49 (t,  $J = 7.8$  Hz, 1H), 7.38 (dd,  $J = 7.5$ , 1.3 Hz, 1H), 7.24 – 7.17 (m, 4H), 7.14 (dd,  $J = 8.4$ , 7.0 Hz, 2H), 7.05 – 6.97 (m, 2H), 6.94 – 6.87 (m, 2H), 6.28 (d,  $J = 15.9$  Hz, 1H), 3.71 (s, 3H), 3.61 (s, 3H);  $^{13}\text{C}$  NMR (126 MHz,  $\text{CDCl}_3$ )  $\delta$  167.6, 167.0, 143.0, 142.8, 142.6, 140.6, 135.1, 134.4, 133.9, 132.0, 130.2, 129.5, 128.8, 128.5, 128.45, 128.37, 127.7, 127.1, 125.8, 119.8, 52.3, 51.6. HRMS (ESI) calcd. for  $\text{C}_{26}\text{H}_{23}\text{O}_4[\text{M}+\text{H}]^+$ : 399.1596, found: 399.1589.  $[\alpha]_{\text{D}}^{20} = -17.5$  ( $c = 0.25$ ,  $\text{CHCl}_3$ ), HPLC chiralcel AD-H column (10% isopropanol in hexanes, 1.0 mL/min,  $\lambda = 254$  nm),  $t_{\text{R}} = 9.5$  min (major), 13.7 min (minor), 99% ee.

**methyl (E)-2-(2-((E)-3-methoxy-3-oxoprop-1-en-1-yl)-6-(methoxymethyl)phenyl)-3-phenylacrylate (5ha)**

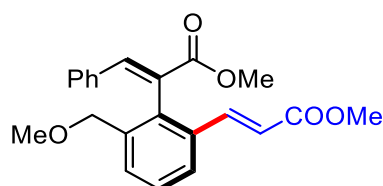

The product **5ha** was purified with silica gel chromatography (petroleum ether/ethyl

acetate = 10:1) as a white solid (45% yield). <sup>1</sup>H NMR (500 MHz, CDCl<sub>3</sub>) δ 8.01 (s, 1H), 7.71 – 7.61 (m, 2H), 7.54 (d, *J* = 7.3 Hz, 1H), 7.45 (t, *J* = 7.7 Hz, 1H), 7.24 – 7.19 (m, 1H), 7.14 (t, *J* = 7.6 Hz, 2H), 6.93 (d, *J* = 7.4 Hz, 2H), 6.32 (d, *J* = 15.9 Hz, 1H), 4.21 (dd, *J* = 85.3, 12.5 Hz, 2H), 3.75 (s, 3H), 3.71 (s, 3H), 3.23 (s, 3H); <sup>13</sup>C NMR (126 MHz, CDCl<sub>3</sub>) δ 167.7, 167.1, 142.1, 142.0, 137.4, 135.6, 134.0, 133.8, 130.2, 129.9, 129.8, 128.64, 128.57, 127.6, 126.0, 119.7, 72.4, 58.4, 52.6, 51.7. HRMS (ESI) calcd. for C<sub>22</sub>H<sub>22</sub>O<sub>5</sub>Na[M+Na]<sup>+</sup>: 389.1365, found: 389.1368. [α]<sub>D</sub><sup>20</sup> = -17.7 (c = 0.25, CHCl<sub>3</sub>), HPLC chiralcel AD-H column (10% isopropanol in hexanes, 1.0 mL/min, λ = 254 nm), t<sub>R</sub> = 13.0 min (major), 18.8 min (minor), 95% ee.

**methyl (E)-2-(6-((E)-3-methoxy-3-oxoprop-1-en-1-yl)-2,3-dimethylphenyl)-3-phenylacrylate (5ia)**

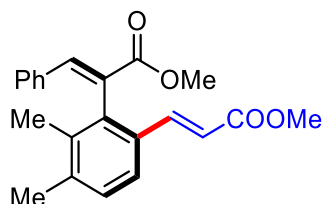

The product **5ia** was purified with silica gel chromatography (petroleum ether/ethyl acetate = 10:1) as a white solid (87% yield). <sup>1</sup>H NMR (500 MHz, CDCl<sub>3</sub>) δ 8.03 (s, 1H), 7.60 (d, *J* = 15.9 Hz, 1H), 7.46 (d, *J* = 8.0 Hz, 1H), 7.24 – 7.18 (m, 2H), 7.13 (t, *J* = 7.6 Hz, 2H), 6.93 (d, *J* = 7.7 Hz, 2H), 6.23 (d, *J* = 15.8 Hz, 1H), 3.76 (d, *J* = 0.9 Hz, 3H), 3.69 (d, *J* = 0.8 Hz, 3H), 2.33 (s, 3H), 2.04 (s, 3H); <sup>13</sup>C NMR (126 MHz, CDCl<sub>3</sub>) δ 167.9, 167.3, 143.0, 142.1, 139.6, 136.2, 135.6, 134.4, 131.2, 130.2, 130.1, 129.6, 129.2, 128.5, 124.0, 118.3, 52.6, 51.5, 20.8, 16.3. HRMS (ESI) calcd. for C<sub>22</sub>H<sub>23</sub>O<sub>4</sub>[M+H]<sup>+</sup>: 351.1596, found: 351.1605. [α]<sub>D</sub><sup>20</sup> = -7.4 (c = 0.25, CHCl<sub>3</sub>), HPLC chiralcel AD-H column (10% isopropanol in hexanes, 1.0 mL/min, λ = 254 nm), t<sub>R</sub> = 10.4 min (major), 15.0 min (minor), 98% ee.

**methyl (E)-2-(4-methoxy-2-((E)-3-methoxy-3-oxoprop-1-en-1-yl)-6-methylphenyl)-3-phenylacrylate (5ja)**

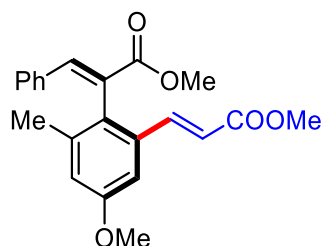

The product **5ja** was purified with silica gel chromatography (petroleum ether/ethylacetate = 10:1) as a white solid (86% yield).  $^1\text{H}$  NMR (500 MHz,  $\text{CDCl}_3$ )  $\delta$  8.02 (s, 1H), 7.59 (d,  $J = 15.9$  Hz, 1H), 7.24 – 7.18 (m, 1H), 7.16 (t,  $J = 8.4, 6.6$  Hz, 2H), 7.05 (d,  $J = 2.7$  Hz, 1H), 7.00 – 6.94 (m, 2H), 6.88 (d,  $J = 2.5$  Hz, 1H), 6.25 (d,  $J = 15.8$  Hz, 1H), 3.86 (s, 3H), 3.76 (s, 3H), 3.70 (s, 3H), 2.08 (s, 3H);  $^{13}\text{C}$  NMR (126 MHz,  $\text{CDCl}_3$ )  $\delta$  168.0, 167.1, 159.2, 142.7, 142.6, 138.8, 134.6, 134.4, 130.2, 129.7, 128.9, 128.6, 128.4, 119.5, 118.4, 108.8, 55.3, 52.6, 51.6, 20.1. HRMS (ESI) calcd. for  $\text{C}_{22}\text{H}_{24}\text{O}_5[\text{M}+\text{H}]^+$ : 367.1545, found: 367.1540.  $[\alpha]_{\text{D}}^{20} = -31.7$  ( $c = 0.25$ ,  $\text{CHCl}_3$ ), HPLC chiralcel AD-H column (10% isopropanol in hexanes, 1.0 mL/min,  $\lambda = 254$  nm),  $t_{\text{R}} = 12.3$  min (major), 16.1 min (minor), 83% ee.

**methyl (E)-2-(2-((E)-3-methoxy-3-oxoprop-1-en-1-yl)-4-methylnaphthalen-1-yl)-3-phenylacrylate (5ka)**

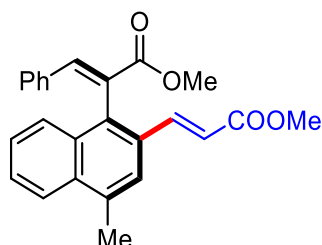

The product **5ka** was purified with silica gel chromatography (petroleum ether/ethyl acetate = 10:1) as a white solid (79% yield).  $^1\text{H}$  NMR (500 MHz,  $\text{CDCl}_3$ )  $\delta$  8.28 (s, 1H), 8.01 (d,  $J = 8.4$  Hz, 1H), 7.89 – 7.77 (m, 2H), 7.61 (s, 1H), 7.53 (dd,  $J = 8.3, 6.8$  Hz, 1H), 7.41 (dd,  $J = 8.3, 6.9$  Hz, 1H), 7.15 – 7.07 (m, 1H), 7.02 (t,  $J = 7.6$  Hz, 2H), 6.90 (d,  $J = 7.8$  Hz, 2H), 6.41 (d,  $J = 15.9$  Hz, 1H), 3.72 (s, 3H), 3.68 (s, 3H), 2.75 (s, 3H);  $^{13}\text{C}$  NMR (126 MHz,  $\text{CDCl}_3$ )  $\delta$  168.1, 167.3, 143.8, 142.3, 135.2, 134.0, 133.7, 133.5, 131.9, 130.4, 129.9, 129.6, 128.5, 127.6, 127.2, 127.0, 126.3, 124.7, 123.7, 119.3, 52.6, 51.7, 19.8. HRMS (ESI) calcd. for  $\text{C}_{25}\text{H}_{23}\text{O}_4[\text{M}+\text{H}]^+$ : 387.1596, found: 387.1591.  $[\alpha]_{\text{D}}^{20} = -40.4$  ( $c = 0.25$ ,  $\text{CHCl}_3$ ), HPLC chiralcel AD-H column (10% isopropanol in



hexanes, 1.0 mL/min,  $\lambda = 254$  nm),  $t_R = 16.9$  min (major), 22.7 min (minor), 89% ee.

**methyl (E)-2-(2-((E)-3-methoxy-3-oxoprop-1-en-1-yl)-4-phenylnaphthalen-1-yl)-3-phenylacrylate (5la)**

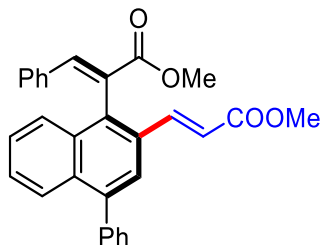

The product **5la** was purified with silica gel chromatography (petroleum ether/ethyl acetate = 10:1) as a white solid (77% yield).  $^1\text{H}$  NMR (500 MHz,  $\text{CDCl}_3$ )  $\delta$  8.32 (s, 1H), 8.01 – 7.91 (m, 1H), 7.91 – 7.82 (m, 2H), 7.71 (s, 1H), 7.57 (d,  $J = 6.8$  Hz, 2H), 7.53 (t,  $J = 7.5$  Hz, 2H), 7.50 – 7.37 (m, 3H), 7.21 – 7.11 (m, 1H), 7.06 (t,  $J = 7.6$  Hz, 2H), 6.95 (d,  $J = 7.6$  Hz, 2H), 6.42 (d,  $J = 15.9$  Hz, 1H), 3.73 (s, 3H), 3.71 (s, 3H);  $^{13}\text{C}$  NMR (126 MHz,  $\text{CDCl}_3$ )  $\delta$  168.0, 167.2, 144.0, 142.1, 141.1, 140.1, 134.5, 134.0, 132.7, 132.3, 130.4, 130.1, 129.9, 129.8, 128.6, 128.5, 127.7, 127.5, 127.4, 127.2, 126.7, 126.1, 124.1, 119.8, 52.7, 51.7. HRMS (ESI) calcd. for  $\text{C}_{30}\text{H}_{24}\text{O}_4\text{Na}[\text{M}+\text{Na}]^+$ : 471.1572, found: 471.1569.  $[\alpha]_{\text{D}}^{20} = -59.4$  ( $c = 0.25$ ,  $\text{CHCl}_3$ ), HPLC chiralcel AD-H column (10% isopropanol in hexanes, 1.0 mL/min,  $\lambda = 254$  nm),  $t_R = 10.3$  min (major), 21.1 min (minor), 93% ee.

**methyl (E)-2-(2-((E)-3-methoxy-3-oxoprop-1-en-1-yl)pyren-1-yl)-3-phenylacrylate (5ma)**

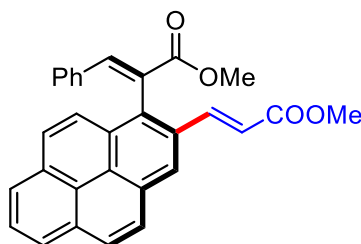

The product **5ma** was purified with silica gel chromatography (petroleum ether/ethyl acetate = 10:1) as a yellow solid (54% yield).  $^1\text{H}$  NMR (500 MHz,  $\text{CDCl}_3$ )  $\delta$  8.48 (s, 1H), 8.41 (s, 1H), 8.17 (ddd,  $J = 17.3, 7.6, 1.2$  Hz, 2H), 8.10 (d,  $J = 1.9$  Hz, 2H), 8.06 (d,  $J = 15.8$  Hz, 1H), 8.01 (d,  $J = 3.5$  Hz, 3H), 7.11 – 7.02 (m, 1H), 6.94 (t,  $J = 7.8$  Hz,

2H), 6.83 (dd,  $J = 8.2, 1.4$  Hz, 2H), 6.61 (d,  $J = 15.9$  Hz, 1H), 3.78 (s, 3H), 3.69 (s, 3H);  $^{13}\text{C}$  NMR (126 MHz,  $\text{CDCl}_3$ )  $\delta$  168.2, 167.1, 144.1, 143.1, 134.0, 131.5, 131.4, 131.24, 131.19, 131.0, 130.5, 129.7, 128.8, 128.5, 128.4, 127.9, 127.5, 126.7, 125.8, 125.69, 125.67, 124.6, 122.8, 120.5, 52.7, 51.8. HRMS (ESI) calcd. for  $\text{C}_{30}\text{H}_{22}\text{NaO}_4[\text{M}+\text{Na}]^+$ : 469.1416, found: 469.1416.  $[\alpha]_{\text{D}}^{20} = -33.6$  ( $c = 0.25$ ,  $\text{CHCl}_3$ ), HPLC chiralcel AD-3 column (5% isopropanol in hexanes, 0.5 mL/min,  $\lambda = 254$  nm),  $t_{\text{R}} = 72.7$  min (major), 46.4 min (minor), >99% ee.

**methyl (E)-2-(2-((E)-3-(benzyloxy)-3-oxoprop-1-en-1-yl)naphthalen-1-yl)-3-phenylacrylate (5ab)**

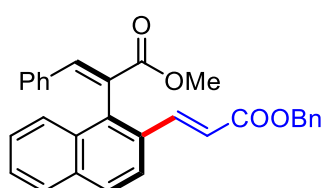

The product **5ab** was purified with silica gel chromatography (petroleum ether/ethyl acetate = 10:1) as a white solid (79% yield).  $^1\text{H}$  NMR (500 MHz,  $\text{CDCl}_3$ )  $\delta$  8.28 (s, 1H), 7.93 – 7.84 (m, 3H), 7.80 (d,  $J = 8.4$  Hz, 1H), 7.75 (d,  $J = 8.8$  Hz, 1H), 7.49 (t,  $J = 7.4$  Hz, 1H), 7.41 (t,  $J = 7.6$  Hz, 1H), 7.38 – 7.26 (m, 5H), 7.10 (t,  $J = 7.4$  Hz, 1H), 7.00 (t,  $J = 7.7$  Hz, 2H), 6.85 (d,  $J = 7.6$  Hz, 2H), 6.45 (d,  $J = 15.9$  Hz, 1H), 5.35 – 4.97 (m, 2H), 3.68 (s, 3H);  $^{13}\text{C}$  NMR (126 MHz,  $\text{CDCl}_3$ )  $\delta$  168.0, 166.6, 143.9, 142.7, 136.1, 135.3, 134.3, 133.9, 131.9, 130.39, 130.36, 129.7, 129.0, 128.6, 128.51, 128.45, 128.22, 128.17, 127.5, 127.40, 127.36, 125.8, 123.1, 119.6, 66.2, 52.7. HRMS (ESI) calcd. for  $\text{C}_{30}\text{H}_{25}\text{O}_4[\text{M}+\text{H}]^+$ : 449.1753, found: 449.1760.  $[\alpha]_{\text{D}}^{20} = -25.7$  ( $c = 0.25$ ,  $\text{CHCl}_3$ ), HPLC chiralcel ID column (10% isopropanol in hexanes, 1.0 mL/min,  $\lambda = 254$  nm),  $t_{\text{R}} = 24.9$  min (major), 22.6 min (minor), 96% ee.

**methyl (E)-2-(2-((E)-3-(cyclohexyloxy)-3-oxoprop-1-en-1-yl)naphthalen-1-yl)-3-phenylacrylate (5ac)**

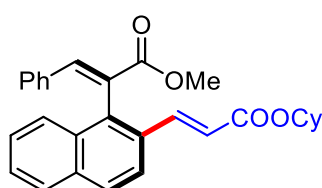

The product **5ac** was purified with silica gel chromatography (petroleum ether/ethyl

acetate = 10:1) as a white solid (88% yield).  $^1\text{H}$  NMR (500 MHz,  $\text{CDCl}_3$ )  $\delta$  8.28 (s, 1H), 7.92 – 7.72 (m, 5H), 7.48 (t,  $J = 7.5$  Hz, 1H), 7.40 (t,  $J = 7.6$  Hz, 1H), 7.18 – 7.05 (m, 1H), 7.01 (t,  $J = 7.7$  Hz, 2H), 6.87 (d,  $J = 7.8$  Hz, 2H), 6.40 (d,  $J = 15.9$  Hz, 1H), 4.85 – 4.80 (m, 1H), 3.68 (s, 3H), 1.83 (m, 2H), 1.75 – 1.67 (m, 2H), 1.57 – 1.22 (m, 6H);  $^{13}\text{C}$  NMR (126 MHz,  $\text{CDCl}_3$ )  $\delta$  168.0, 166.2, 143.8, 141.7, 135.0, 134.2, 134.0, 132.0, 130.5, 130.4, 129.6, 128.9, 128.5, 128.4, 127.6, 127.28, 127.25, 125.8, 123.2, 120.6, 72.6, 52.6, 31.7, 25.5, 23.7. HRMS (ESI) calcd. for  $\text{C}_{29}\text{H}_{28}\text{O}_4\text{Na}[\text{M}+\text{Na}]^+$ : 463.1885, found: 463.1896.  $[\alpha]_{\text{D}}^{20} = -70.2$  ( $c = 0.25$ ,  $\text{CHCl}_3$ ), HPLC chiralcel AD-H column (10% isopropanol in hexanes, 1.0 mL/min,  $\lambda = 254$  nm),  $t_{\text{R}} = 10.5$  min (major), 14.7 min (minor), 95% ee.

**methyl (E)-2-(2-((E)-3-(tert-butoxy)-3-oxoprop-1-en-1-yl)naphthalen-1-yl)-3-phenylacrylate (5ad)**

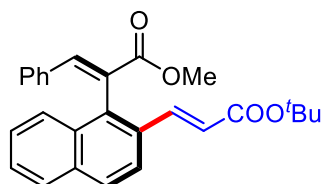

The product **5ad** was purified with silica gel chromatography (petroleum ether/ethyl acetate = 10:1) as a white solid (99% yield).  $^1\text{H}$  NMR (500 MHz,  $\text{CDCl}_3$ )  $\delta$  8.27 (s, 1H), 7.97 – 7.83 (m, 2H), 7.82 – 7.69 (m, 3H), 7.48 (m, 1H), 7.40 (m, 1H), 7.17 – 7.07 (m, 1H), 7.02 (dd,  $J = 8.5, 7.0$  Hz, 2H), 6.93 – 6.79 (m, 2H), 6.34 (d,  $J = 15.8$  Hz, 1H), 3.69 (s, 3H), 1.47 (s, 9H);  $^{13}\text{C}$  NMR (126 MHz,  $\text{CDCl}_3$ )  $\delta$  168.0, 166.1, 143.7, 141.0, 134.8, 134.1, 134.1, 131.9, 130.7, 130.4, 129.6, 128.8, 128.44, 128.37, 127.6, 127.23, 127.15, 125.7, 123.2, 121.9, 80.4, 52.6, 28.2. HRMS (ESI) calcd. for  $\text{C}_{27}\text{H}_{26}\text{O}_4\text{Na}[\text{M}+\text{Na}]^+$ : 437.1729, found: 437.1733.  $[\alpha]_{\text{D}}^{20} = -63.1$  ( $c = 0.25$ ,  $\text{CHCl}_3$ ), HPLC chiralcel AD-H column (10% isopropanol in hexanes, 1.0 mL/min,  $\lambda = 254$  nm),  $t_{\text{R}} = 11.4$  min (major), 9.0 min (minor), 99% ee.

**methyl (E)-2-(2-((E)-3-isobutoxy-3-oxoprop-1-en-1-yl)naphthalen-1-yl)-3-phenylacrylate (5ae)**

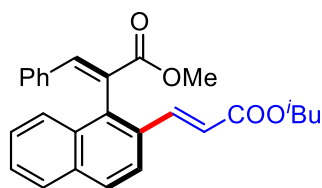

The product **5ae** was purified with silica gel chromatography (petroleum ether/ethyl acetate = 10:1) as a white solid (84% yield).  $^1\text{H}$  NMR (500 MHz,  $\text{CDCl}_3$ )  $\delta$  8.28 (s, 1H), 7.94 – 7.84 (m, 3H), 7.79 (dd,  $J = 14.0, 8.6$  Hz, 2H), 7.57 – 7.45 (m, 1H), 7.41 (ddd,  $J = 8.3, 6.9, 1.2$  Hz, 1H), 7.11 (t,  $J = 7.3$  Hz, 1H), 7.01 (t,  $J = 7.7$  Hz, 2H), 6.92 – 6.83 (m, 2H), 6.43 (d,  $J = 15.9$  Hz, 1H), 3.92 (dd,  $J = 6.6, 2.4$  Hz, 2H), 3.68 (s, 3H), 1.95 (dp,  $J = 13.4, 6.7$  Hz, 1H), 0.93 (dd,  $J = 6.8, 1.6$  Hz, 6H);  $^{13}\text{C}$  NMR (126 MHz,  $\text{CDCl}_3$ )  $\delta$  168.0, 166.8, 143.8, 142.0, 135.1, 134.2, 133.9, 131.9, 130.43, 130.39, 129.7, 128.9, 128.5, 128.4, 127.5, 127.3, 125.8, 123.1, 120.0, 70.6, 52.7, 27.8, 19.2. HRMS (ESI) calcd. for  $\text{C}_{27}\text{H}_{26}\text{O}_4\text{Na}[\text{M}+\text{Na}]^+$ : 437.1729, found: 437.1729.  $[\alpha]_{\text{D}}^{20} = -59.6$  ( $c = 0.25$ ,  $\text{CHCl}_3$ ), HPLC chiralcel AD-H column (10% isopropanol in hexanes, 1.0 mL/min,  $\lambda = 254$  nm),  $t_{\text{R}} = 11.3$  min (major), 16.1 min (minor), 94% ee.

**methyl (E)-2-(2-((E)-3-(tert-butoxy)-3-oxoprop-1-en-1-yl)naphthalen-1-yl)-3-phenylacrylate (5af)**

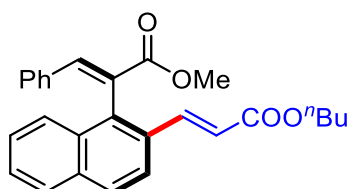

The product **5af** was purified with silica gel chromatography (petroleum ether/ethyl acetate = 10:1) as a white solid (91% yield).  $^1\text{H}$  NMR (500 MHz,  $\text{CDCl}_3$ )  $\delta$  8.28 (s, 1H), 7.95 – 7.65 (m, 5H), 7.49 (m, 1H), 7.40 (m, 1H), 7.18 – 7.06 (m, 1H), 7.01 (t,  $J = 7.7$  Hz, 2H), 6.91 – 6.80 (m, 2H), 6.41 (d,  $J = 15.9$  Hz, 1H), 4.13 (m, 2H), 3.68 (s, 3H), 1.75 – 1.50 (m, 2H), 1.47 – 1.31 (m, 2H), 0.93 (t,  $J = 7.4$  Hz, 3H);  $^{13}\text{C}$  NMR (126 MHz,  $\text{CDCl}_3$ )  $\delta$  168.0, 166.9, 143.8, 142.0, 135.1, 134.2, 134.0, 131.9, 130.5, 130.4, 129.7, 128.9, 128.5, 128.4, 127.5, 127.3, 125.8, 123.1, 120.0, 64.4, 52.7, 30.7, 19.2, 13.8. HRMS (ESI) calcd. for  $\text{C}_{27}\text{H}_{26}\text{O}_4\text{Na}[\text{M}+\text{Na}]^+$ : 437.1729, found: 439.1727.  $[\alpha]_{\text{D}}^{20} = -70.2$  ( $c = 0.25$ ,  $\text{CHCl}_3$ ), HPLC chiralcel AD-H column (10% isopropanol in hexanes, 1.0 mL/min,  $\lambda = 254$  nm),  $t_{\text{R}} = 15.0$  min (major), 20.0 min (minor), 91% ee.

**methyl (E)-2-(2-((E)-3-oxo-3-phenoxyprop-1-en-1-yl)naphthalen-1-yl)-3-phenylacrylate (5ag)**

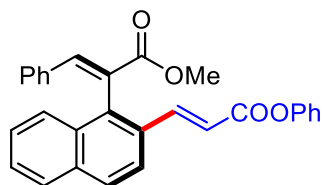

The product **5ag** was purified with silica gel chromatography (petroleum ether/ethyl acetate = 10:1) as a white solid (53% yield).  $^1\text{H}$  NMR (500 MHz,  $\text{CDCl}_3$ )  $\delta$  8.29 (s, 1H), 8.01 (d,  $J = 15.9$  Hz, 1H), 7.98 – 7.88 (m, 2H), 7.83 (d,  $J = 8.7$  Hz, 2H), 7.53 (m, 1H), 7.44 (m, 1H), 7.41 – 7.34 (m, 2H), 7.29 – 7.19 (m, 1H), 7.18 – 7.12 (m, 1H), 7.12 – 7.07 (m, 2H), 7.04 (dd,  $J = 8.5, 7.1$  Hz, 2H), 6.89 (dd,  $J = 8.4, 1.4$  Hz, 2H), 6.59 (d,  $J = 15.8$  Hz, 1H), 3.71 (s, 3H);  $^{13}\text{C}$  NMR (126 MHz,  $\text{CDCl}_3$ )  $\delta$  167.9, 165.2, 150.8, 144.04, 144.0, 135.6, 134.4, 133.9, 132.0, 130.4, 130.1, 129.8, 129.4, 129.1, 128.54, 128.48, 127.6, 127.5, 127.4, 125.9, 125.8, 123.1, 121.6, 119.0, 52.7. HRMS (ESI) calcd. for  $\text{C}_{29}\text{H}_{22}\text{O}_4\text{Na}[\text{M}+\text{Na}]^+$ : 457.1416, found: 457.1422.  $[\alpha]_{\text{D}}^{20} = -31.0$  ( $c = 0.25$ ,  $\text{CHCl}_3$ ), HPLC chiralcel AD-H column (10% isopropanol in hexanes, 1.0 mL/min,  $\lambda = 254$  nm),  $t_{\text{R}} = 16.8$  min (major), 21.0 min (minor), 92% ee.

**methyl (E)-2-(2-((E)-3-oxo-3-(2,2,2-trifluoroethoxy)prop-1-en-1-yl)naphthalen-1-yl)-3-phenylacrylate (5ah)**

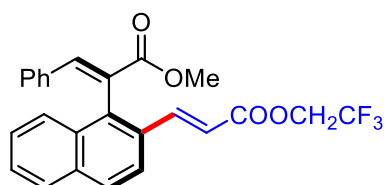

The product **5ah** was purified with silica gel chromatography (petroleum ether/ethyl acetate = 10:1) as a white solid (76% yield).  $^1\text{H}$  NMR (500 MHz,  $\text{CDCl}_3$ )  $\delta$  8.30 (s, 1H), 7.99 – 7.84 (m, 3H), 7.82 (d,  $J = 8.4$  Hz, 1H), 7.76 (d,  $J = 8.7$  Hz, 1H), 7.52 (m, 1H), 7.43 (m, 1H), 7.12 (t,  $J = 7.3$  Hz, 1H), 7.02 (t,  $J = 7.7$  Hz, 2H), 6.91 – 6.81 (m, 2H), 6.43 (d,  $J = 15.8$  Hz, 1H), 4.51 (qd,  $J = 8.5, 3.1$  Hz, 2H), 3.70 (s, 3H);  $^{13}\text{C}$  NMR (126 MHz,  $\text{CDCl}_3$ )  $\delta$  167.9, 165.0, 144.6, 144.1, 135.9, 134.5, 133.9, 132.0, 130.3, 129.81, 129.75, 129.1, 128.52, 128.48, 127.7, 127.5, 127.3, 125.9, 123.1 (q,  $J = 277.83$  Hz), 123.0, 117.5, 60.3 (q,  $J = 36.7$  Hz), 52.7.  $^{19}\text{F}$  NMR (471 MHz,  $\text{CDCl}_3$ )  $\delta$  -73.7. HRMS (ESI) calcd. for  $\text{C}_{25}\text{H}_{29}\text{F}_3\text{O}_4\text{Na}[\text{M}+\text{Na}]^+$ : 463.1133, found: 463.1141.  $[\alpha]_{\text{D}}^{20} = -29.4$  ( $c$

= 0.25, CHCl<sub>3</sub>), HPLC chiralcel AD-H column (10% isopropanol in hexanes, 1.0 mL/min, λ = 254 nm), t<sub>R</sub> = 14.0 min (major), 18.1 min (minor), 91% ee.

**methyl (E)-2-(2-((E)-4-methoxystyryl)naphthalen-1-yl)-3-phenylacrylate (5ai)**

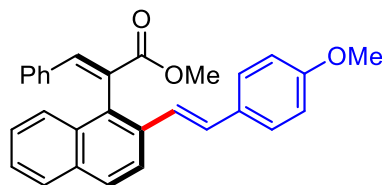

The product **5ai** was purified with silica gel chromatography (petroleum ether/ethyl acetate = 10:1) as a white solid (59% yield). <sup>1</sup>H NMR (500 MHz, CDCl<sub>3</sub>) δ 8.28 (s, 1H), 7.91 – 7.86 (m, 2H), 7.84 (d, *J* = 8.0 Hz, 1H), 7.73 (d, *J* = 8.3 Hz, 1H), 7.46 – 7.38 (m, 1H), 7.38 – 7.29 (m, 3H), 7.16 – 7.06 (m, 3H), 7.02 (t, *J* = 7.7 Hz, 2H), 6.97 (d, *J* = 7.5 Hz, 2H), 6.84 (d, *J* = 8.7 Hz, 2H), 3.79 (s, 3H), 3.67 (s, 3H); <sup>13</sup>C NMR (126 MHz, CDCl<sub>3</sub>) δ 168.7, 159.4, 143.0, 134.3, 133.4, 133.0, 132.0, 131.3, 130.4, 130.3, 130.2, 129.5, 128.52, 128.45, 128.3, 128.0, 126.9, 125.9, 125.2, 124.1, 122.9, 114.1, 55.3, 52.6. HRMS (ESI) calcd. for C<sub>28</sub>H<sub>24</sub>O<sub>3</sub>Na[M+Na]<sup>+</sup>: 443.1623, found: 443.1622. [α]<sub>D</sub><sup>20</sup> = -18.9 (c = 0.25, CHCl<sub>3</sub>), HPLC chiralcel AD-H column (10% isopropanol in hexanes, 1.0 mL/min, λ = 254 nm), t<sub>R</sub> = 13.6 min (major), 23.3 min (minor), 98% ee.

**methyl (E)-2-(2-((E)-4-(trifluoromethyl)styryl)naphthalen-1-yl)-3-phenylacrylate (5aj)**

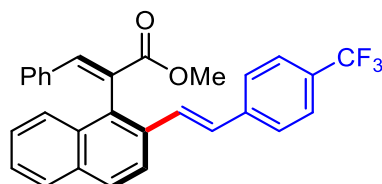

The product **5aj** was purified with silica gel chromatography (petroleum ether/ethyl acetate = 10:1) as a white solid (60% yield). <sup>1</sup>H NMR (500 MHz, CDCl<sub>3</sub>) δ 8.30 (s, 1H), 7.95 – 7.84 (m, 3H), 7.77 (dd, *J* = 8.3, 1.1 Hz, 1H), 7.55 (d, *J* = 8.1 Hz, 2H), 7.51 – 7.45 (m, 3H), 7.41 (m, 1H), 7.33 (d, *J* = 16.2 Hz, 1H), 7.15 – 7.09 (m, 2H), 7.04 (dd, *J* = 8.4, 7.1 Hz, 2H), 7.00 – 6.91 (m, 2H), 3.69 (s, 3H); <sup>13</sup>C NMR (126 MHz, CDCl<sub>3</sub>) δ 168.5, 143.3, 140.9, 134.1, 133.4, 132.6, 132.4, 132.0, 130.3, 129.7, 129.5, 129.0, 128.8, 128.5, 128.3, 128.2, 127.1, 126.8, 126.7, 126.5, 126.5, 125.6 (q, *J* = 3.8 Hz), 125.4, 122.9, 52.7; <sup>19</sup>F NMR (471 MHz, CDCl<sub>3</sub>) δ -62.5. HRMS (ESI) calcd. for C<sub>29</sub>H<sub>21</sub>F<sub>3</sub>O<sub>2</sub>Na[M+Na]<sup>+</sup>: 481.1391, found: 481.1386. [α]<sub>D</sub><sup>20</sup> = -4.4 (c = 0.25, CHCl<sub>3</sub>),

HPLC chiralcel AD-H column (10% isopropanol in hexanes, 1.0 mL/min,  $\lambda = 254$  nm),  $t_R = 8.8$  min (major), 19.0 min (minor), 96% ee.

### 3.4 Reduction of CCA 1

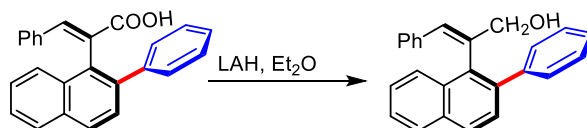

To a stirred cold solution of **CCA 1** (0.2 mmol) in dry Et<sub>2</sub>O (5mL), which was placed in a 25mL round flask. The mixture was stirred at -78 °C. To this solution was added LAH (Lithium Aluminum Hydride) (0.6 mmol, 3 equiv) slowly. The resulting mixture was allowed to warm to room temperature and stirred for 2 hours until the substrate was consumed completely which was detected by TLC. Upon completion, the reaction was moved to 0 °C, and 1.3 mL water added dropwisely followed by 1.3 mL NaOH solution (15% in water), and then 1.3 mL water was added dropwisely, further stirred at room temperature for 15 minutes, after that, Na<sub>2</sub>SO<sub>4</sub> solid was added, then filtered. Then water 10mL was added, organic layers was separated. The aqueous layer was extracted with EA (10 mL) for two times, and the organic layers were combined. The solution was dried over Na<sub>2</sub>SO<sub>4</sub> and concentrated. The residue was purified by flash column chromatography to afford **6**. The product **6** was purified with silica gel chromatography (petroleum ether/ethyl acetate = 1:1) as a white solid (85% yield).

<sup>1</sup>H NMR (500 MHz, CDCl<sub>3</sub>)  $\delta$  8.00 (d,  $J = 8.4$  Hz, 1H), 7.90 (t,  $J = 8.8$  Hz, 2H), 7.52 (d,  $J = 8.4$  Hz, 1H), 7.49 – 7.45 (m, 1H), 7.44 – 7.38 (m, 1H), 7.33 – 7.26 (m, 5H), 7.10 – 7.00 (m, 3H), 7.00 – 6.92 (m, 3H), 4.23 – 3.87 (m, 2H); <sup>13</sup>C NMR (126 MHz, CDCl<sub>3</sub>)  $\delta$  141.5, 138.2, 137.5, 136.3, 133.9, 133.0, 131.0, 129.3, 128.9, 128.7, 128.6, 128.32, 128.25, 128.04, 127.95, 127.2, 127.1, 127.0, 126.1, 125.8, 67.7. HRMS (ESI) calcd. for C<sub>25</sub>H<sub>20</sub>ONa[M+Na]<sup>+</sup>: 359.1412, found: 359.1410.  $[\alpha]_D^{20} = -40.1$  (c = 0.25, CHCl<sub>3</sub>), HPLC chiralcel AD-H column (10% isopropanol in hexanes, 1.0 mL/min,  $\lambda = 254$  nm),  $t_R = 12.0$  min (major), 10.8 min (minor), 94% ee.

### 3.5 Transformation of **5aa** [3]

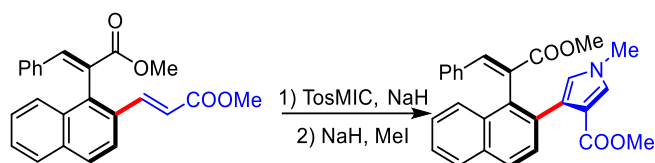

To a suspension of NaH (60% dispersion in mineral oil, 3 equiv.) in dry DMF (5 mL) was added a solution of **5aa** (0.2 mmol) and tosylmethylisocyanate (TosMIC) (1.2 equiv) in dry DMF (0.3 M final concentration) dropwise at 0 °C. Then the reaction mixture was stirred at 0 °C for 0.5 hours, diluted with ethyl acetate and brine. The organic layer was washed with water, dried over Na<sub>2</sub>SO<sub>4</sub>, filtered and concentrated. The crude product was dissolved in dry DMF and NaH (60% dispersion in mineral oil, 1.2 equiv.) was added. The mixture was stirred for 20 minutes and iodomethane (1.2 equiv.) were added dropwise at 0 °C. Then the reaction mixture was warmed to room temperature and stirred for 1 hours, diluted with ethyl acetate and brine. The organic layer was washed with water and, brine, dried over Na<sub>2</sub>SO<sub>4</sub>, filtered and concentrated. The residue was purified by flash chromatography (petroleum ether/ethyl acetate = 2:1) on silica gel to afford **7** as a white solid in 77% yield and 93% ee.

<sup>1</sup>H NMR (500 MHz, CDCl<sub>3</sub>) δ 7.95 (s, 1H), 7.87 (d, *J* = 8.6 Hz, 2H), 7.75 (d, *J* = 8.5 Hz, 1H), 7.55 (d, *J* = 8.5 Hz, 1H), 7.43 (ddd, *J* = 8.1, 6.9, 1.2 Hz, 1H), 7.34 (ddd, *J* = 8.2, 6.9, 1.3 Hz, 1H), 7.18 (d, *J* = 2.4 Hz, 1H), 7.13 – 7.07 (m, 1H), 7.03 (t, *J* = 7.6 Hz, 2H), 7.00 – 6.92 (m, 2H), 6.20 (d, *J* = 2.4 Hz, 1H), 3.59 (s, 3H), 3.54 (s, 3H), 3.52 (s, 3H); <sup>13</sup>C NMR (126 MHz, CDCl<sub>3</sub>) δ 169.0, 164.4, 141.9, 134.6, 132.8, 132.6, 131.6, 131.5, 130.51, 130.48, 129.8, 129.1, 128.3, 128.2, 127.8, 126.8, 126.3, 125.6, 125.4, 125.0, 122.4, 113.8, 52.1, 50.5, 36.6. HRMS (ESI) calcd. for C<sub>27</sub>H<sub>23</sub>NO<sub>4</sub>Na[M+Na]<sup>+</sup>: 448.1525, found: 448.1520. [α]<sub>D</sub><sup>20</sup> = -24.5 (c = 0.25, CHCl<sub>3</sub>), HPLC chiralcel AS-H column (5% isopropanol in hexanes, 0.5 mL/min, λ = 254 nm), t<sub>R</sub> = 43.3 min (major), 50.0 min (minor), 93% ee.



### 3.6 Co<sup>III</sup>-catalyzed enantioselective C(sp<sup>3</sup>)-H amidation of thioamide. <sup>[4]</sup>

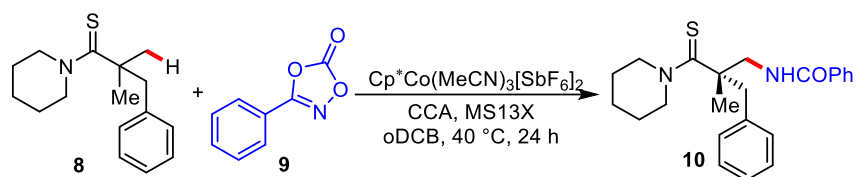

To an oven-dried 25 mL Schlenk tube was added thioamide **8** (0.20 mmol, 1.0 equiv), dioxazolone **9** (0.24 mmol, 1.2 equiv), CCA (0.02 mmol, 10 mol %), [Cp\*Co(MeCN)<sub>3</sub>][SbF<sub>6</sub>]<sub>2</sub> (0.01 mmol), activated MS13X (40 mg), and *o*-dichlorobenzene (1 mL). The tube was then charged with N<sub>2</sub>. The reaction mixture was stirred for 24 hours at 40 °C, the reaction mixture was cooled to room temperature and purified by silica gel column chromatography (petroleum ether/ethyl acetate = 5:1), to afford **10**.

**10** is known compound. <sup>1</sup>H NMR (500 MHz, CDCl<sub>3</sub>) δ 7.87 – 7.83 (m, 1H), 7.77 (d, *J* = 8.1 Hz, 2H), 7.55 – 7.44 (m, 1H), 7.43 – 7.38 (m, 2H), 7.30 (t, *J* = 7.5 Hz, 2H), 7.27 – 7.19 (m, 3H), 4.12 (d, *J* = 12.6 Hz, 3H), 4.02 – 3.84 (m, 3H), 3.19 (d, *J* = 14.2 Hz, 1H), 2.97 (d, *J* = 14.2 Hz, 1H), 1.75 (s, 6H), 1.39 (s, 3H); <sup>13</sup>C NMR (126 MHz, CDCl<sub>3</sub>) δ 207.5, 167.27, 136.3, 134.8, 131.3, 130.3, 128.5, 128.4, 127.02, 126.98, 54.4, 53.0, 51.5, 43.5, 26.2, 24.2, 22.4. HPLC chiralcel IF column (10% isopropanol in hexanes, 1.0 mL/min, λ = 284 nm).

### 3.7 Co<sup>III</sup>-catalyzed enantioselective 1,4-addition of indole and maleimides<sup>[5]</sup>

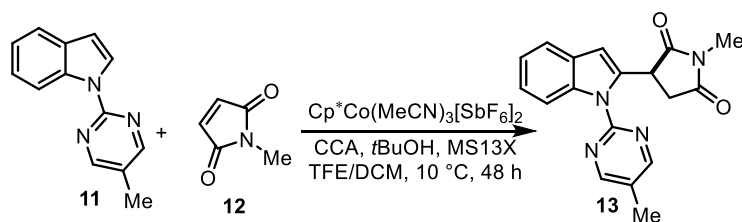

To an oven-dried 25 mL Schlenk tube was added *N*-5-methyl-pyrimidyl indole **11** (0.20 mmol, 1.0 equiv), maleimide **12** (0.4 mmol, 2 equiv), CCA (0.02 mmol, 10 mol %), [Cp\*Co(MeCN)<sub>3</sub>][SbF<sub>6</sub>]<sub>2</sub> (0.01 mmol), activated MS13X (40 mg). To the mixture were added *t*BuOK in TFE (0.1 M, 240 μL, 0.024 mmol, 12 mol %), TFE (560 μL), and DCM (200 μL) at 4 °C, and the mixture was stirred at 10 °C. After 72 hours, the reaction mixture was filtered through a short pad of silica gel and purified by silica gel column

chromatography (petroleum ether/ethyl acetate = 4/1 to 1/1) to afford **13** as white solid..

**13** is known compound.  $^1\text{H}$  NMR (400 MHz,  $\text{CDCl}_3$ )  $\delta$  8.56 (d,  $J = 8.5$  Hz, 1H), 8.42 (s, 2H), 7.56 (d,  $J = 7.7$  Hz, 1H), 7.31 (t,  $J = 7.8$  Hz, 1H), 7.22 (t,  $J = 7.4$  Hz, 1H), 6.68 (s, 1H), 4.76 (dd,  $J = 9.4, 5.8$  Hz, 1H), 3.31 – 3.00 (m, 4H), 2.89 (dd,  $J = 18.1, 5.8$  Hz, 1H), 2.29 (s, 3H). HPLC chiralcel IB column (50% isopropanol in hexanes, 0.5 mL/min,  $\lambda = 254$  nm).

### 3.8 General Procedure for CCAs

#### For CCA 1 – CCA 3.

A sealed tube with magnetic stir bar was charged with substrate (0.2 mmol), phenylboronic acid pinacol ester (0.4 mmol),  $\text{Pd}(\text{OAc})_2$  (10 mol%, 4.5 mg), Boc-*tert*-L-leucine (0.04 mmol, 9.2 mg),  $\text{Ag}_2\text{CO}_3$  (0.3 mol, 82.7 mg), BQ (0.1 mmol, 10.8 mg),  $\text{KHCO}_3$  (0.4 mmol, 40 mg),  $\text{H}_2\text{O}$  72  $\mu\text{L}$  and *t*AmylOH 1 mL as solvent in air. The reaction mixture was stirred at 40  $^\circ\text{C}$  for 72 hours. Upon completion, the reaction was diluted with ethyl acetate, and filtered through a plug of Celite. The solvent was concentrated *in vacuo* and purified by preparative TLC (DCM/MeOH = 30:1) to afford the product.

#### For CCA 4 – CCA 6.

Substrate (0.2 mmol),  $\text{Pd}(\text{OAc})_2$  (10 mol%, 4.5 mg), Boc-*tert*-L-leucine (0.06 mmol, 14.0 mg) were placed in a Schlenk tube, which was filled with oxygen by using standard Schlenk techniques. After which, *i*PrOH (2mL) was added using a syringe. Olefin (0.6 mmol) and a solution of KOH (22.4 mg in 36  $\mu\text{L}$   $\text{H}_2\text{O}$ ) was added via microsyringe, subsequently. The reaction mixture was stirred at 30  $^\circ\text{C}$  for 72 hours. Upon completion, the reaction was diluted with ethyl acetate, and filtered through a plug of Celite. The solvent was concentrated *in vacuo* and purified by flash chromatography (DCM/MeOH = 100:1) to afford the product.

#### (*E*)-3-phenyl-2-(2-phenylnaphthalen-1-yl)acrylic acid (CCA 1)

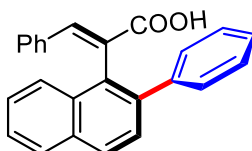

The product **CCA 1** was purified with preparative TLC (DCM/MeOH = 30:1) as a white solid (77 % yield).  $^1\text{H}$  NMR (400 MHz,  $\text{CDCl}_3$ )  $\delta$  7.97 – 7.91 (m, 3H), 7.87 – 7.81 (m, 1H), 7.56 – 7.41 (m, 3H), 7.24 – 7.11 (m, 4H), 7.08 – 6.96 (m, 4H), 6.82 – 6.74 (m, 2H);  $^{13}\text{C}$  NMR (126 MHz,  $\text{CDCl}_3$ )  $\delta$  172.8, 144.7, 141.6, 139.3, 134.3, 132.8, 131.8, 130.6, 130.4, 129.7, 128.8, 128.7, 128.6, 128.44, 128.39, 128.3, 127.7, 127.0, 126.9, 126.1, 125.3. HRMS (ESI) calcd. for  $\text{C}_{25}\text{H}_{18}\text{O}_2\text{Na}[\text{M}+\text{Na}]^+$ : 373.1204, found: 373.1207.  $[\alpha]_{\text{D}}^{20} = -16.9$  ( $c = 0.25$ ,  $\text{CHCl}_3$ ), The ee value determined by corresponding methyl ester (**3ab**), HPLC chiralcel AD-H column (10% isopropanol in hexanes, 1.0 mL/min,  $\lambda = 254$  nm),  $t_{\text{R}} = 11.6$  min (major), 8.2 min (minor), 94% ee.

**(E)-2-(3,4-dimethyl-[1,1'-biphenyl]-2-yl)-3-phenylacrylic acid (CCA 2)**

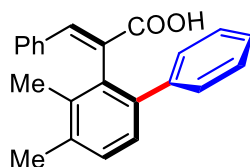

The product **CCA 2** was purified with preparative TLC (DCM/MeOH = 30:1) as a white solid (59 % yield).  $^1\text{H}$  NMR (400 MHz,  $\text{CDCl}_3$ )  $\delta$  7.70 (s, 1H), 7.30 – 7.21 (m, 2H), 7.19 – 7.11 (m, 5H), 7.08 (d,  $J = 7.7$  Hz, 1H), 6.99 – 6.95 (m, 2H), 6.93 – 6.88 (m, 2H), 2.37 (s, 3H), 2.14 (s, 3H);  $^{13}\text{C}$  NMR (101 MHz,  $\text{CDCl}_3$ )  $\delta$  172.3, 142.8, 141.8, 139.7, 136.2, 135.2, 134.7, 133.4, 130.5, 130.3, 129.9, 129.6, 128.7, 128.3, 127.7, 127.5, 126.5, 20.6, 16.4. HRMS (ESI) calcd. for  $\text{C}_{23}\text{H}_{20}\text{O}_2\text{Na}[\text{M}+\text{Na}]^+$ : 351.1361, found: 351.1358.  $[\alpha]_{\text{D}}^{20} = -39.1$  ( $c = 0.25$ ,  $\text{CHCl}_3$ ), The ee value determined by corresponding methyl ester, HPLC chiralcel AD-H column (10% isopropanol in hexanes, 1.0 mL/min,  $\lambda = 254$  nm),  $t_{\text{R}} = 5.5$  min (major), 5.2 min (minor), 98% ee.

**(E)-2-(3-isopropyl-[1,1'-biphenyl]-2-yl)-3-phenylacrylic acid (CCA 3)**

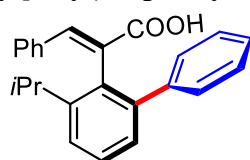

The product **CCA 3** was purified with preparative TLC (DCM/MeOH = 30:1) as a white solid (71 % yield).  $^1\text{H}$  NMR (500 MHz,  $\text{CDCl}_3$ )  $\delta$  7.70 (s, 1H), 7.56 – 7.37 (m, 2H), 7.23 (d,  $J = 7.4$  Hz, 1H), 7.14 (dt,  $J = 17.6, 6.6$  Hz, 6H), 6.99 (d,  $J = 7.2$  Hz, 2H), 6.91

(d,  $J = 7.7$  Hz, 2H), 2.95 (p,  $J = 6.8$  Hz, 1H), 1.23 (d,  $J = 6.8$  Hz, 3H), 1.01 (d,  $J = 6.8$  Hz, 3H);  $^{13}\text{C}$  NMR (126 MHz,  $\text{CDCl}_3$ )  $\delta$  173.0, 147.5, 143.2, 141.9, 134.6, 132.4, 130.6, 129.7, 128.7, 128.6, 128.3, 128.1, 127.5, 126.7, 126.6, 125.1, 30.9, 24.1, 23.9. HRMS (ESI) calcd. for  $\text{C}_{24}\text{H}_{22}\text{NaO}_2$   $[\text{M}+\text{Na}]^+$ : 365.1517, found: 365.1513.  $[\alpha]_{\text{D}}^{20} = -25.4$  ( $c = 0.25$ ,  $\text{CHCl}_3$ ), The ee value determined by corresponding methyl ester, HPLC chiralcel AD-H column (10% isopropanol in hexanes, 1.0 mL/min,  $\lambda = 254$  nm),  $t_{\text{R}} = 5.1$  min (major), 6.0 min (minor), 99% ee.

**(E)-3-phenyl-2-(2-((E)-styryl)naphthalen-1-yl)acrylic acid (CCA 4)**

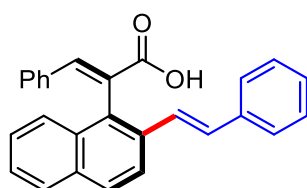

The product **CCA 4** was purified with silica gel chromatography (DCM/MeOH = 100:1) as a white solid (72 % yield).  $^1\text{H}$  NMR (500 MHz,  $\text{CDCl}_3$ )  $\delta$  8.32 (s, 1H), 7.90 - 7.86 (m, 2H), 7.82 (d,  $J = 8.0$  Hz, 1H), 7.75 (d,  $J = 8.3$  Hz, 1H), 7.43 - 7.31 (m, 4H), 7.31 - 7.24 (m, 3H), 7.21 (d,  $J = 17.7$  Hz, 1H), 7.14 - 7.08 (m, 2H), 7.01 (t,  $J = 7.7$  Hz, 2H), 6.97 (d,  $J = 7.7$  Hz, 2H);  $^{13}\text{C}$  NMR (126 MHz,  $\text{CDCl}_3$ )  $\delta$  173.0, 144.8, 137.3, 133.9, 133.12, 133.09, 131.9, 131.2, 130.8, 130.6, 123.0, 128.8, 128.6, 128.5, 128.3, 127.7, 127.0, 126.7, 126.1, 126.0, 125.2, 122.9.  $\text{C}_{27}\text{H}_{20}\text{NaO}_2$   $[\text{M}+\text{Na}]^+$ : 399.1361 found: 399.1355.  $[\alpha]_{\text{D}}^{20} = -42.9$  ( $c = 0.25$ ,  $\text{CHCl}_3$ ), HPLC chiralcel AS-H column (10% isopropanol in hexanes, 1.0 mL/min,  $\lambda = 254$  nm),  $t_{\text{R}} = 7.5$  min (major), 12.3 min (minor), 99% ee.

**(E)-2-(2,3-dimethyl-6-((E)-styryl)phenyl)-3-phenylacrylic acid (CCA 5)**

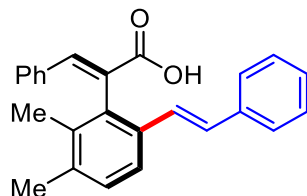

The product **CCA 5** was purified with silica gel chromatography (DCM/MeOH = 100:1) as a white solid (64 % yield).  $^1\text{H}$  NMR (500 MHz,  $\text{CDCl}_3$ )  $\delta$  8.09 (s, 1H), 7.52 (d,  $J = 8.0$  Hz, 1H), 7.32 (d,  $J = 7.6$  Hz, 2H), 7.22 (dt,  $J = 14.3, 7.4$  Hz, 4H), 7.14 (q,  $J = 7.1$  Hz, 3H), 7.07 - 6.99 (m, 3H), 6.91 (d,  $J = 16.1$  Hz, 1H), 2.29 (s, 3H), 2.04 (s, 3H);  $^{13}\text{C}$

NMR (126 MHz, CDCl<sub>3</sub>)  $\delta$  172.9, 143.1, 137.7, 136.7, 135.1, 134.4, 134.0, 133.8, 130.5, 130.2, 129.9, 129.6, 129.4, 128.6, 128.5, 127.4, 126.6, 122.9, 20.7, 16.4. HRMS (ESI) calcd. for C<sub>25</sub>H<sub>22</sub>O<sub>2</sub>Na[M+Na]<sup>+</sup>: 377.1517, found: 377.1510.  $[\alpha]_D^{20} = -61.0$  (c = 0.25, CHCl<sub>3</sub>), HPLC chiralcel As-H column (10% isopropanol in hexanes, 1.0 mL/min,  $\lambda = 254$  nm),  $t_R = 5.3$  min (major), 8.2 min (minor), 99% ee.

**(E)-2-(2-isopropyl-6-((E)-styryl)phenyl)-3-phenylacrylic acid (CCA 6)**

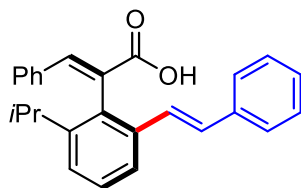

The product **CCA 6** was purified with silica gel chromatography (DCM/MeOH = 100:1) as a white solid (76 % yield). <sup>1</sup>H NMR (400 MHz, CDCl<sub>3</sub>)  $\delta$  8.10 (s, 1H), 7.60 (dd,  $J = 7.7, 1.1$  Hz, 1H), 7.42 (t,  $J = 7.8$  Hz, 1H), 7.31 (td,  $J = 7.4, 1.4$  Hz, 3H), 7.28 – 7.17 (m, 2H), 7.20 – 7.05 (m, 5H), 7.02 (d,  $J = 7.3$  Hz, 2H), 6.94 (d,  $J = 16.1$  Hz, 1H), 2.89 (p,  $J = 6.8$  Hz, 1H), 1.14 (d,  $J = 6.8$  Hz, 3H), 0.87 (d,  $J = 6.8$  Hz, 3H); <sup>13</sup>C NMR (126 MHz, CDCl<sub>3</sub>)  $\delta$  173.1, 147.5, 143.6, 137.5, 136.2, 134.4, 132.7, 130.7, 130.5, 123.0, 128.90, 128.85, 128.6, 128.5, 127.5, 126.6, 125.4, 123.3, 30.9, 24.0, 23.9. HRMS (ESI) calcd. for C<sub>26</sub>H<sub>24</sub>O<sub>2</sub>Na[M+Na]<sup>+</sup>: 391.1674, found: 391.1670.  $[\alpha]_D^{20} = -33.6$  (c = 0.25, CHCl<sub>3</sub>), HPLC chiralcel AS-H column (10% isopropanol in hexanes, 1.0 mL/min,  $\lambda = 254$  nm),  $t_R = 5.5$  min (major), 6.5 min (minor), >99% ee.

## X-ray Crystallographic Data of 5aa

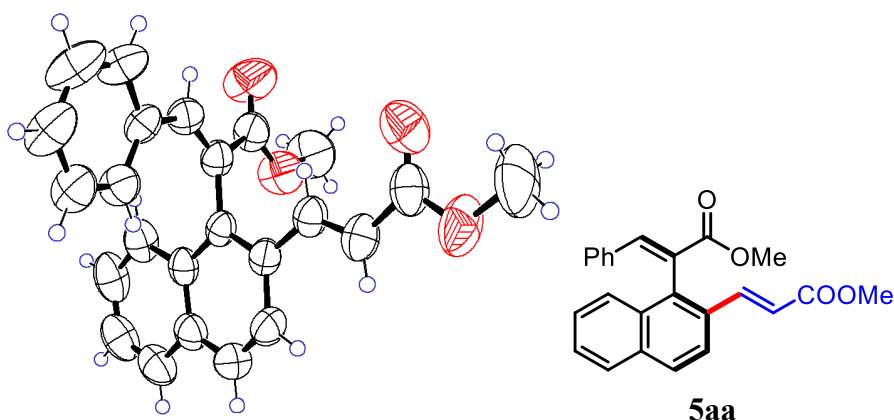

|                                             |                                                               |
|---------------------------------------------|---------------------------------------------------------------|
| Empirical formula                           | C <sub>24</sub> H <sub>20</sub> O <sub>4</sub>                |
| Formula weight                              | 372.40                                                        |
| Temperature/K                               | 293(2)                                                        |
| Crystal system                              | orthorhombic                                                  |
| Space group                                 | P2 <sub>1</sub> 2 <sub>1</sub> 2 <sub>1</sub>                 |
| a/Å                                         | 8.99240(10)                                                   |
| b/Å                                         | 19.5139(2)                                                    |
| c/Å                                         | 23.2425(2)                                                    |
| α/°                                         | 90                                                            |
| β/°                                         | 90                                                            |
| γ/°                                         | 90                                                            |
| Volume/Å <sup>3</sup>                       | 4078.52(7)                                                    |
| Z                                           | 8                                                             |
| ρ <sub>calc</sub> /cm <sup>3</sup>          | 1.213                                                         |
| μ/mm <sup>-1</sup>                          | 0.664                                                         |
| F(000)                                      | 1568.0                                                        |
| Crystal size/mm <sup>3</sup>                | ? × ? × ?                                                     |
| Radiation                                   | CuKα (λ = 1.54184)                                            |
| 2θ range for data collection/°              | 7.608 to 146.386                                              |
| Index ranges                                | -11 ≤ h ≤ 10, -24 ≤ k ≤ 24, -28 ≤ l ≤ 28                      |
| Reflections collected                       | 42944                                                         |
| Independent reflections                     | 8078 [R <sub>int</sub> = 0.0341, R <sub>sigma</sub> = 0.0182] |
| Data/restraints/parameters                  | 8078/10/509                                                   |
| Goodness-of-fit on F <sup>2</sup>           | 1.578                                                         |
| Final R indexes [I ≥ 2σ (I)]                | R <sub>1</sub> = 0.0670, wR <sub>2</sub> = 0.1995             |
| Final R indexes [all data]                  | R <sub>1</sub> = 0.0754, wR <sub>2</sub> = 0.2077             |
| Largest diff. peak/hole / e Å <sup>-3</sup> | 0.40/-0.24                                                    |
| Flack parameter                             | -0.07(8)                                                      |

## X-ray Crystallographic Data of CCA 1

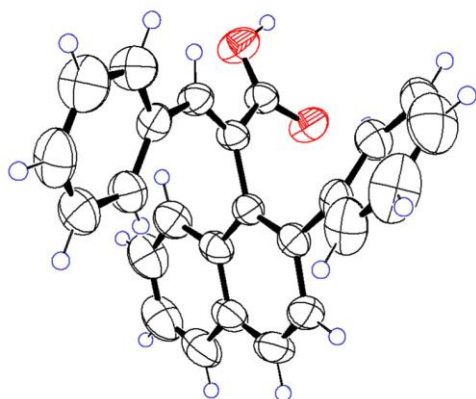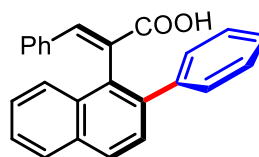

CCA1

|                                             |                                                               |
|---------------------------------------------|---------------------------------------------------------------|
| Empirical formula                           | C <sub>25</sub> H <sub>18</sub> O <sub>2</sub>                |
| Formula weight                              | 350.39                                                        |
| Temperature/K                               | 293(2)                                                        |
| Crystal system                              | triclinic                                                     |
| Space group                                 | P1                                                            |
| a/Å                                         | 8.6935(2)                                                     |
| b/Å                                         | 11.1218(2)                                                    |
| c/Å                                         | 12.2142(2)                                                    |
| α/°                                         | 87.3760(10)                                                   |
| β/°                                         | 70.785(2)                                                     |
| γ/°                                         | 81.6190(10)                                                   |
| Volume/Å <sup>3</sup>                       | 1103.26(4)                                                    |
| Z                                           | 2                                                             |
| ρ <sub>calc</sub> /cm <sup>3</sup>          | 1.055                                                         |
| μ/mm <sup>-1</sup>                          | 0.520                                                         |
| F(000)                                      | 368.0                                                         |
| Crystal size/mm <sup>3</sup>                | 0.4 × 0.4 × 0.2                                               |
| Radiation                                   | CuKα (λ = 1.54184)                                            |
| 2θ range for data collection/°              | 7.666 to 139.896                                              |
| Index ranges                                | -10 ≤ h ≤ 10, -13 ≤ k ≤ 13, -14 ≤ l ≤ 14                      |
| Reflections collected                       | 36949                                                         |
| Independent reflections                     | 7868 [R <sub>int</sub> = 0.0270, R <sub>sigma</sub> = 0.0128] |
| Data/restraints/parameters                  | 7868/3/489                                                    |
| Goodness-of-fit on F <sup>2</sup>           | 1.079                                                         |
| Final R indexes [I ≥ 2σ (I)]                | R <sub>1</sub> = 0.0603, wR <sub>2</sub> = 0.1552             |
| Final R indexes [all data]                  | R <sub>1</sub> = 0.0607, wR <sub>2</sub> = 0.1562             |
| Largest diff. peak/hole / e Å <sup>-3</sup> | 0.27/-0.47                                                    |
| Flack parameter                             | 0.11(6)                                                       |

## References

- (1) T. Matsuda, Y. Sakurai, *Eur. J. Org. Chem.*, 2013, **2013**, 4219.
- (2) S. Zhang, Q.-J. Yao, G. Liao, X. Li, H. Li, H.-M. Chen, X. Hong, B.-F. Shi, *ACS Catal.*, 2019, **9**, 1956.
- (3) Y. Su, H. Zhou, J. Chen, J. Xu, X. Wu, A. Lin, H. Yao, *Org. Lett.*, 2014, **16**, 4884.
- (4) S. Fukagawa, Y. Kato, R. Tanaka, M. Kojima, T. Yoshino, S. Matsunaga, *Angew. Chem. Int. Ed.*, 2019, **58**, 1153.
- (5) L.-T. Huang, S. Fukagawa, M. Kojima, T. Yoshino, S. Matsunaga, *Org. Lett.*, 2020, **22**, 8256.



## 4. NMR Data

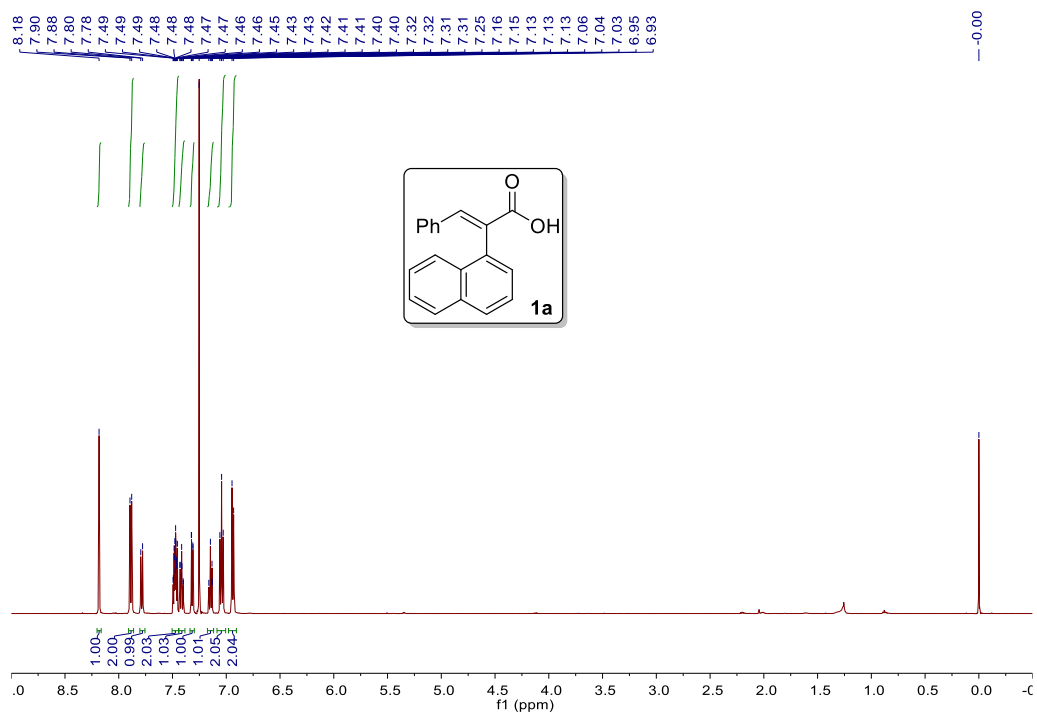

<sup>1</sup>H NMR Spectrum of **1a** (CDCl<sub>3</sub>, 500 MHz)

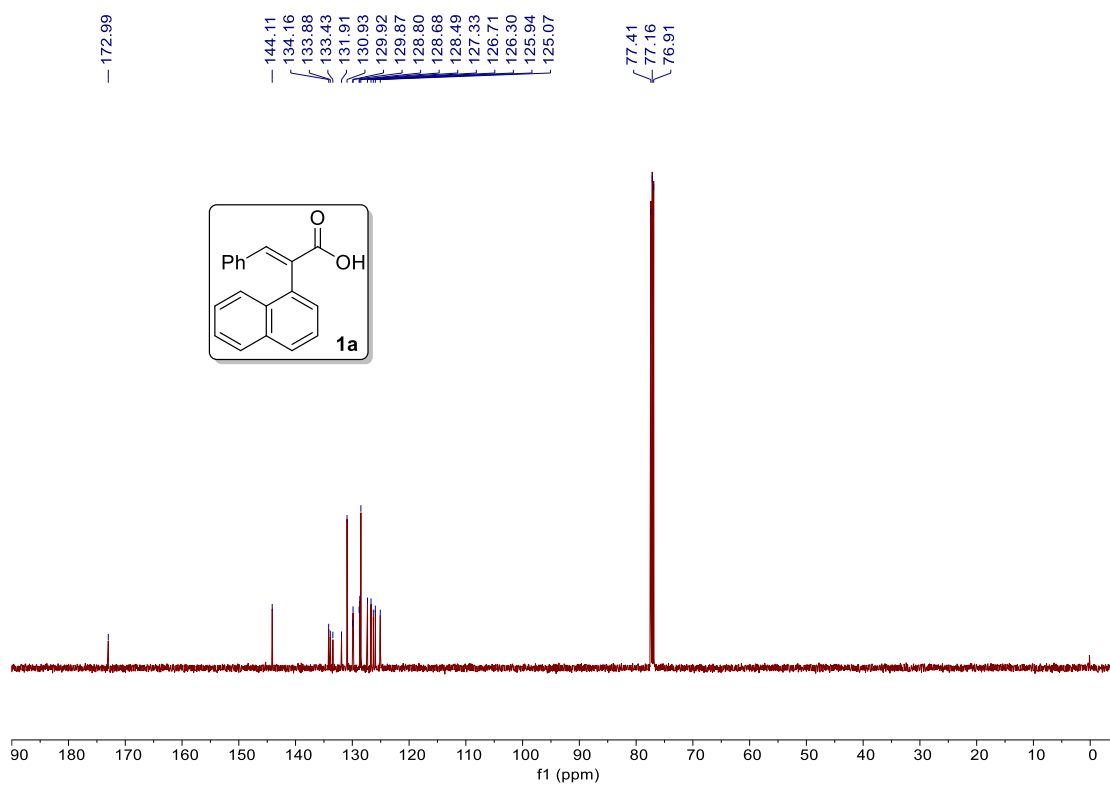

<sup>13</sup>C NMR Spectrum of **1a** (CDCl<sub>3</sub>, 126 MHz)

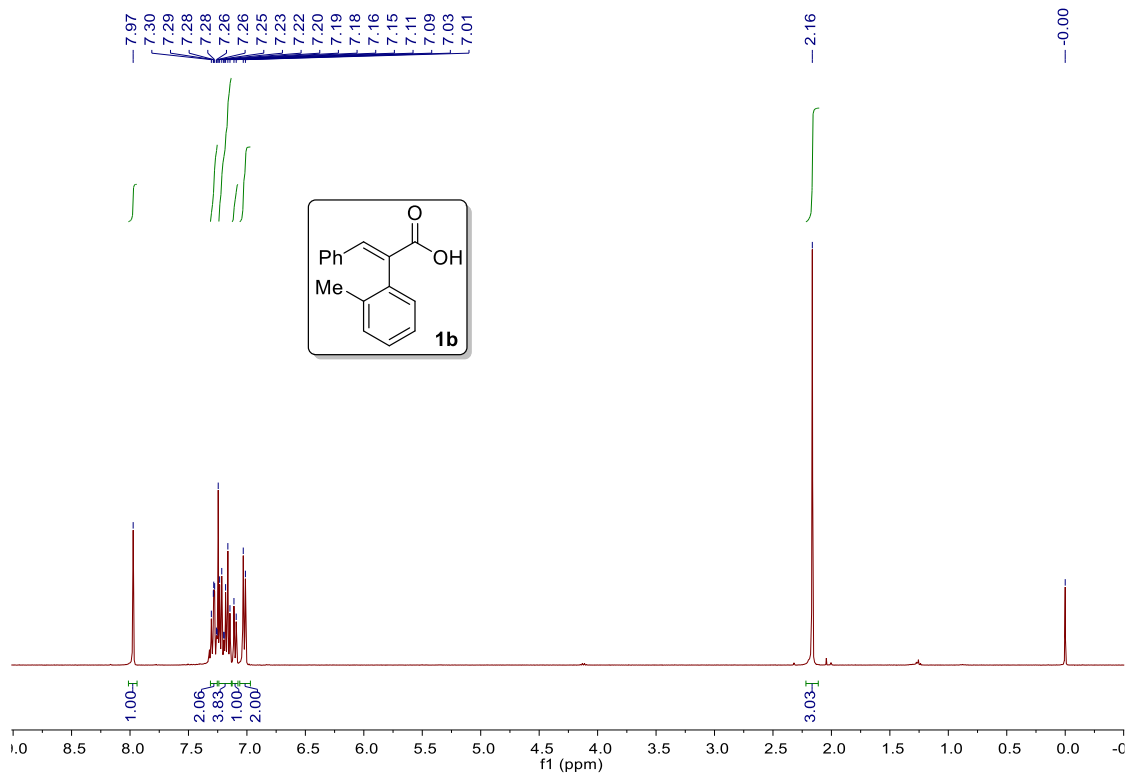

**<sup>1</sup>H NMR Spectrum of **1b** (CDCl<sub>3</sub>, 400 MHz)**

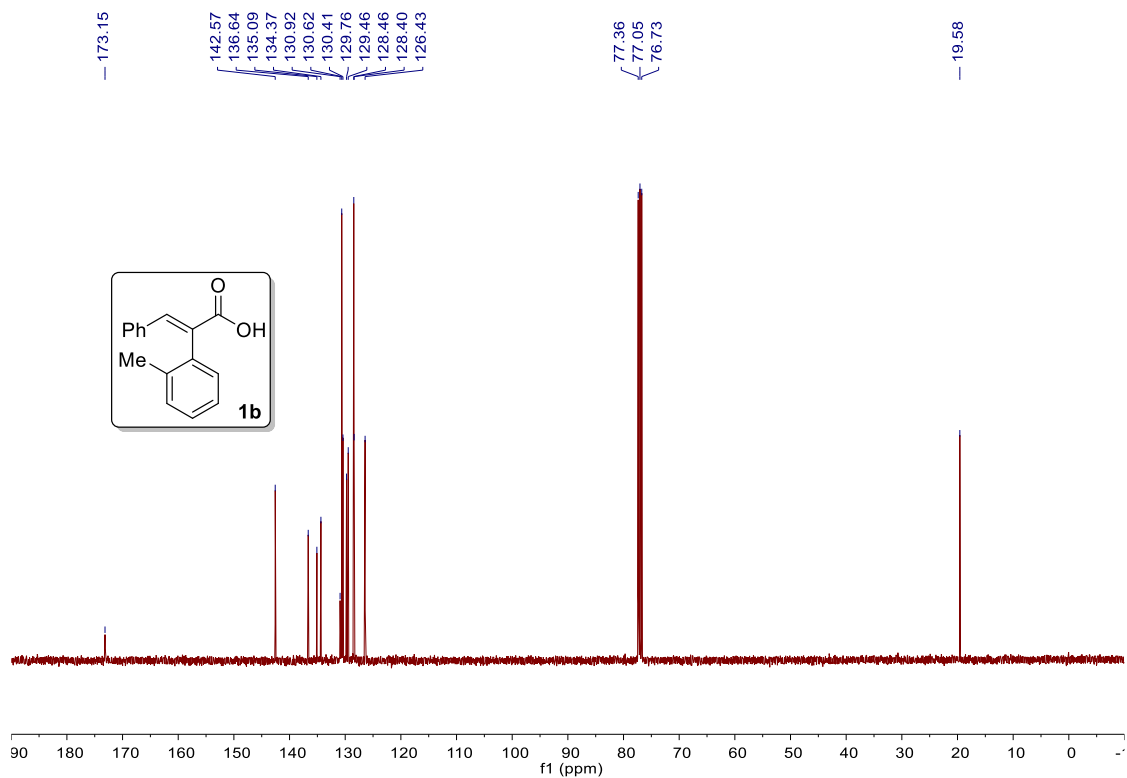

**<sup>13</sup>C NMR Spectrum of **1b** (CDCl<sub>3</sub>, 101 MHz)**

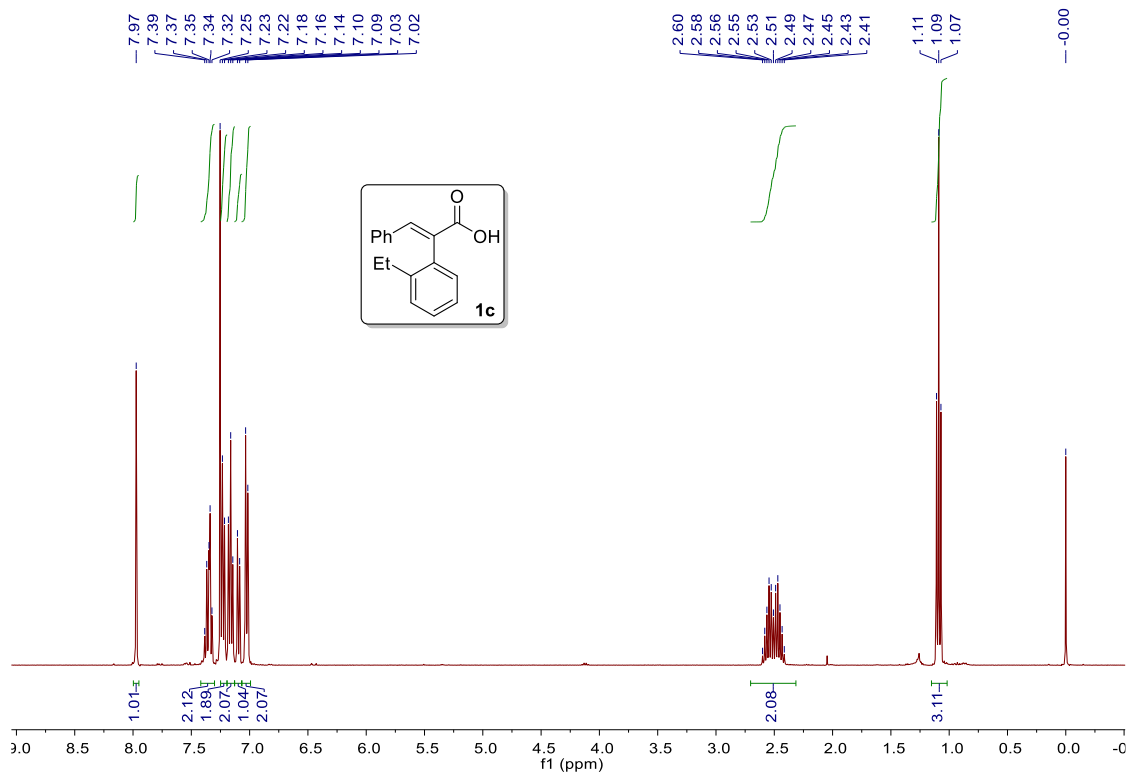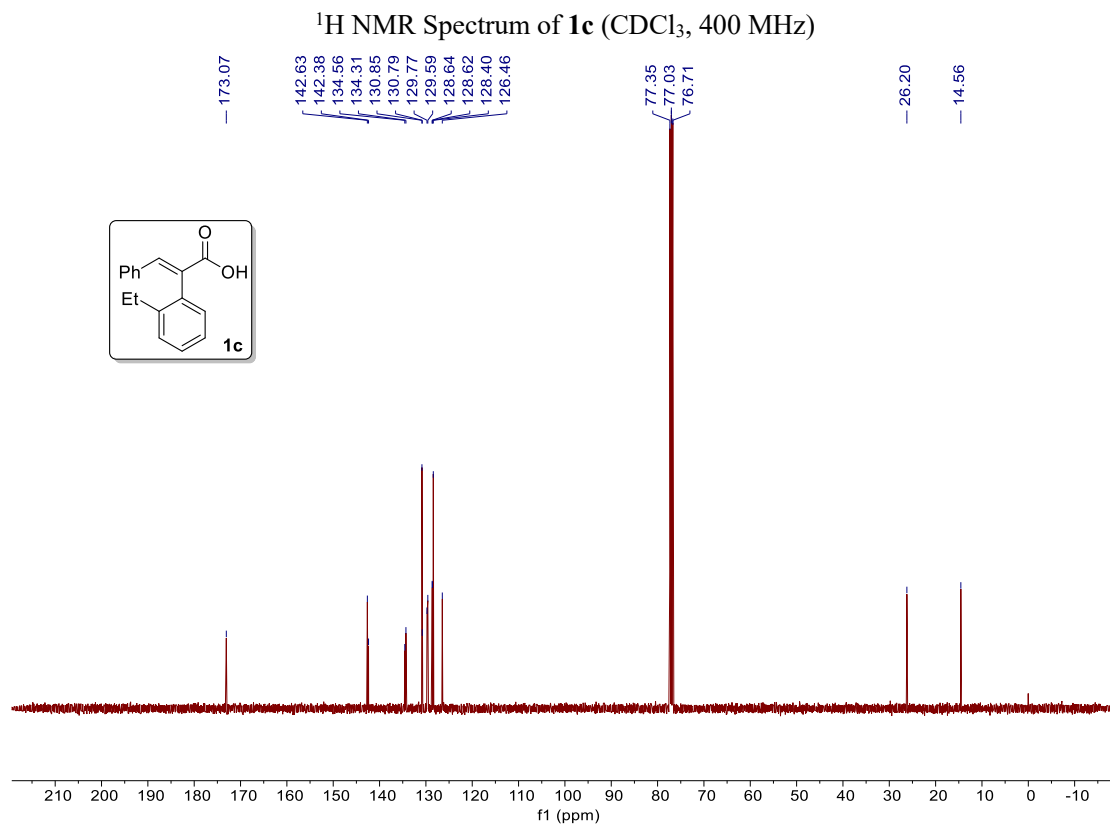

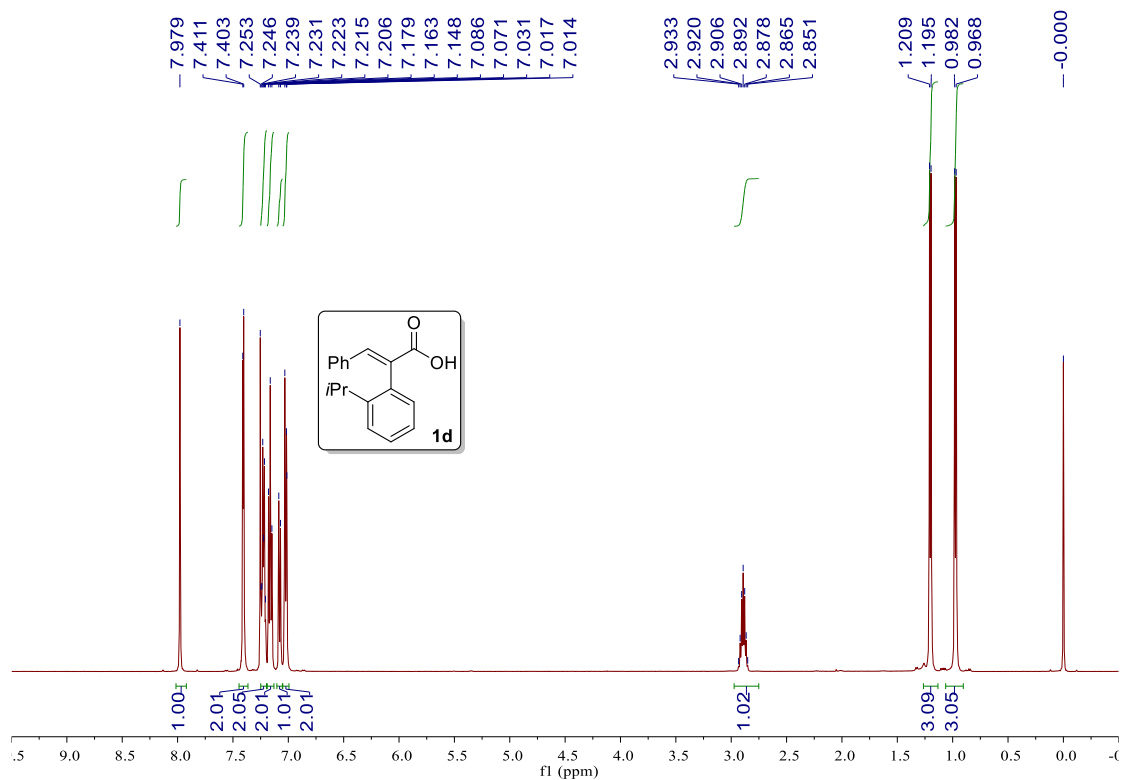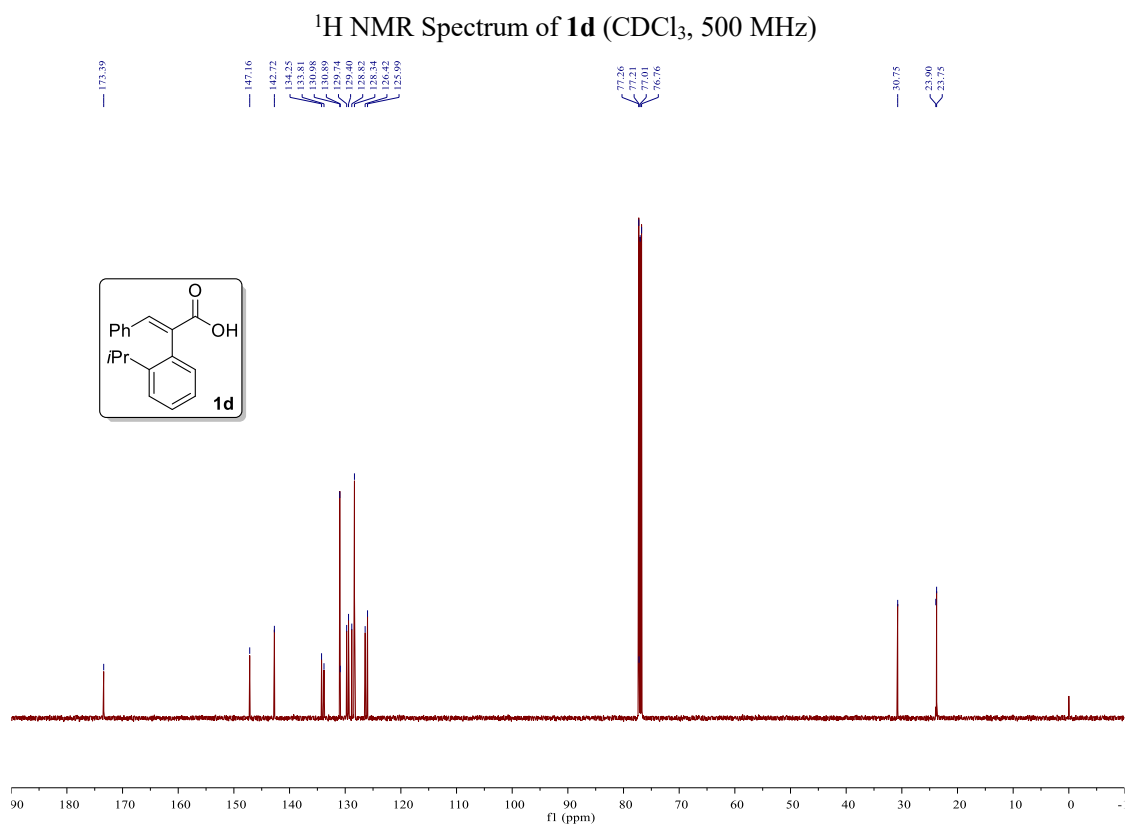

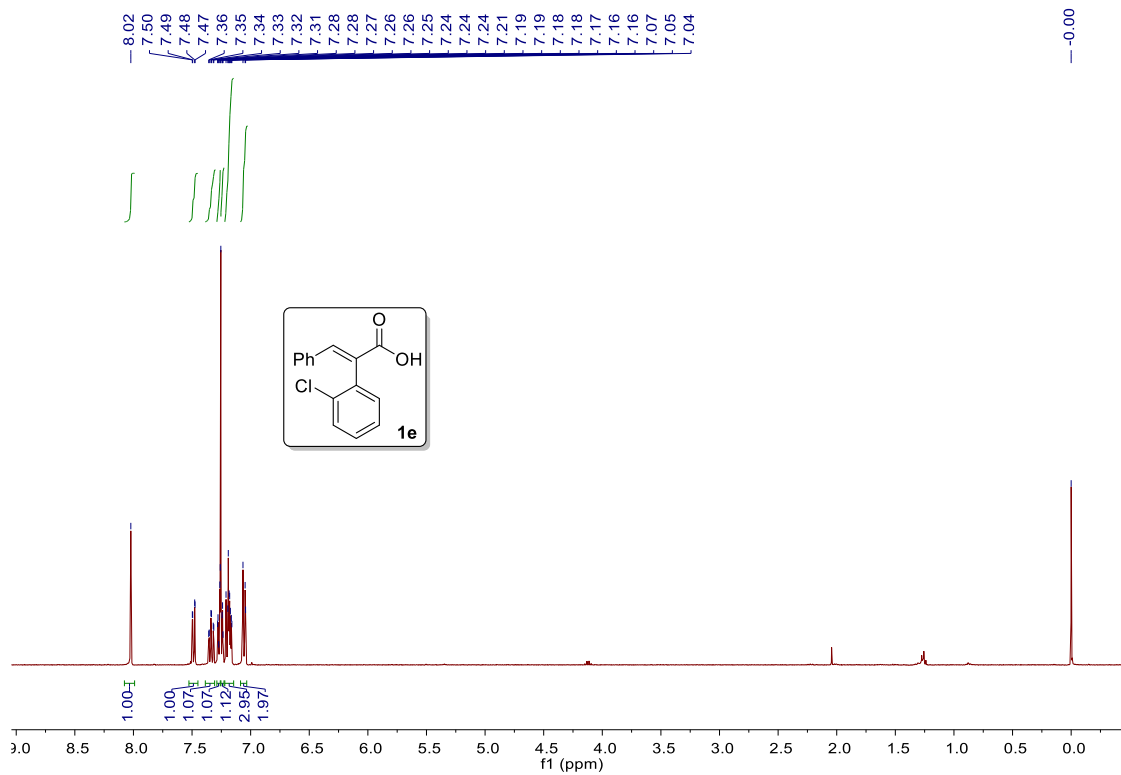

<sup>1</sup>H NMR Spectrum of **1e** (CDCl<sub>3</sub>, 400 MHz)

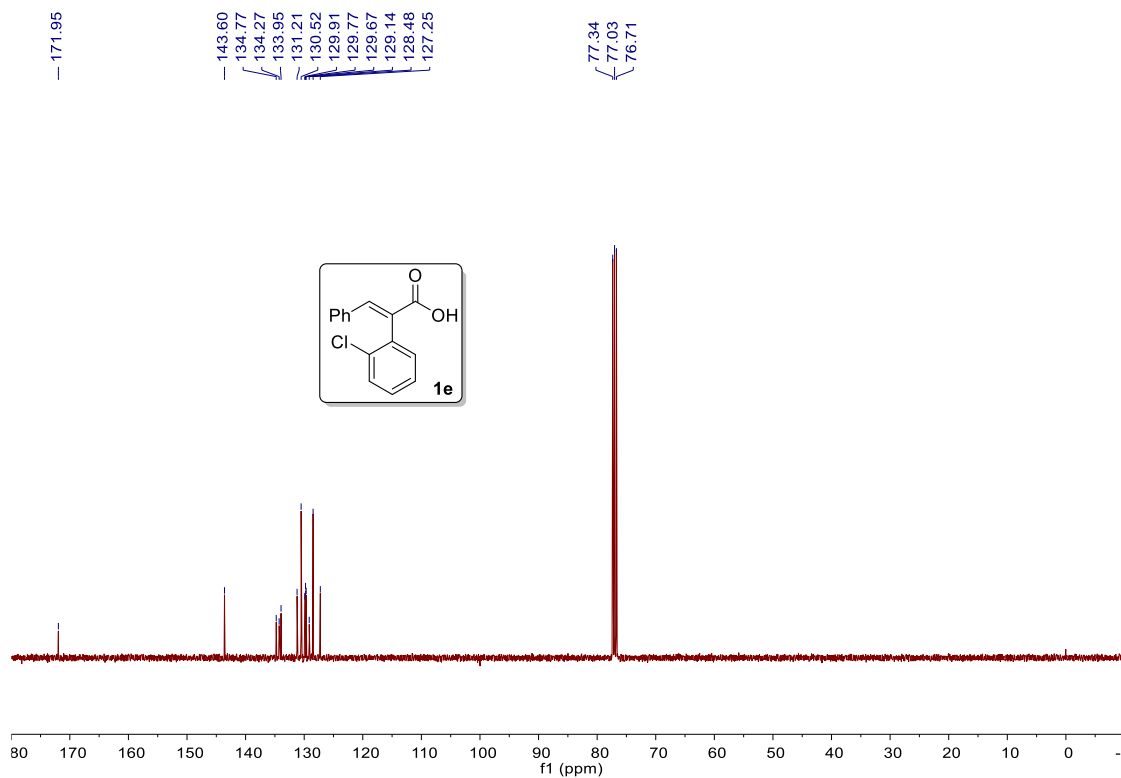

<sup>13</sup>C NMR Spectrum of **1e** (CDCl<sub>3</sub>, 101 MHz)

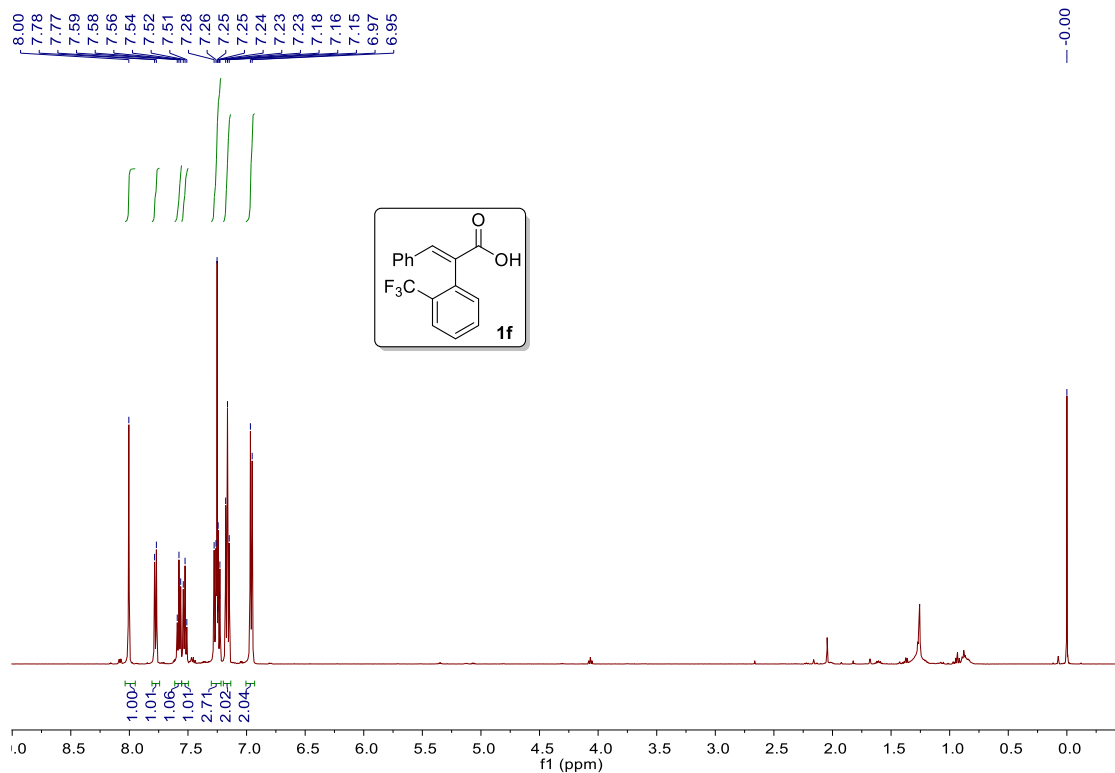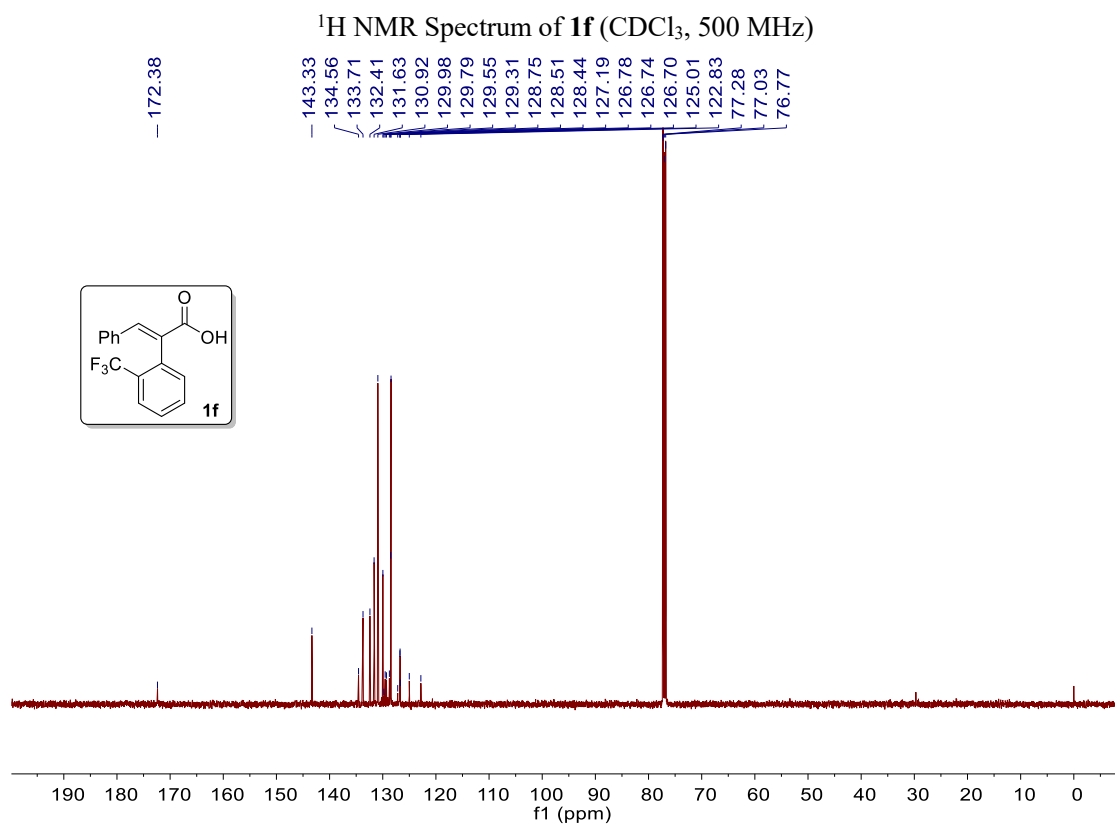

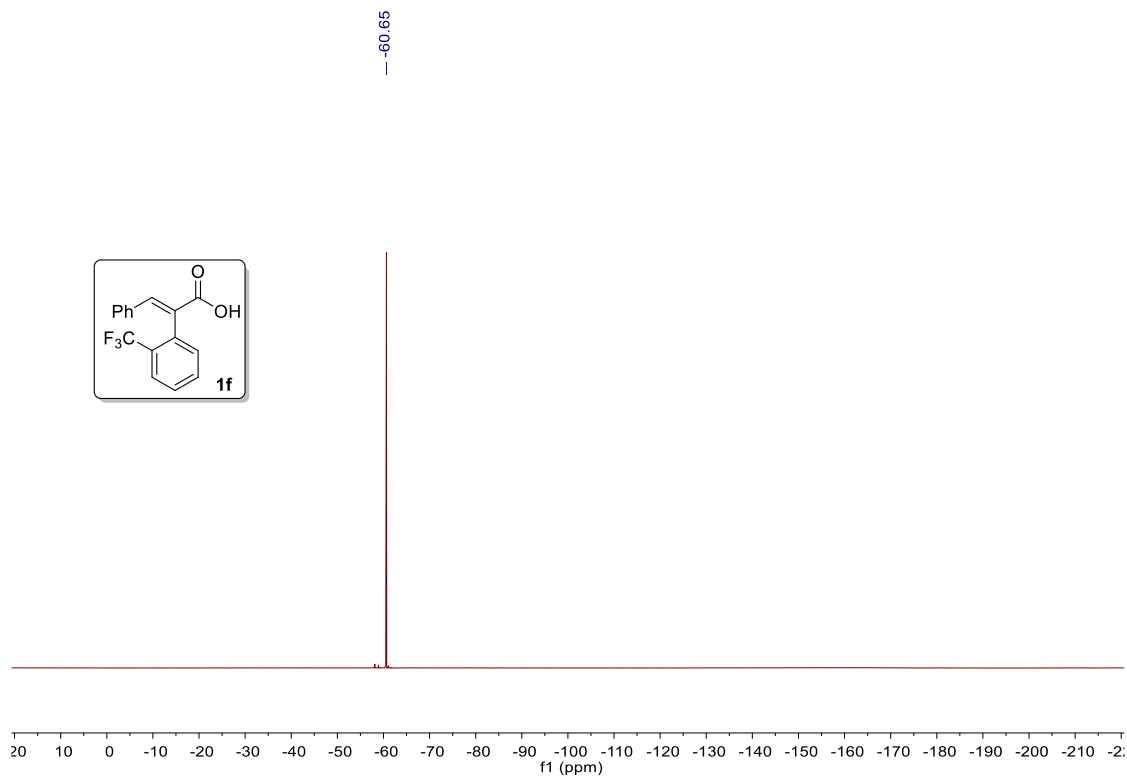

<sup>19</sup>F NMR Spectrum of **1f** (471 MHz, CDCl<sub>3</sub>)

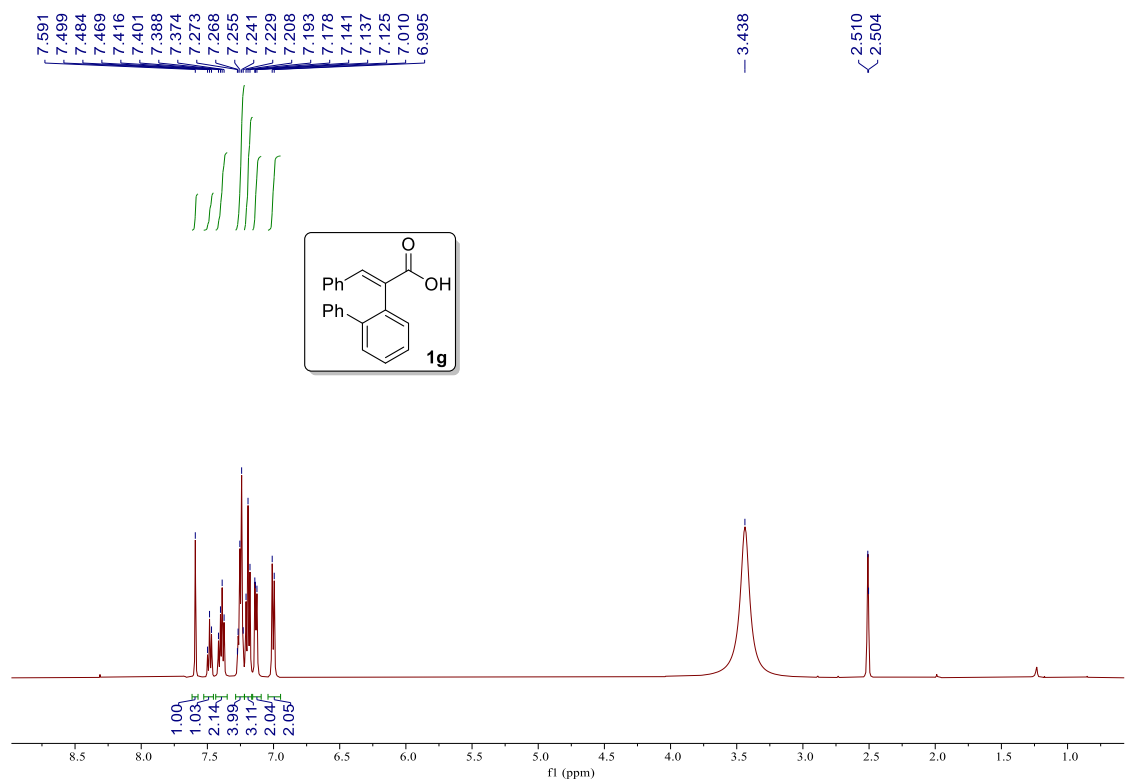

<sup>1</sup>H NMR Spectrum of **1g** (500 MHz, DMSO-*d*<sub>6</sub>)

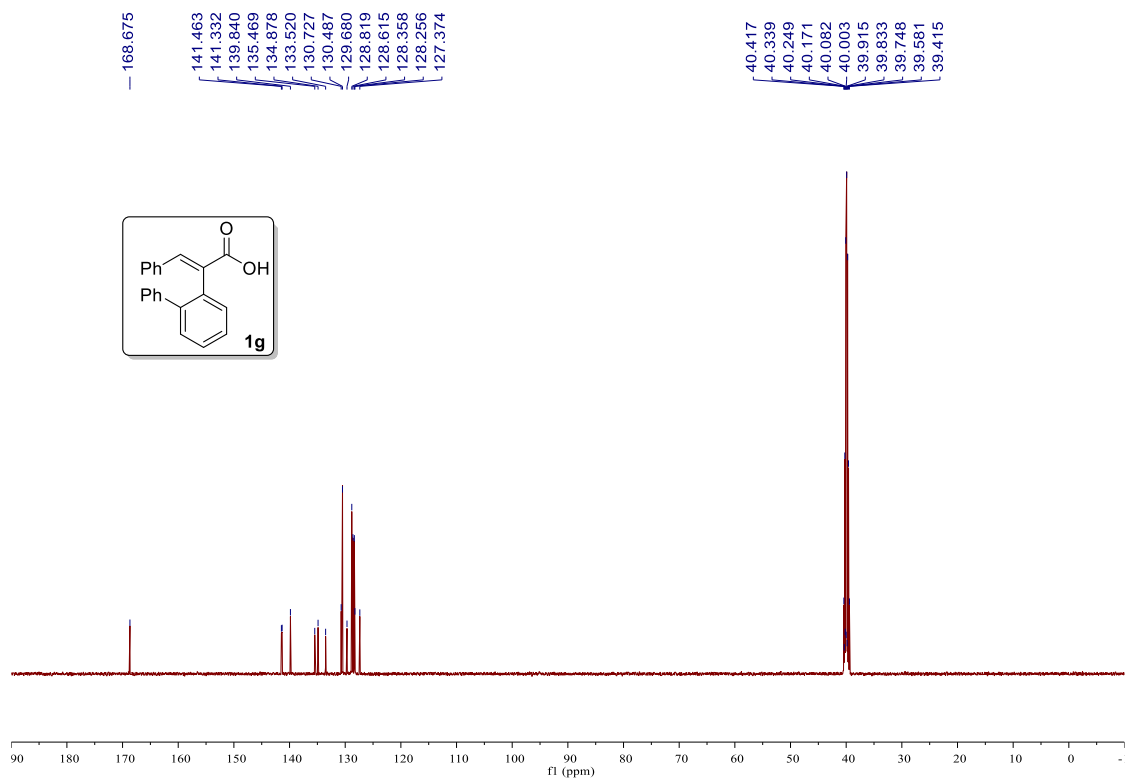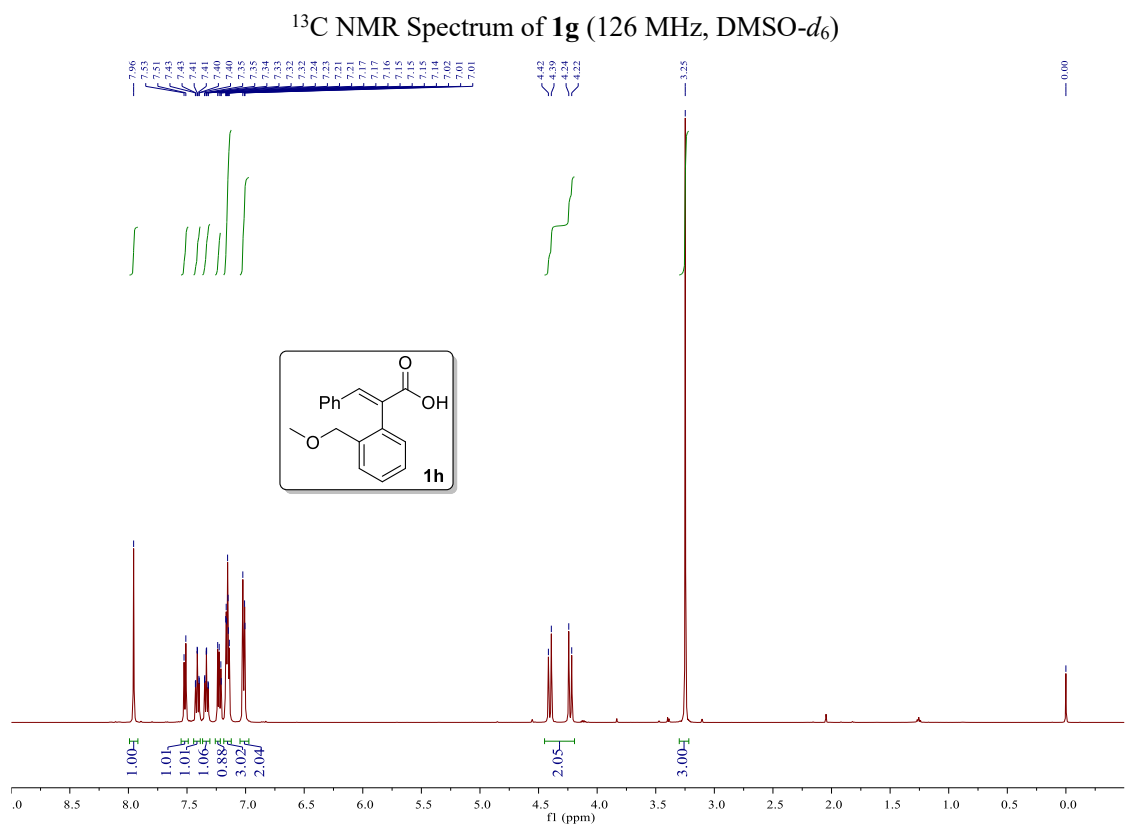



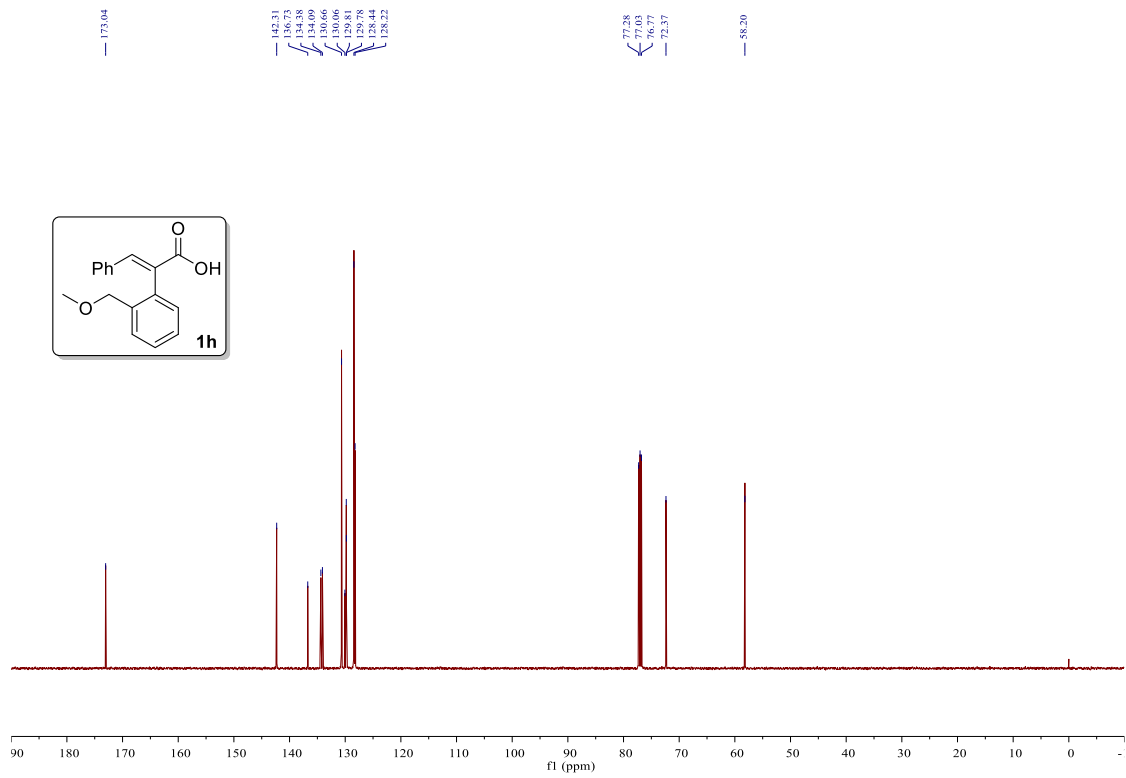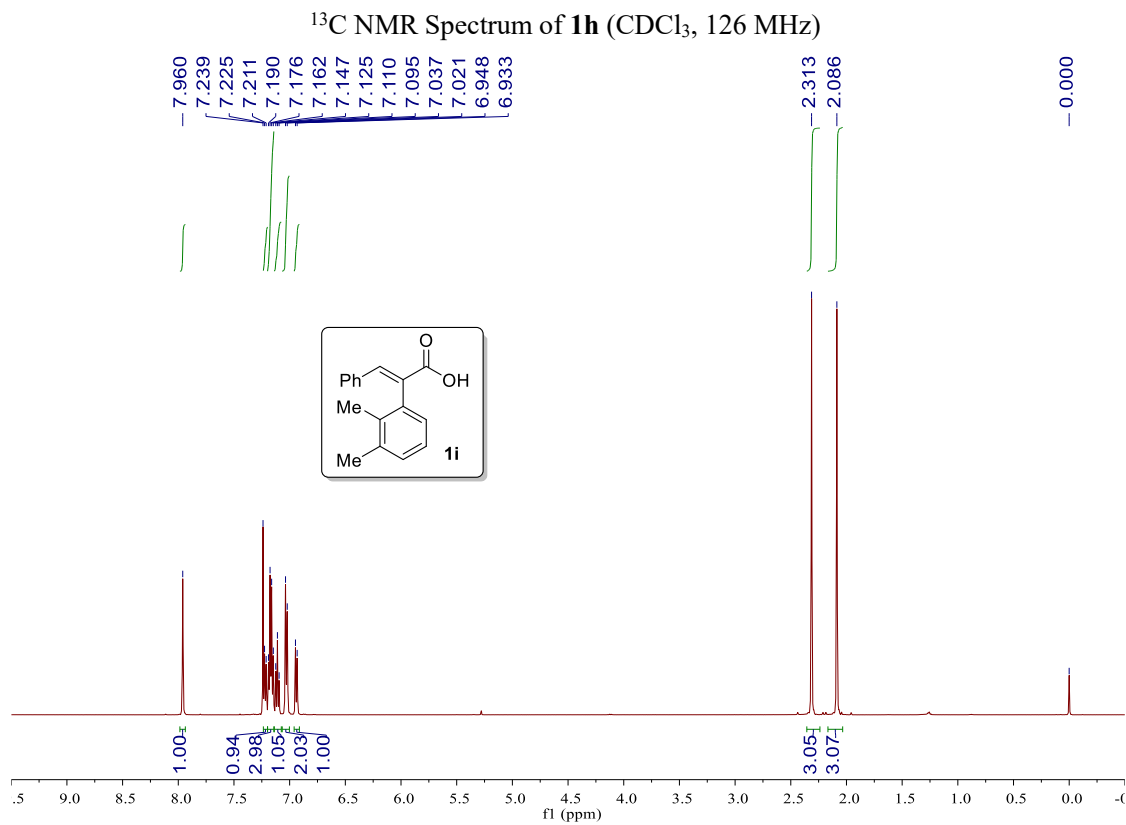

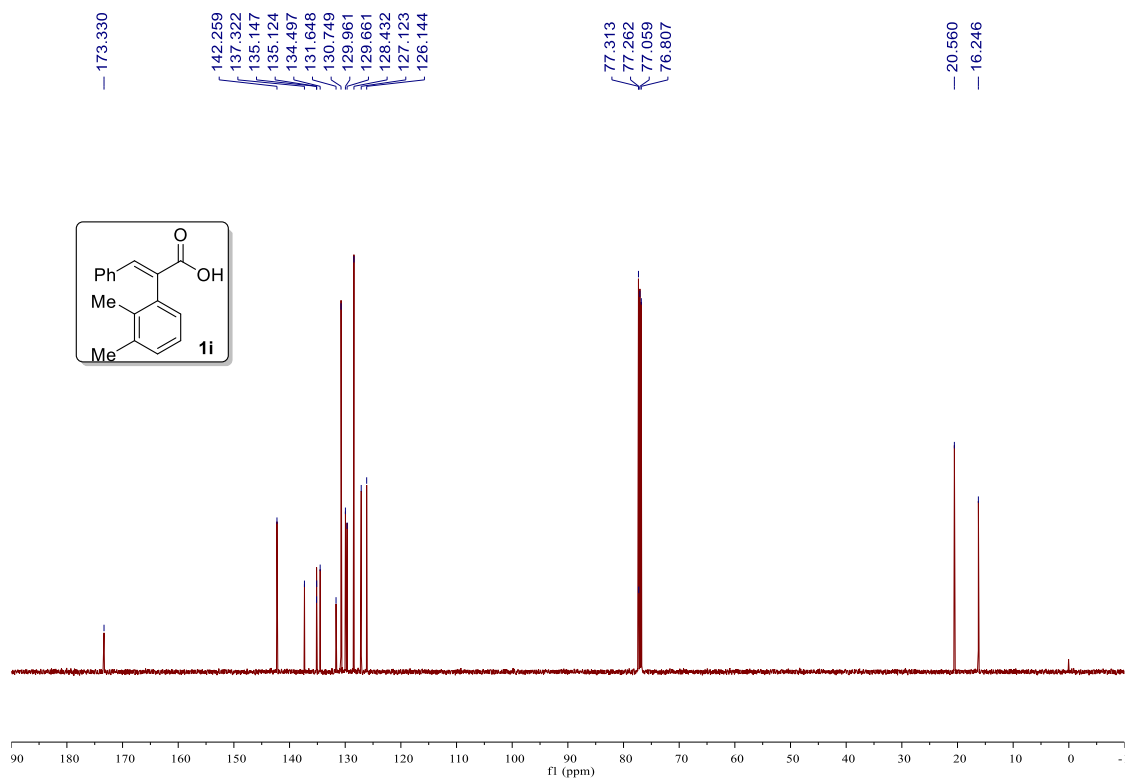

<sup>13</sup>C NMR Spectrum of **1i** (CDCl<sub>3</sub>, 126 MHz)

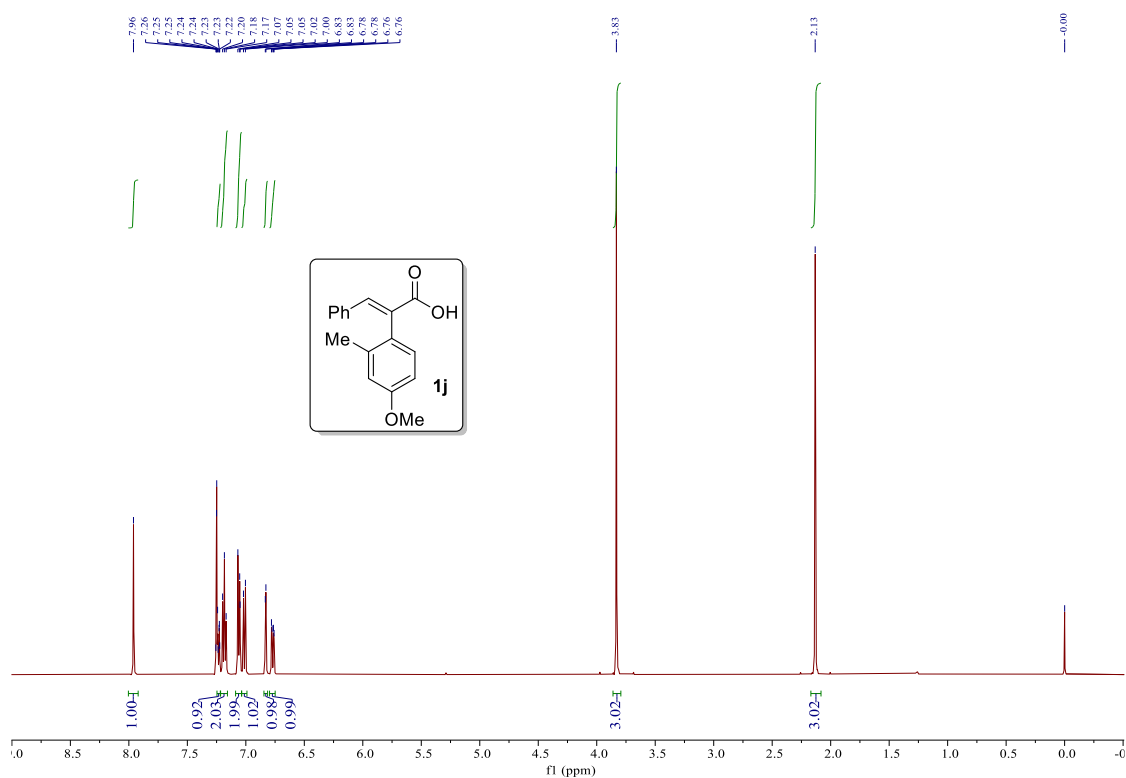

<sup>1</sup>H NMR Spectrum of **1j** (CDCl<sub>3</sub>, 500 MHz)

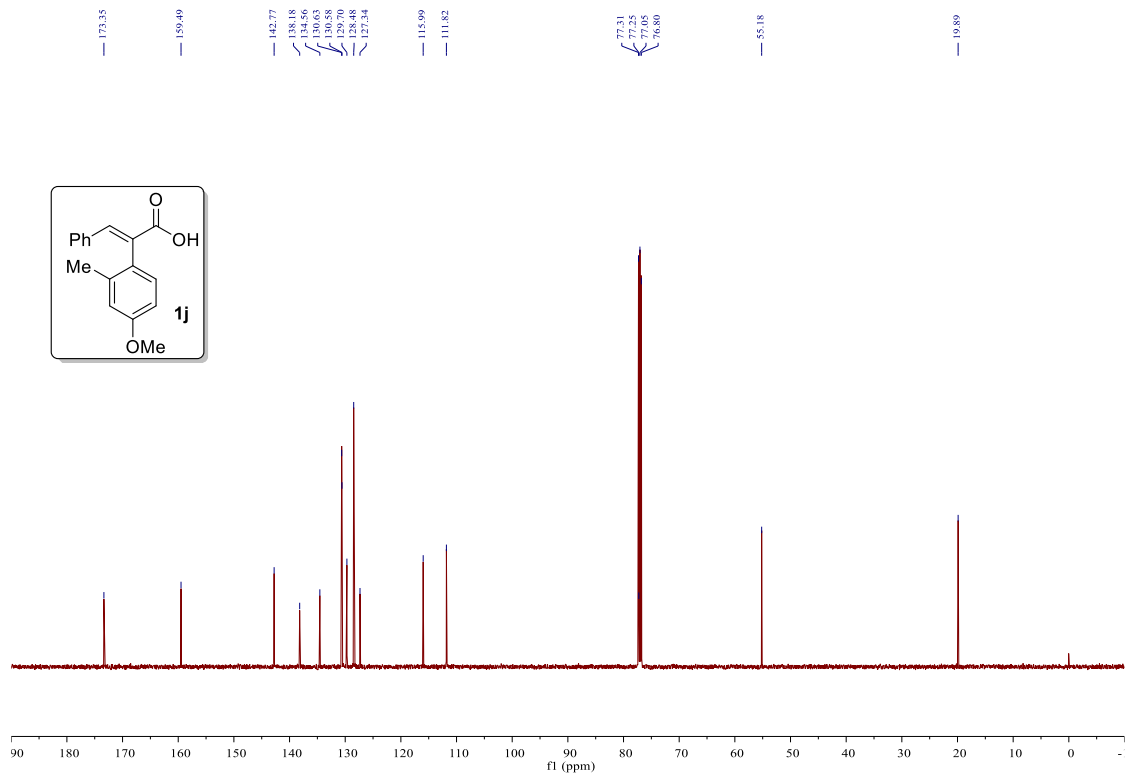

<sup>13</sup>C NMR Spectrum of **1j** (CDCl<sub>3</sub>, 126 MHz)

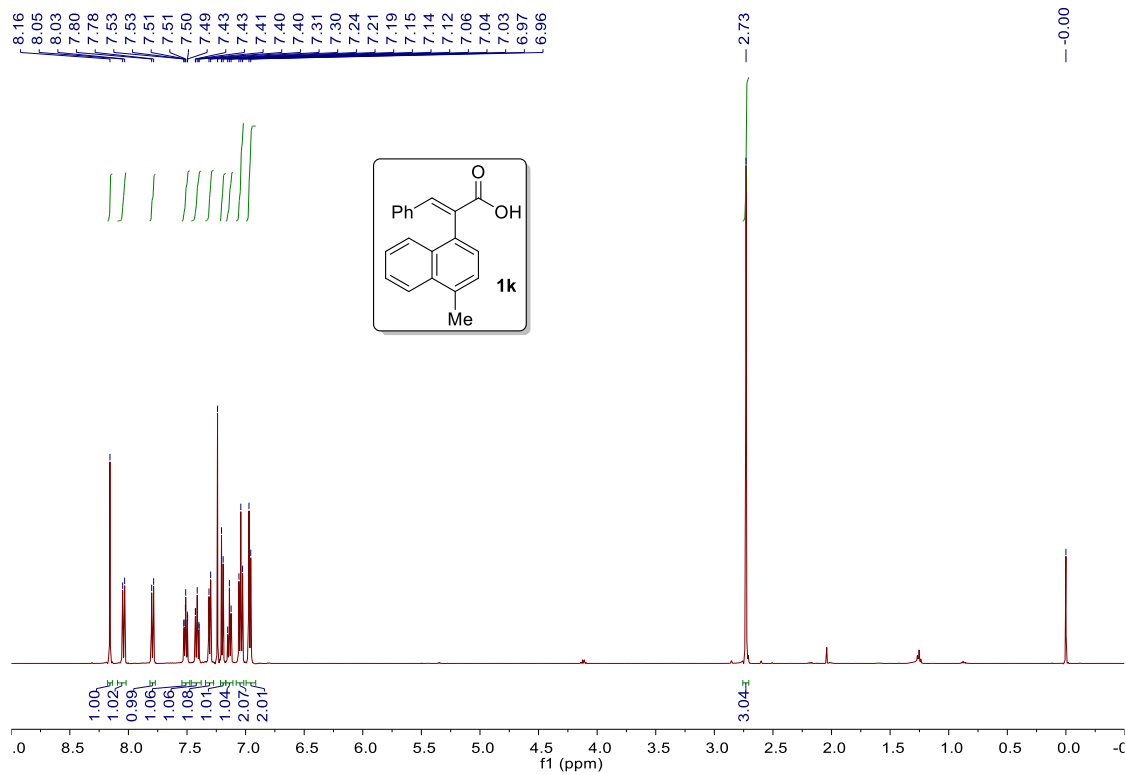

<sup>1</sup>H NMR Spectrum of **1k** (CDCl<sub>3</sub>, 500 MHz)

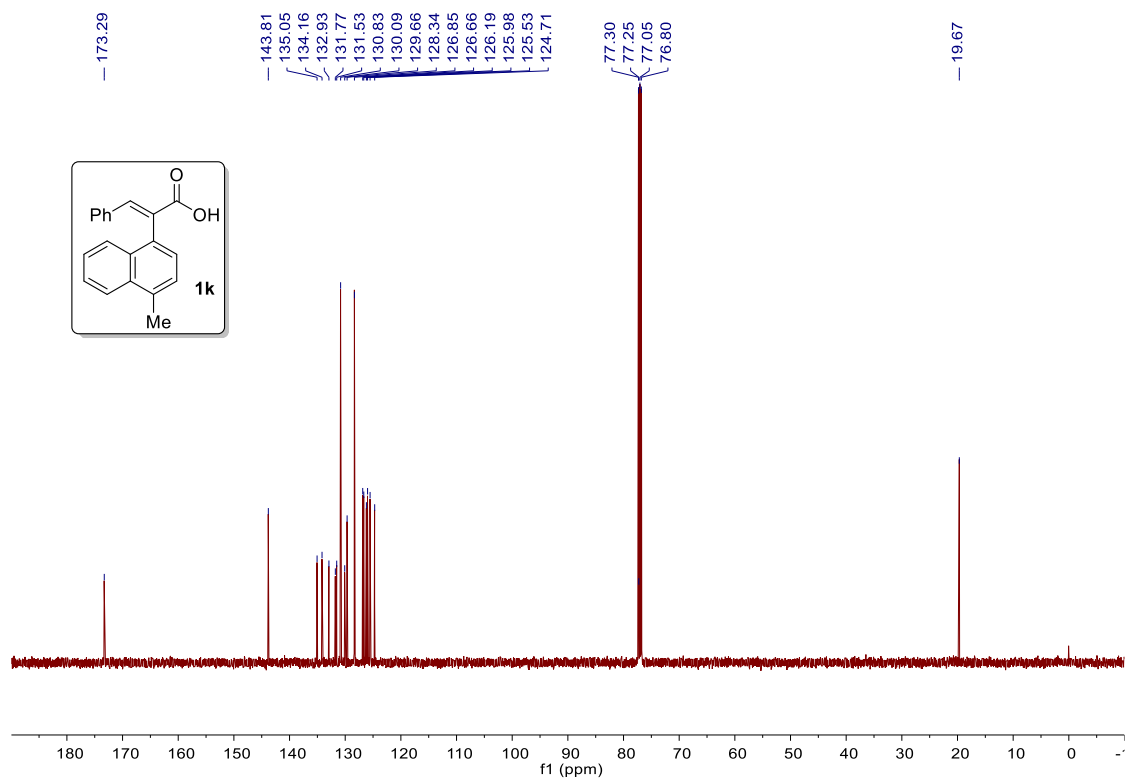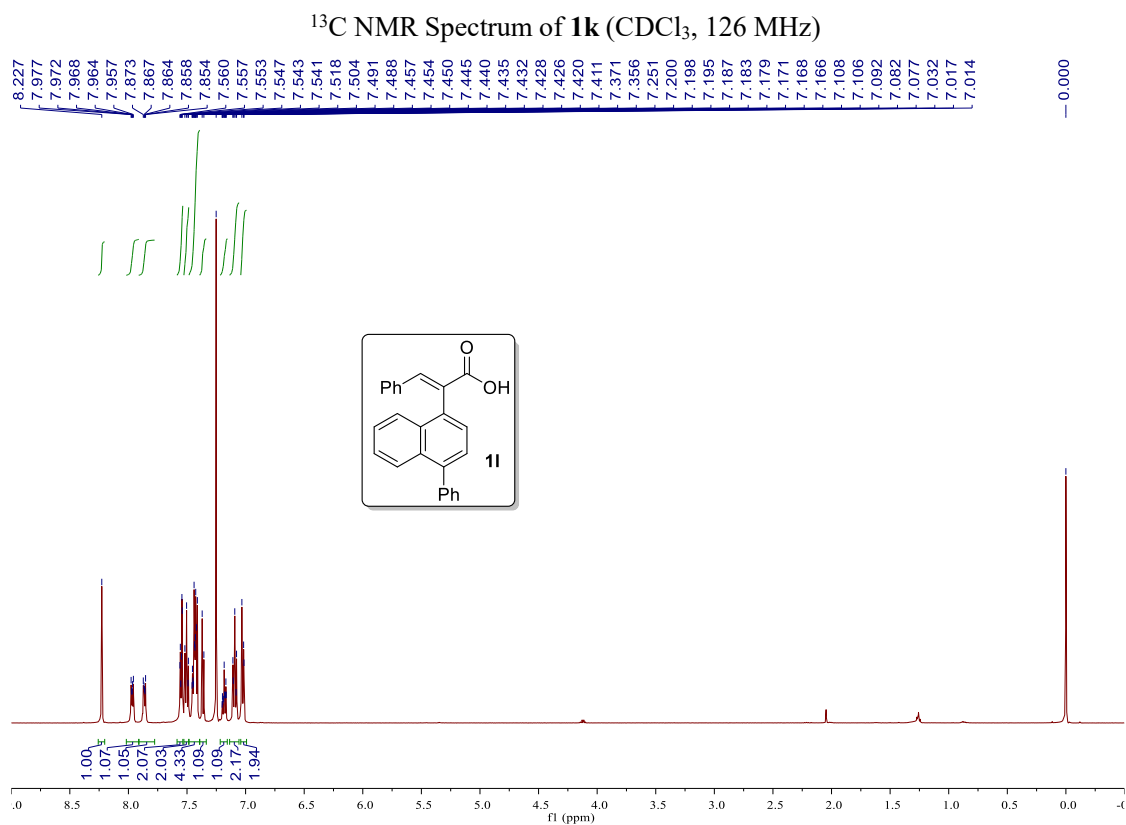

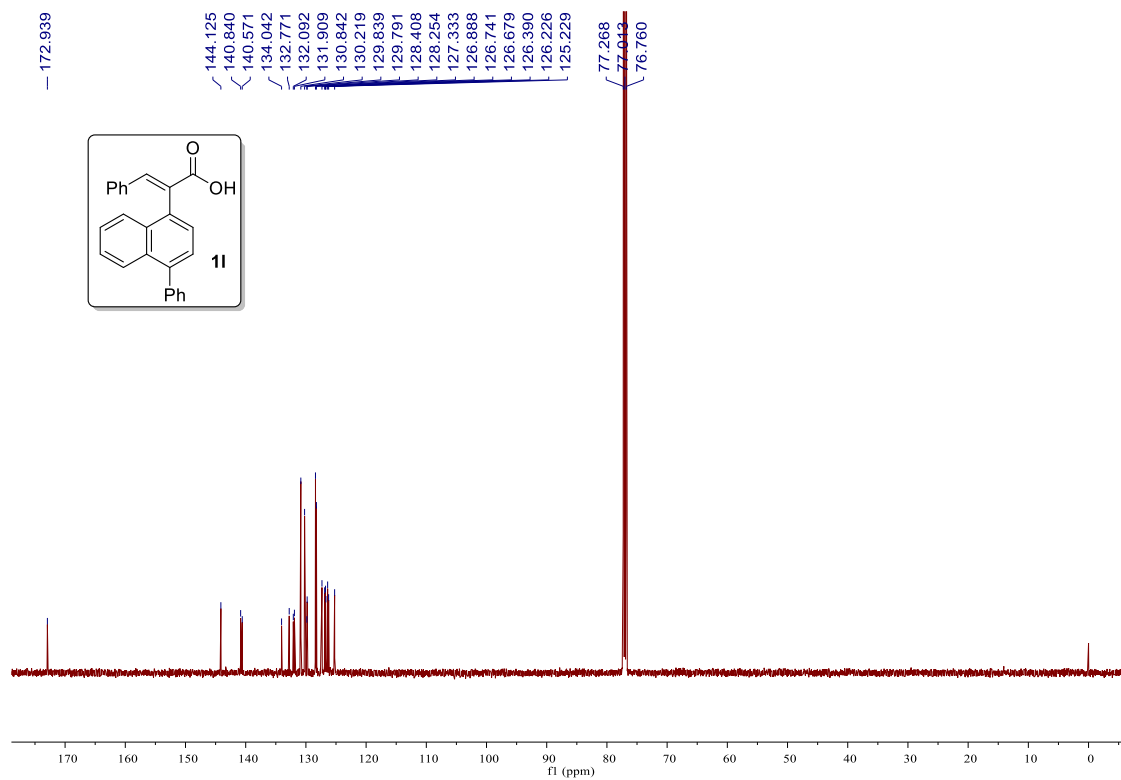

<sup>13</sup>C NMR Spectrum of **1l** (CDCl<sub>3</sub>, 126 MHz)

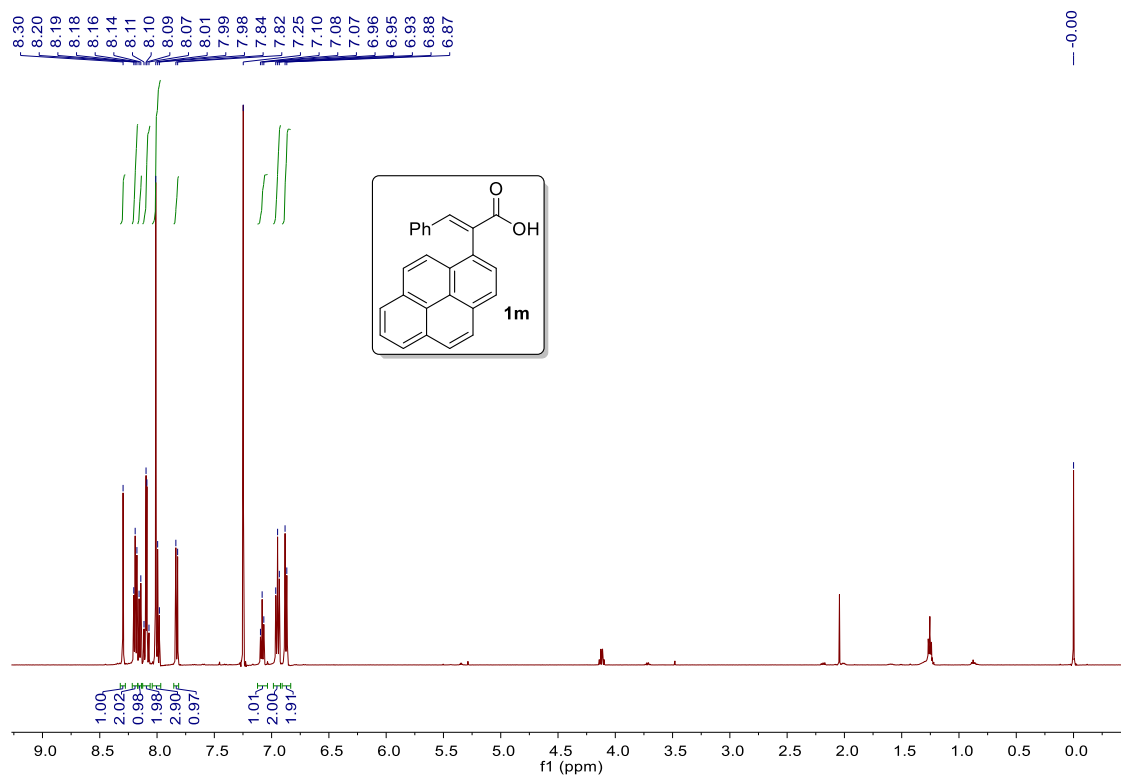

<sup>1</sup>H NMR Spectrum of **1m** (CDCl<sub>3</sub>, 500 MHz)

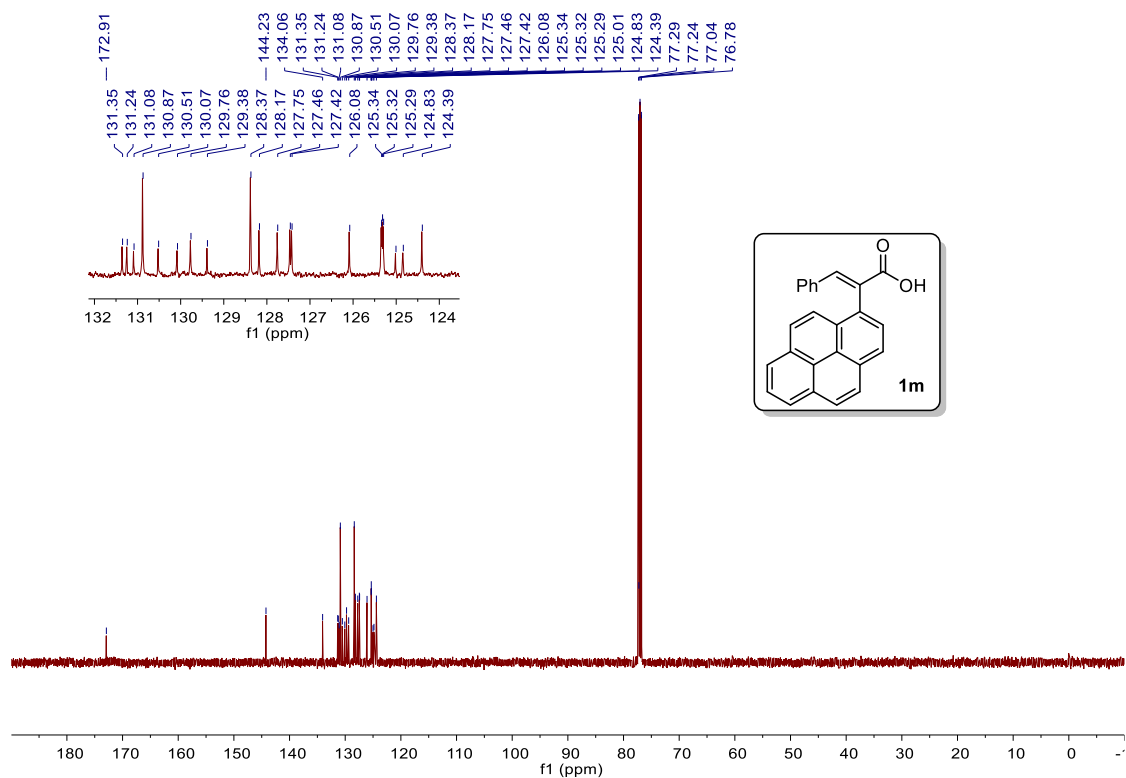

<sup>13</sup>C NMR Spectrum of **1m** (CDCl<sub>3</sub>, 126 MHz) <sup>1</sup>H NMR Spectrum of **1n** (CDCl<sub>3</sub>, 500 MHz) <sup>13</sup>C NMR Spectrum of **1n** (CDCl<sub>3</sub>, 126 MHz)

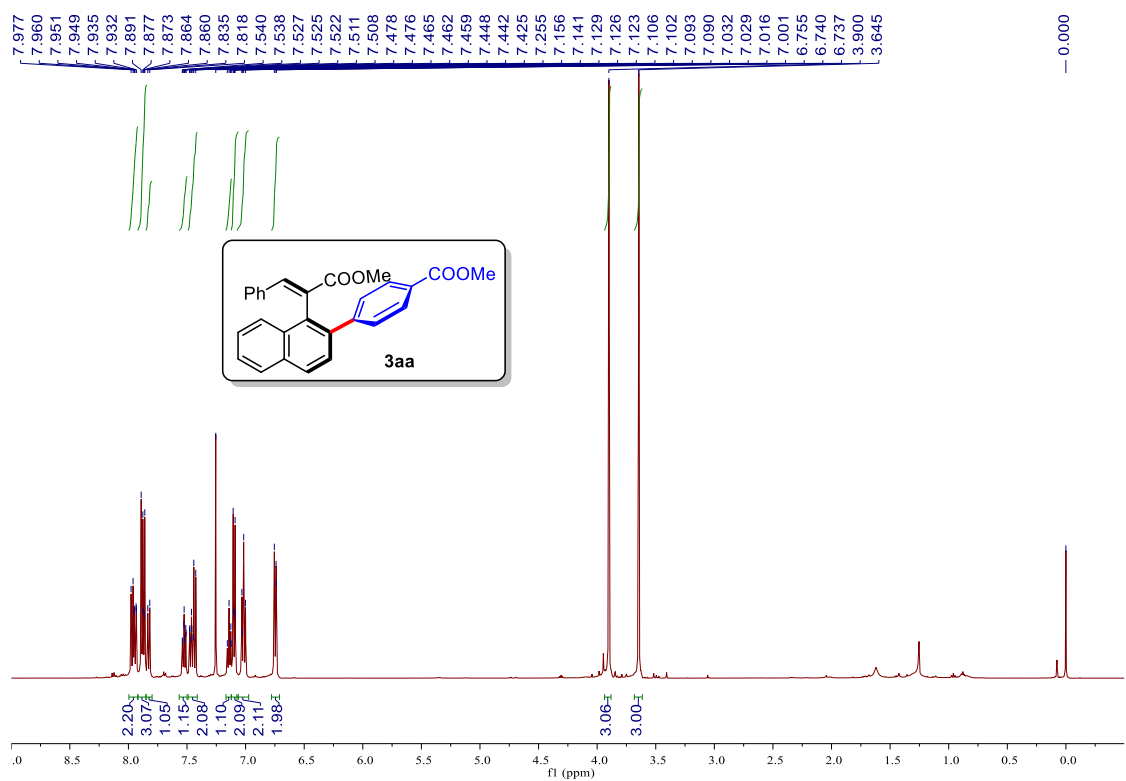

<sup>1</sup>H NMR Spectrum of **3aa** (CDCl<sub>3</sub>, 500 MHz)

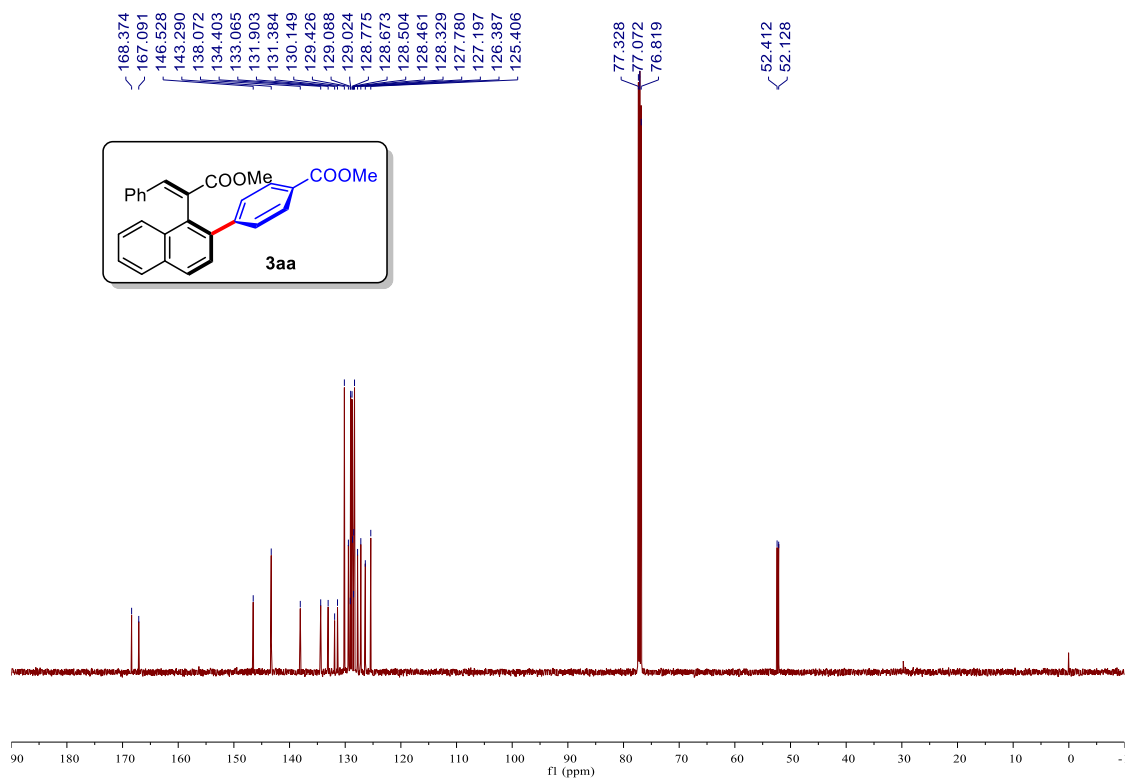

<sup>13</sup>C NMR Spectrum of **3aa** (CDCl<sub>3</sub>, 126 MHz)

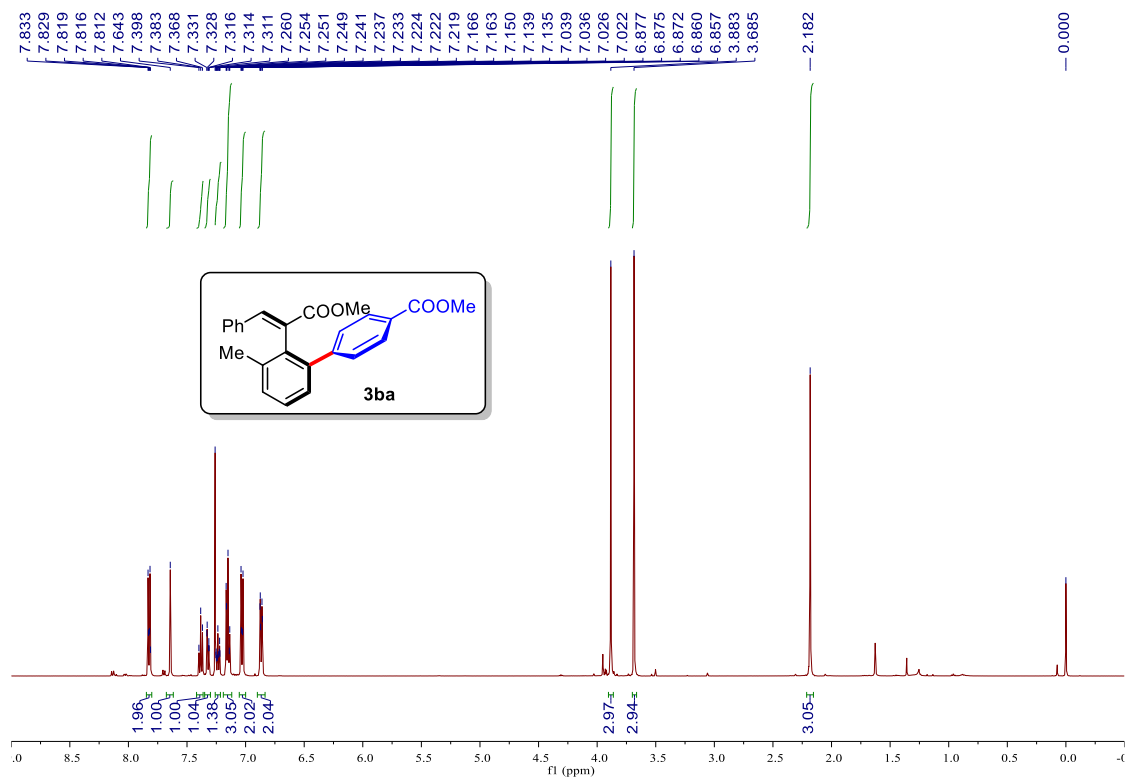

<sup>1</sup>H NMR Spectrum of **3ba** (CDCl<sub>3</sub>, 500 MHz)

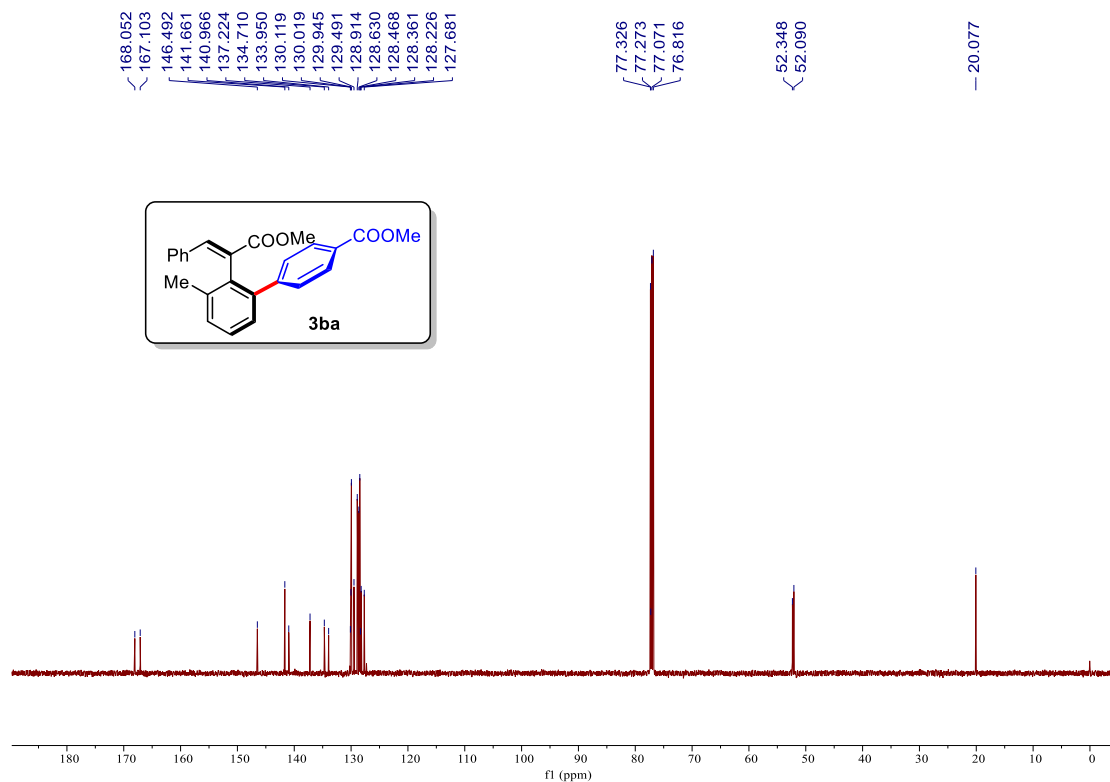

<sup>13</sup>C NMR Spectrum of **3ba** (CDCl<sub>3</sub>, 126 MHz)

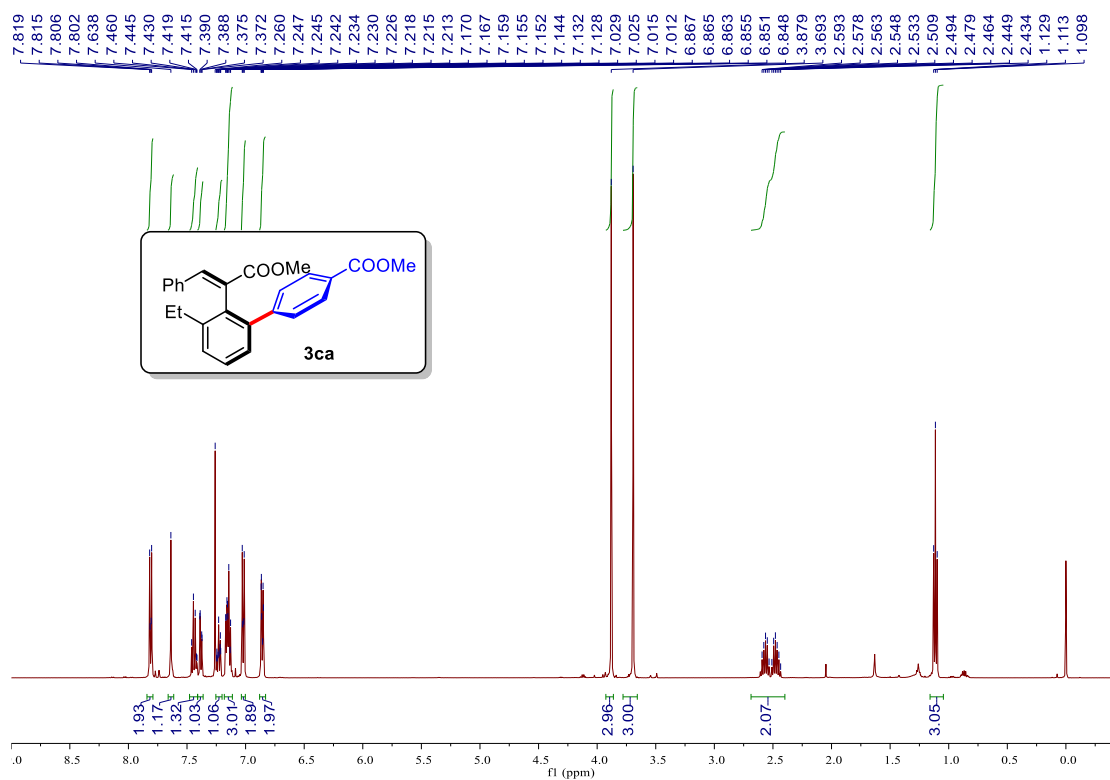

<sup>1</sup>H NMR Spectrum of **3ca** (CDCl<sub>3</sub>, 500 MHz)



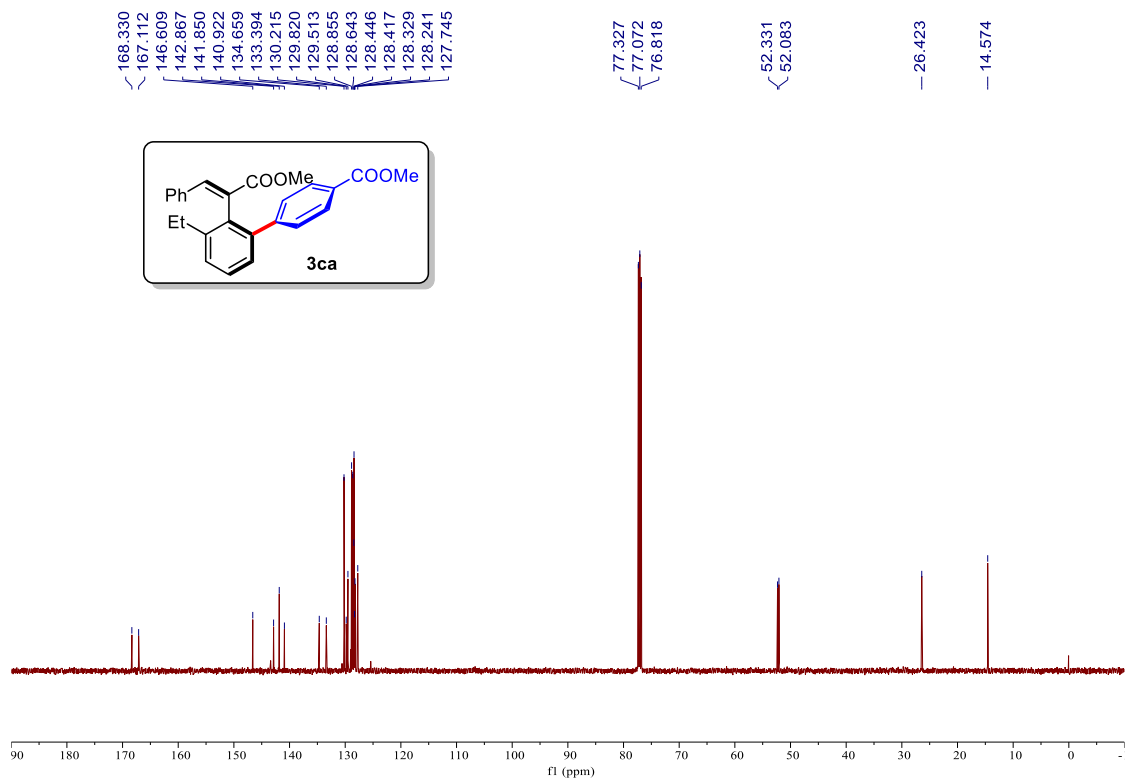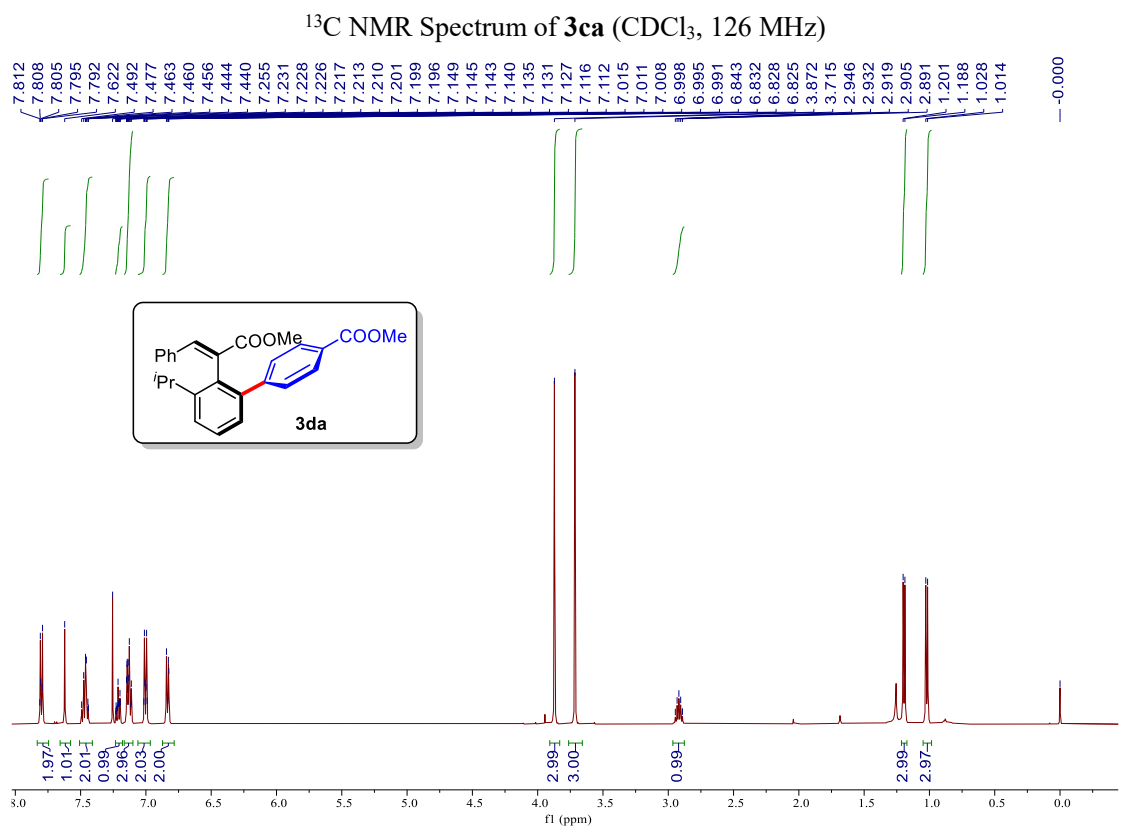

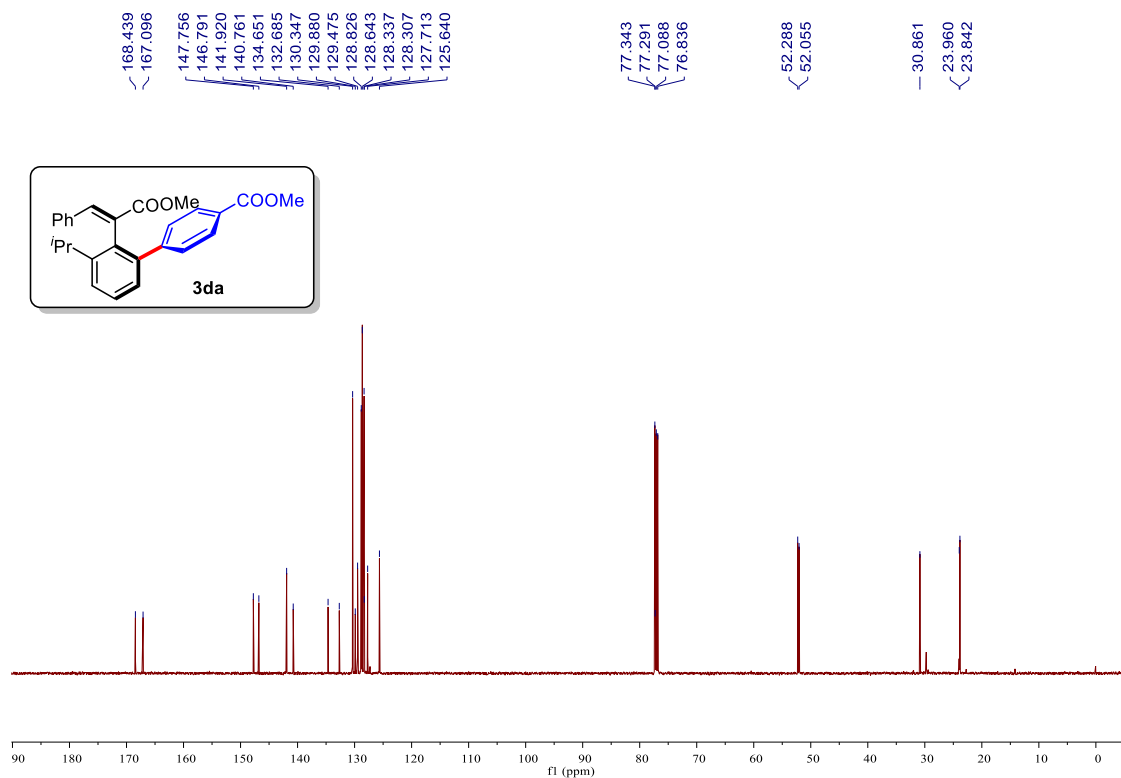

<sup>13</sup>C NMR Spectrum of **3da** (CDCl<sub>3</sub>, 126 MHz)

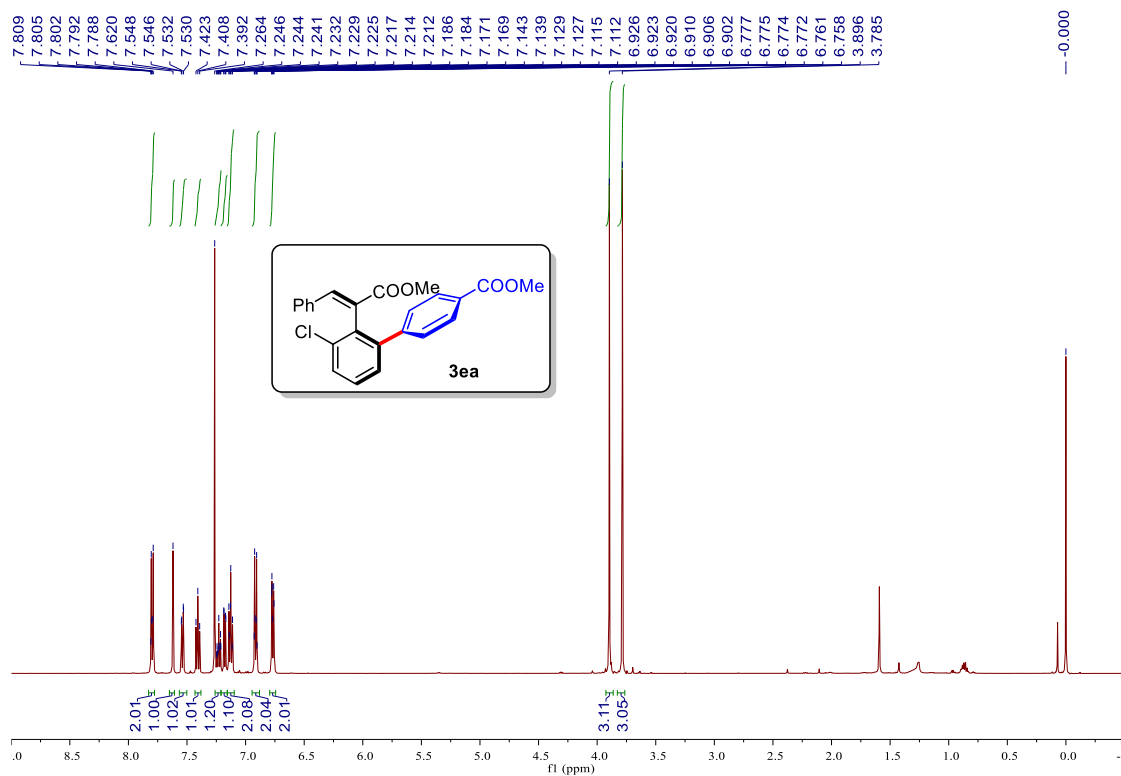

<sup>1</sup>H NMR Spectrum of **3ea** (CDCl<sub>3</sub>, 500 MHz)

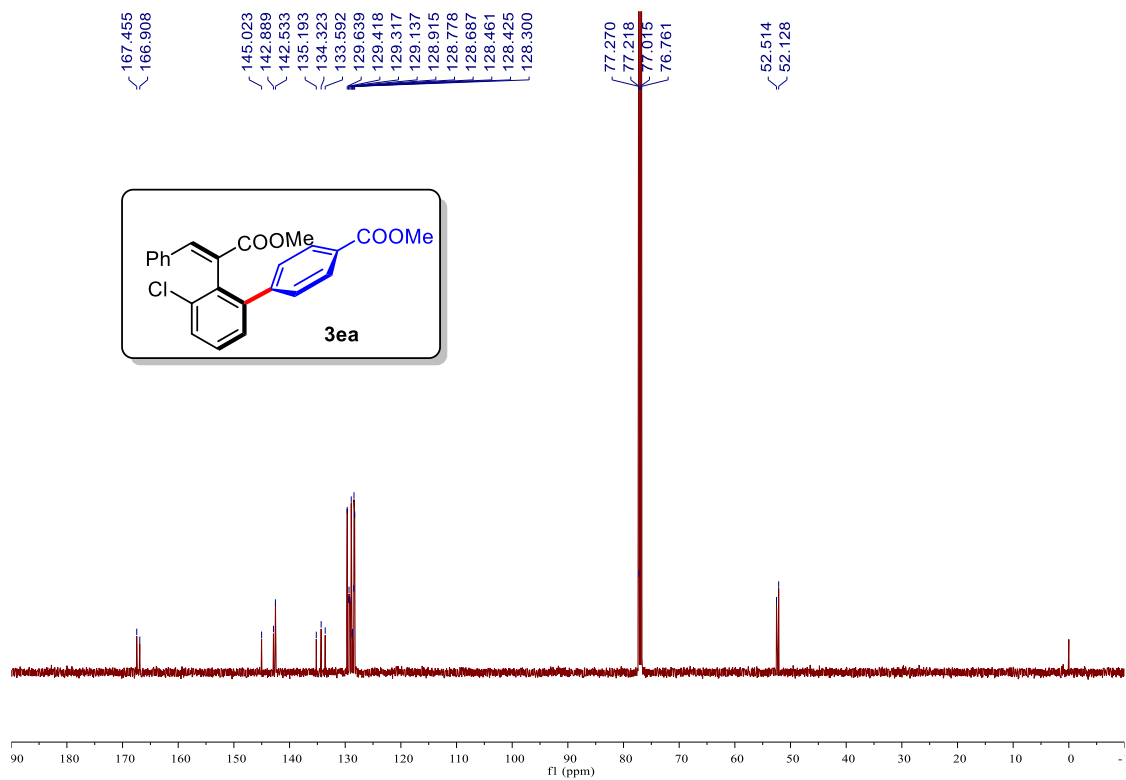

<sup>13</sup>C NMR Spectrum of **3ea** (CDCl<sub>3</sub>, 126 MHz)

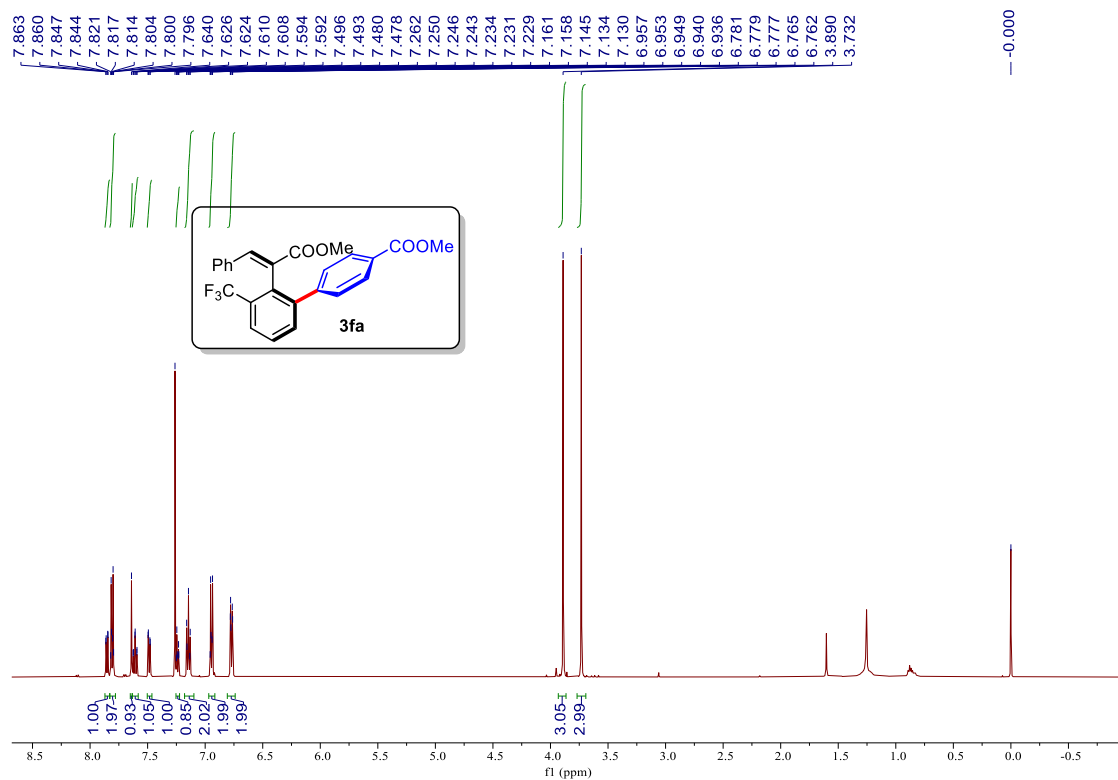

<sup>1</sup>H NMR Spectrum of **3fa** (CDCl<sub>3</sub>, 500 MHz)

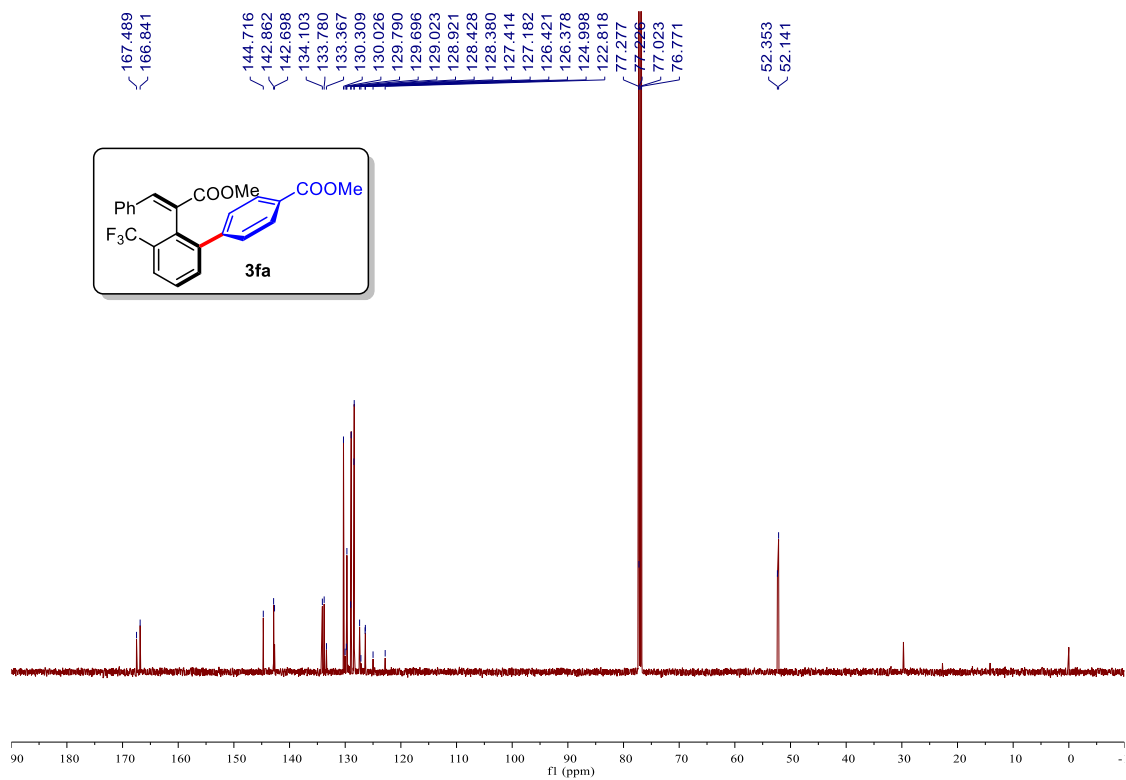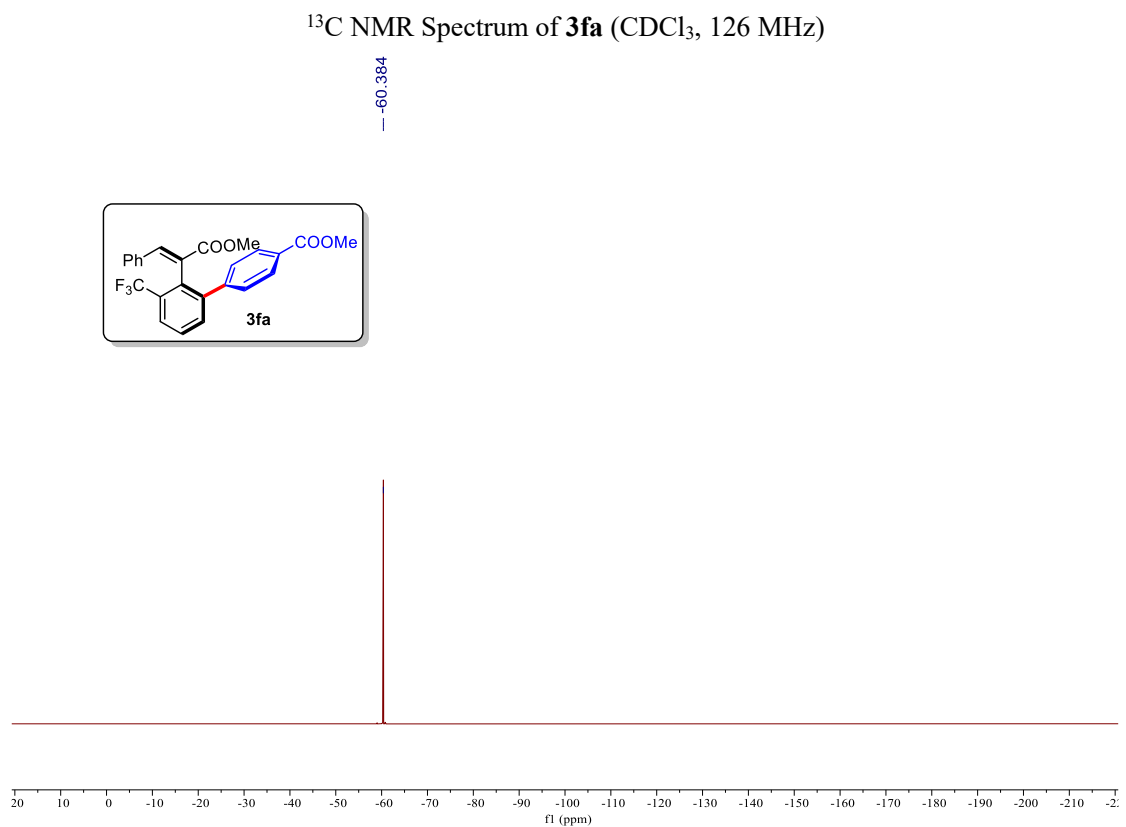

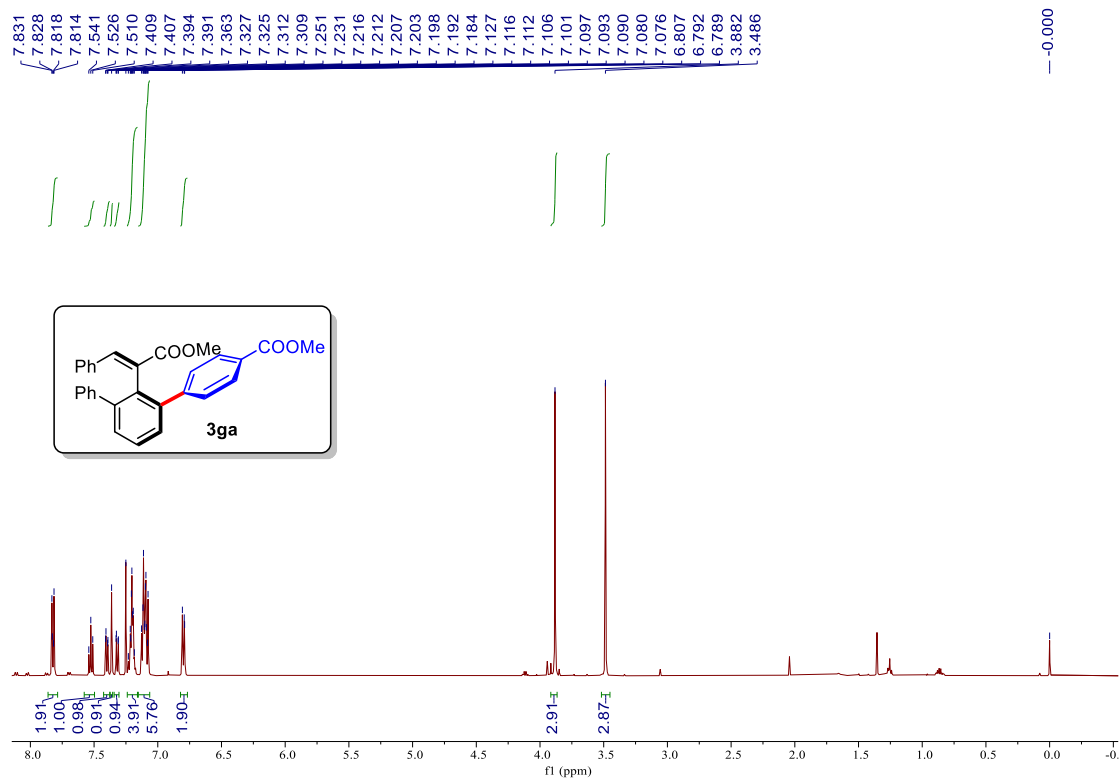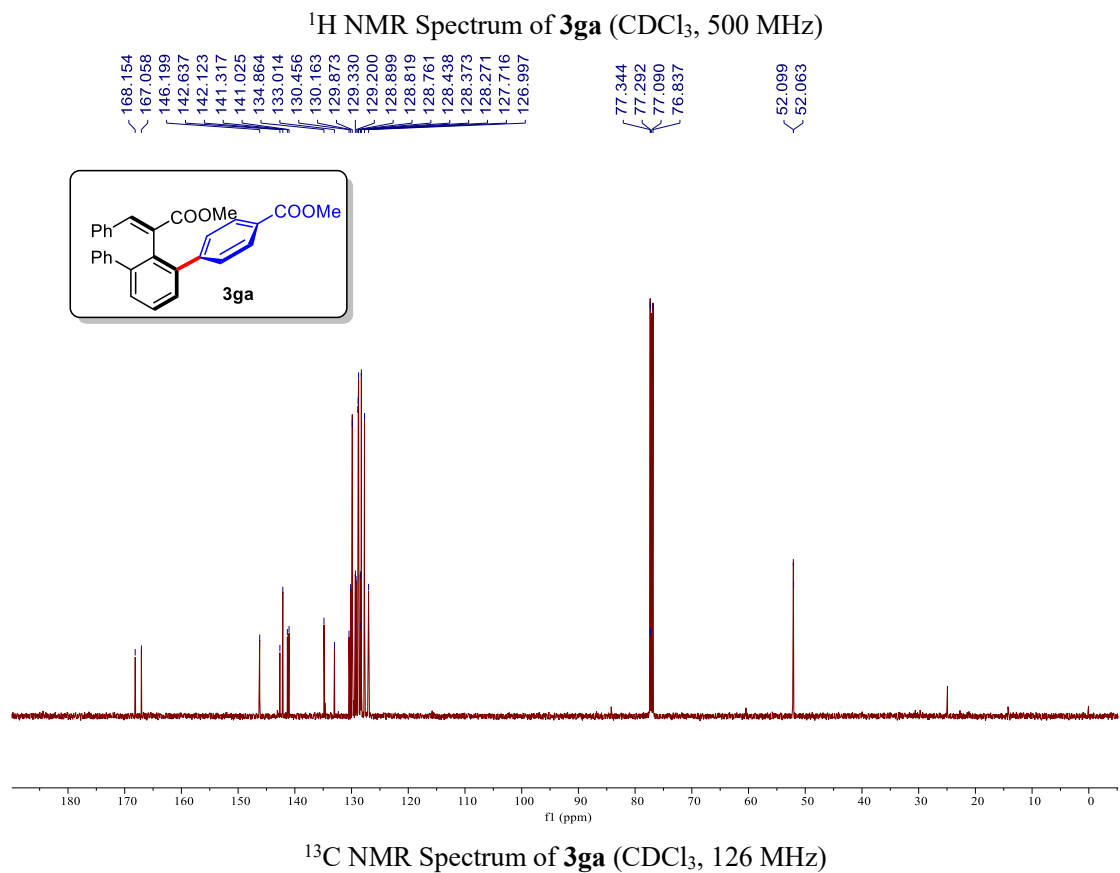

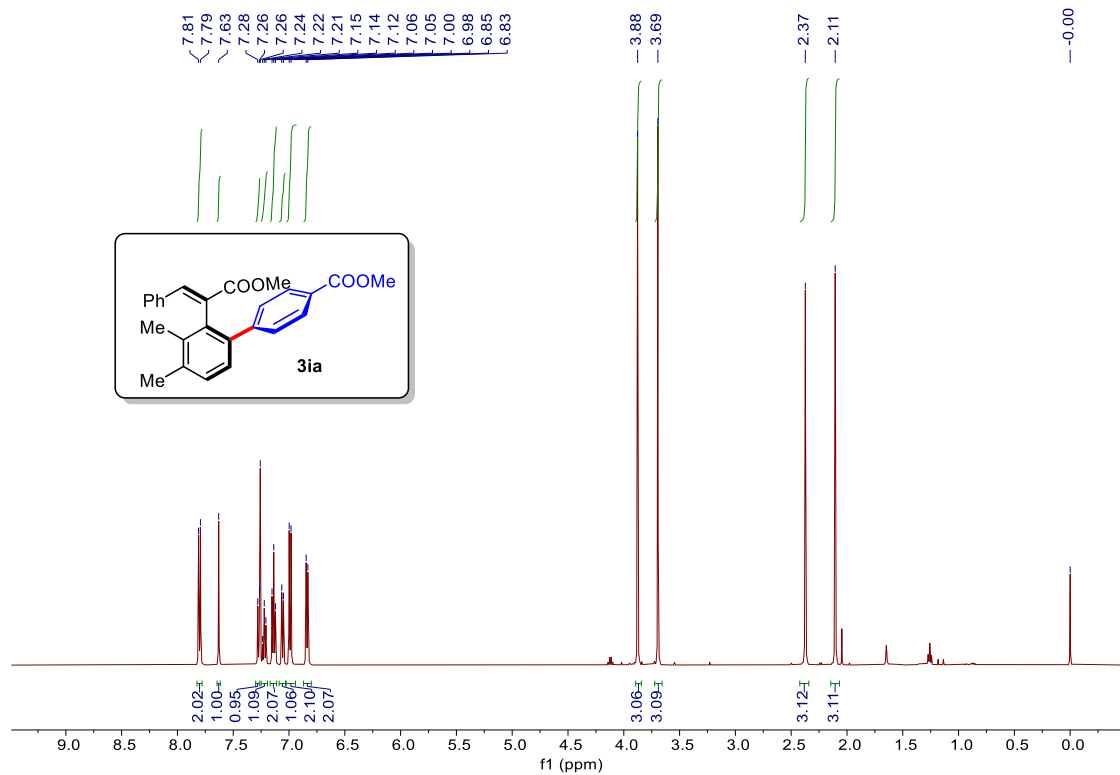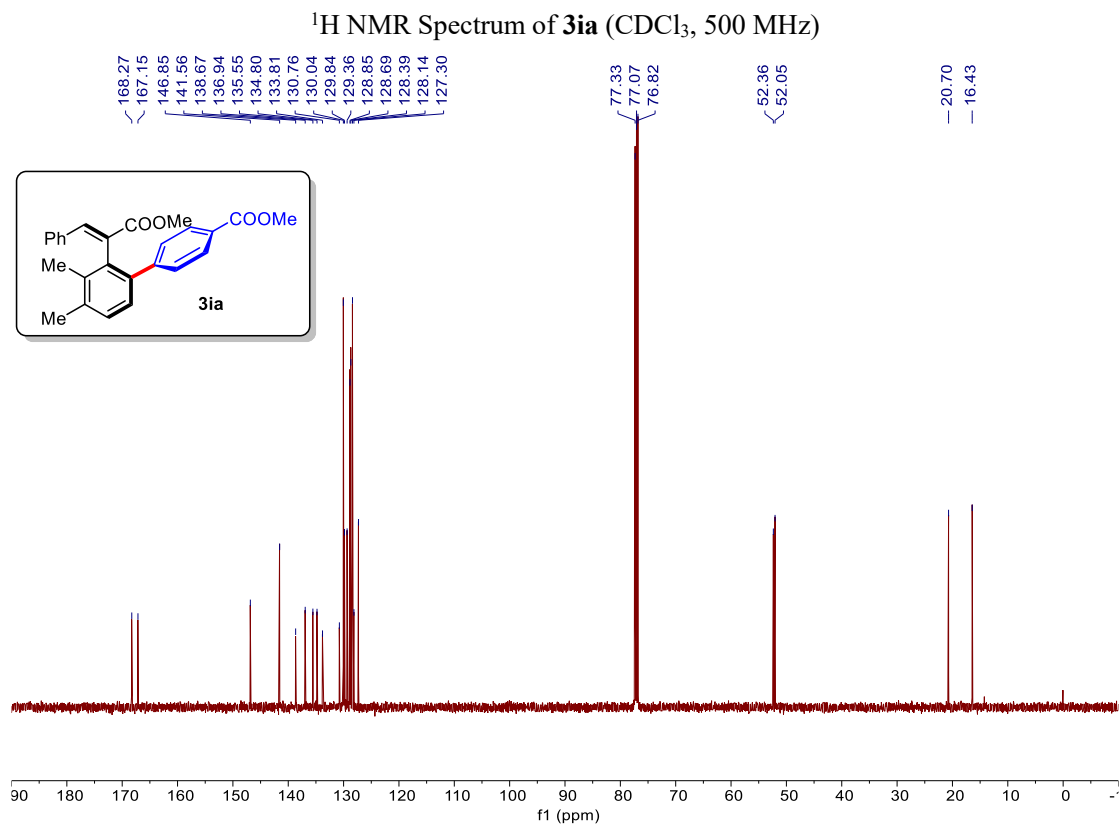

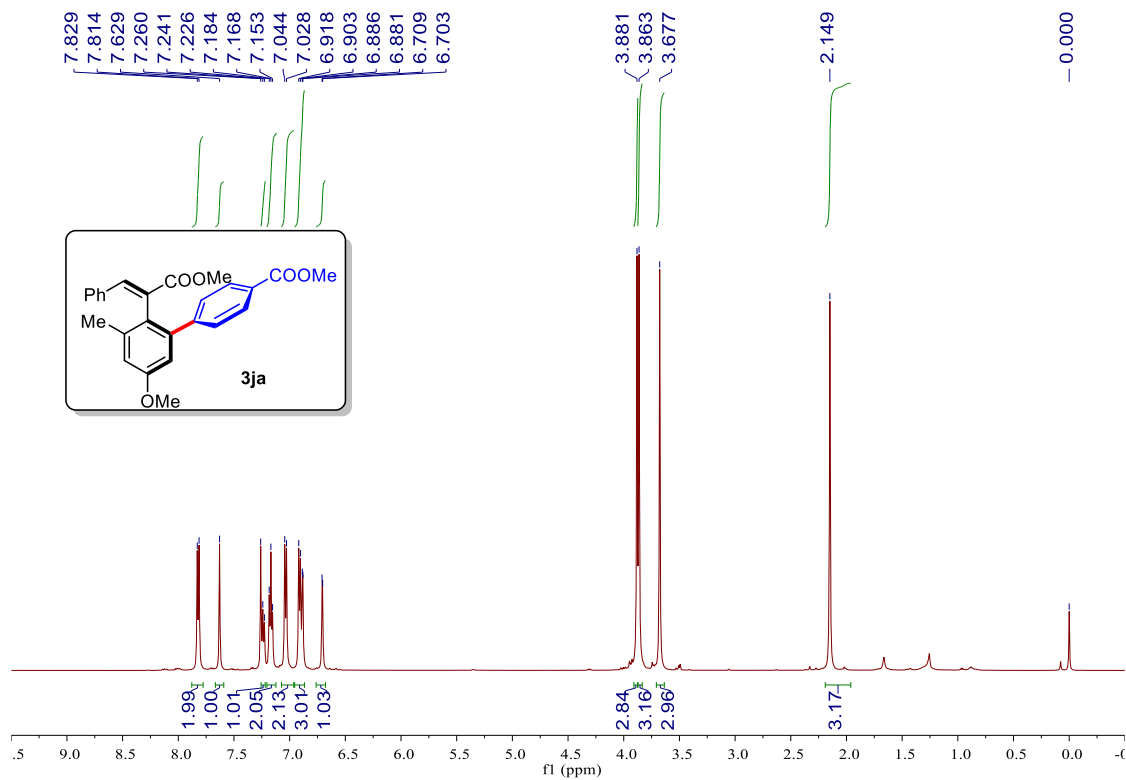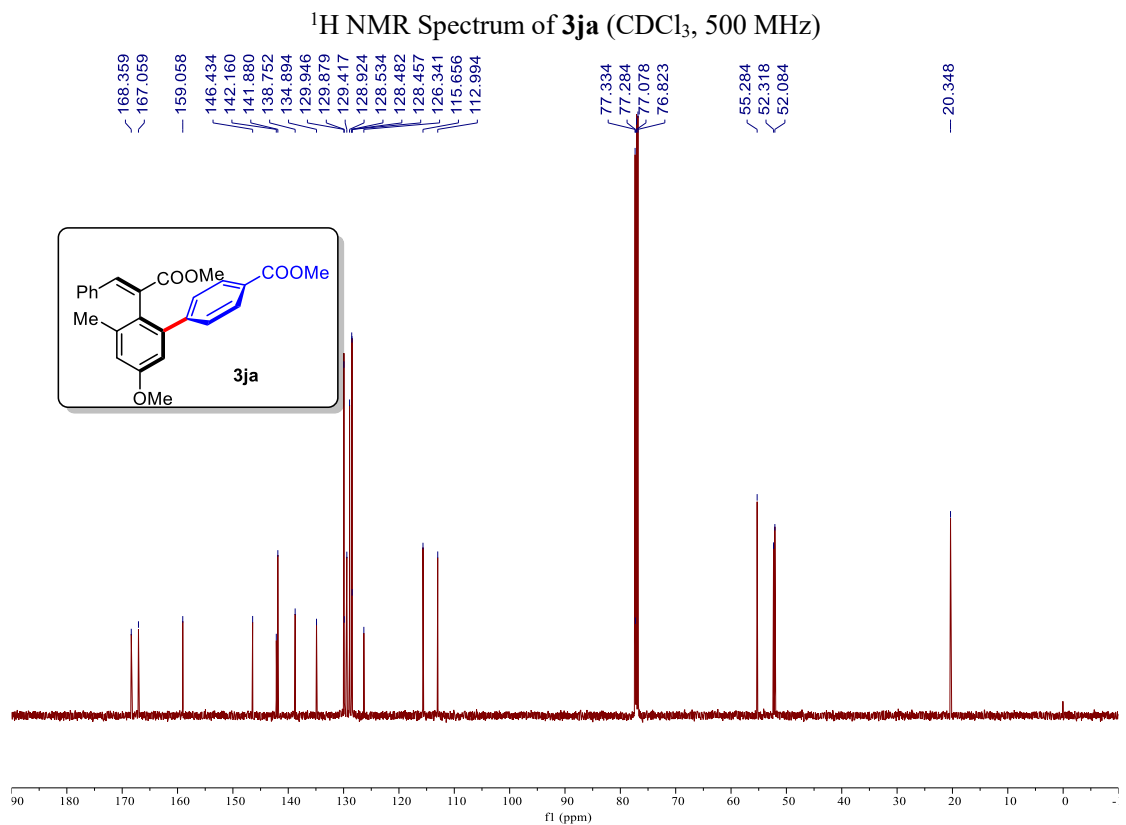

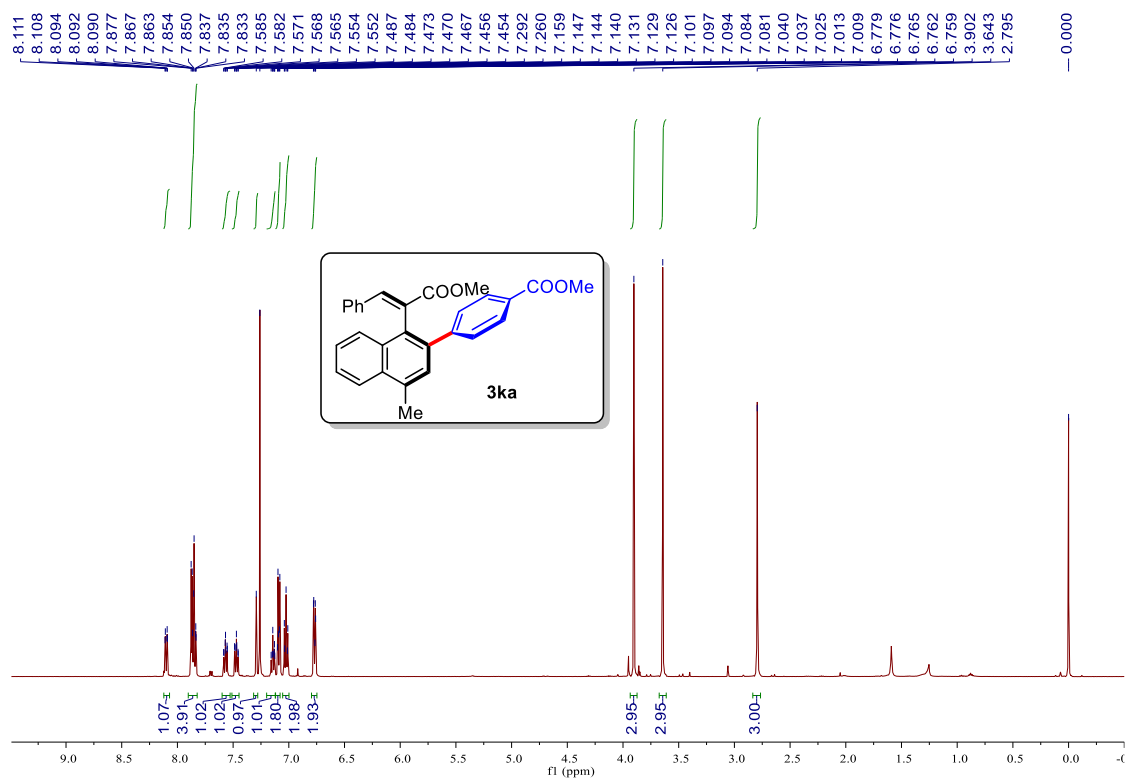

<sup>1</sup>H NMR Spectrum of **3ka** (CDCl<sub>3</sub>, 500 MHz)

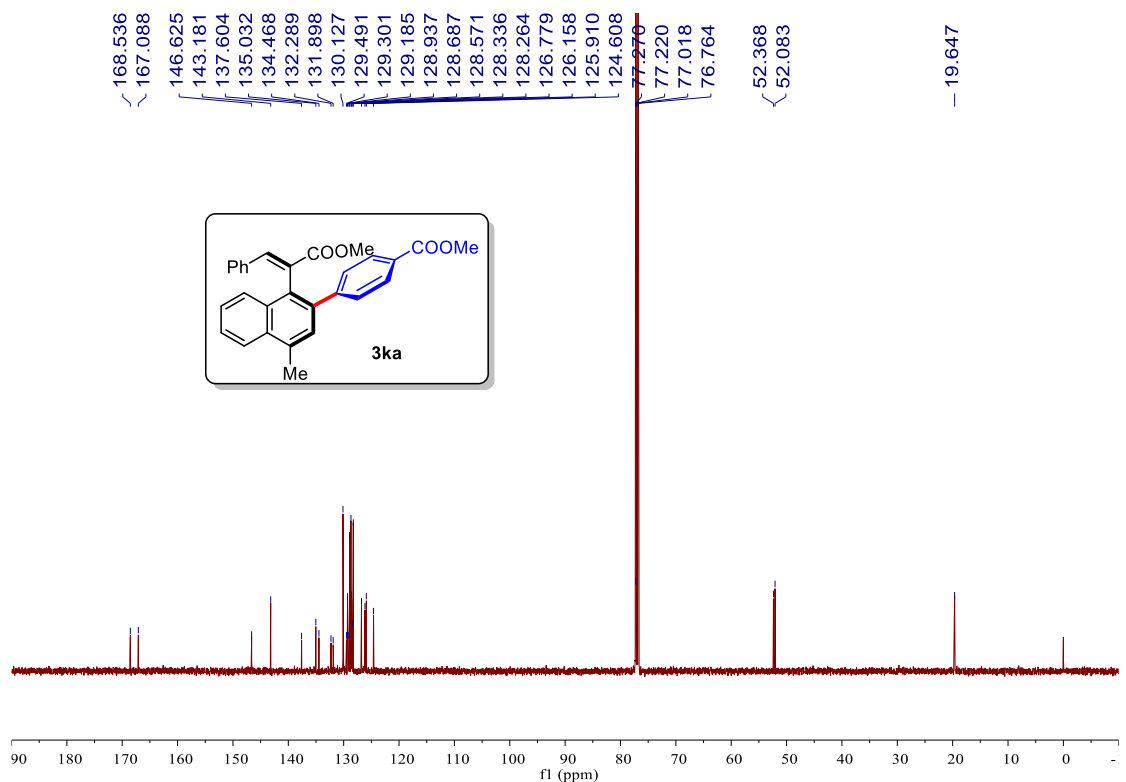

<sup>13</sup>C NMR Spectrum of **3ka** (CDCl<sub>3</sub>, 126 MHz)



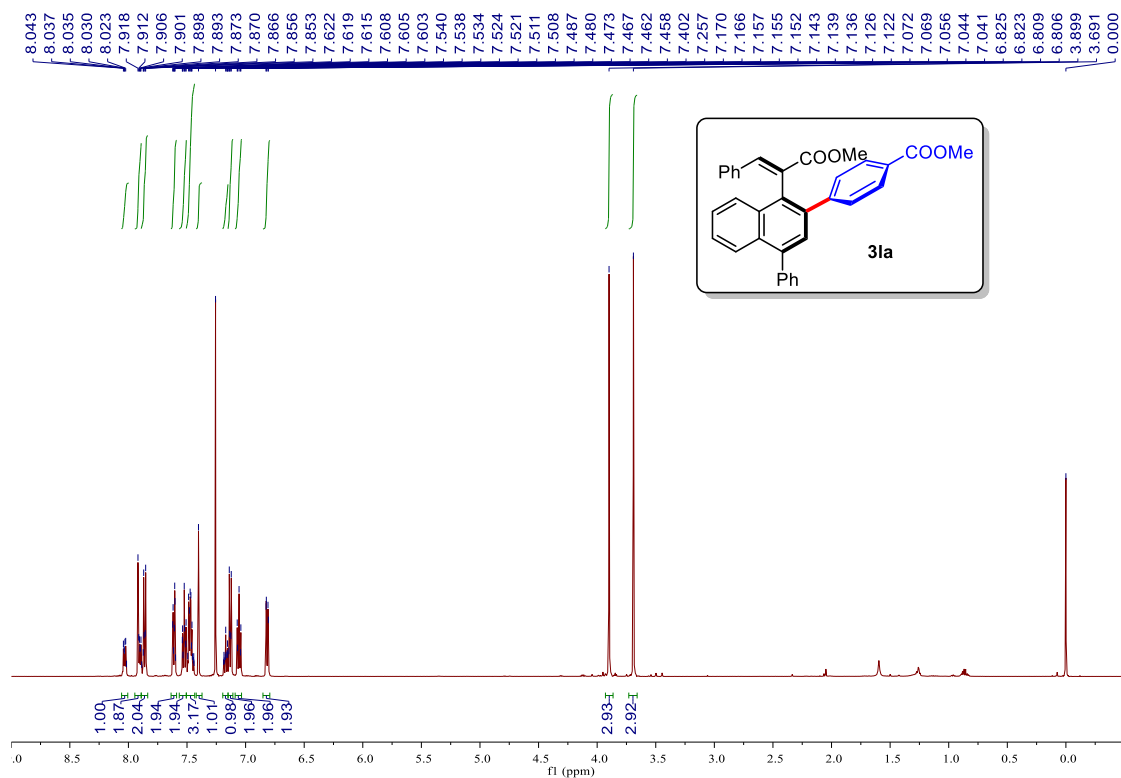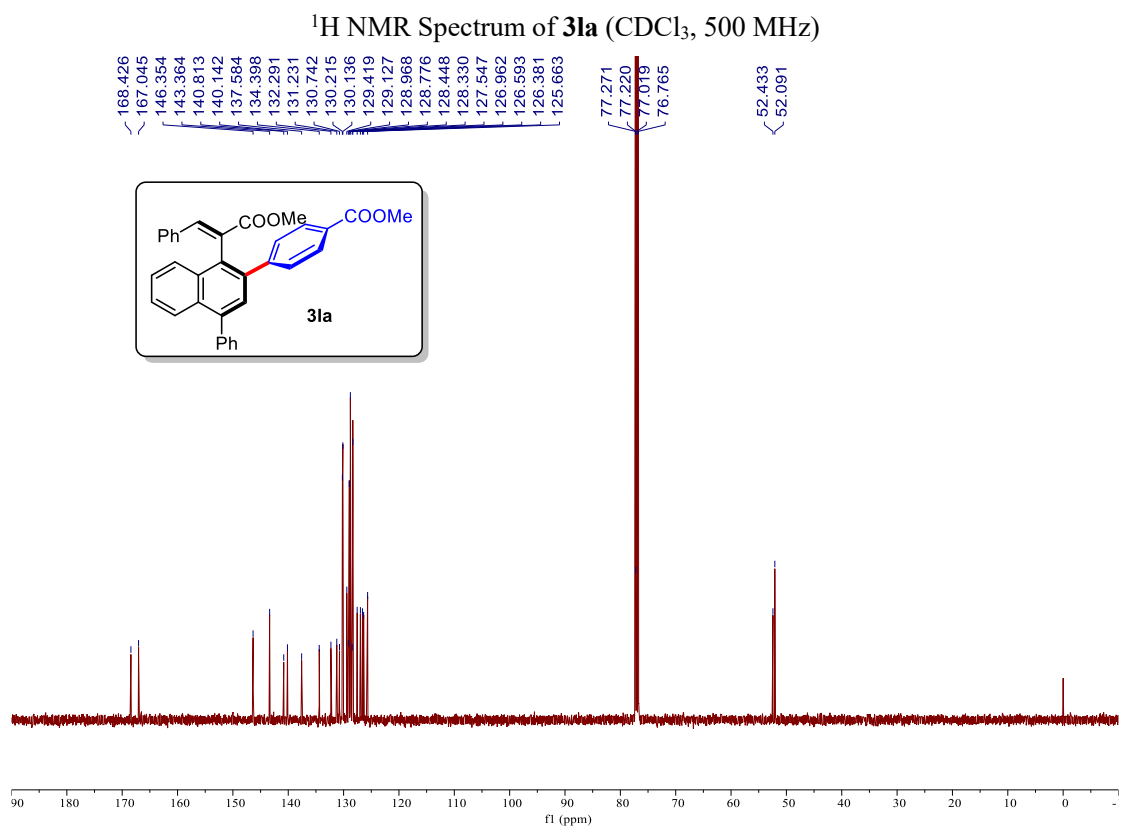

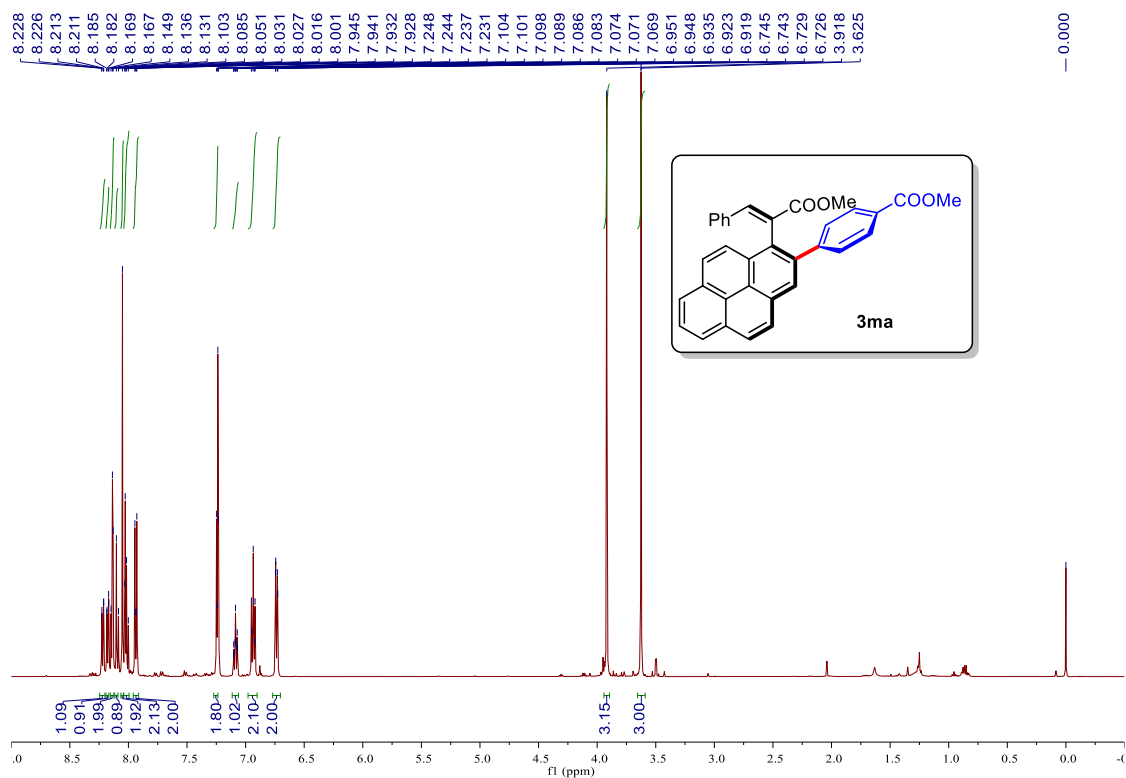

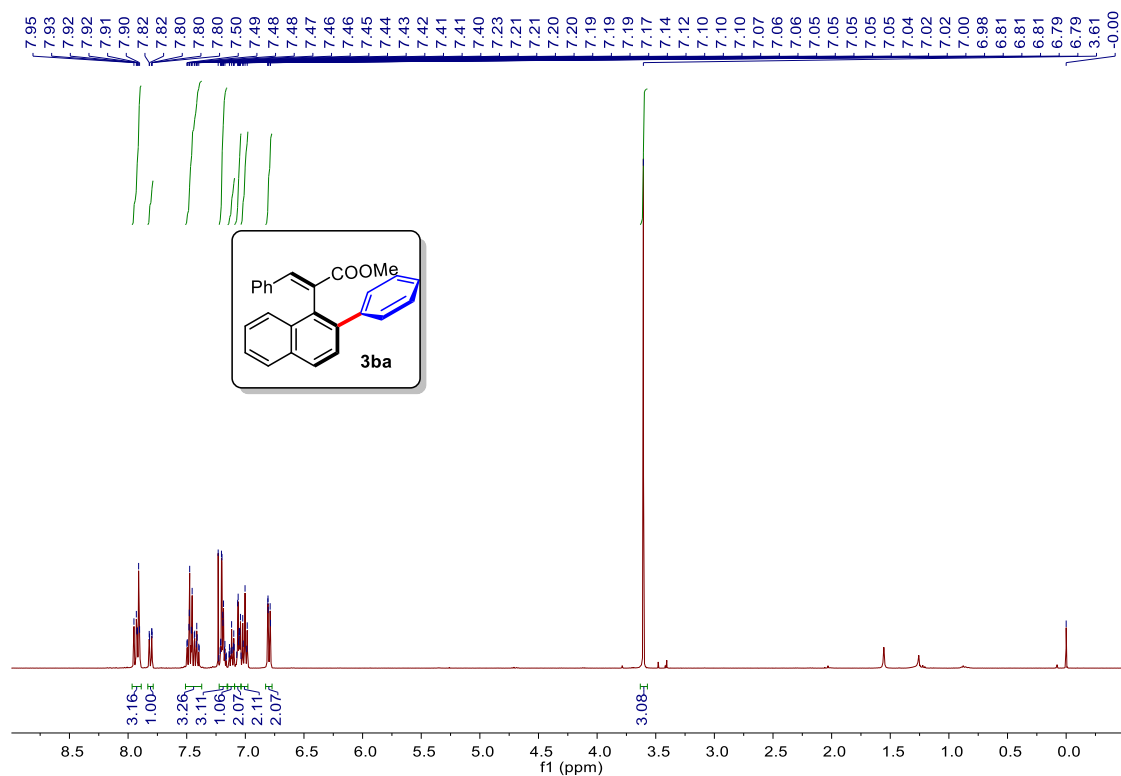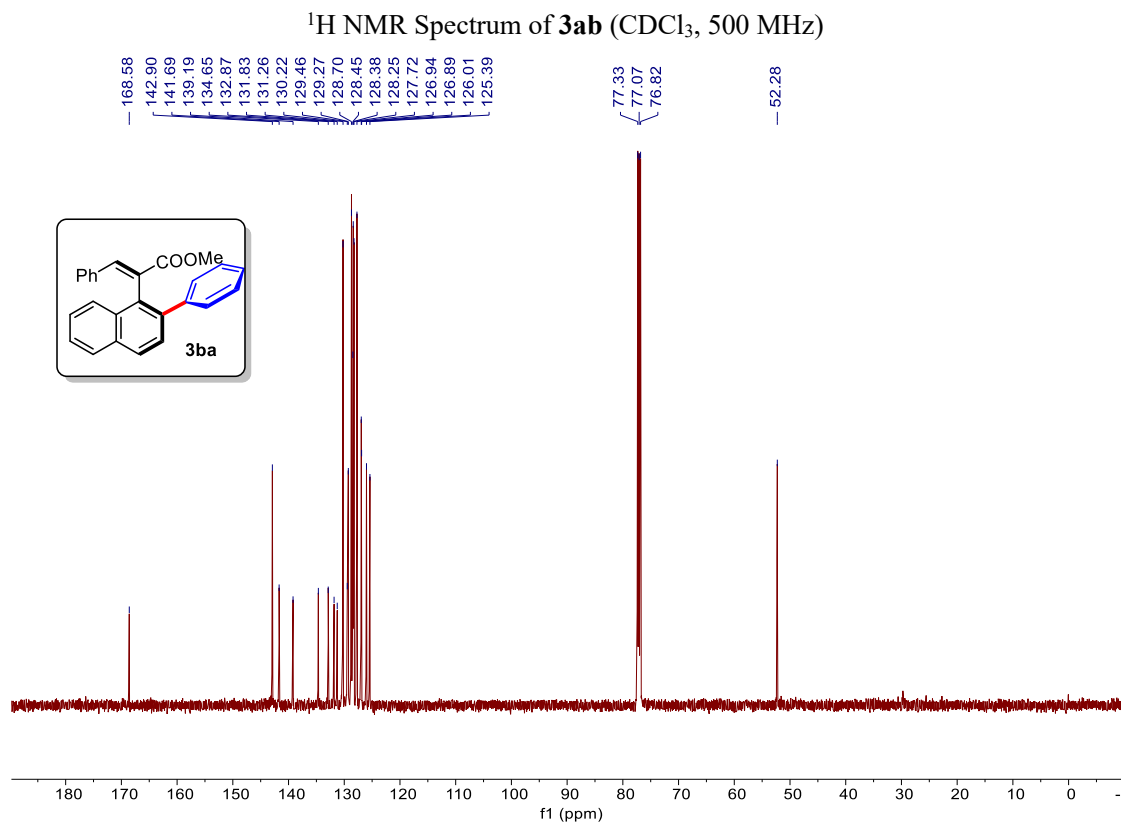



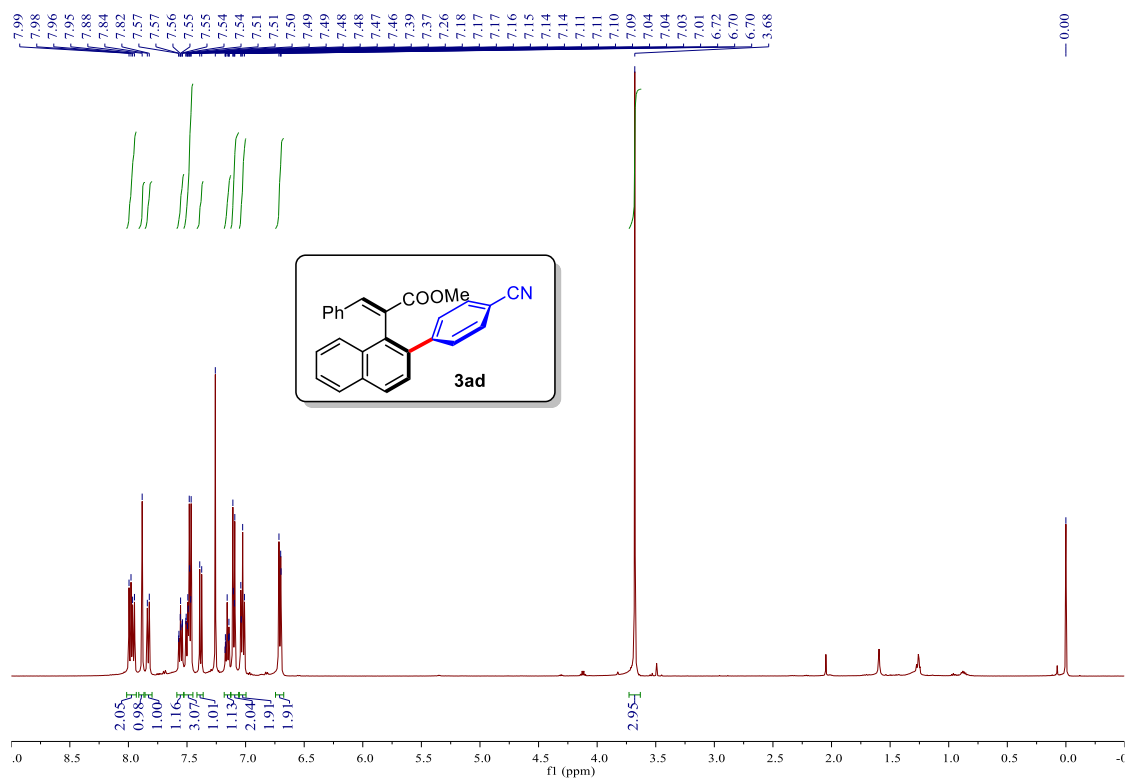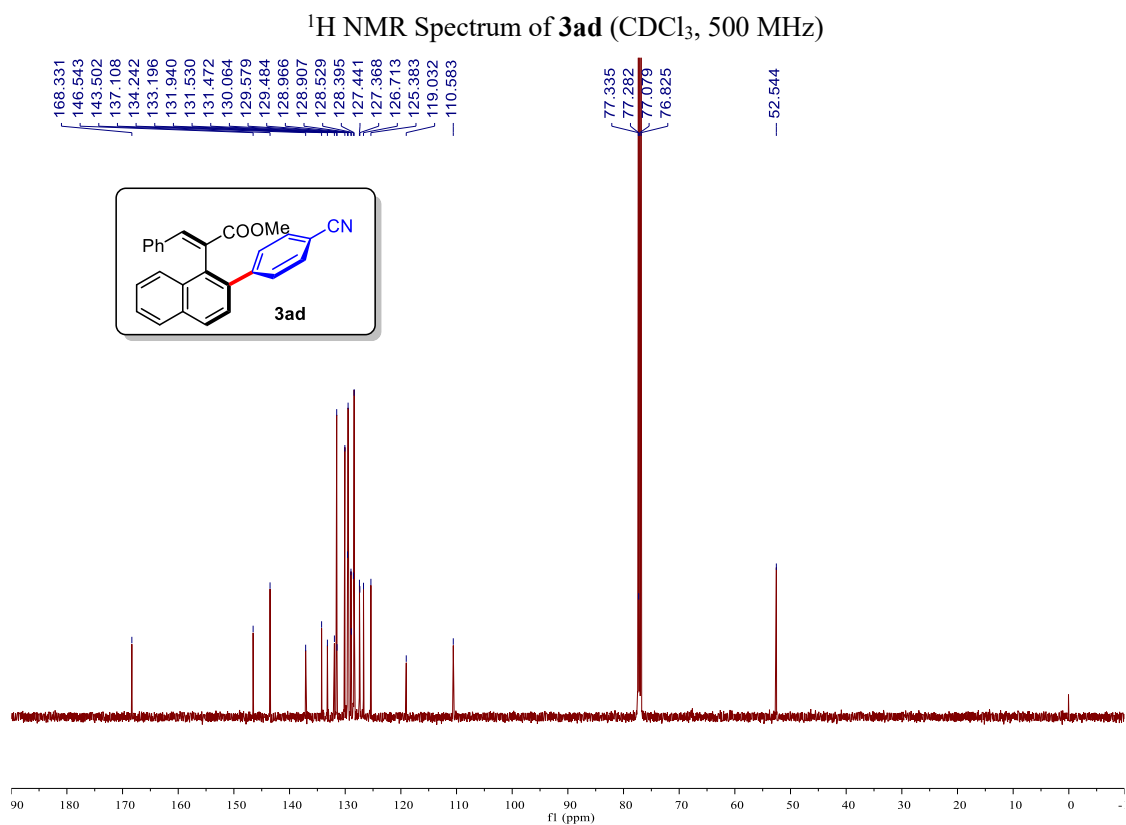

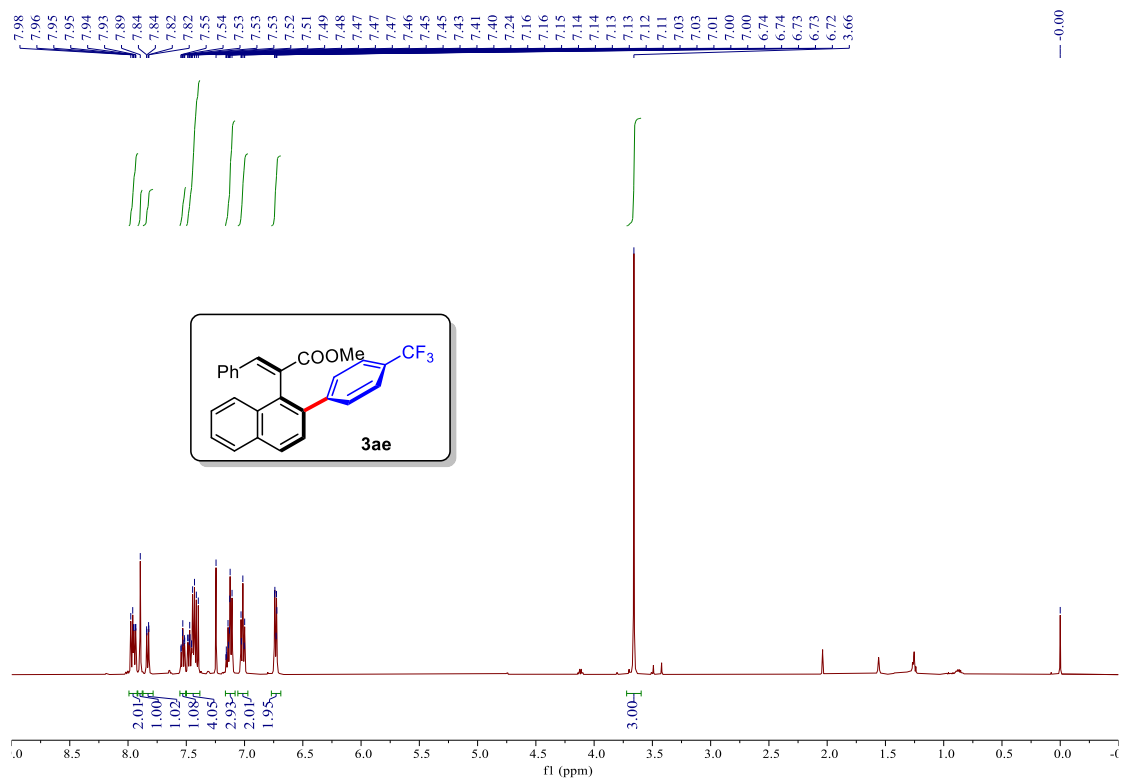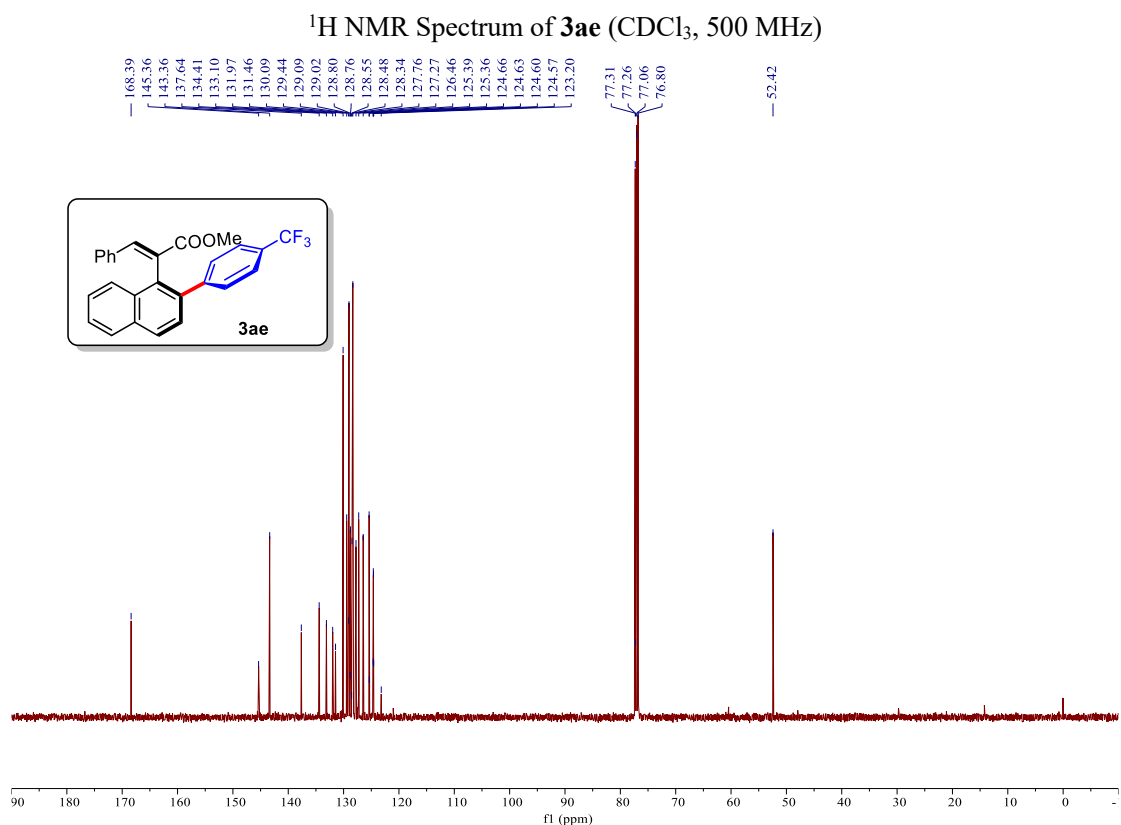

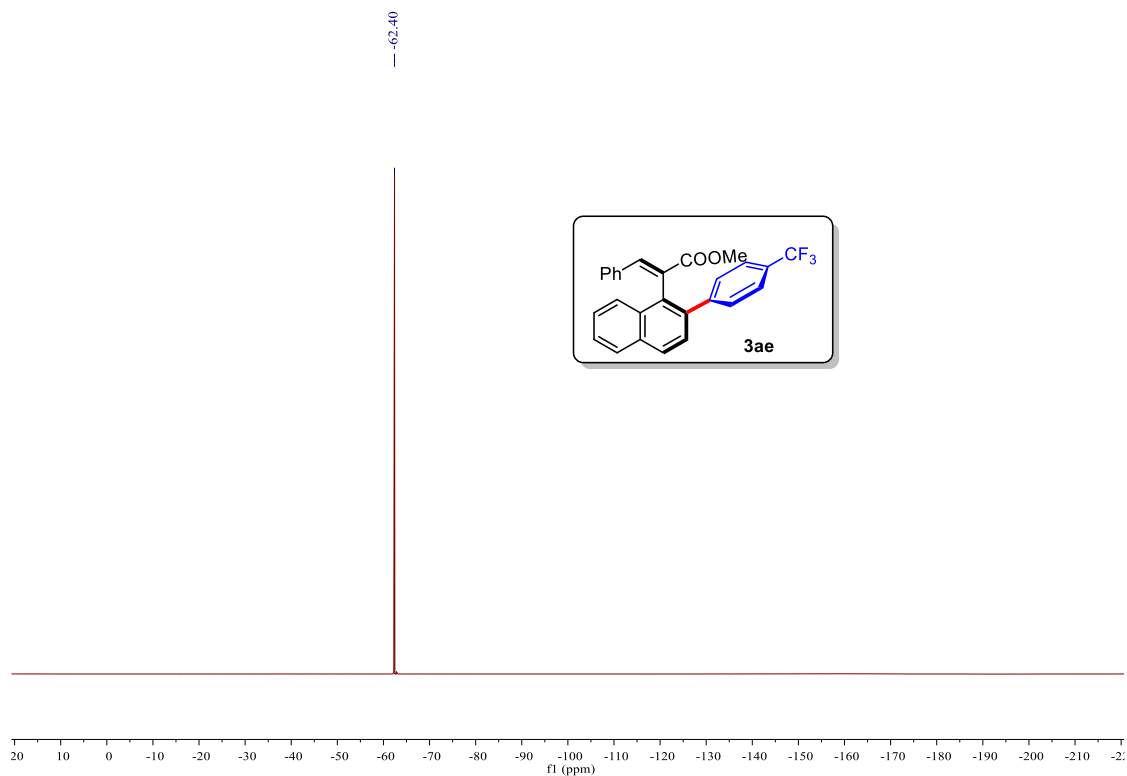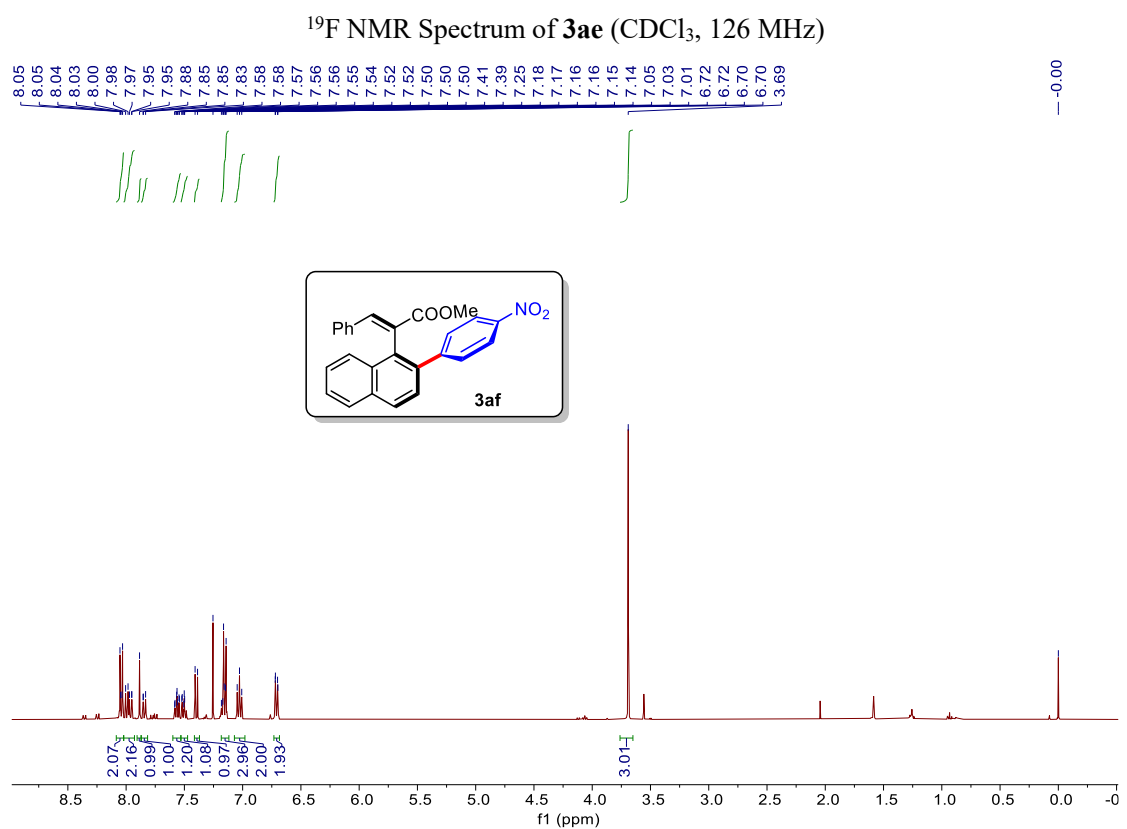

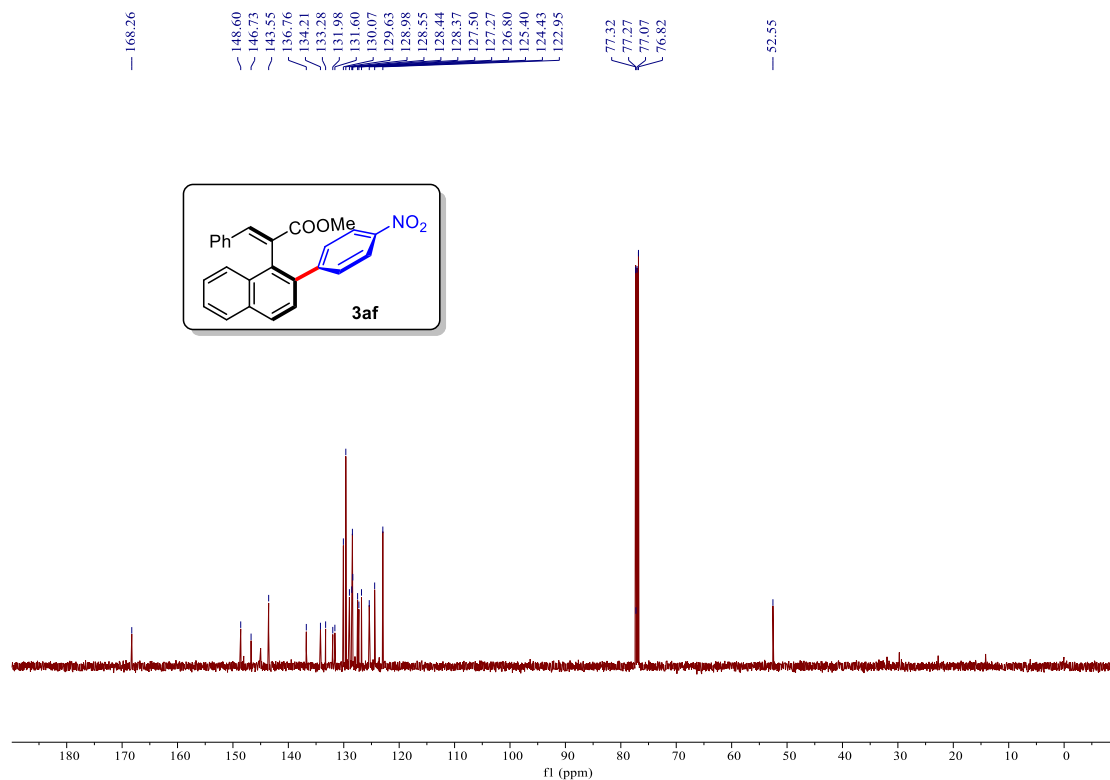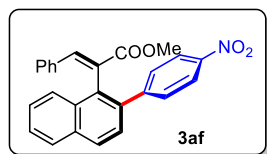

$^{13}\text{C}$  NMR Spectrum of **3af** ( $\text{CDCl}_3$ , 126 MHz)

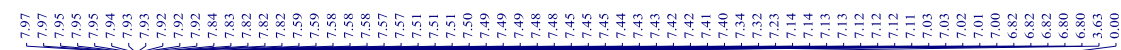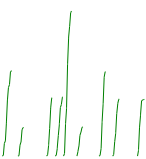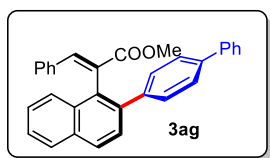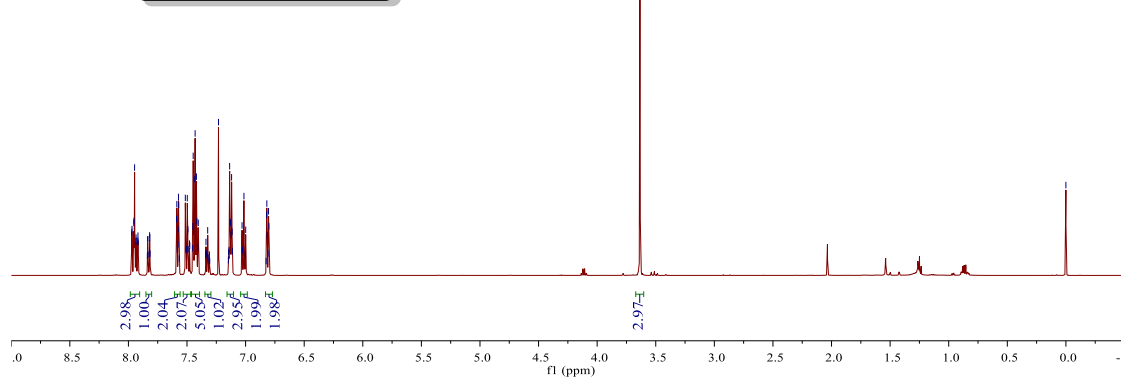

$^1\text{H}$  NMR Spectrum of **3ag** ( $\text{CDCl}_3$ , 500 MHz)



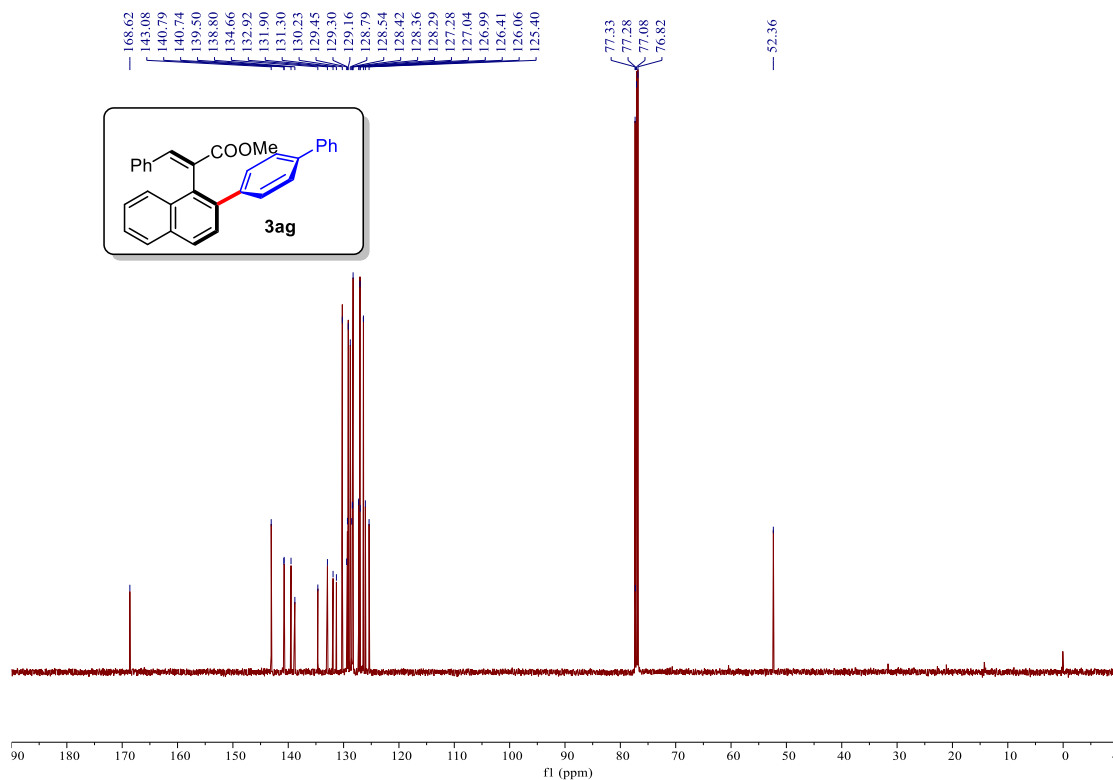

<sup>13</sup>C NMR Spectrum of **3ag** (CDCl<sub>3</sub>, 126 MHz)

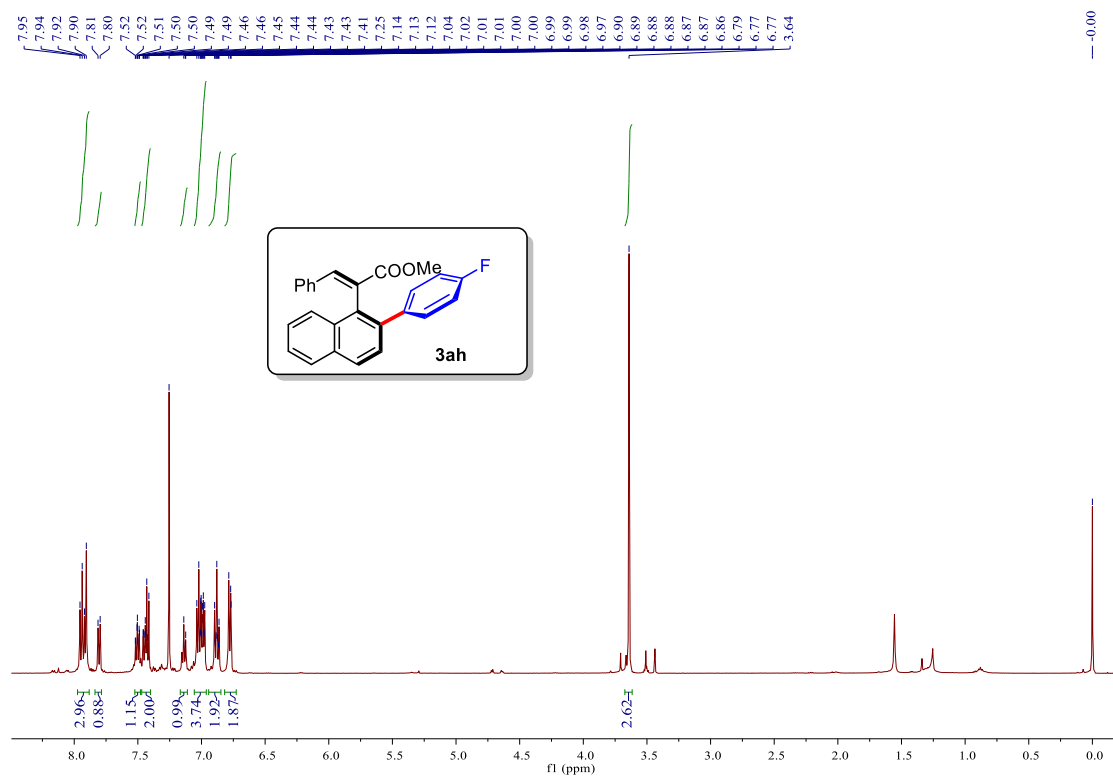

<sup>1</sup>H NMR Spectrum of **3ah** (CDCl<sub>3</sub>, 500 MHz)

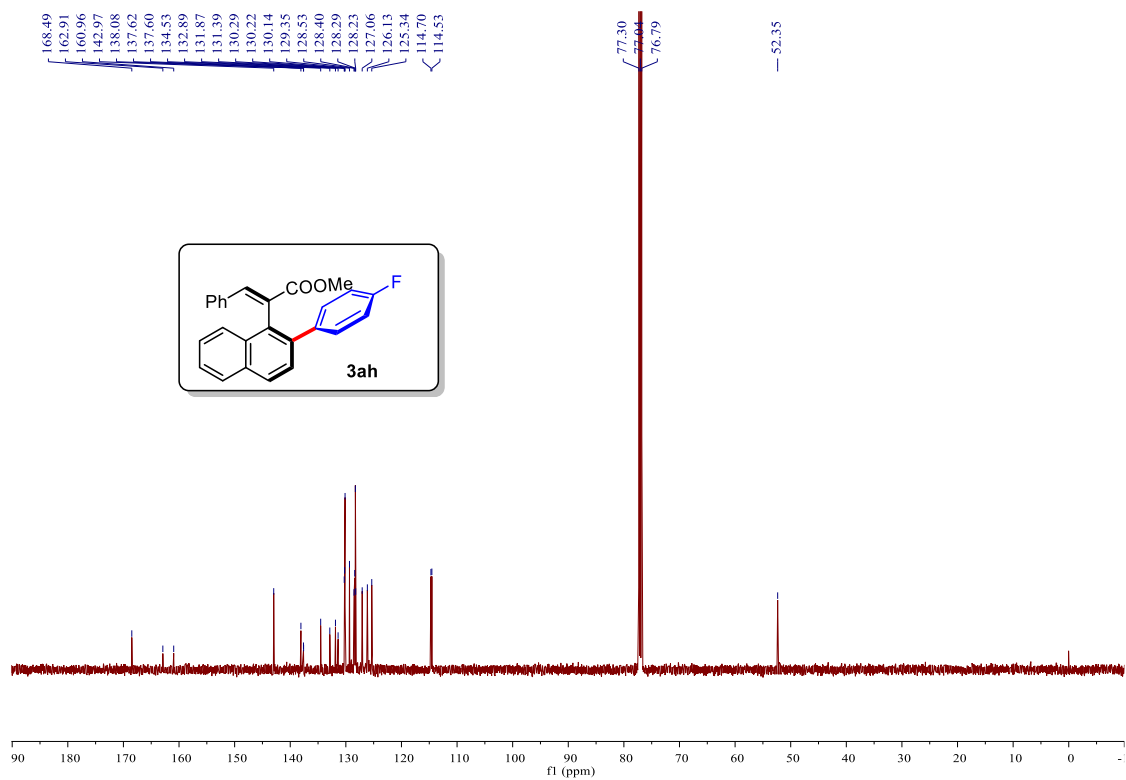

$^{13}\text{C}$  NMR Spectrum of **3ah** ( $\text{CDCl}_3$ , 126 MHz)

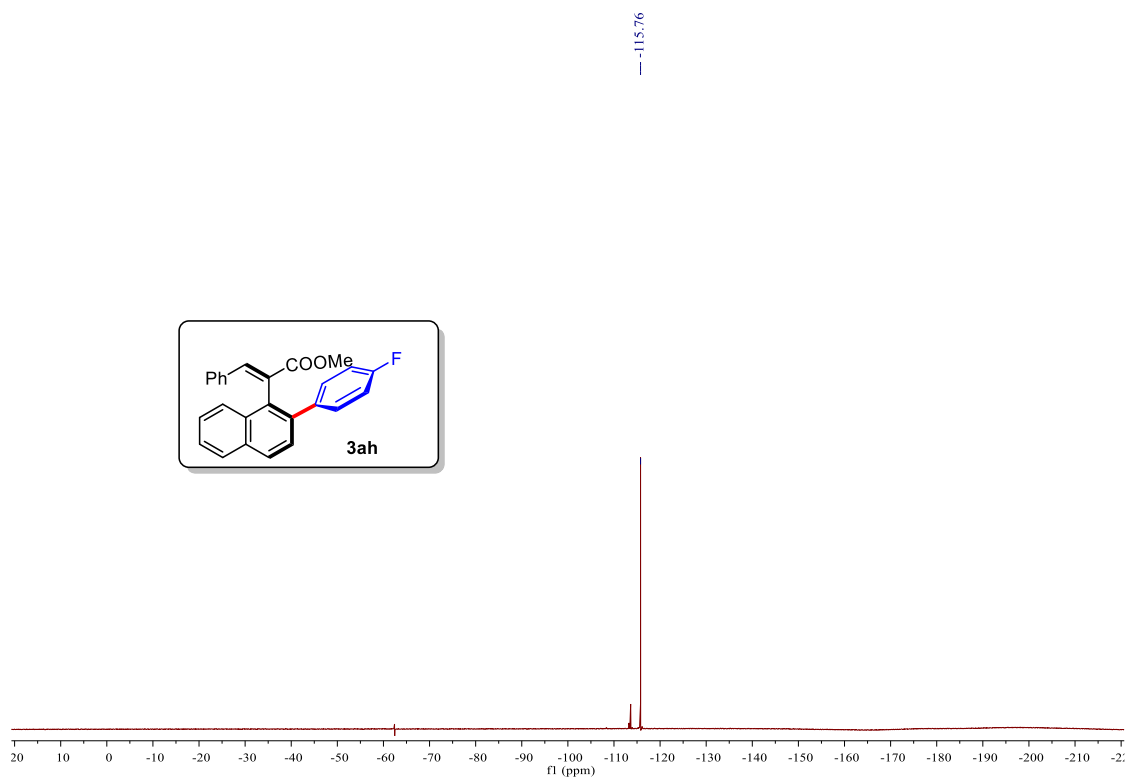

$^{19}\text{F}$  NMR Spectrum of **3ah** ( $\text{CDCl}_3$ , 126 MHz)

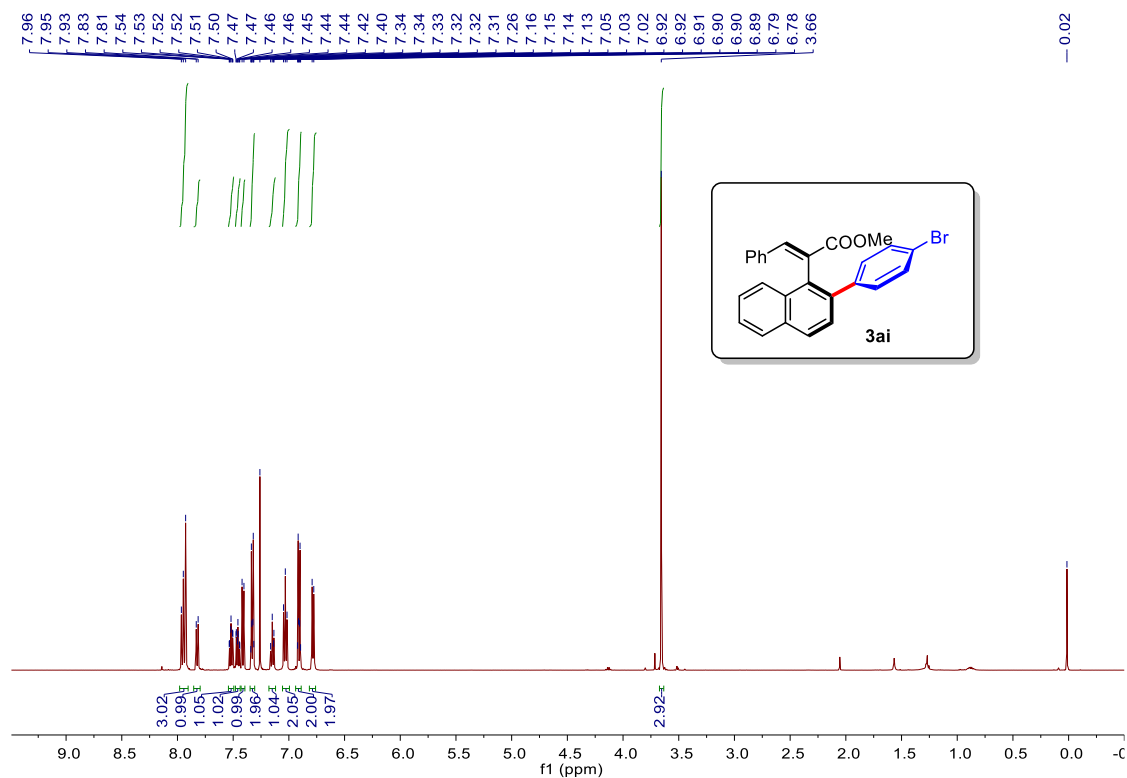

**<sup>1</sup>H NMR Spectrum of 3ai (CDCl<sub>3</sub>, 500 MHz)**

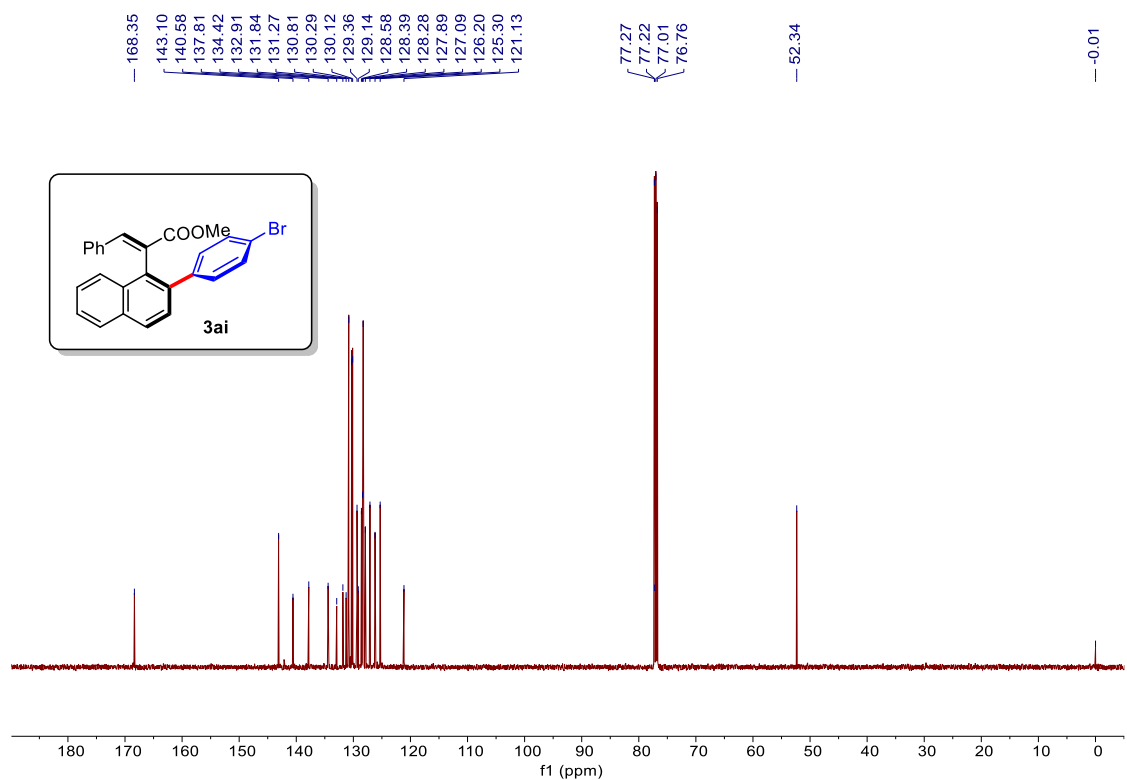

**<sup>13</sup>C NMR Spectrum of 3ai (CDCl<sub>3</sub>, 126 MHz)**

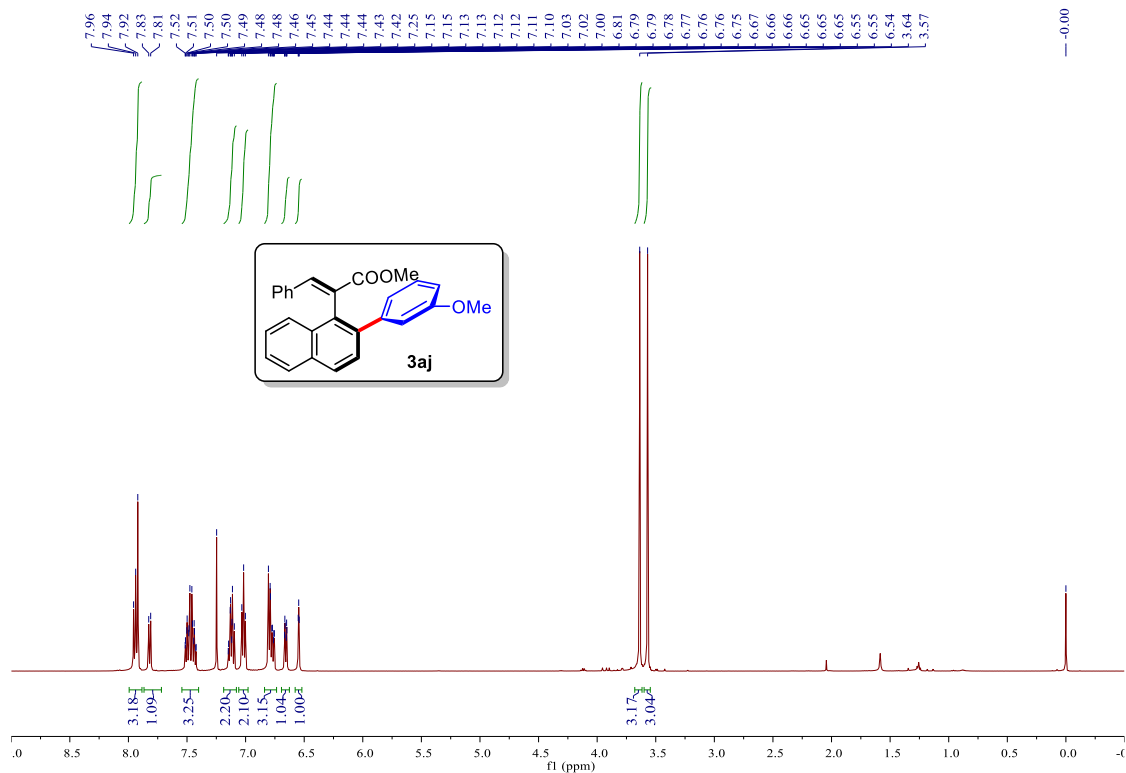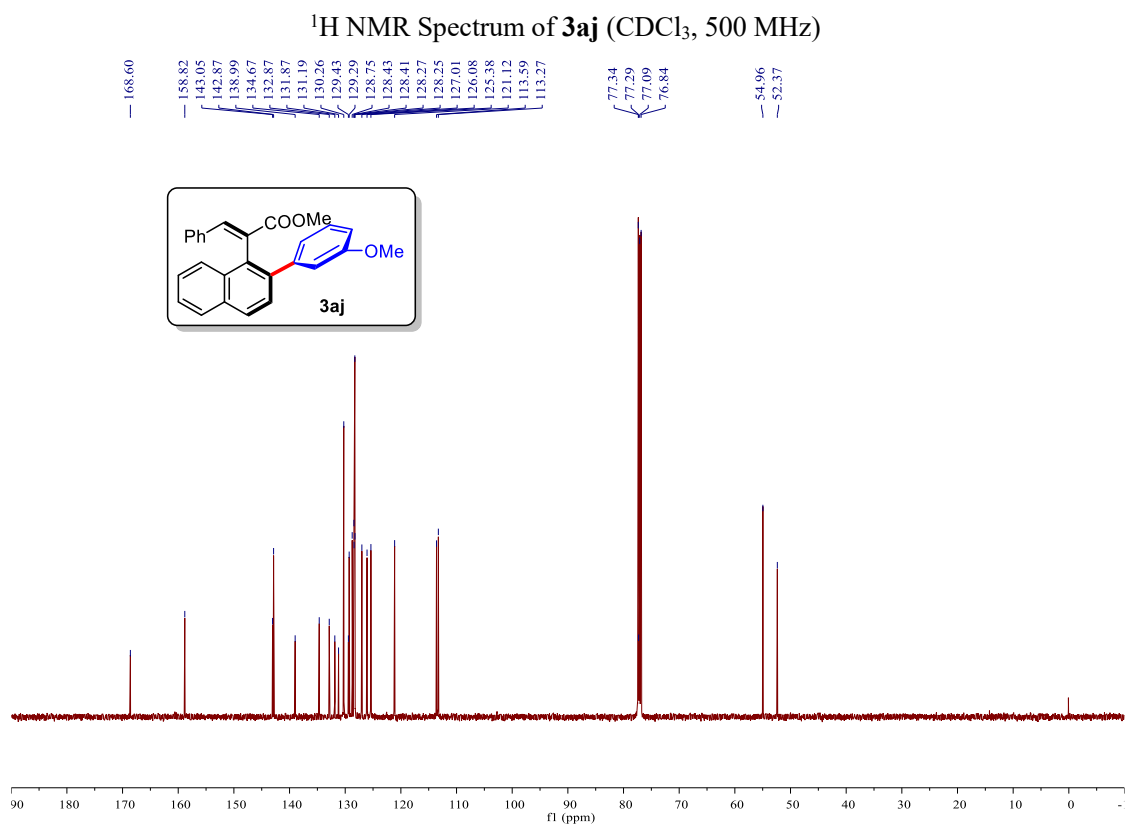



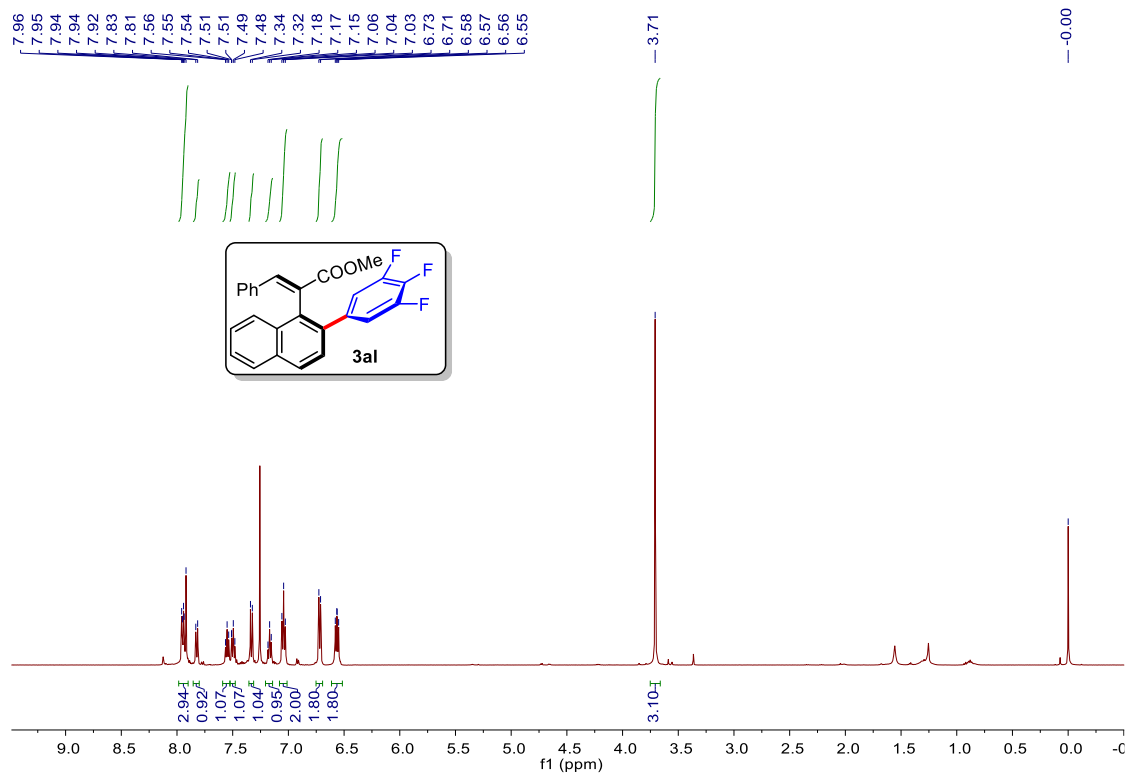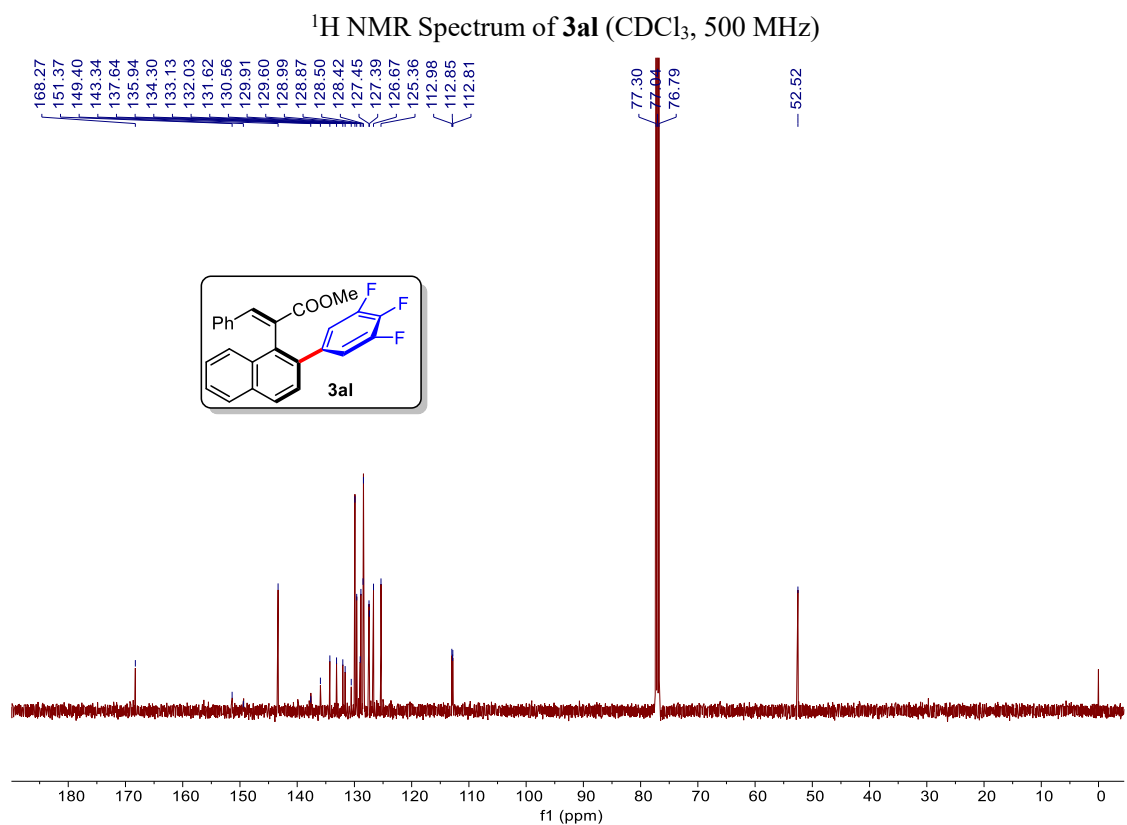

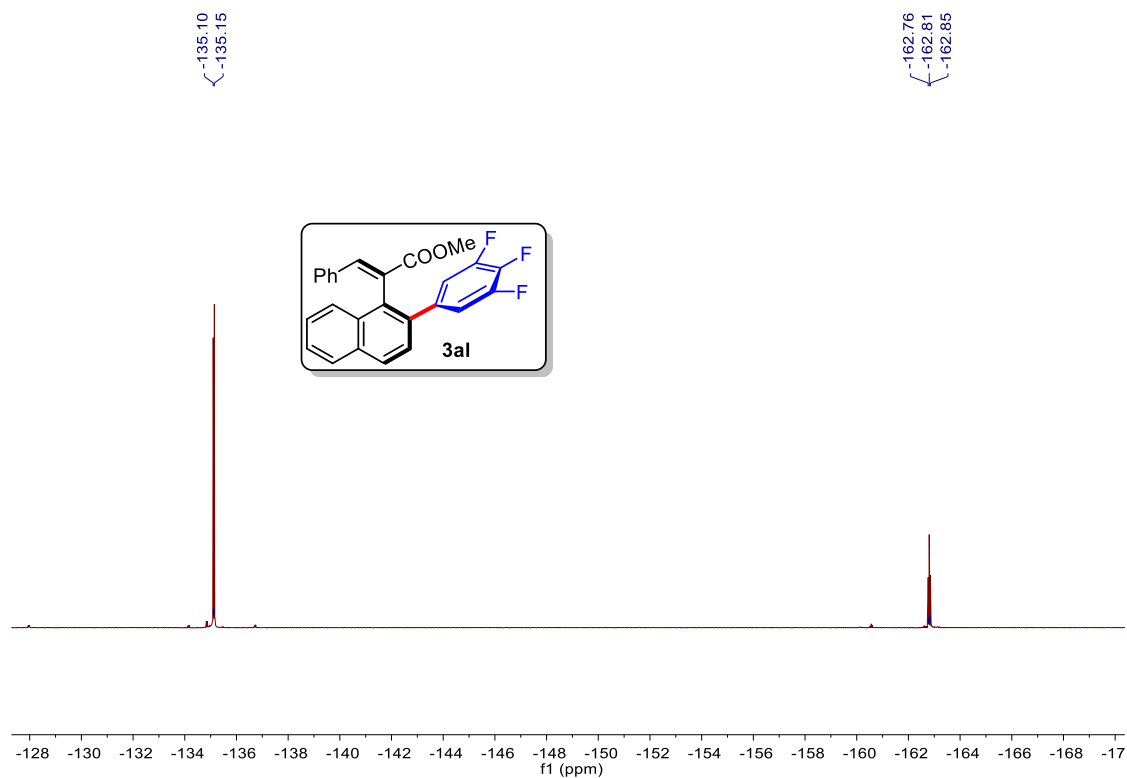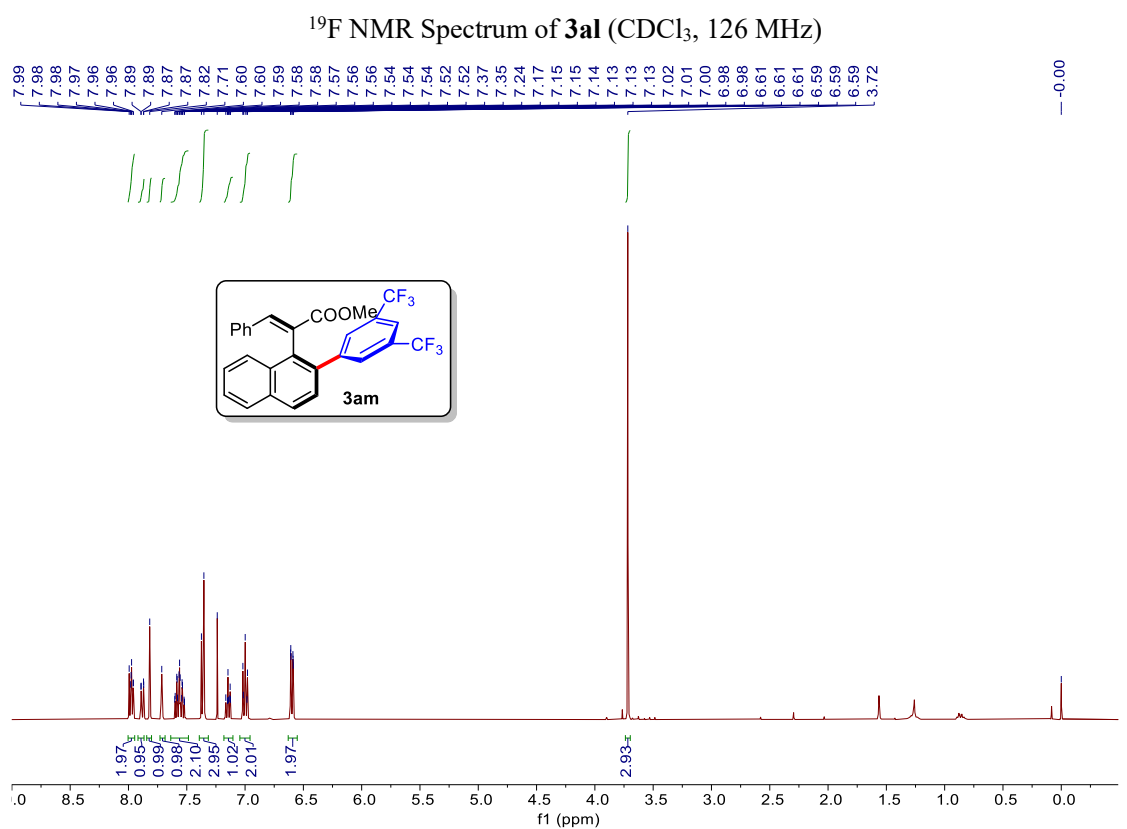

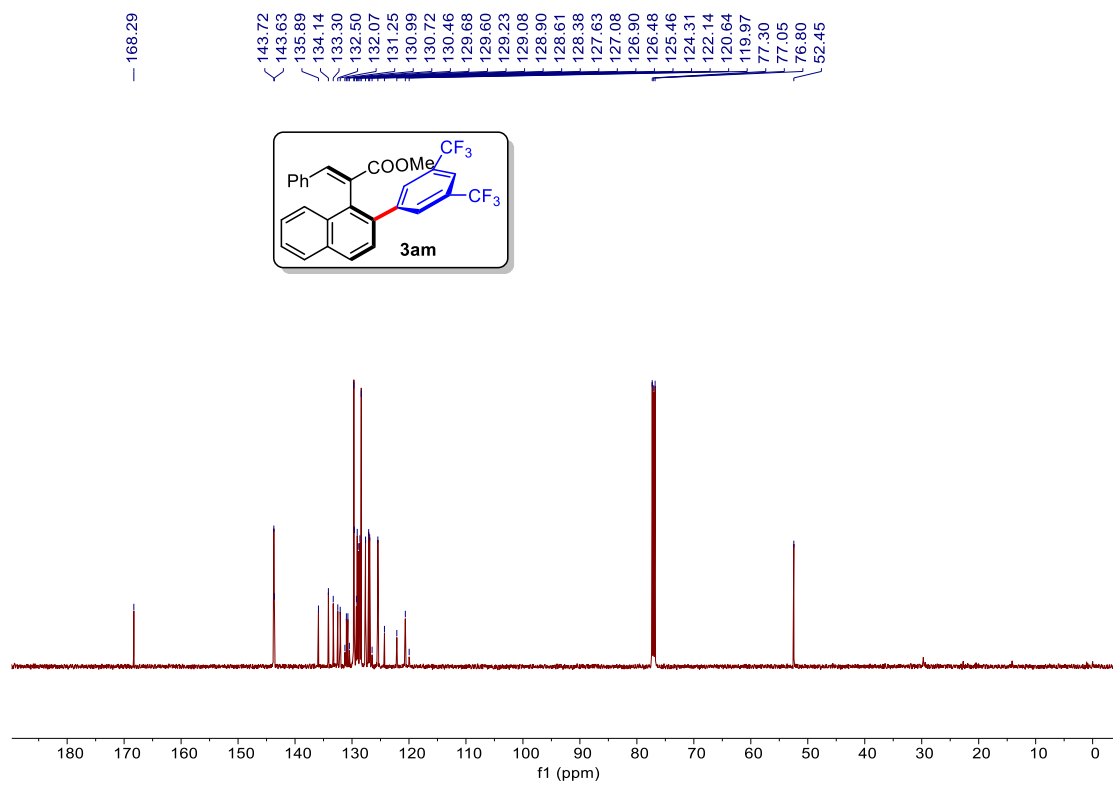

<sup>13</sup>C NMR Spectrum of **3am** (CDCl<sub>3</sub>, 126 MHz)

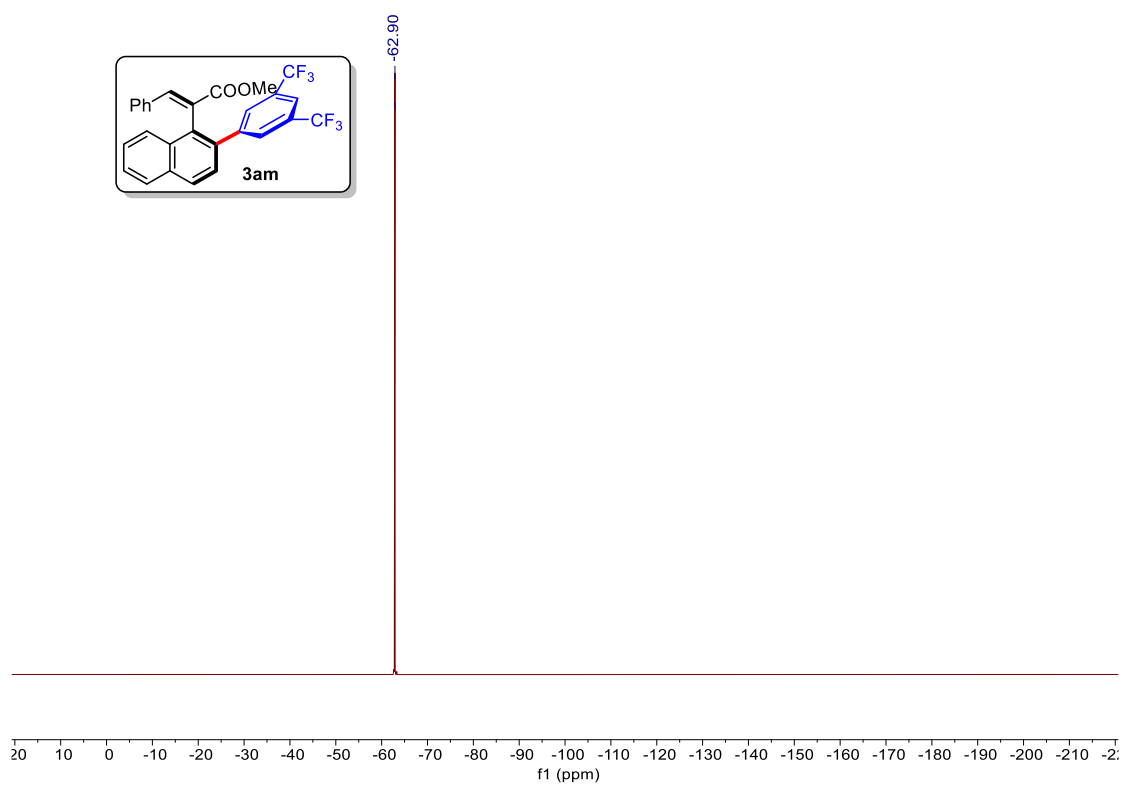

<sup>19</sup>F NMR Spectrum of **3am** (CDCl<sub>3</sub>, 126 MHz)



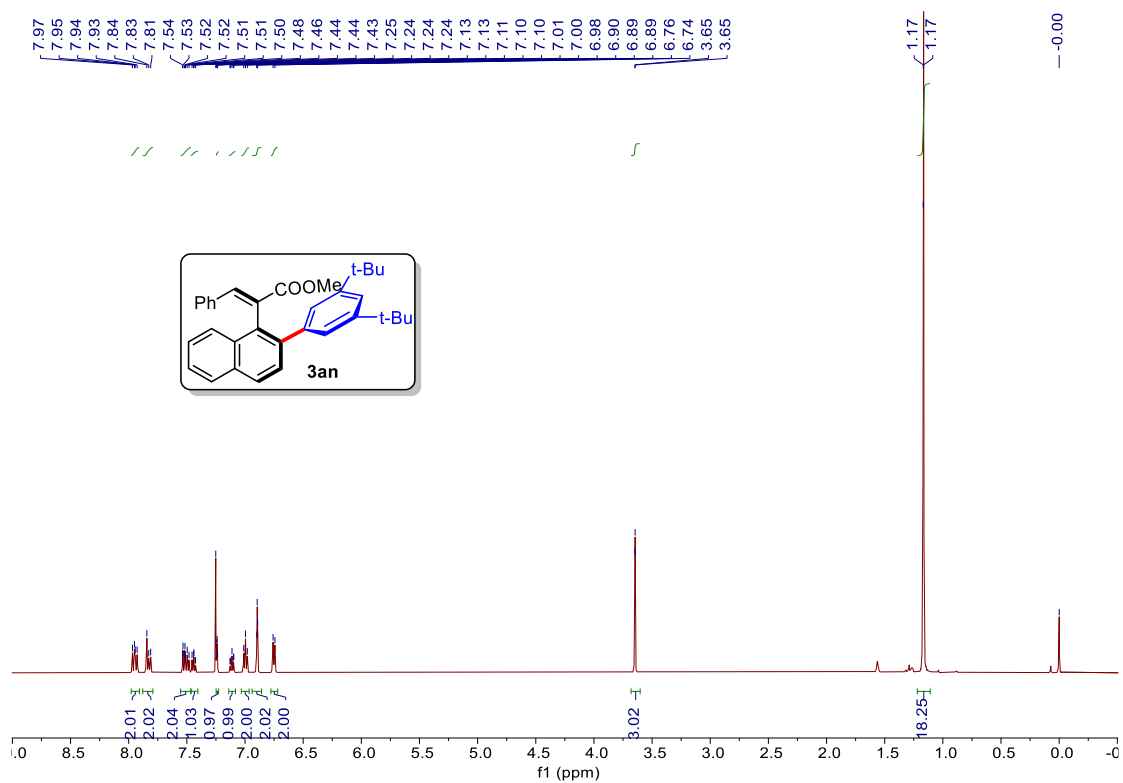

**<sup>1</sup>H NMR Spectrum of 3an (CDCl<sub>3</sub>, 500 MHz)**

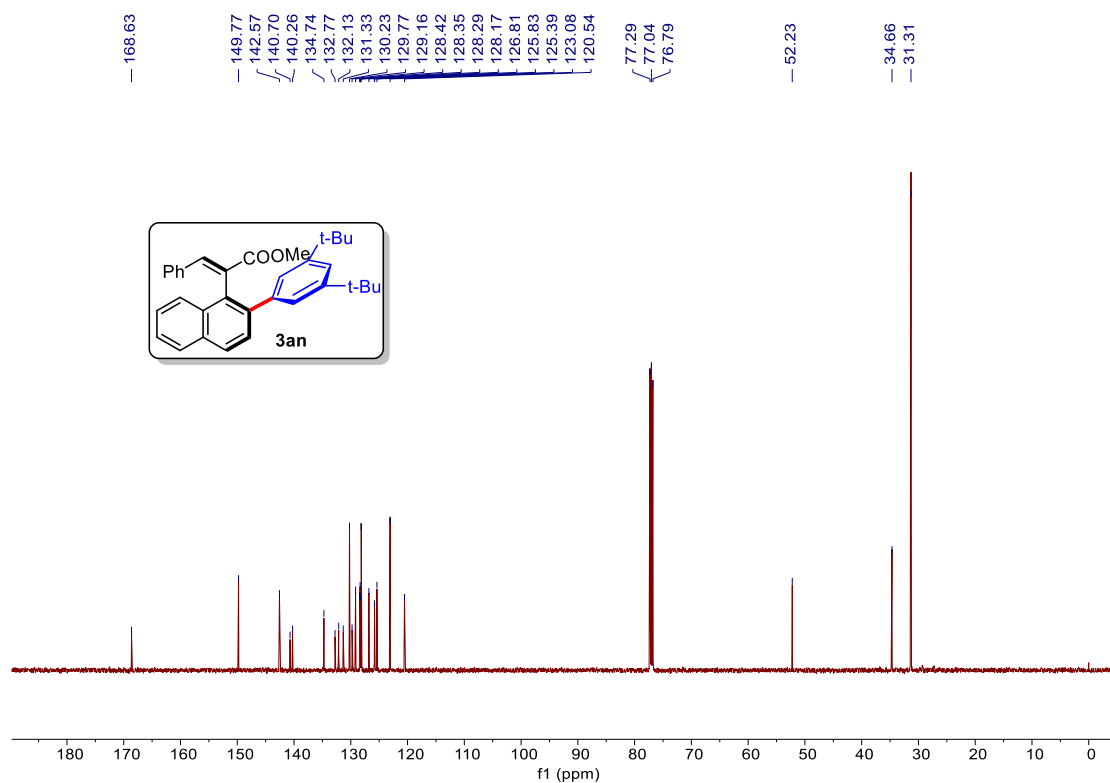

**<sup>13</sup>C NMR Spectrum of 3an (CDCl<sub>3</sub>, 126 MHz)**

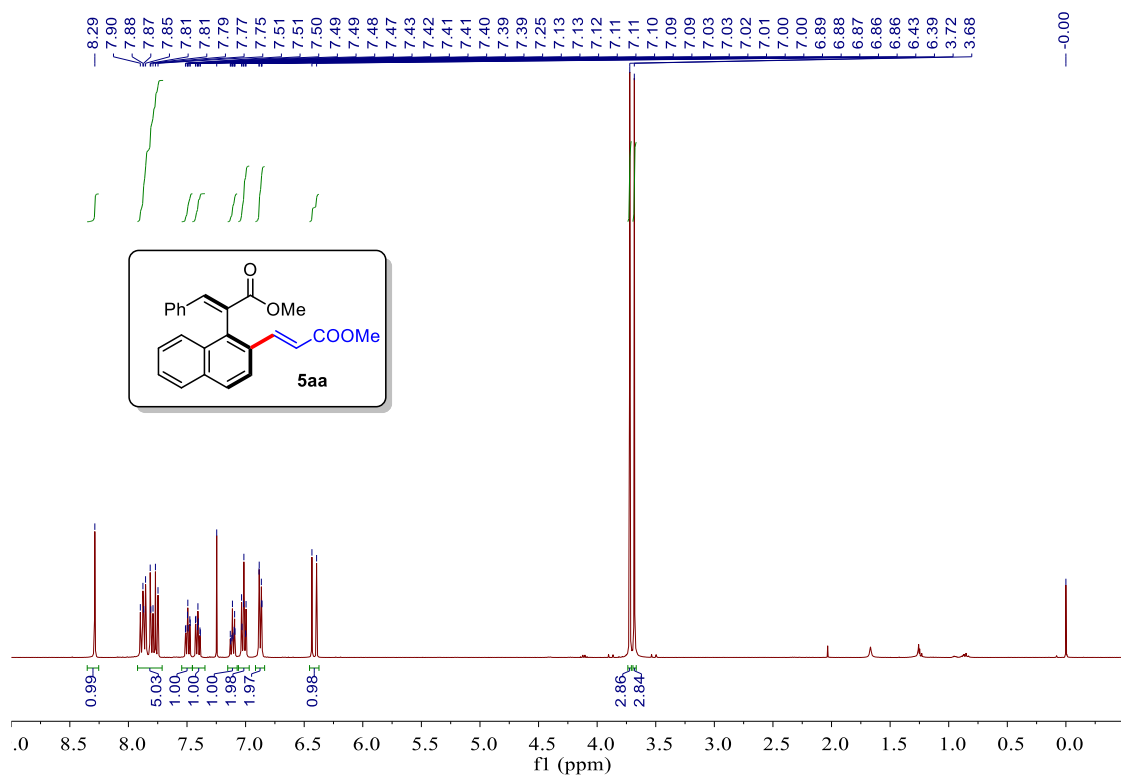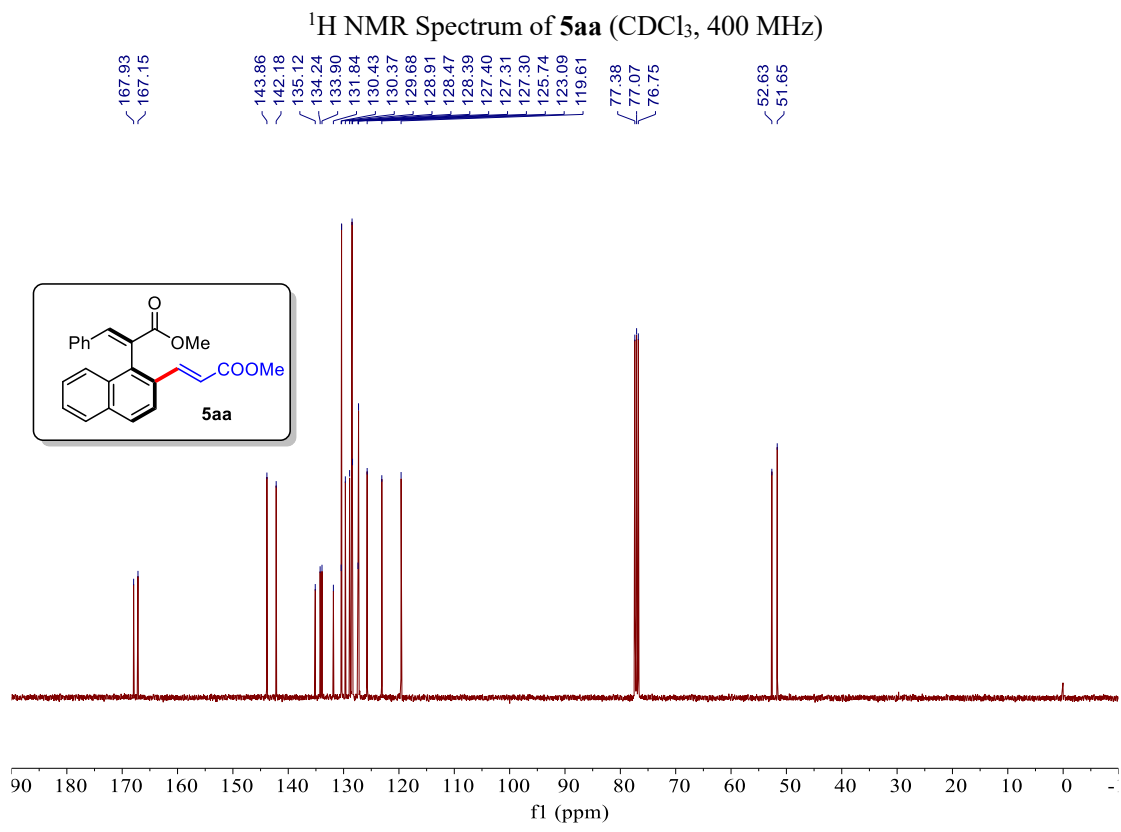

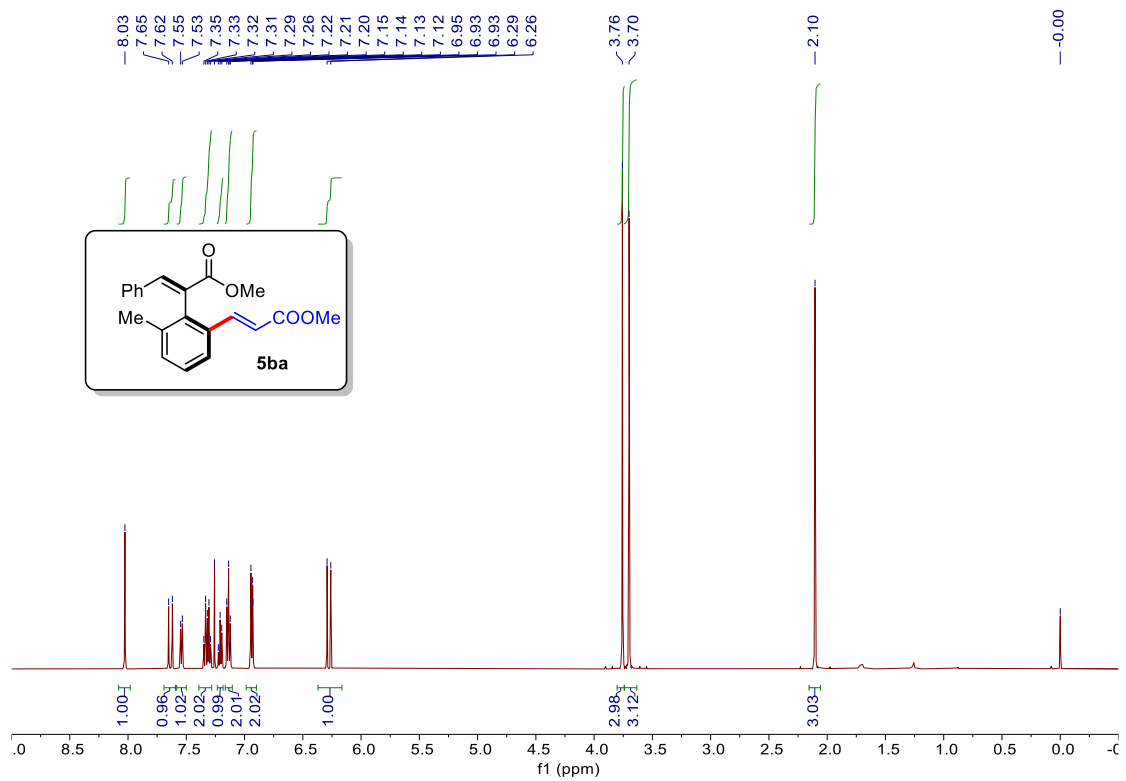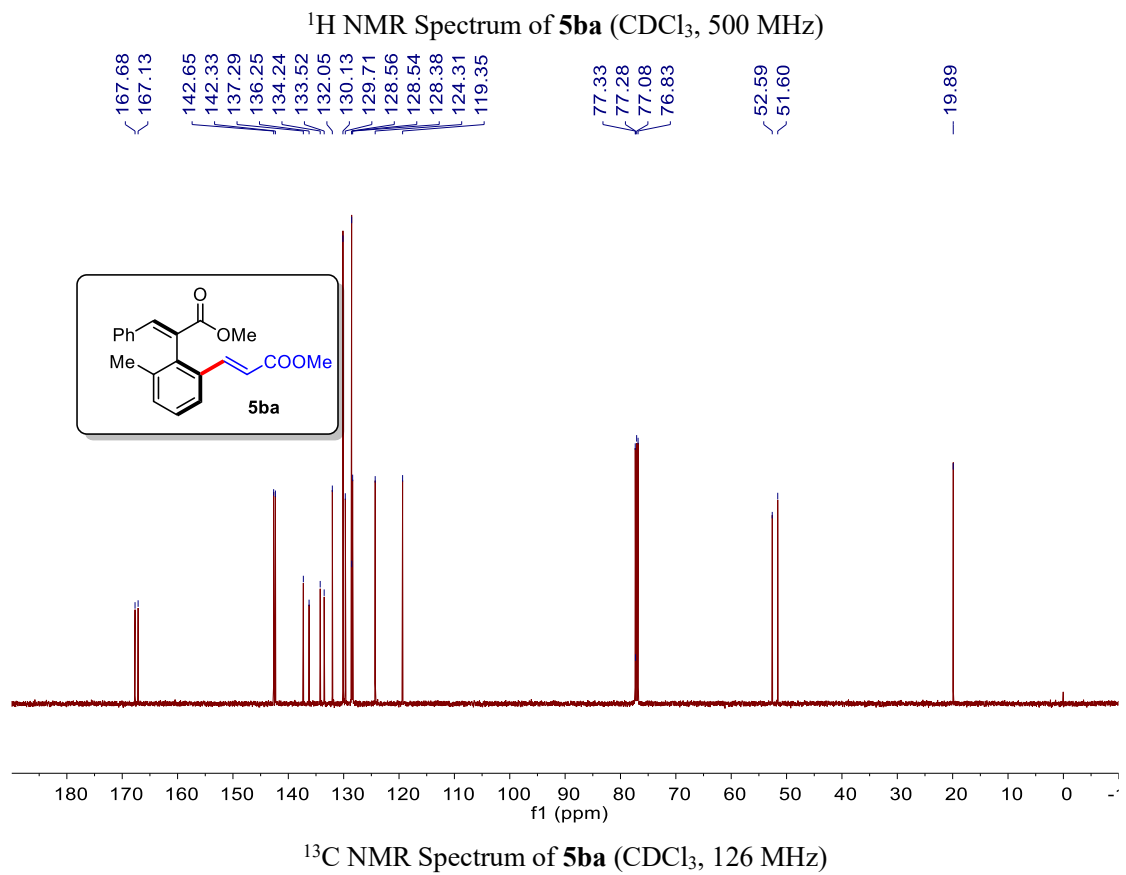

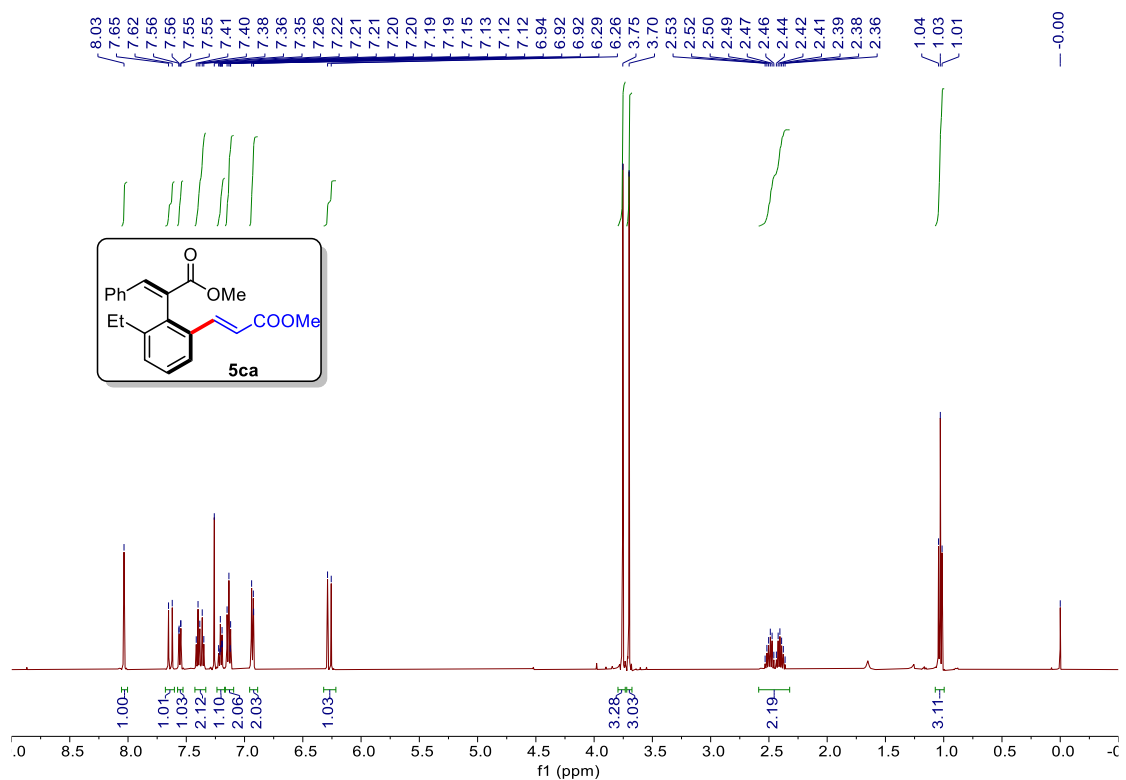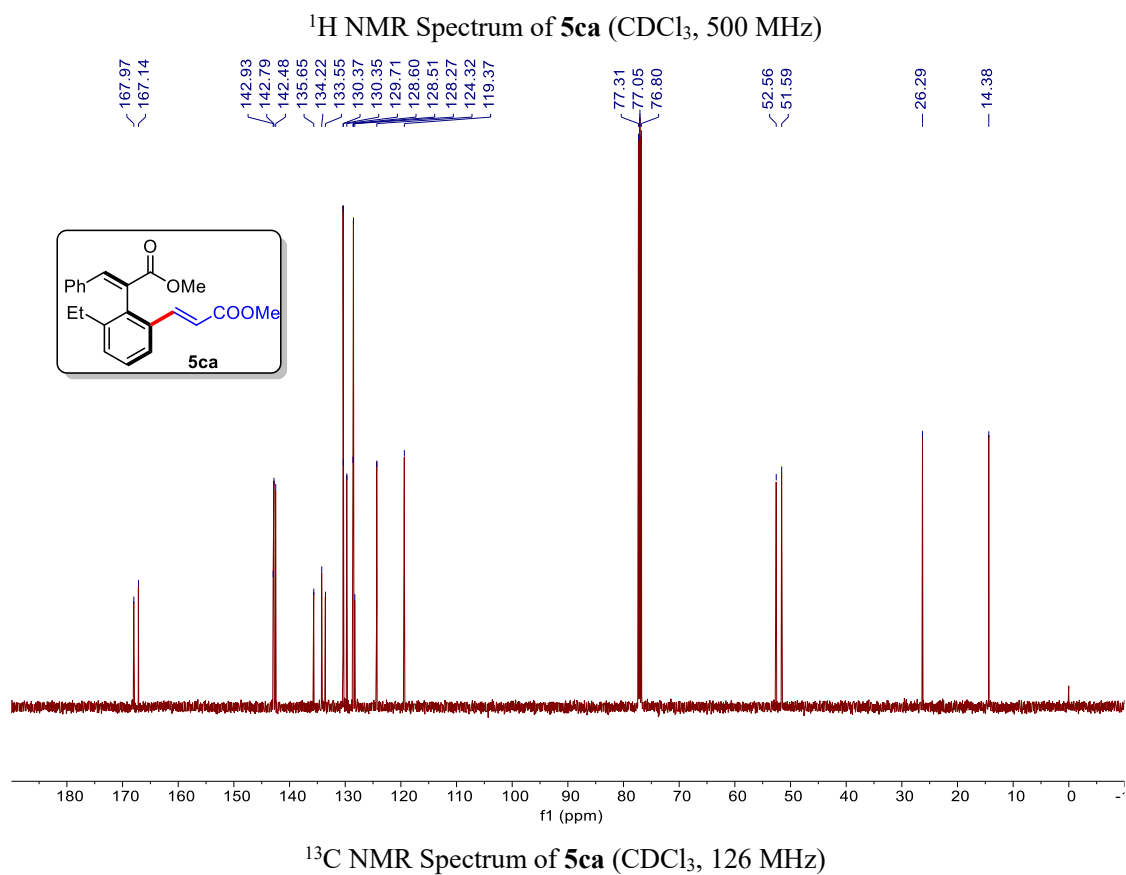

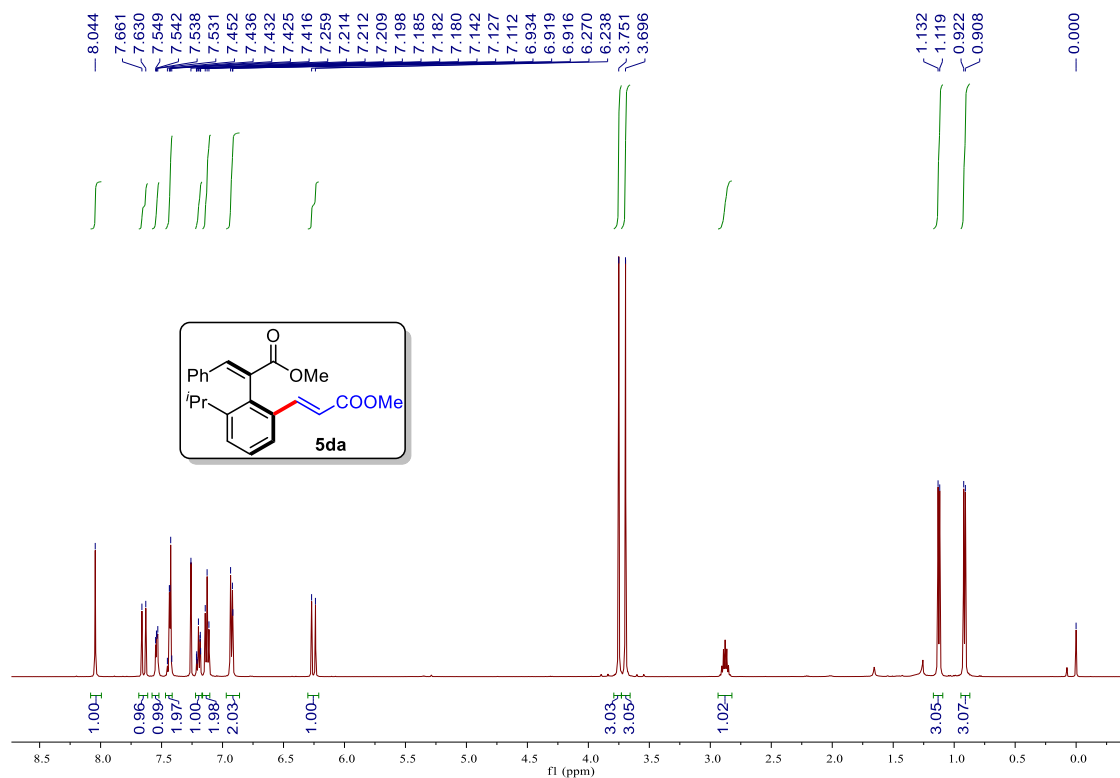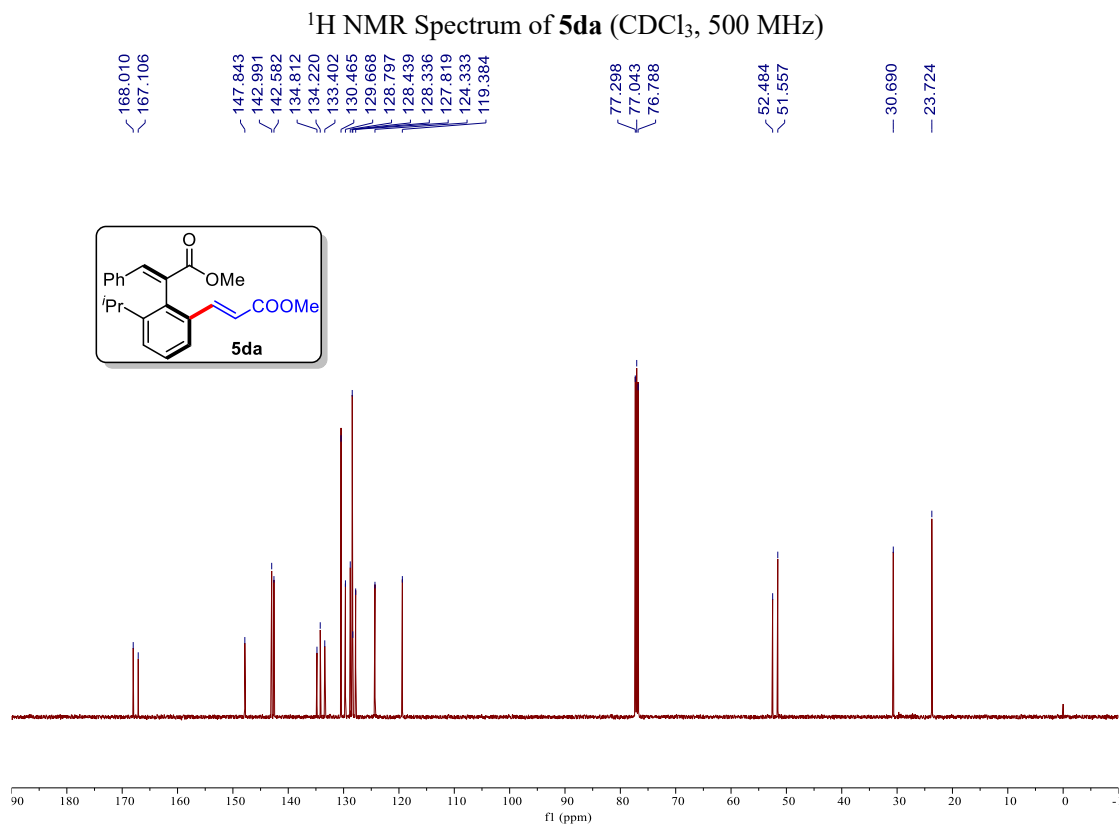

**<sup>13</sup>C NMR Spectrum of 5da (CDCl<sub>3</sub>, 126 MHz)**

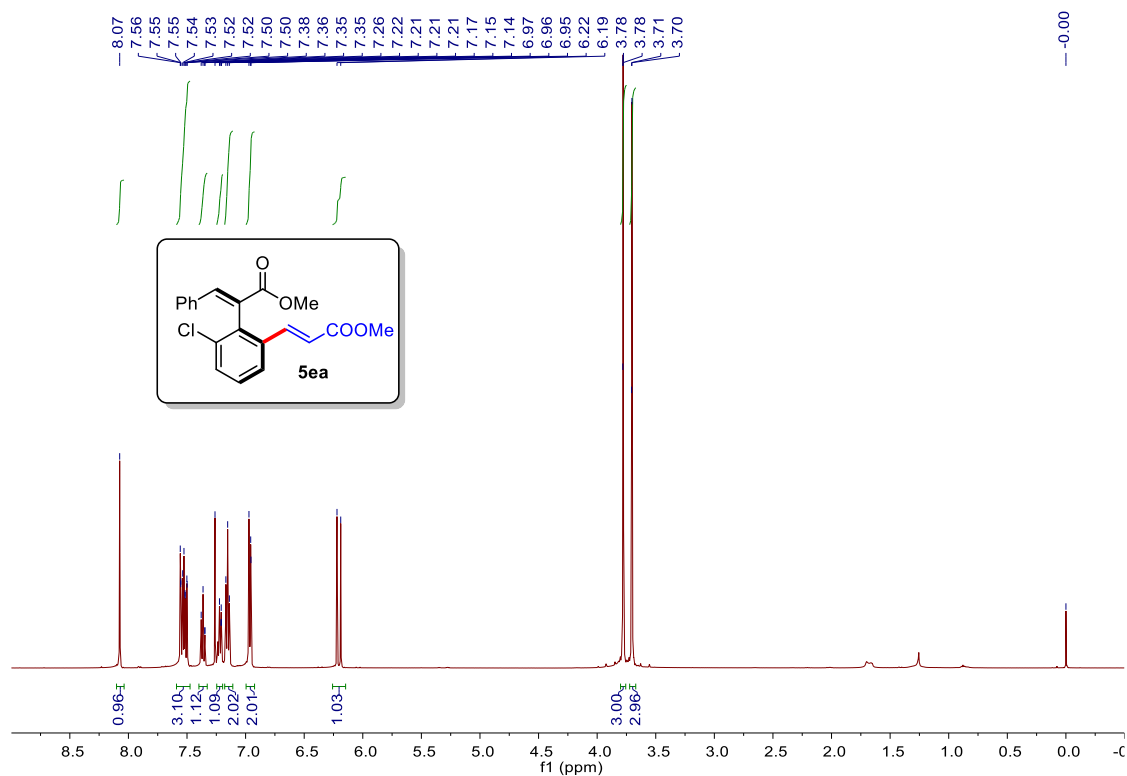

**<sup>1</sup>H NMR Spectrum of 5ea (CDCl<sub>3</sub>, 500 MHz)**

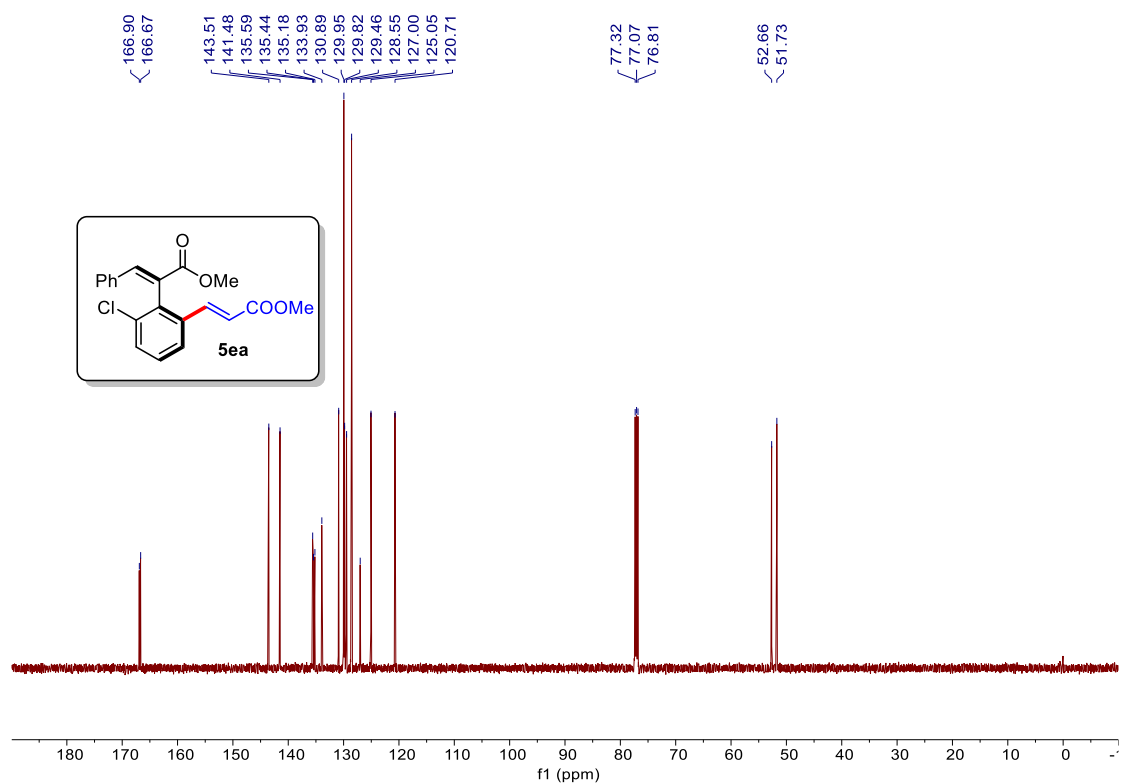

**<sup>13</sup>C NMR Spectrum of 5ea (CDCl<sub>3</sub>, 126 MHz)**

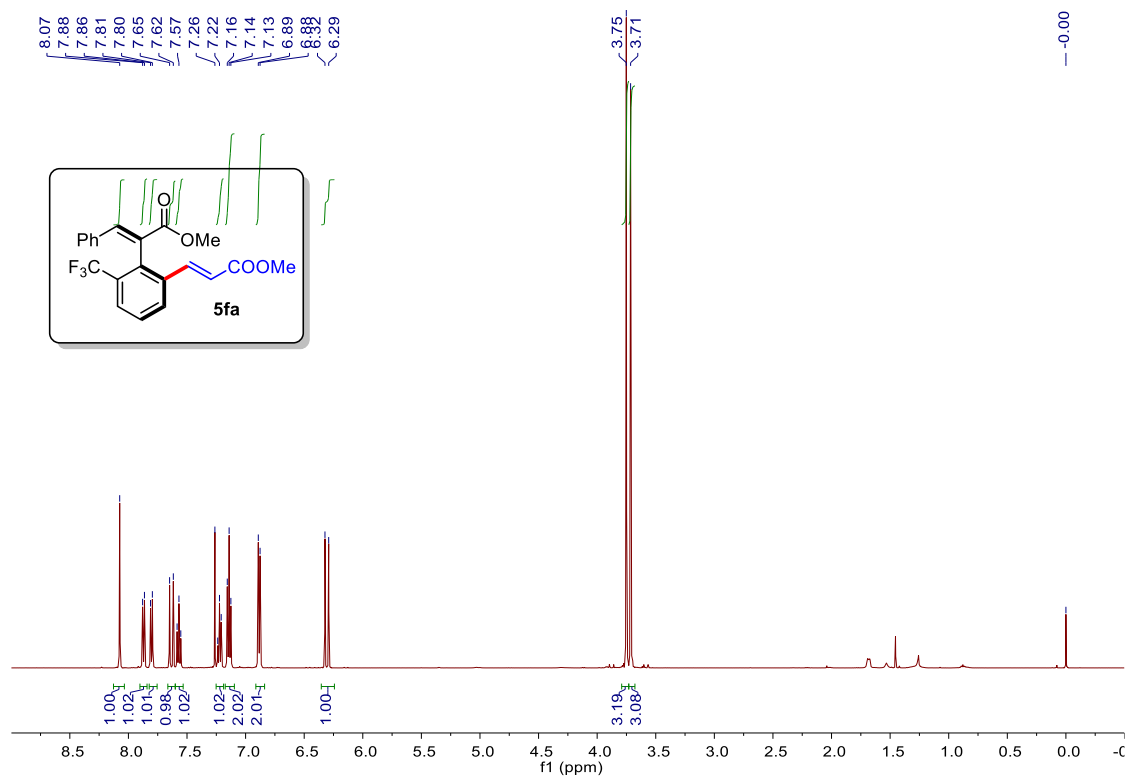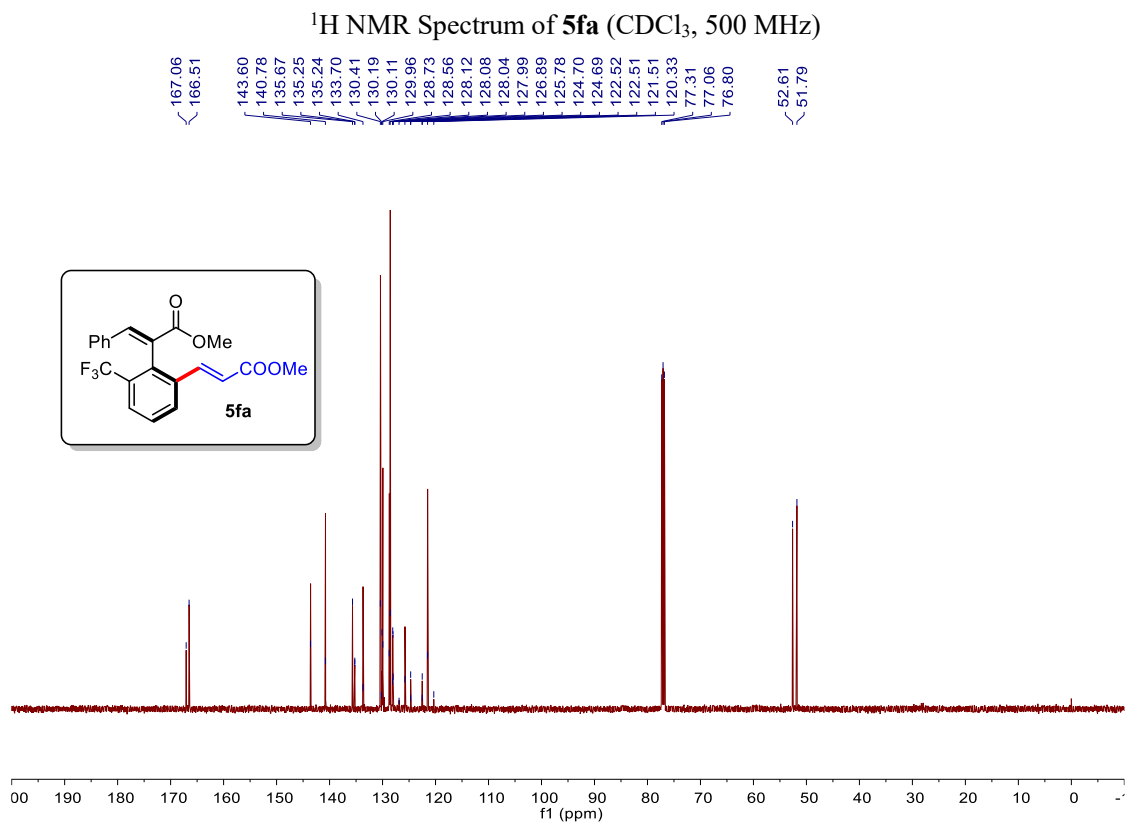

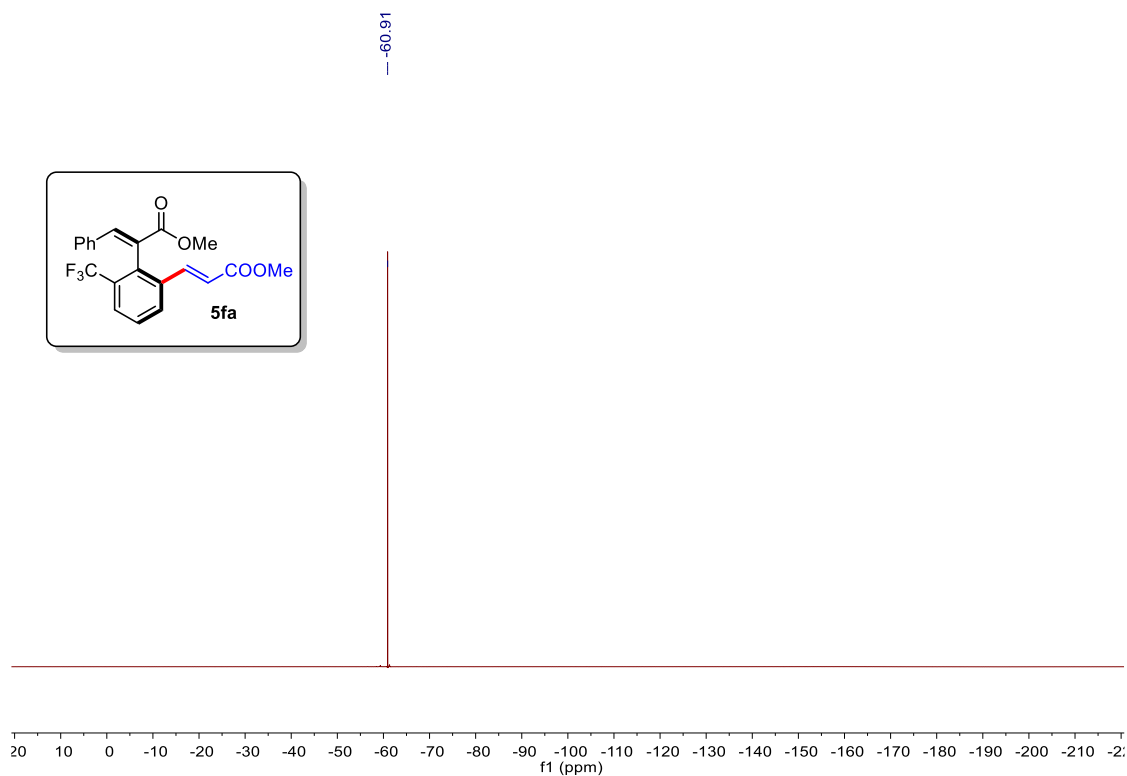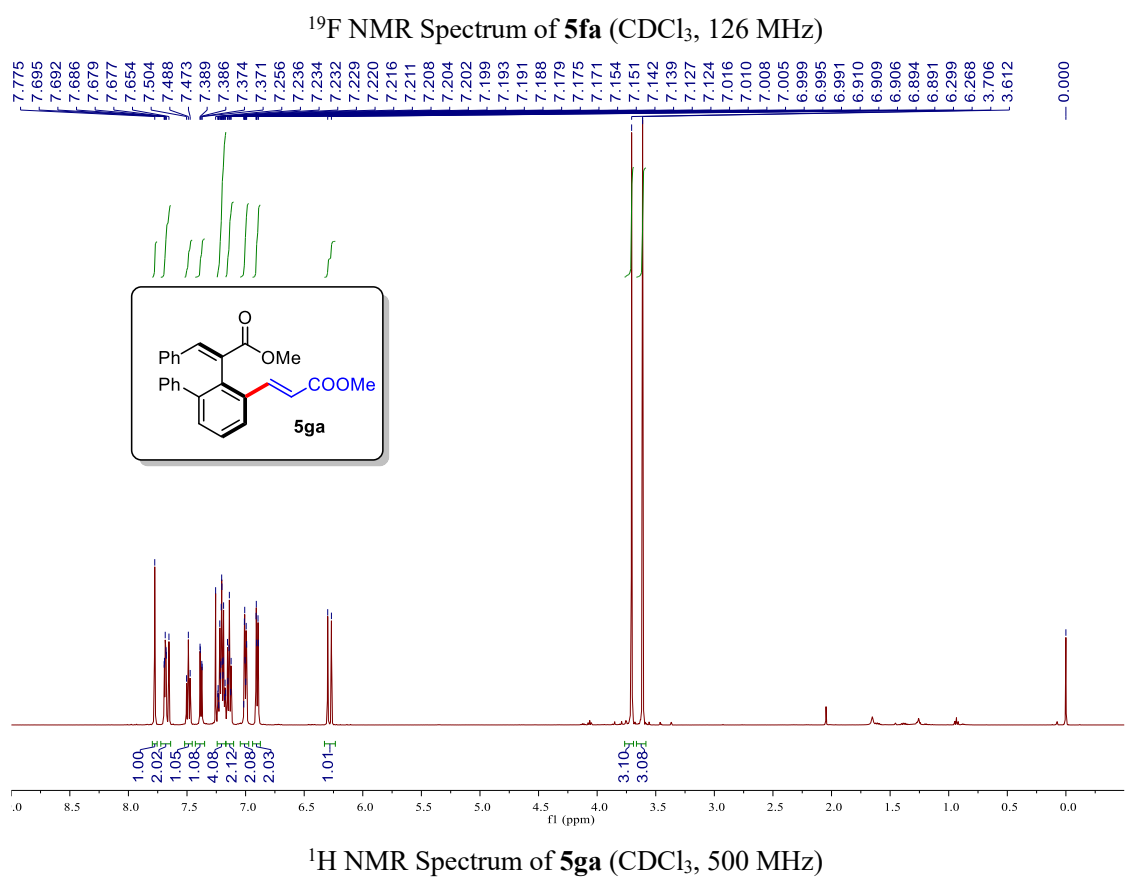



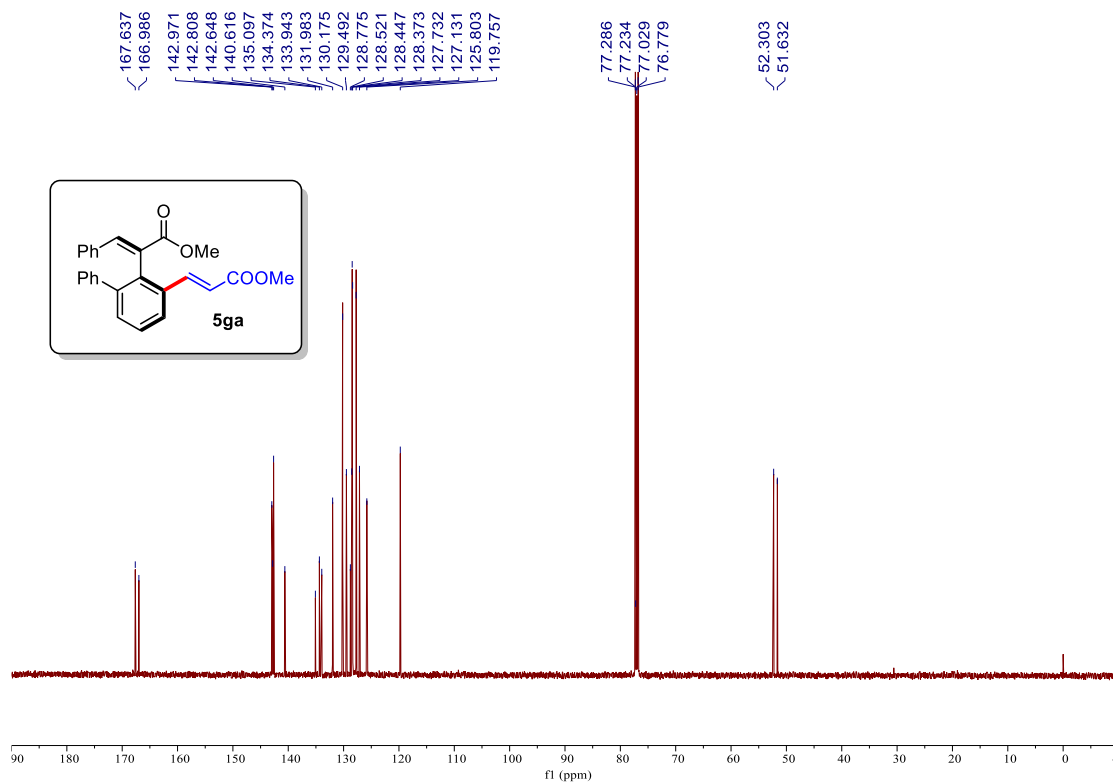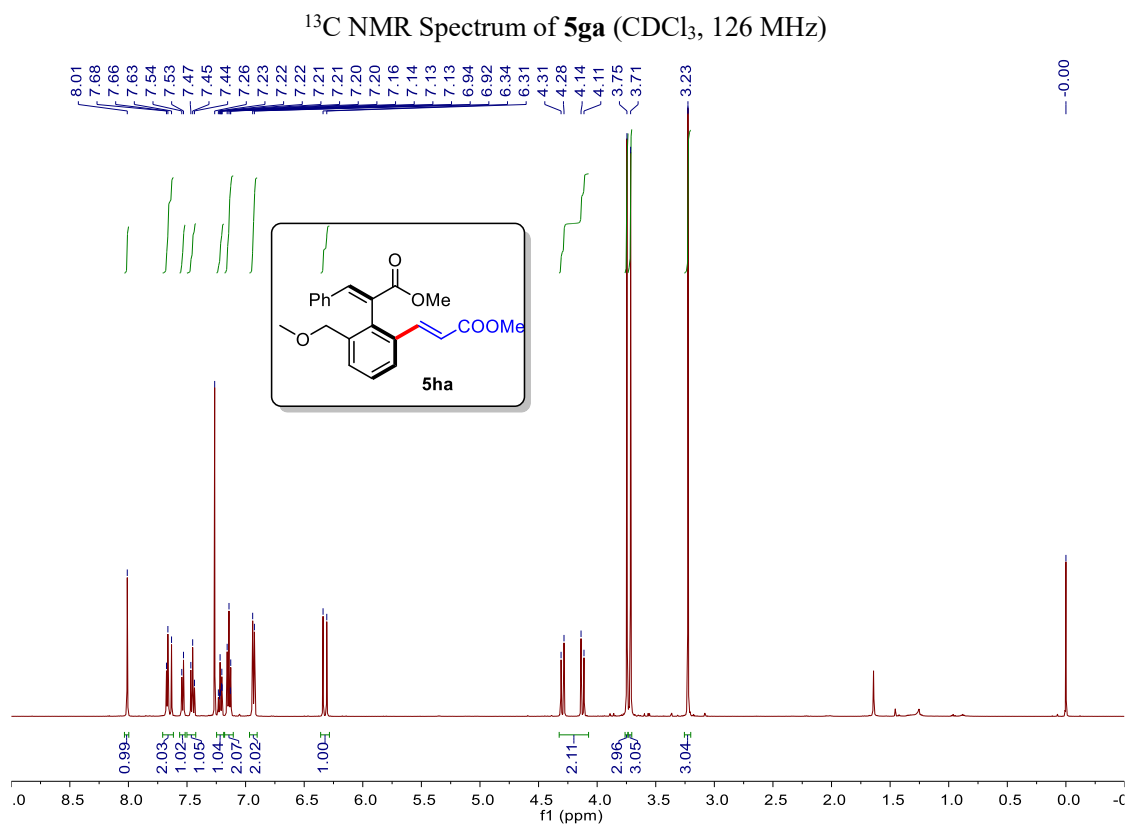

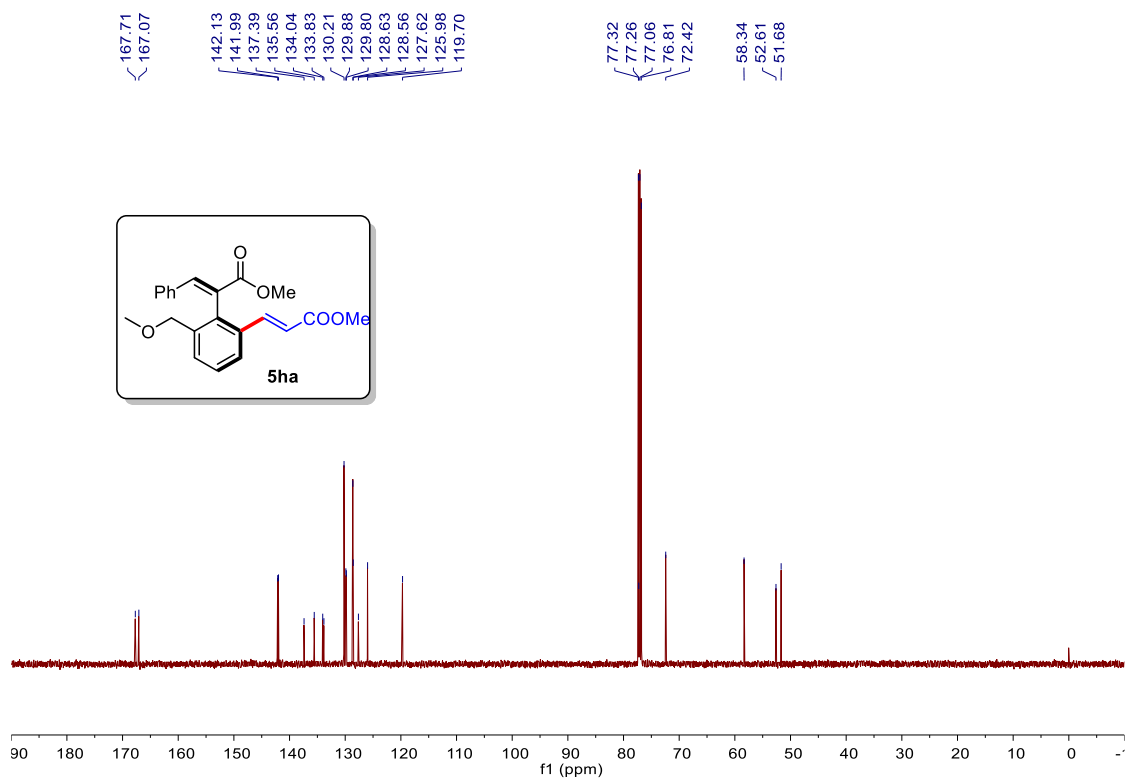

<sup>13</sup>C NMR Spectrum of **5ha** (CDCl<sub>3</sub>, 126 MHz)

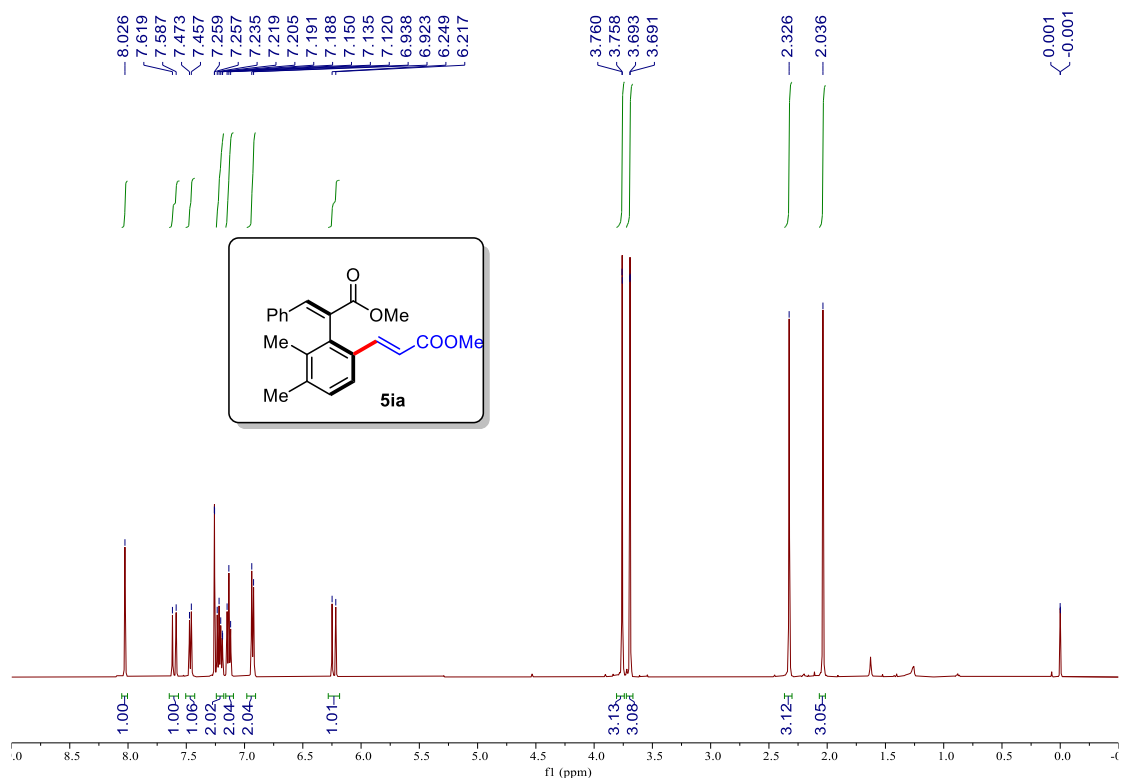

<sup>1</sup>H NMR Spectrum of **5ia** (CDCl<sub>3</sub>, 500 MHz)

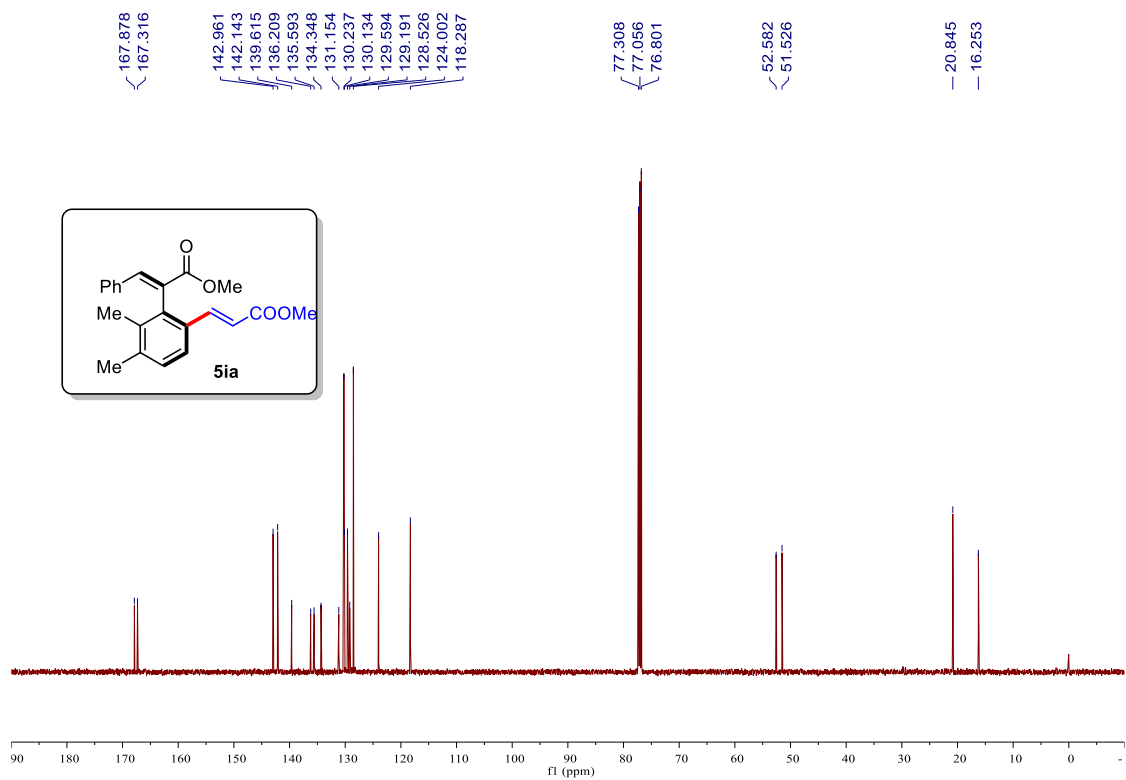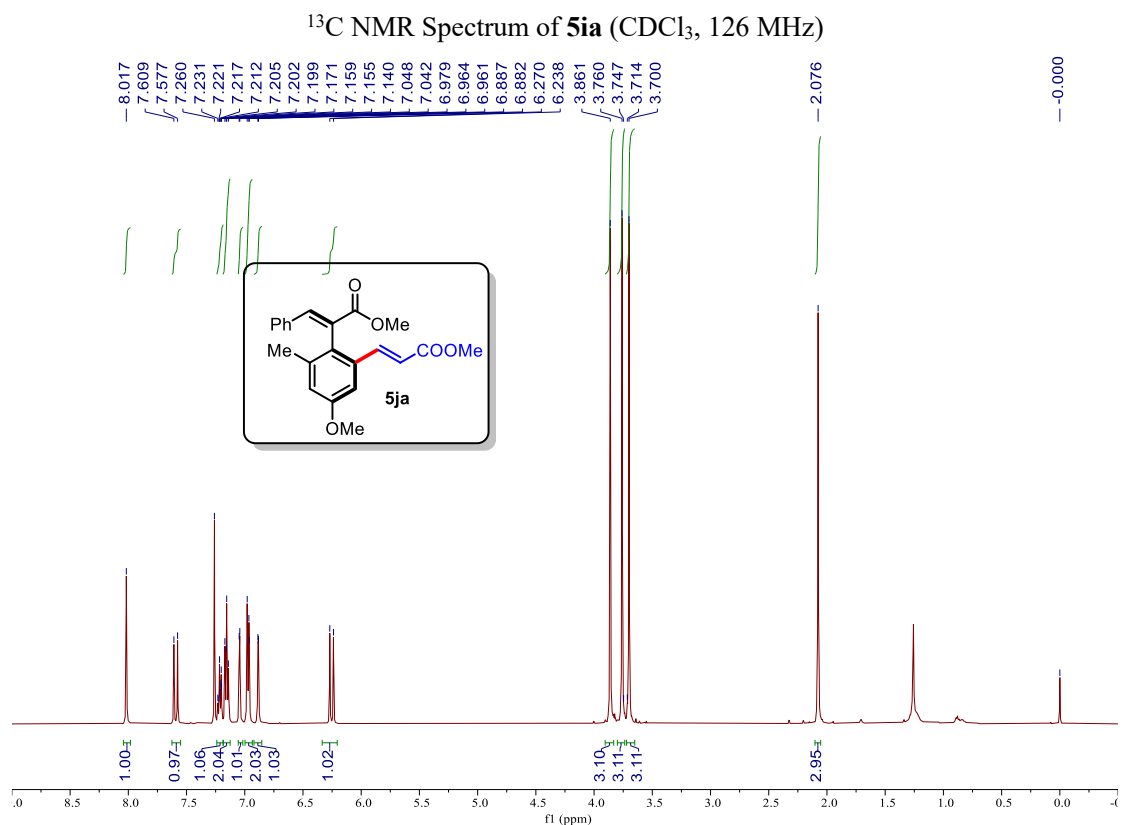

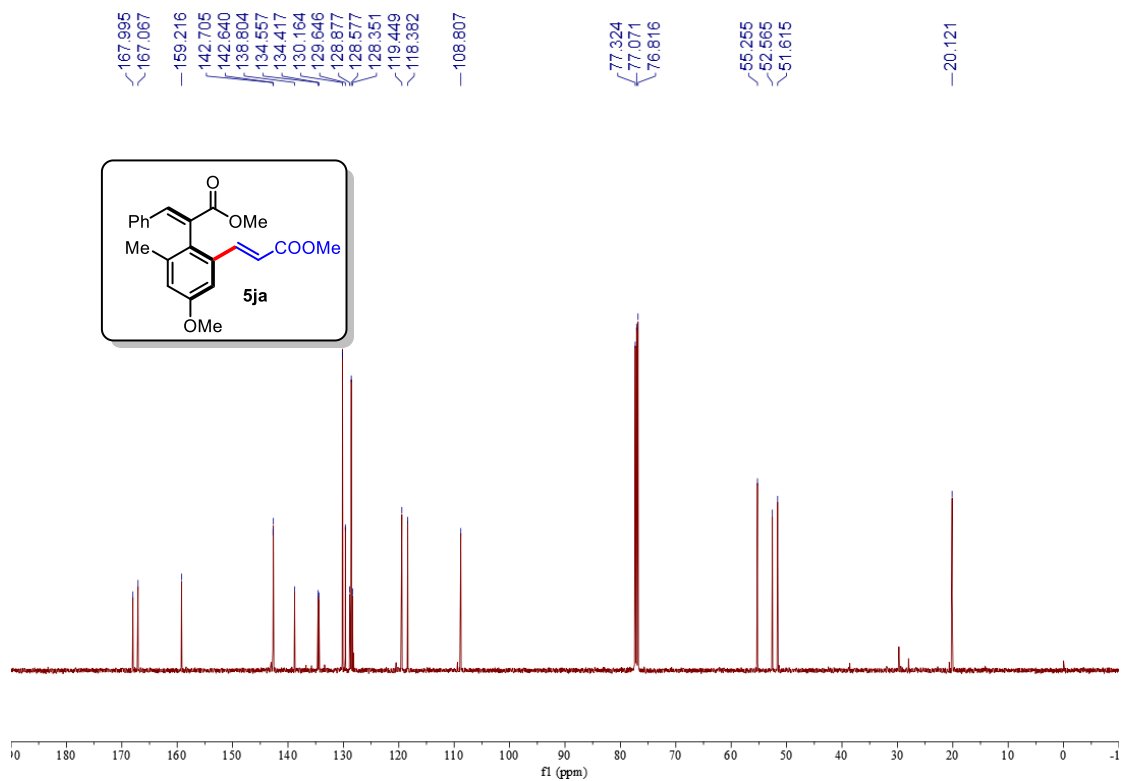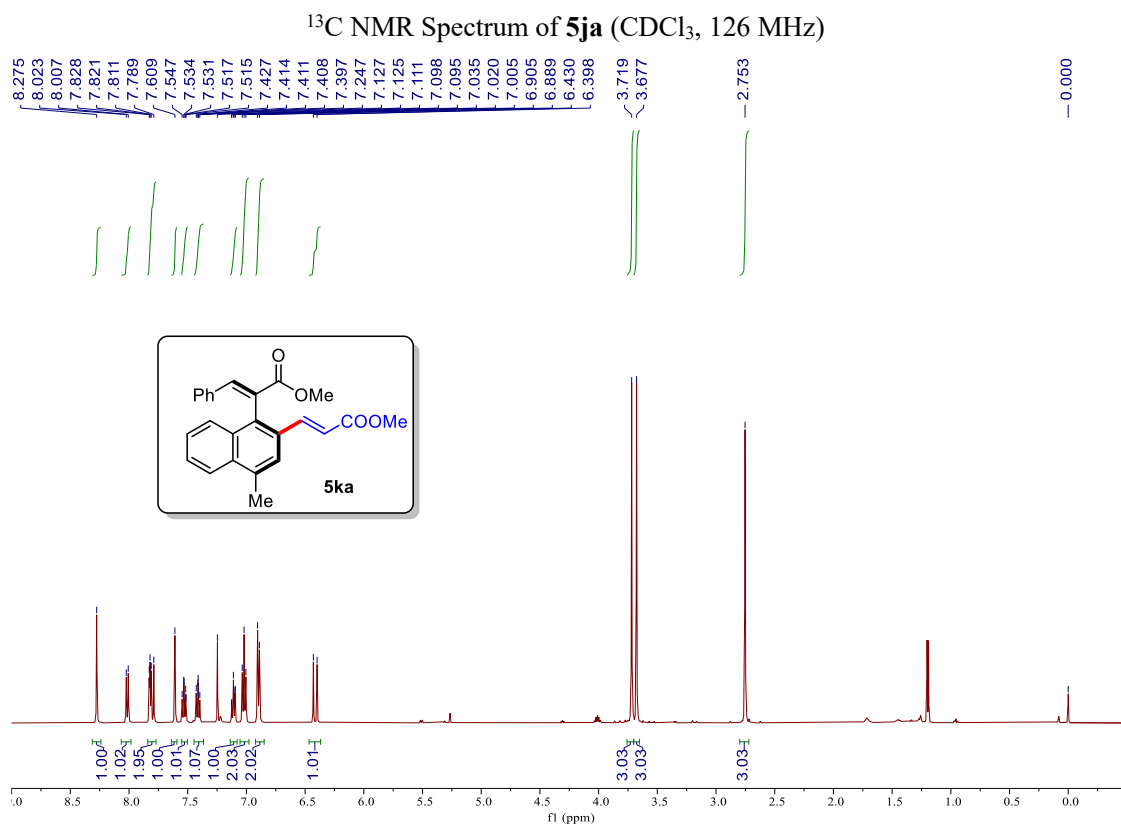

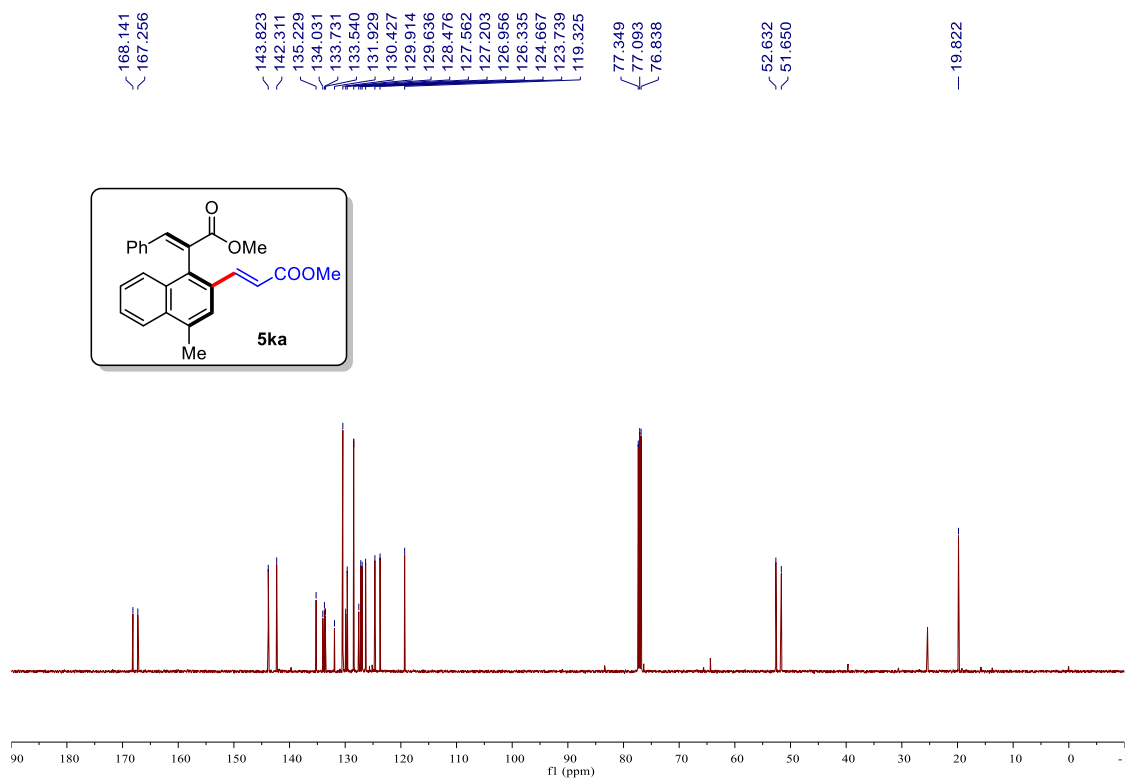

<sup>13</sup>C NMR Spectrum of **5ka** (CDCl<sub>3</sub>, 126 MHz)

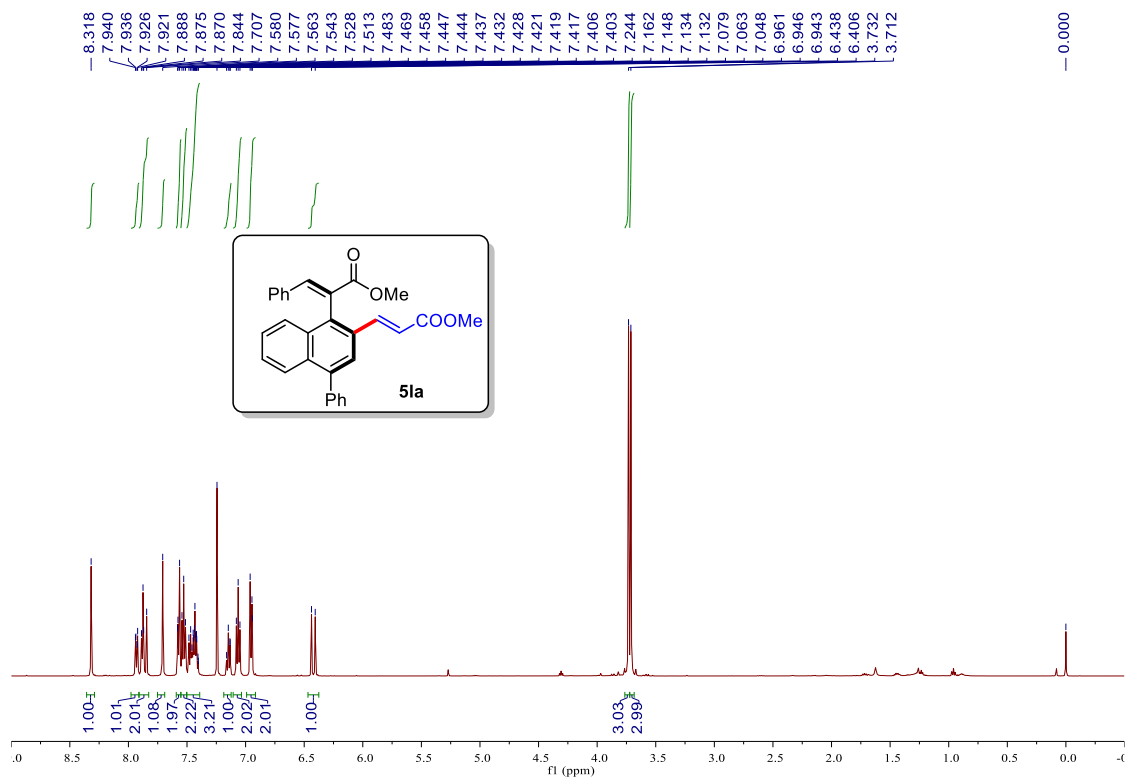

<sup>1</sup>H NMR Spectrum of **5la** (CDCl<sub>3</sub>, 500 MHz)

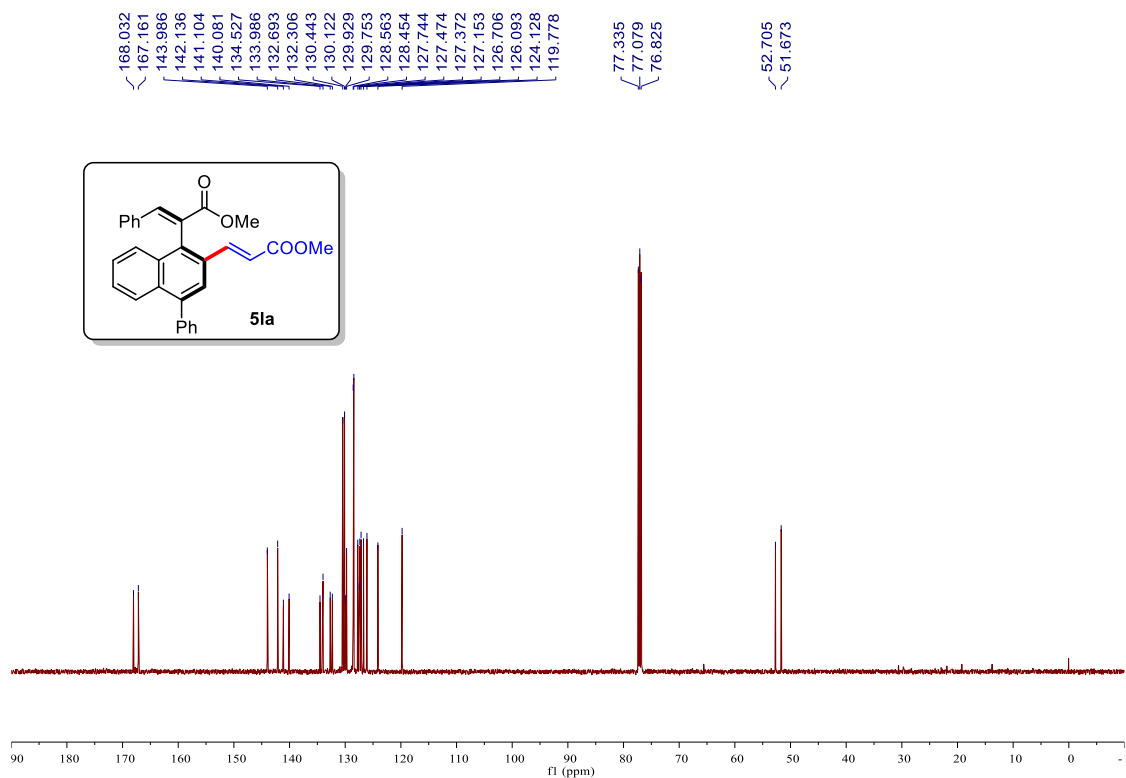

<sup>13</sup>C NMR Spectrum of **5la** (CDCl<sub>3</sub>, 126 MHz)

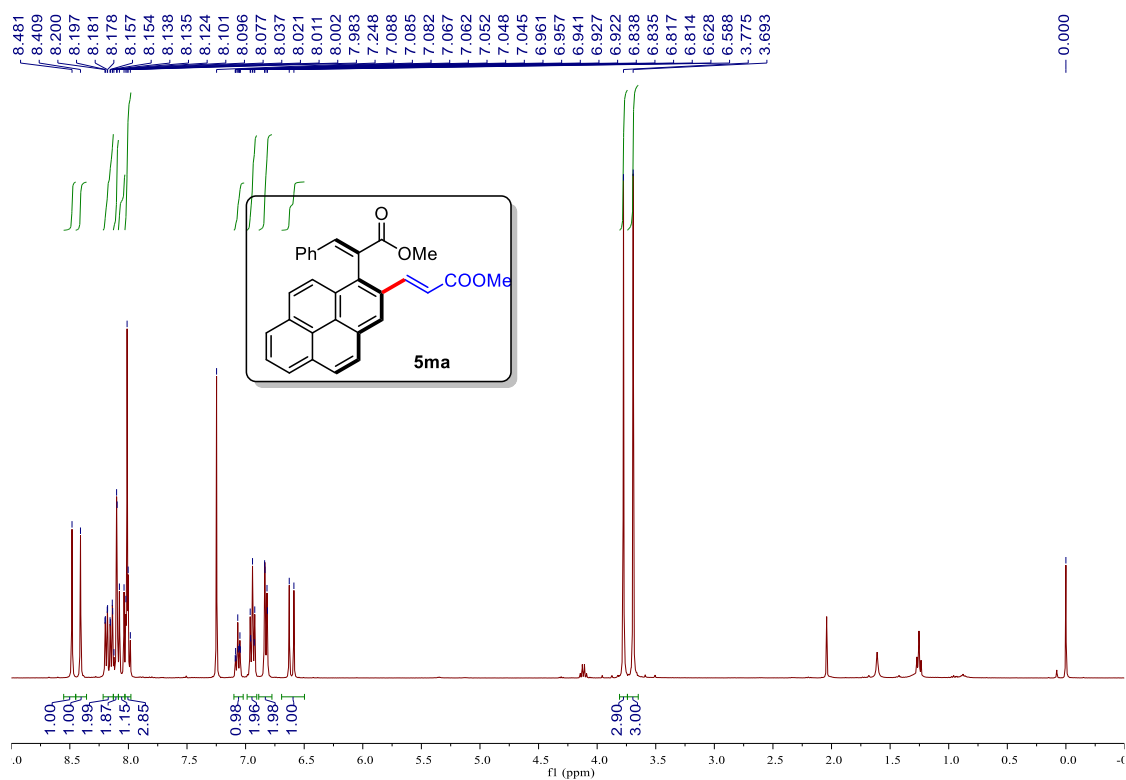

<sup>1</sup>H NMR Spectrum of **5ma** (CDCl<sub>3</sub>, 500 MHz)

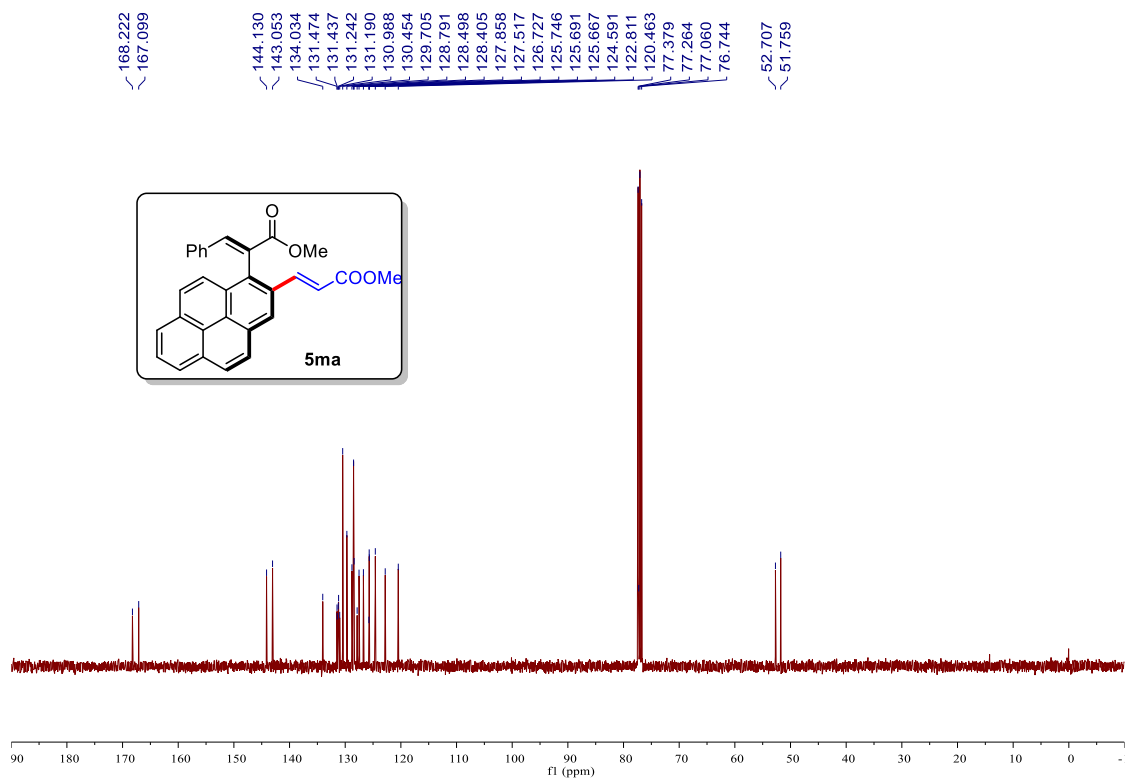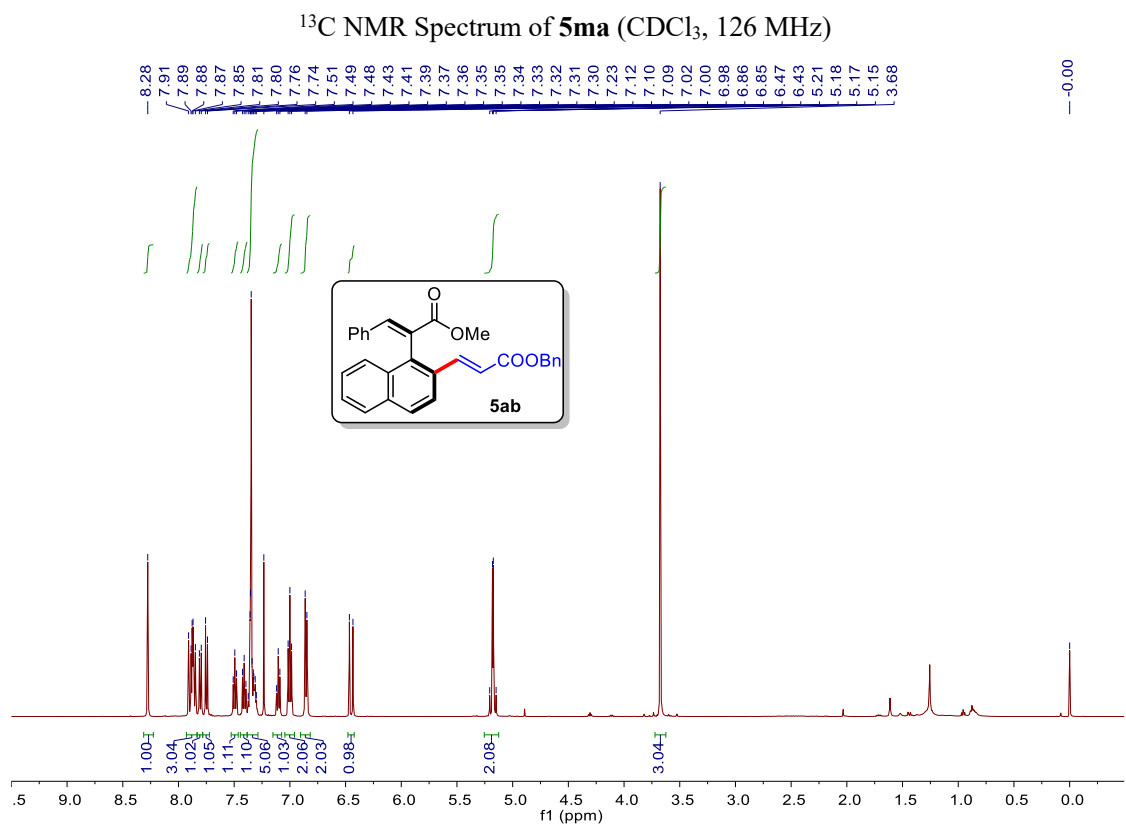

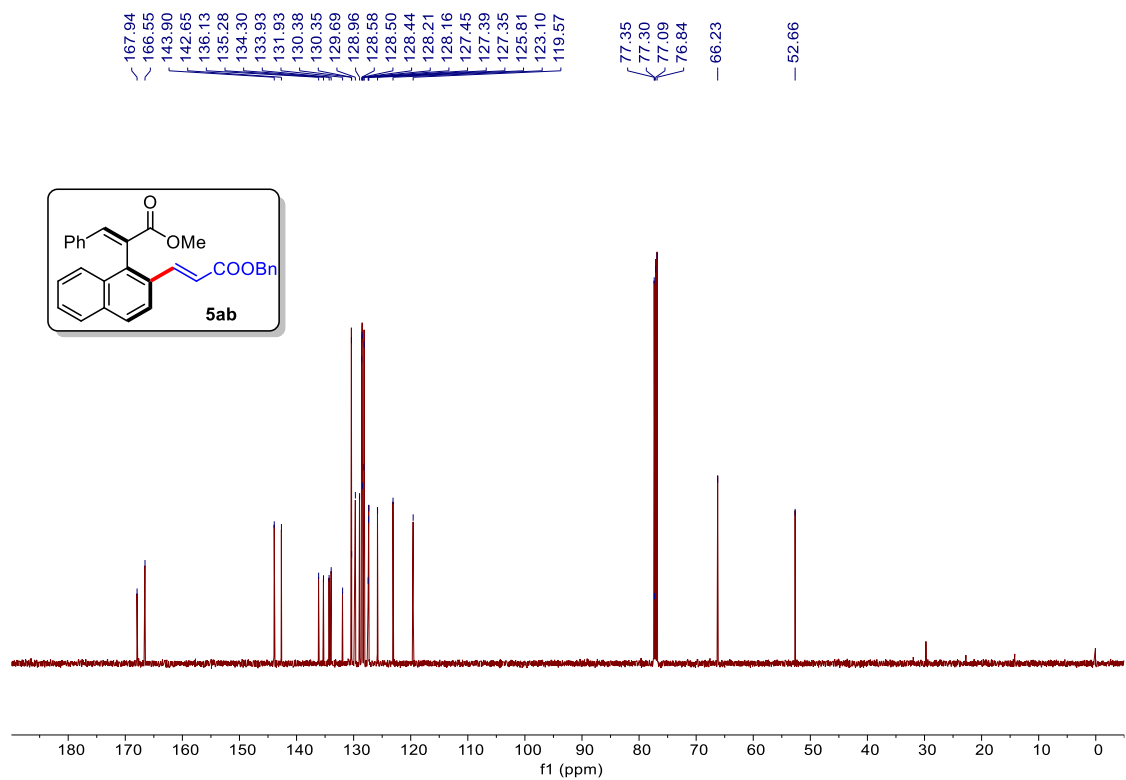

<sup>13</sup>C NMR Spectrum of **5ab** (CDCl<sub>3</sub>, 126 MHz)

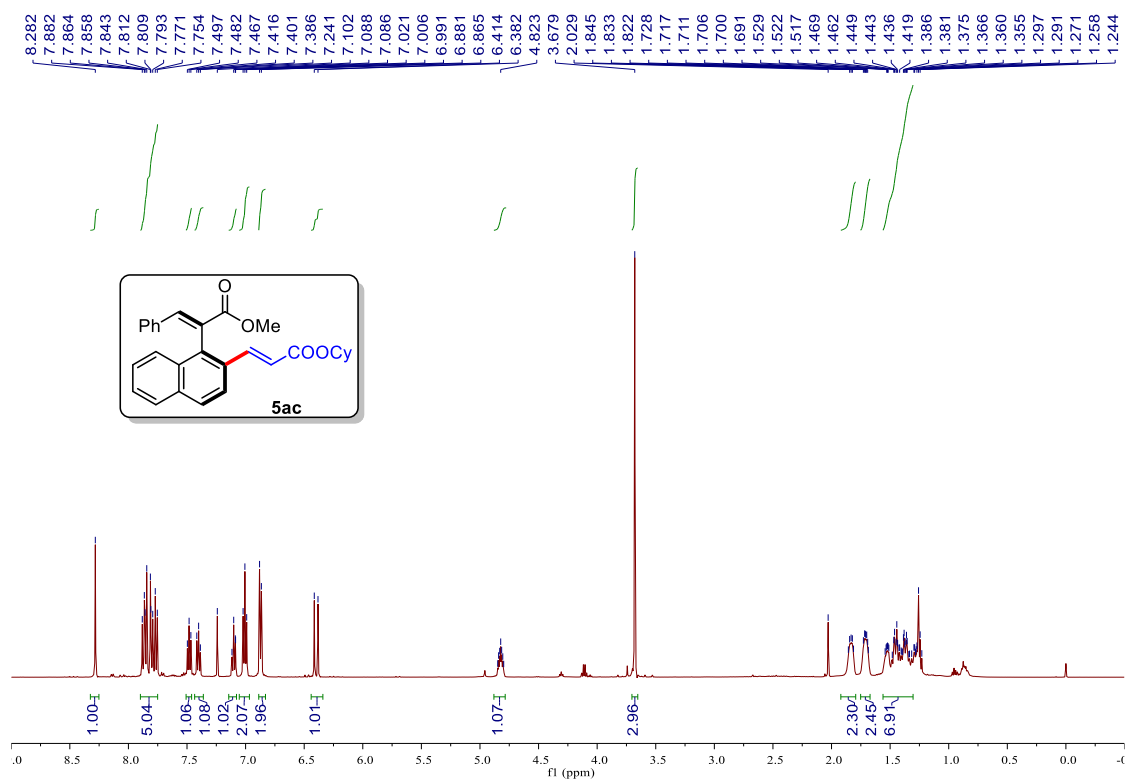

<sup>1</sup>H NMR Spectrum of **5ac** (CDCl<sub>3</sub>, 500 MHz)



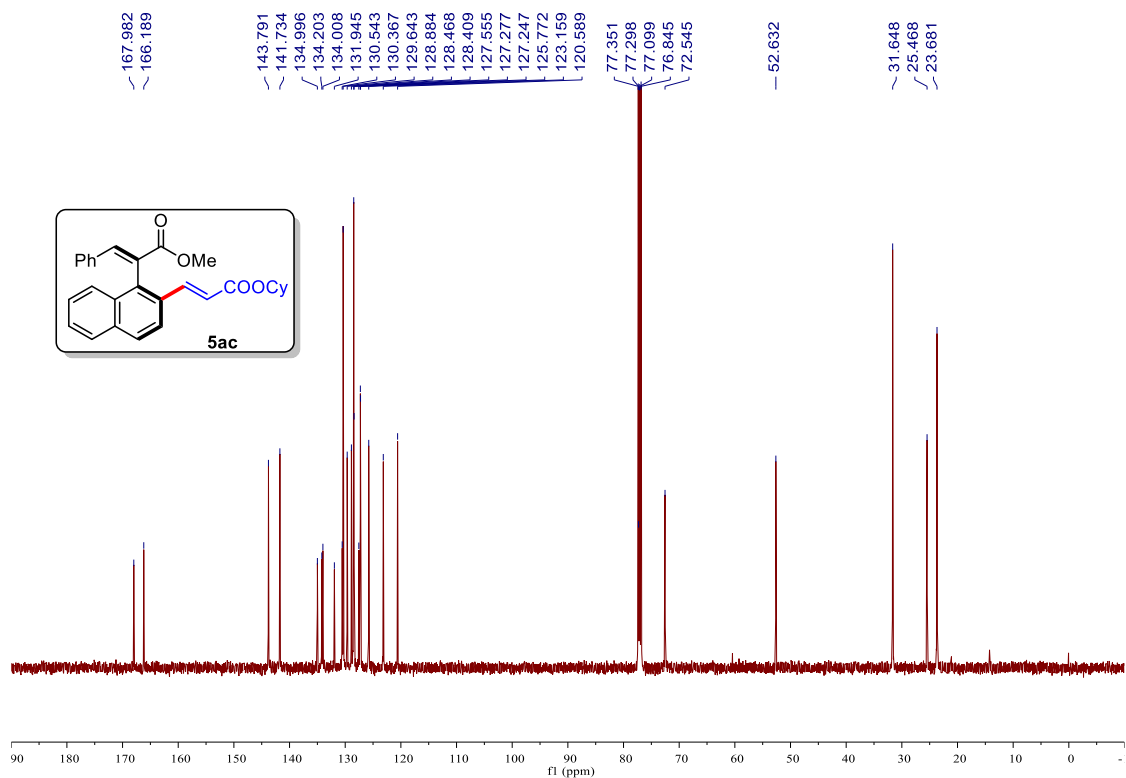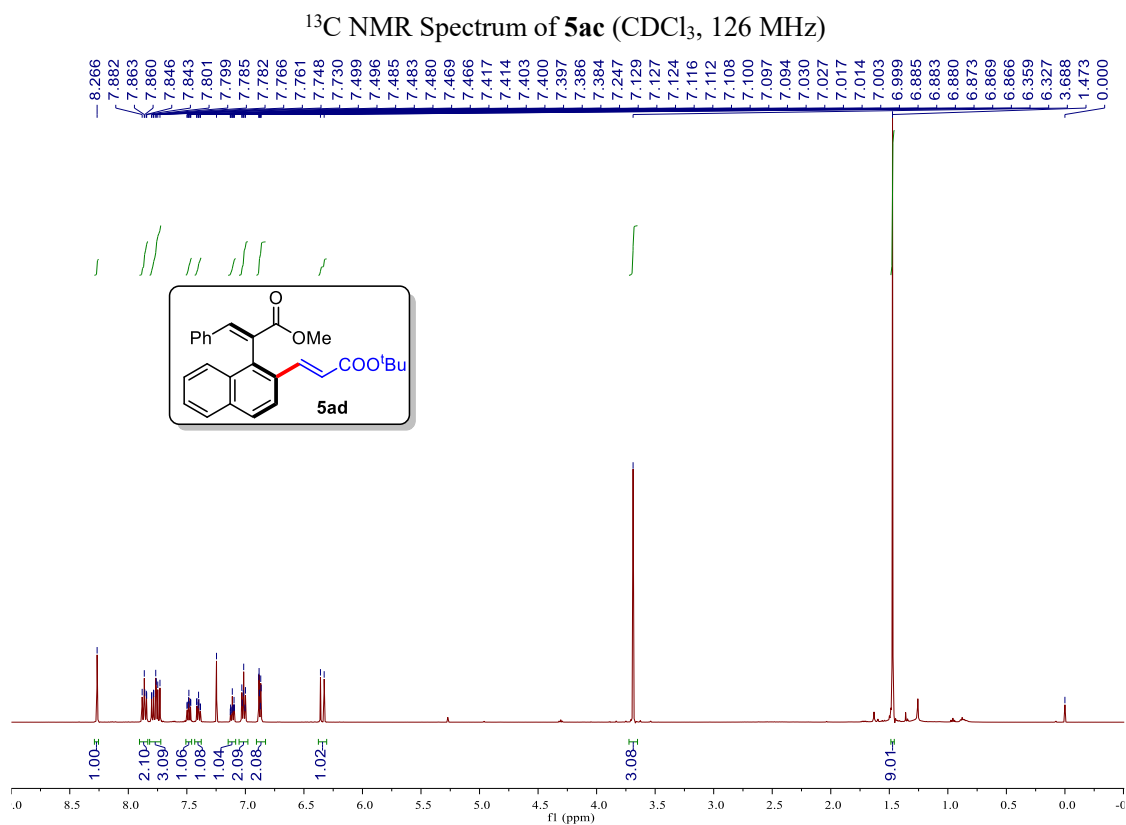

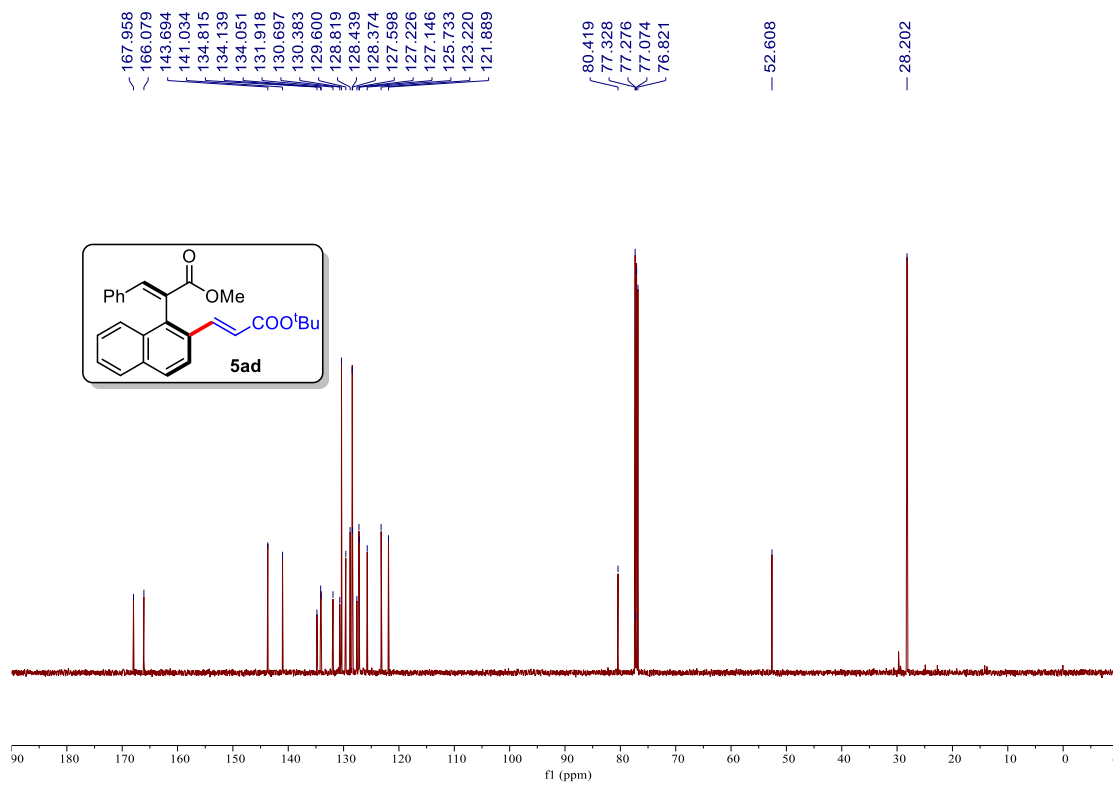

<sup>13</sup>C NMR Spectrum of **5ad** (CDCl<sub>3</sub>, 126 MHz)

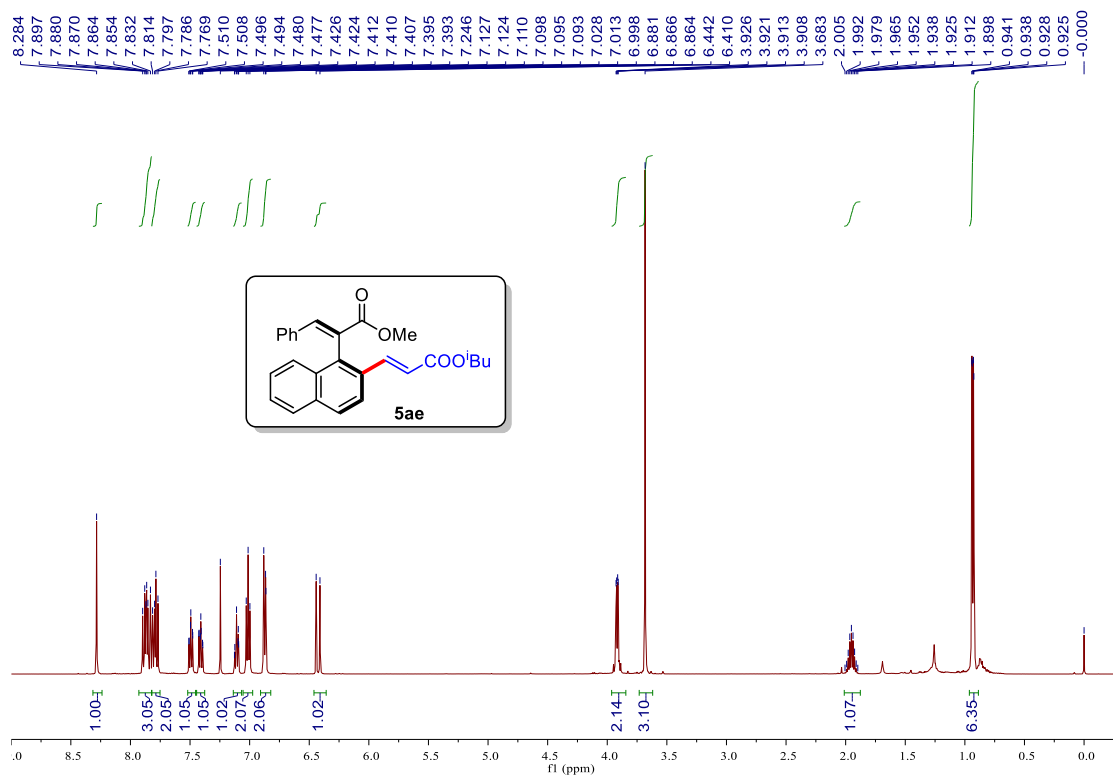

<sup>1</sup>H NMR Spectrum of **5ae** (CDCl<sub>3</sub>, 500 MHz)

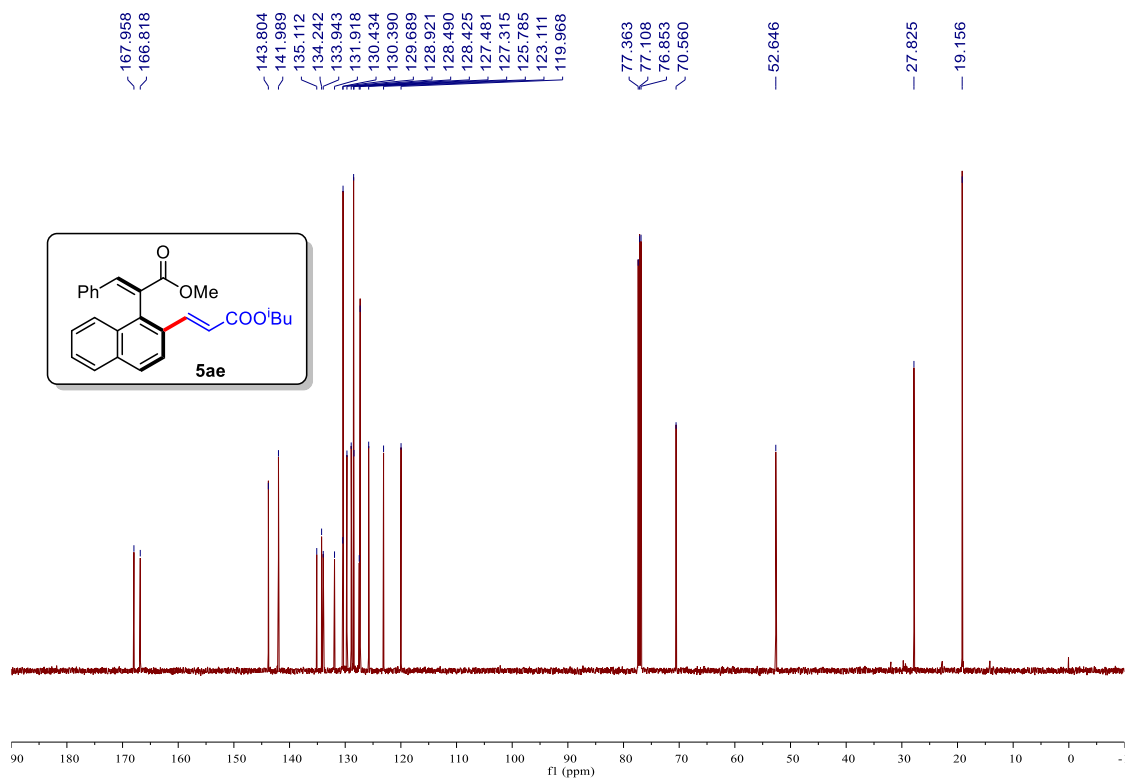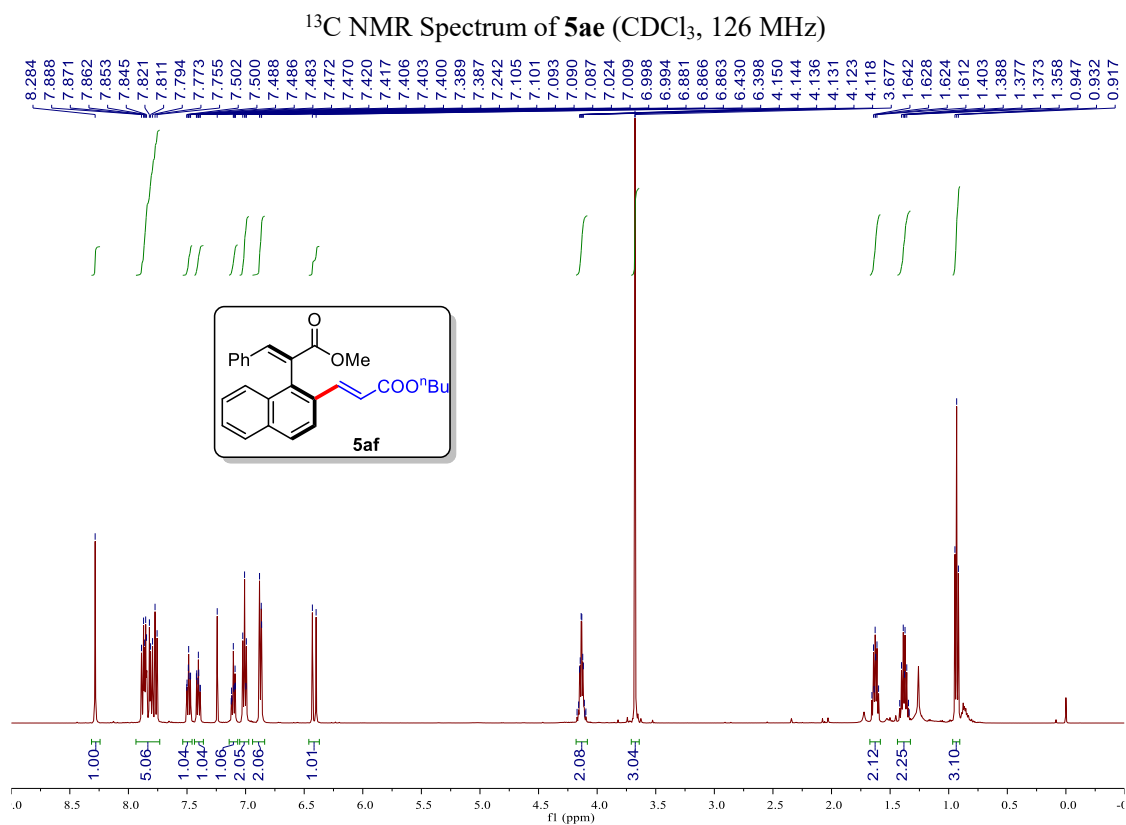

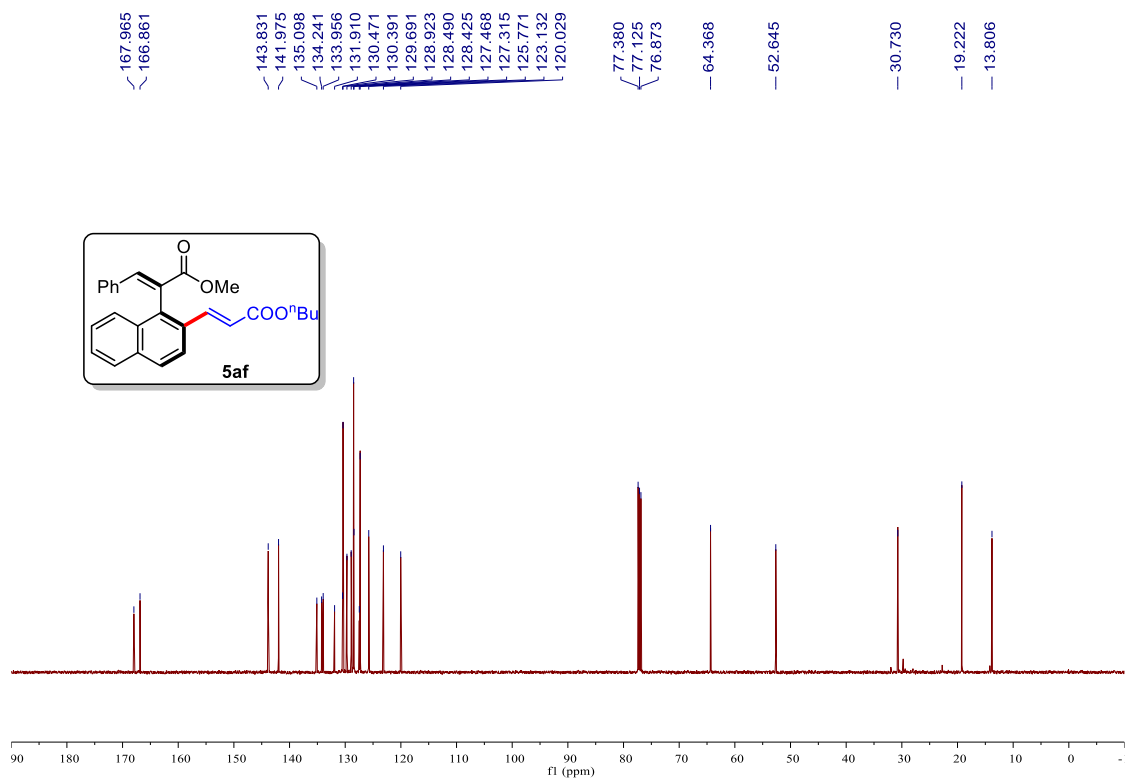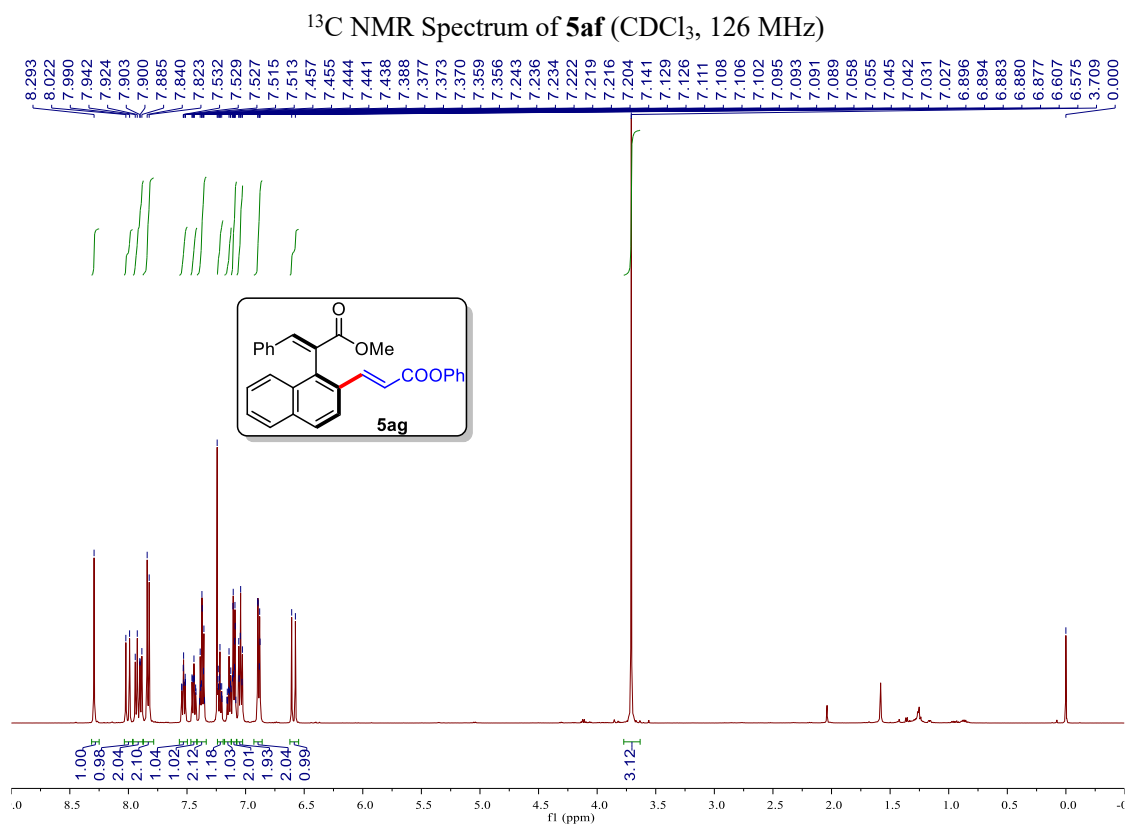

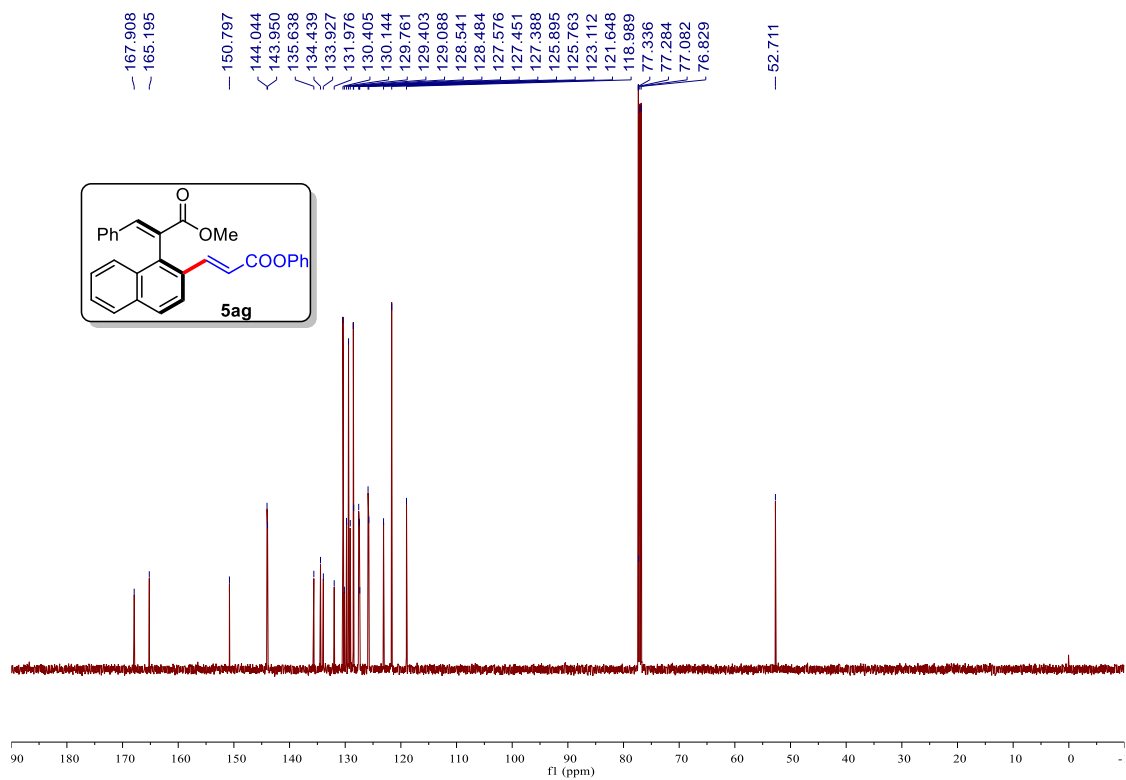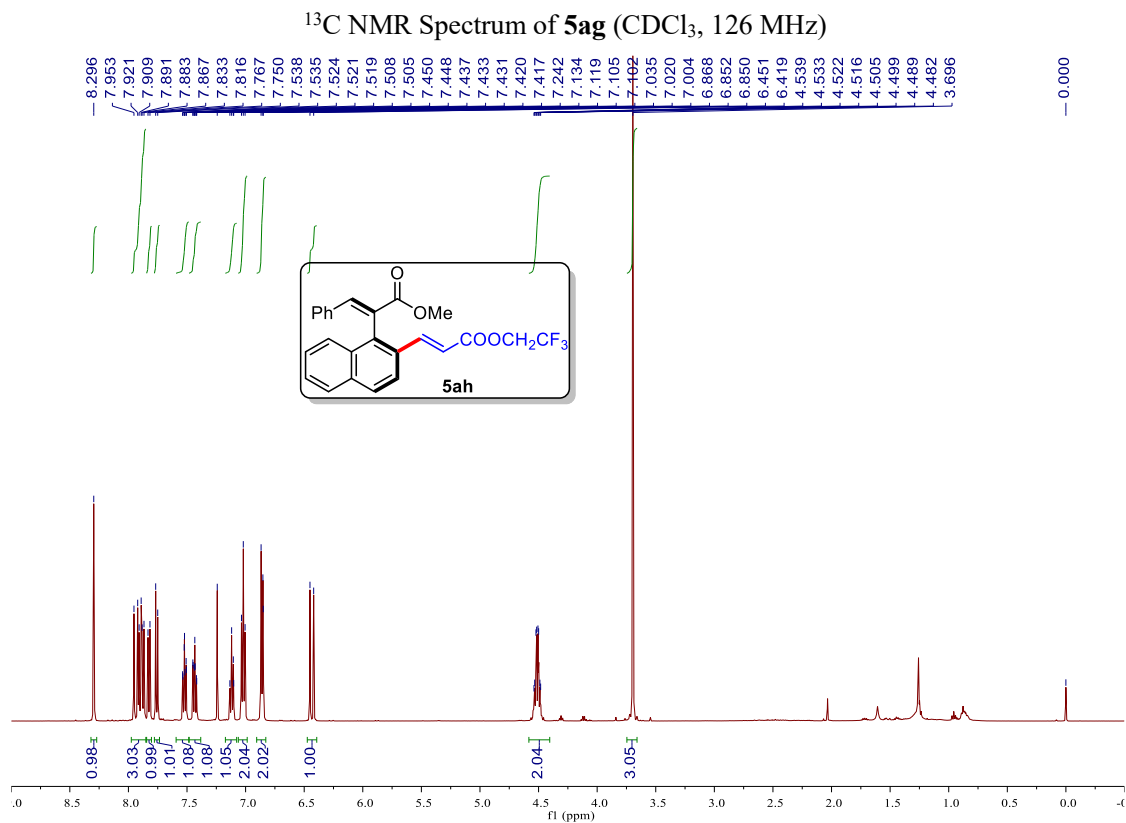

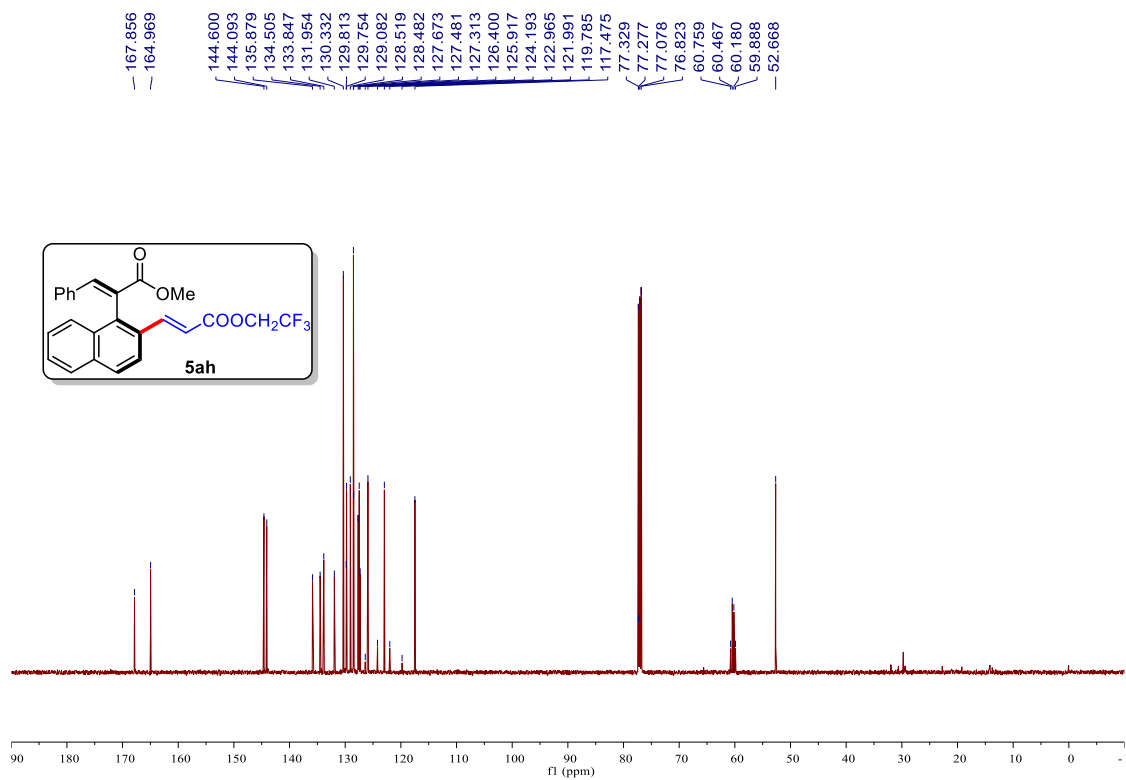

<sup>13</sup>C NMR Spectrum of **5ah** (CDCl<sub>3</sub>, 126 MHz)

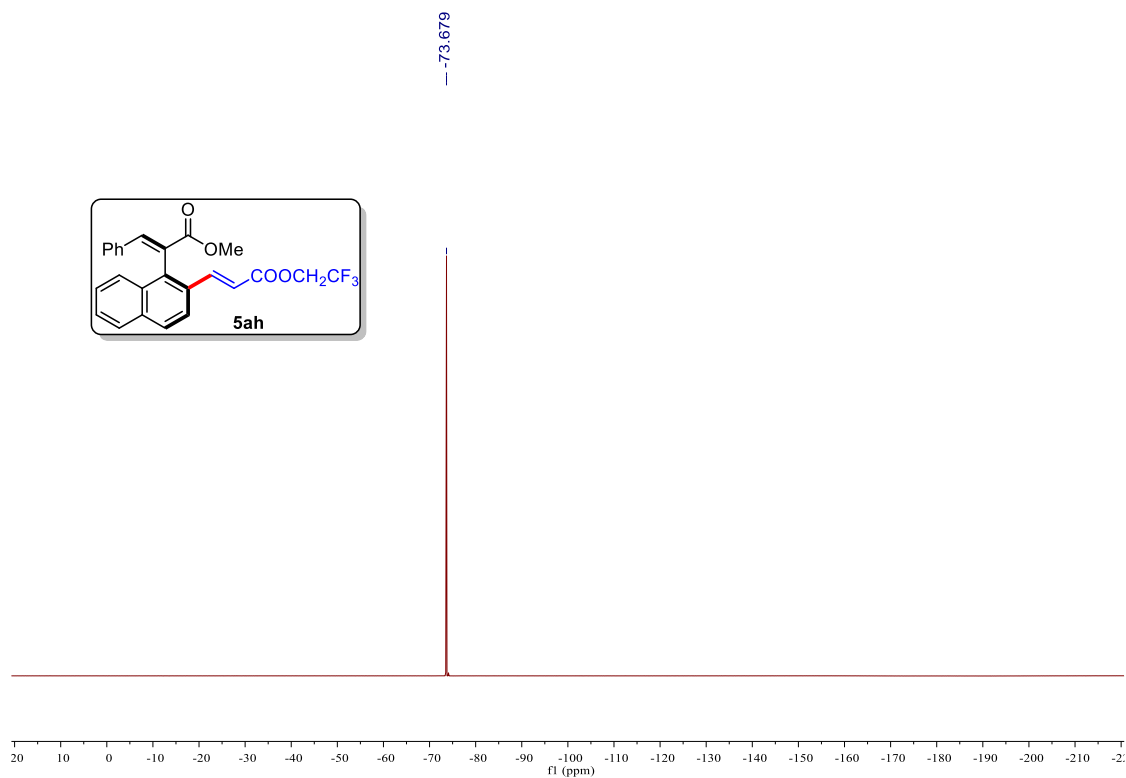

<sup>19</sup>F NMR Spectrum of **5ah** (CDCl<sub>3</sub>, 126 MHz)

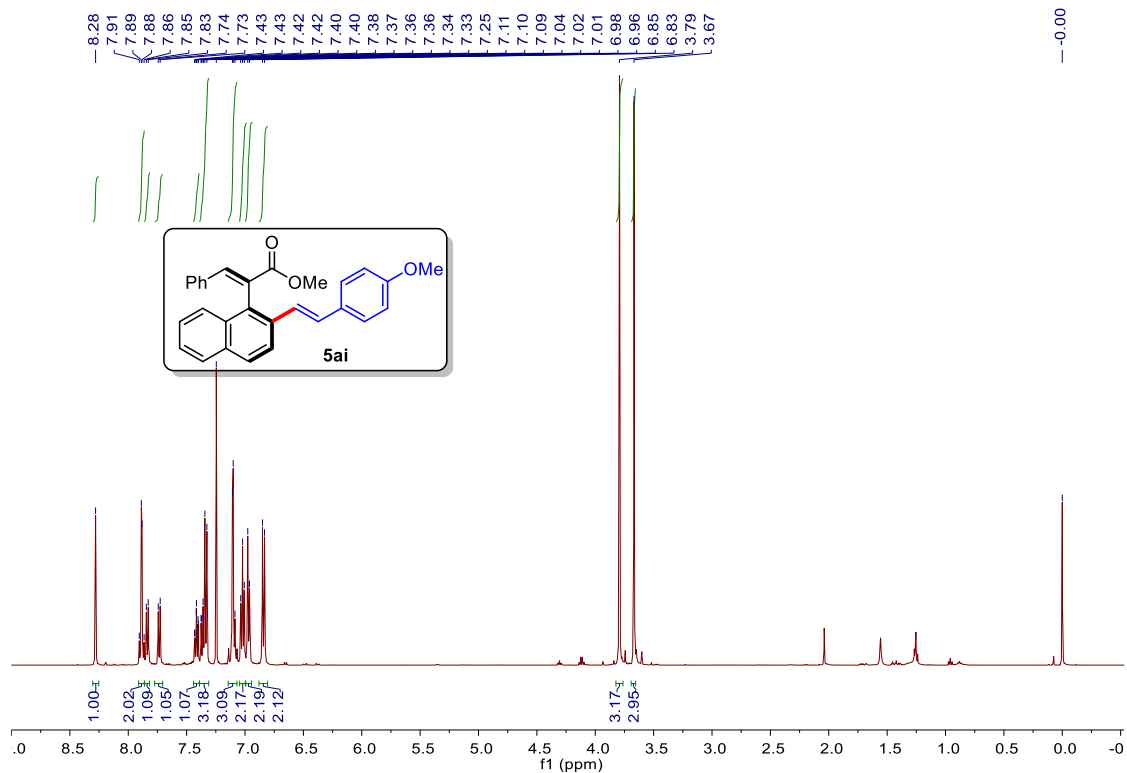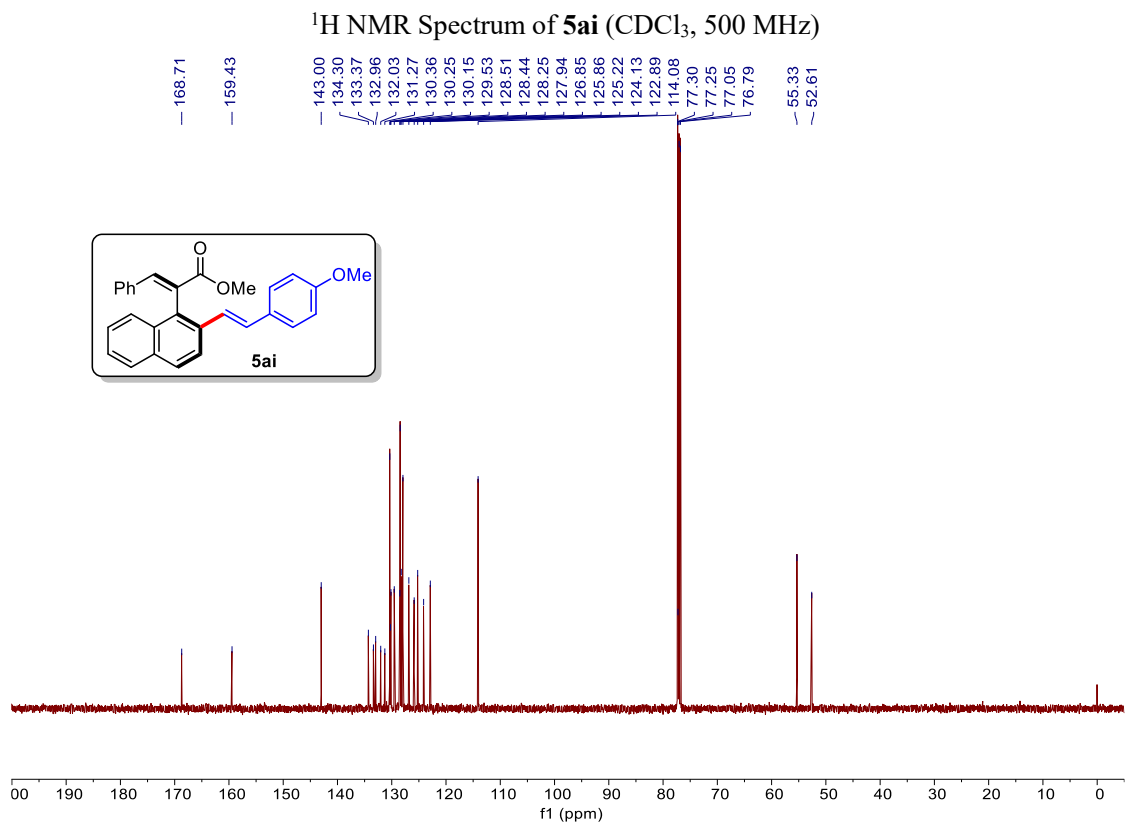

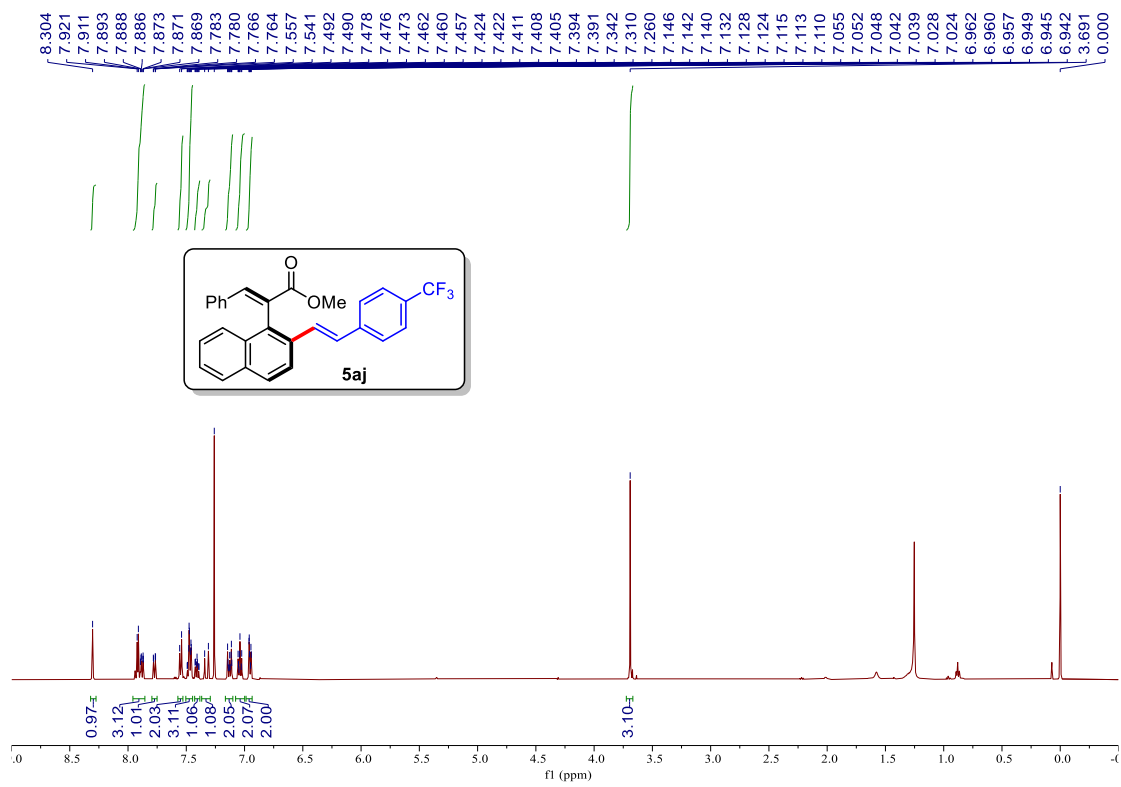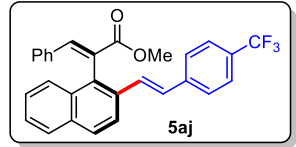

<sup>1</sup>H NMR Spectrum of **5aj** (CDCl<sub>3</sub>, 500 MHz)

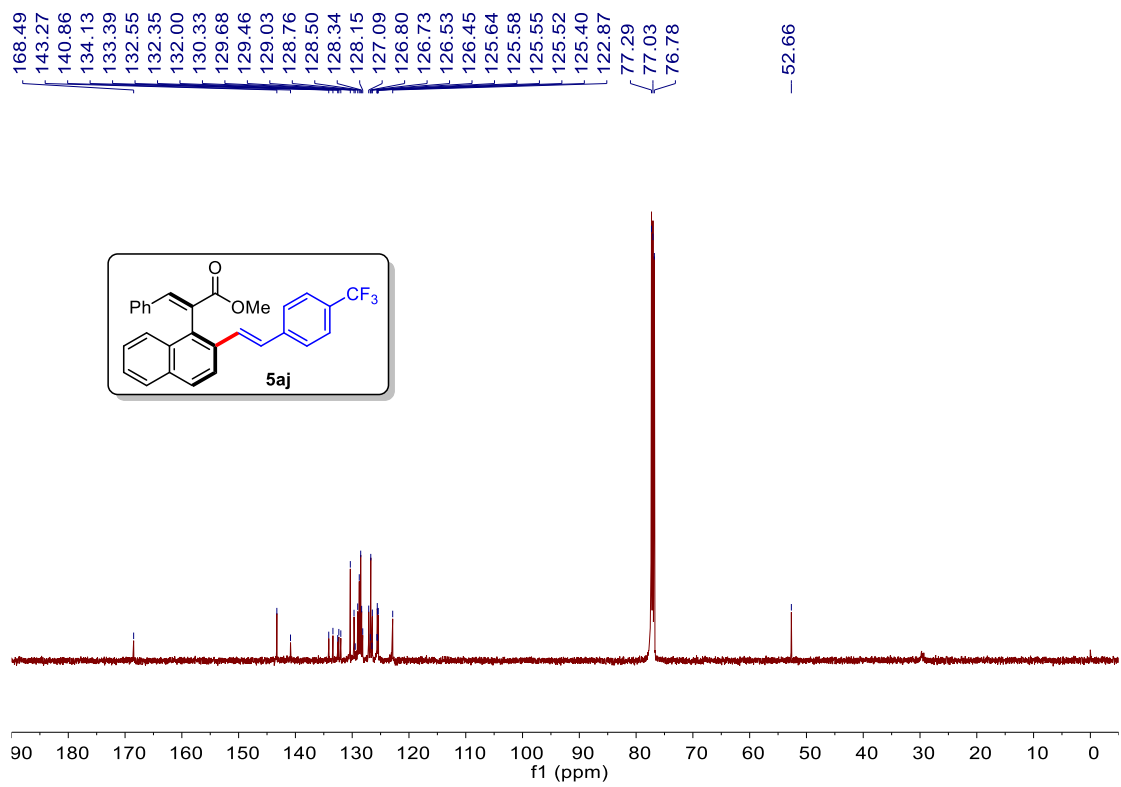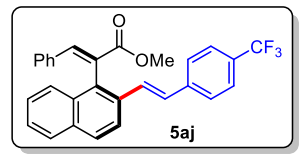

<sup>13</sup>C NMR Spectrum of **5aj** (CDCl<sub>3</sub>, 126 MHz)



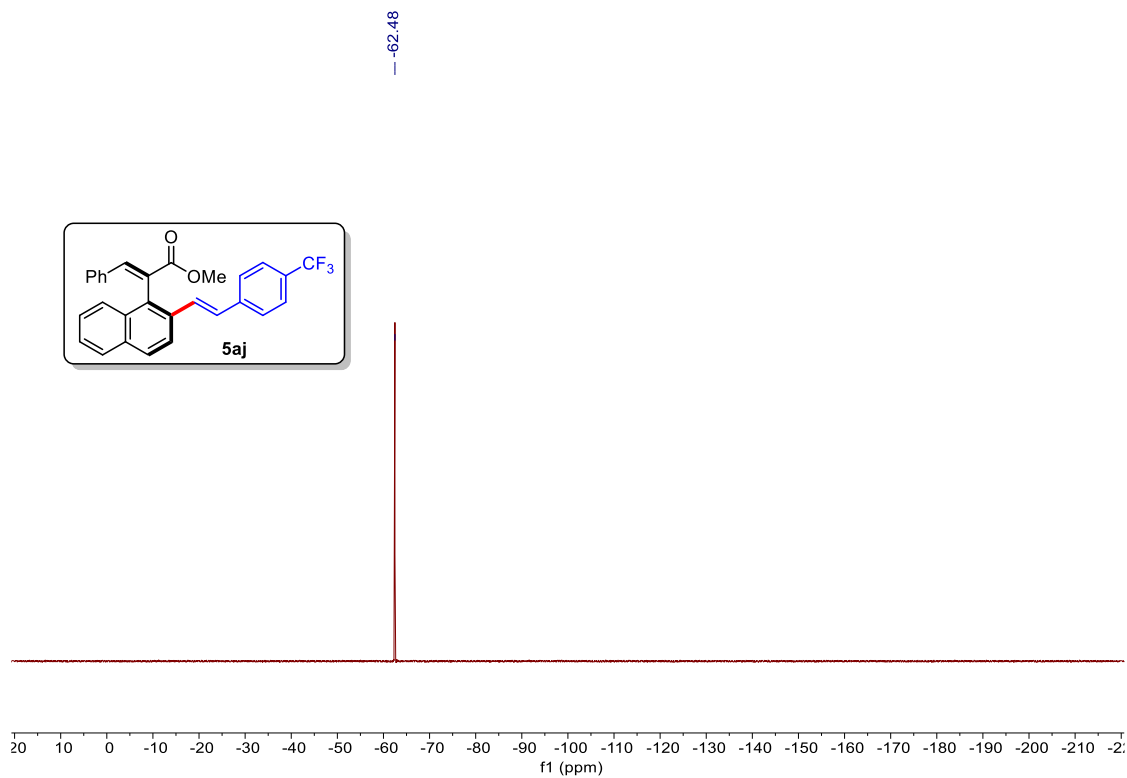

<sup>19</sup>F NMR Spectrum of **5aj** (CDCl<sub>3</sub>, 471 MHz)

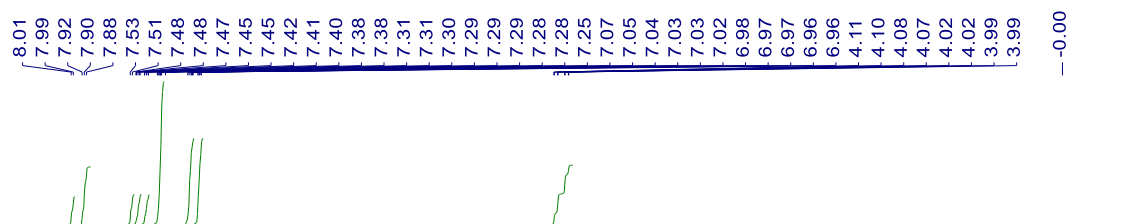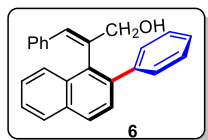

<sup>1</sup>H NMR Spectrum of **6** (CDCl<sub>3</sub>, 500 MHz)

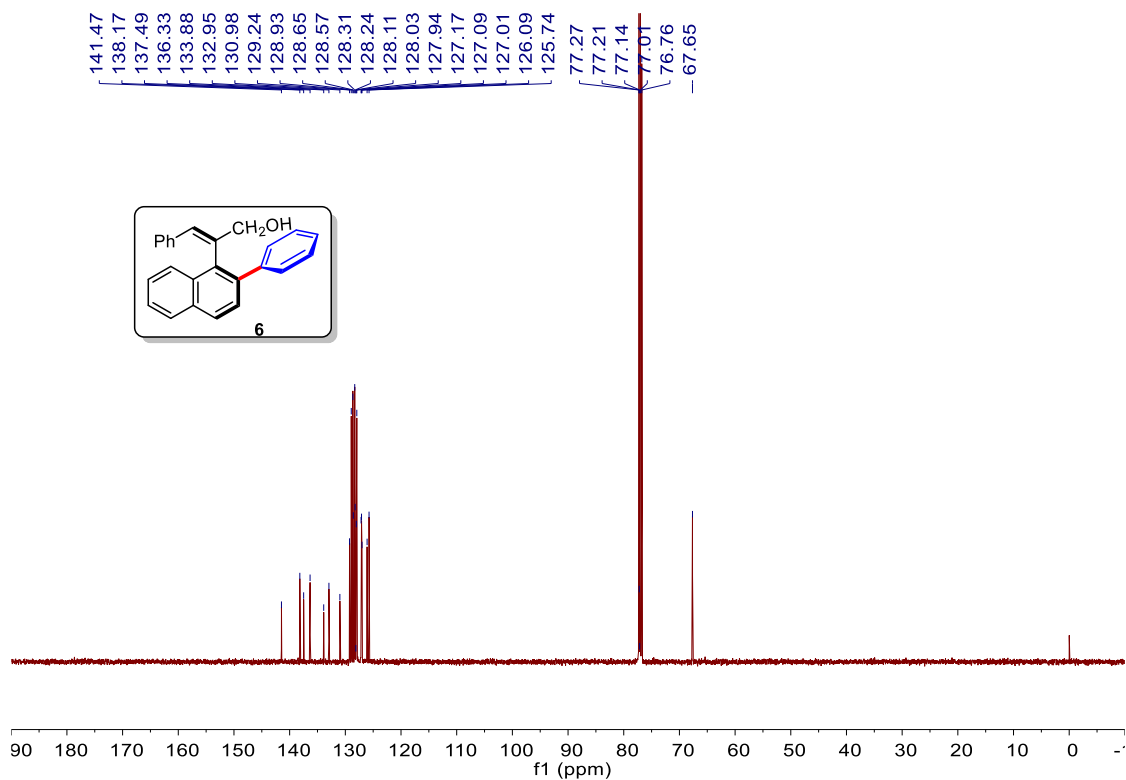

<sup>13</sup>C NMR Spectrum of 6 (CDCl<sub>3</sub>, 126 MHz)

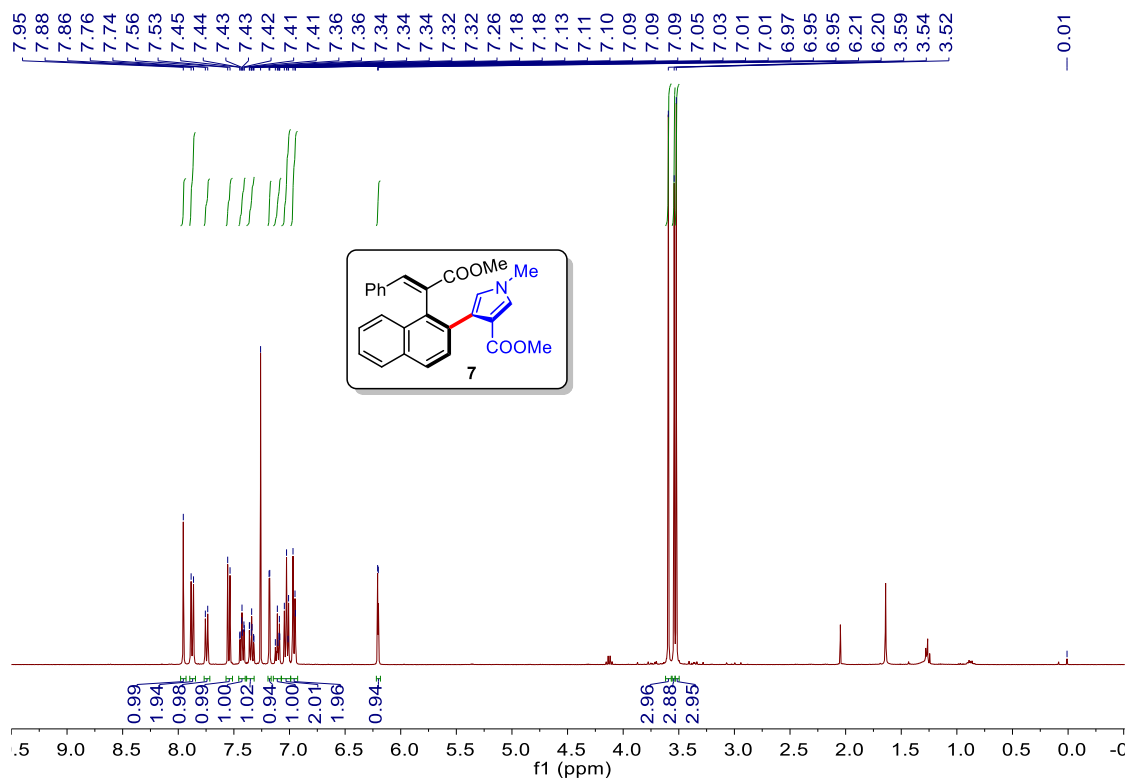

<sup>1</sup>H NMR Spectrum of 7 (CDCl<sub>3</sub>, 500 MHz)

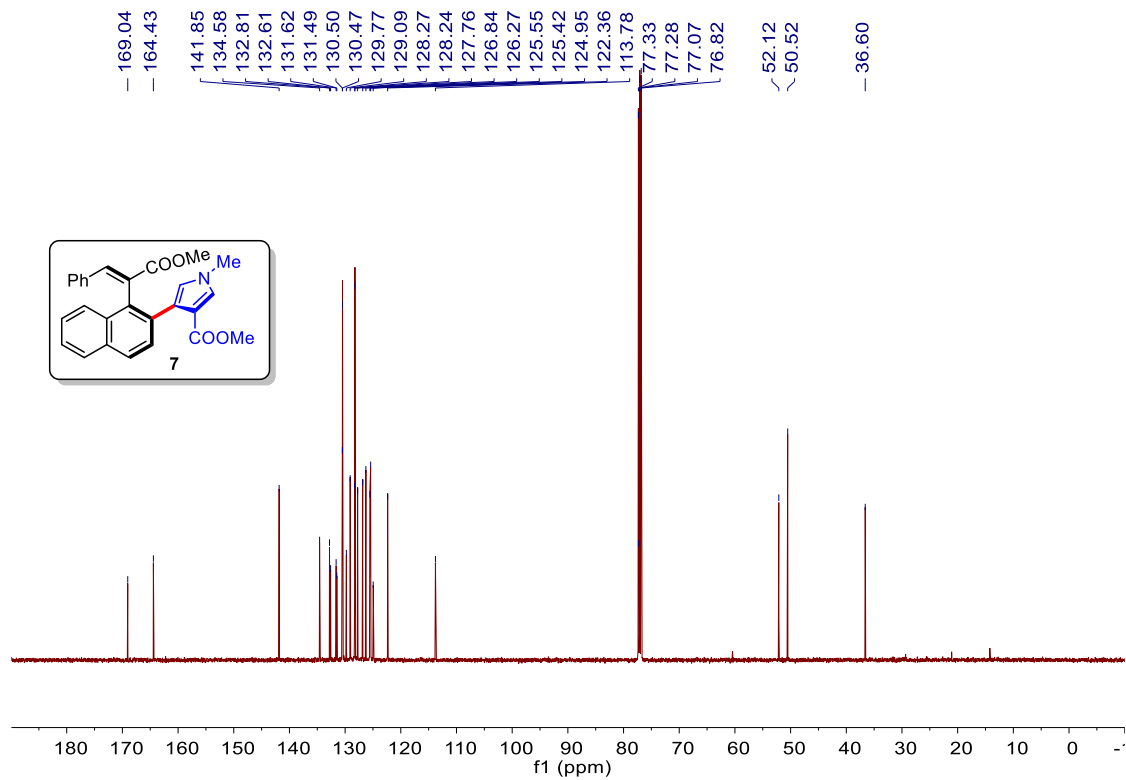

<sup>13</sup>C NMR Spectrum of **7** (CDCl<sub>3</sub>, 126 MHz)

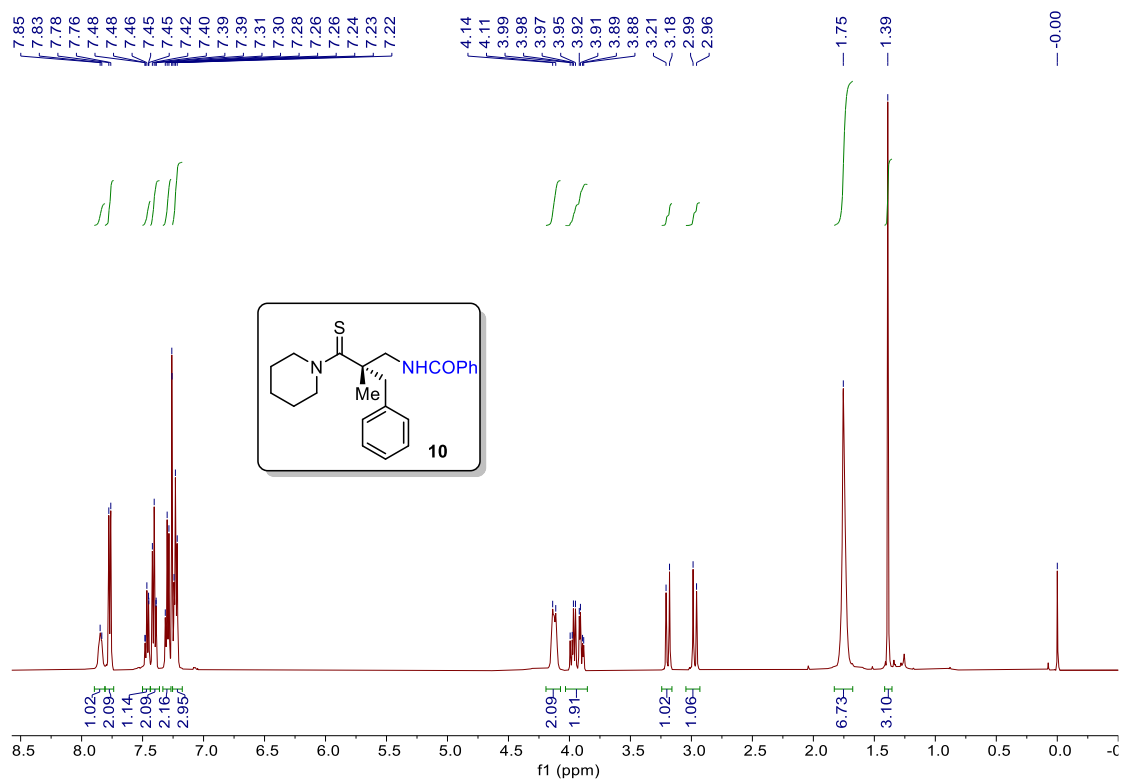

<sup>1</sup>H NMR Spectrum of **10** (CDCl<sub>3</sub>, 500 MHz)

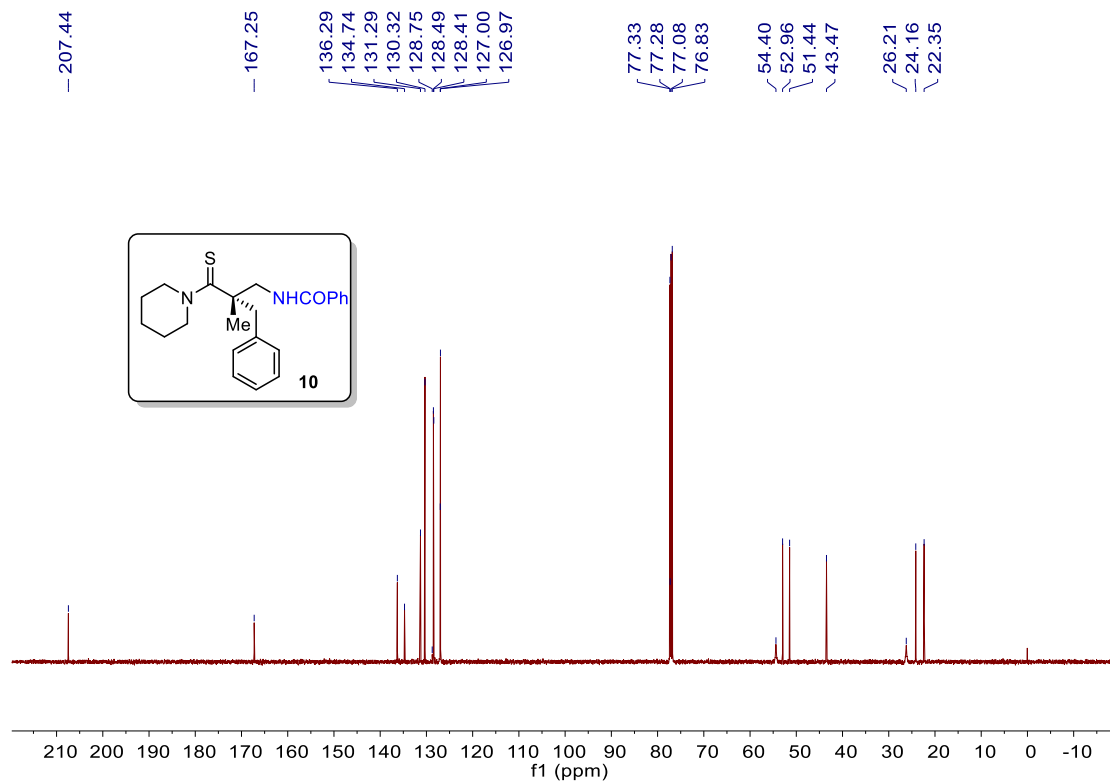

<sup>13</sup>C NMR Spectrum of **10** (CDCl<sub>3</sub>, 500 MHz)

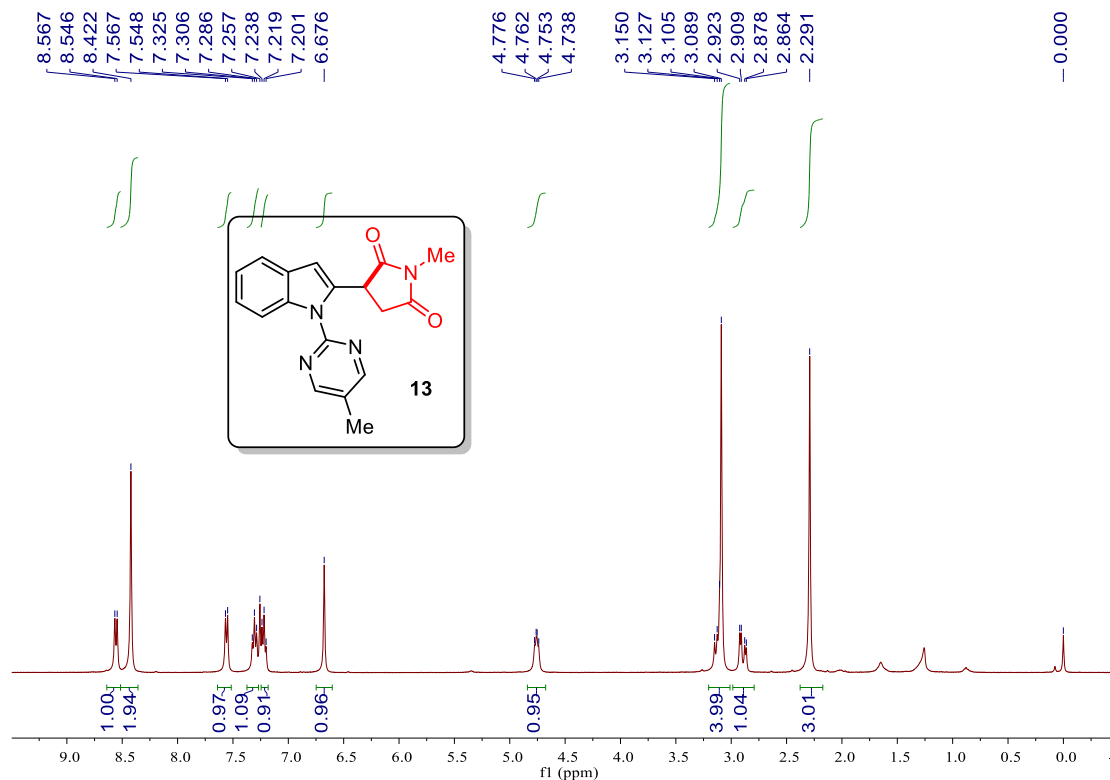

<sup>1</sup>H NMR Spectrum of **13** (CDCl<sub>3</sub>, 400 MHz)

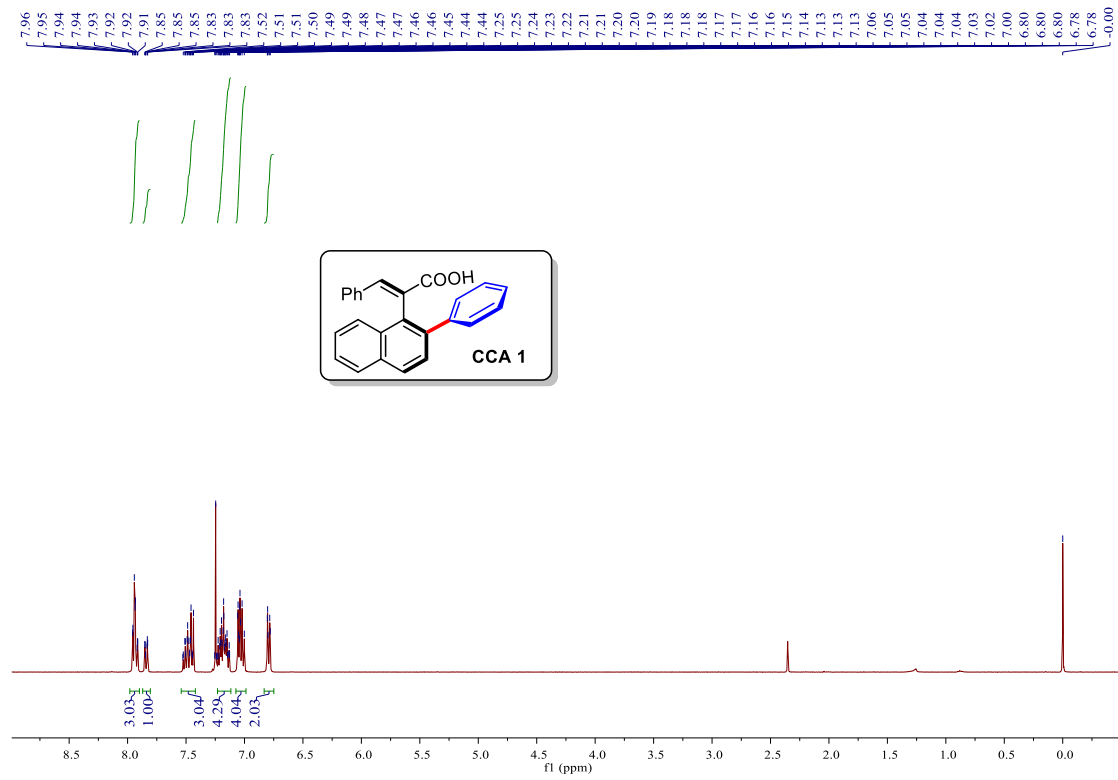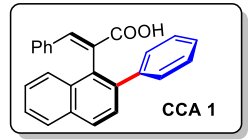

**<sup>1</sup>H NMR Spectrum of CCA 1 (CDCl<sub>3</sub>, 400 MHz)**

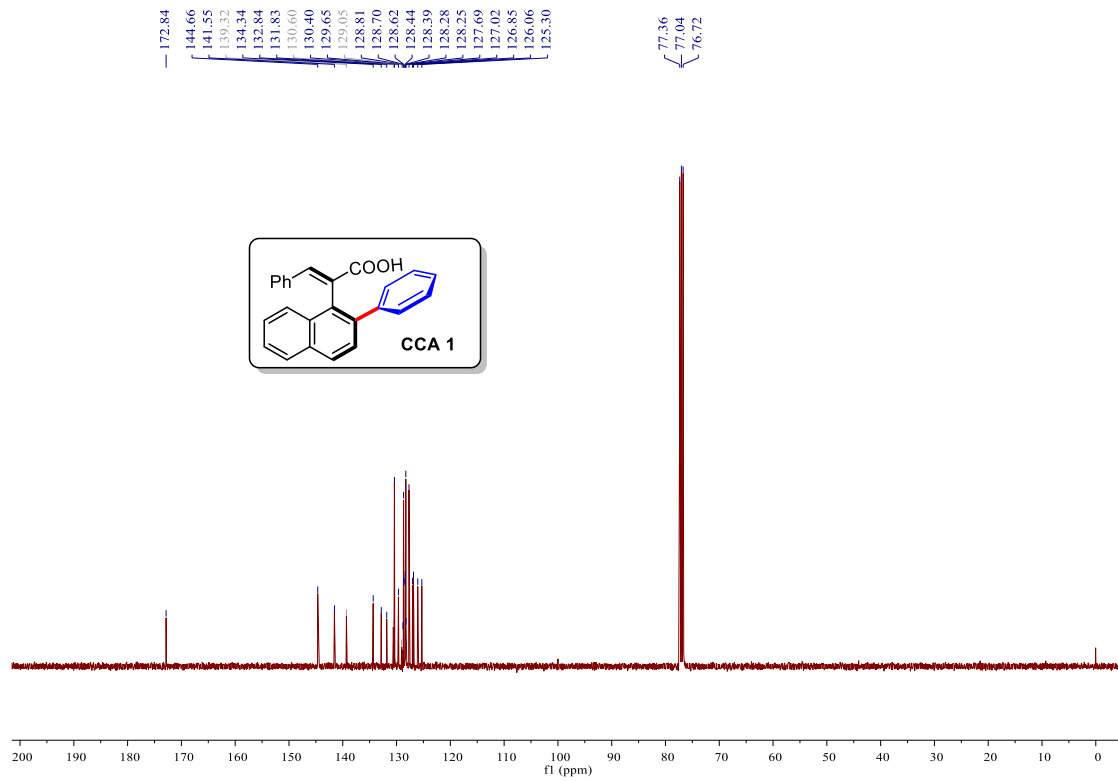

**<sup>13</sup>C NMR Spectrum of CCA 1 (CDCl<sub>3</sub>, 101 MHz)**

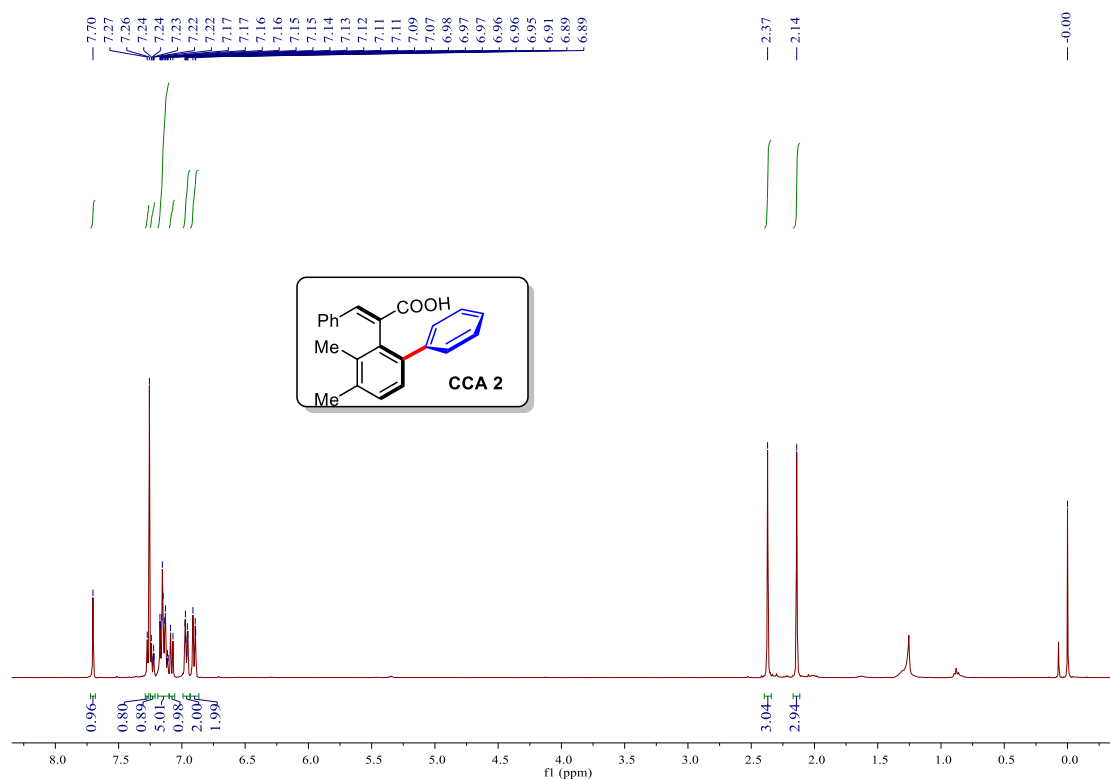

**<sup>1</sup>H NMR Spectrum of CCA 2 (CDCl<sub>3</sub>, 400 MHz)**

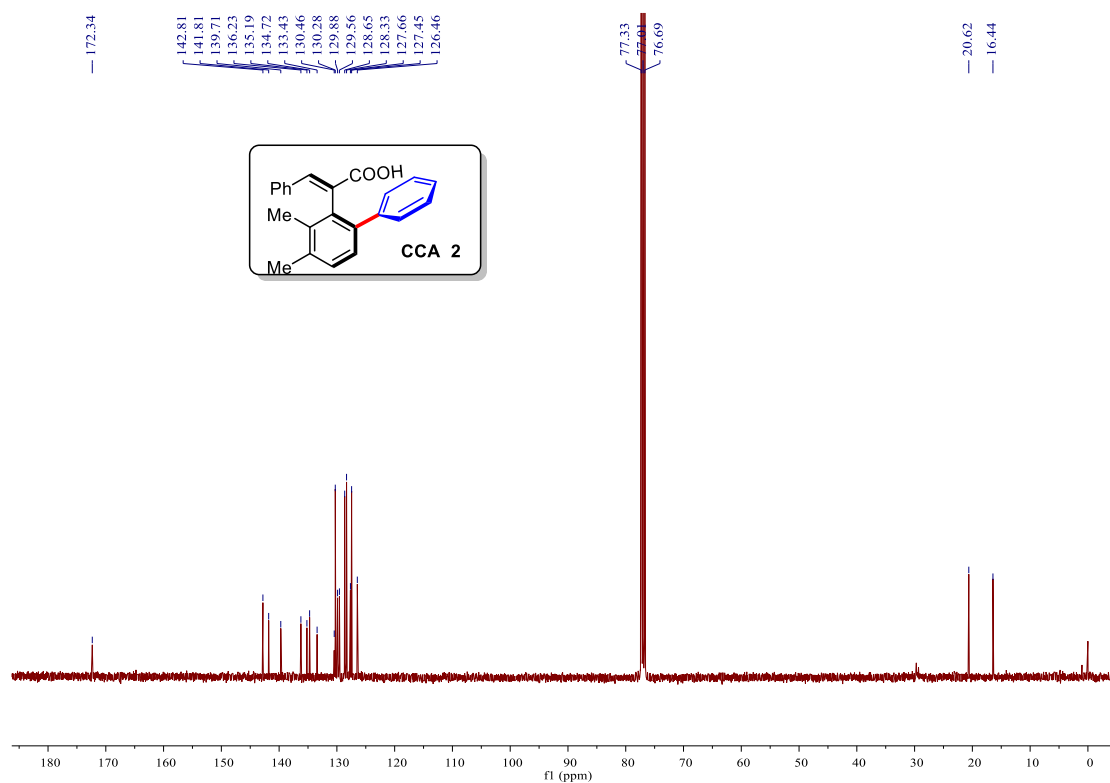

**<sup>13</sup>C NMR Spectrum of CCA 2 (CDCl<sub>3</sub>, 101 MHz)**

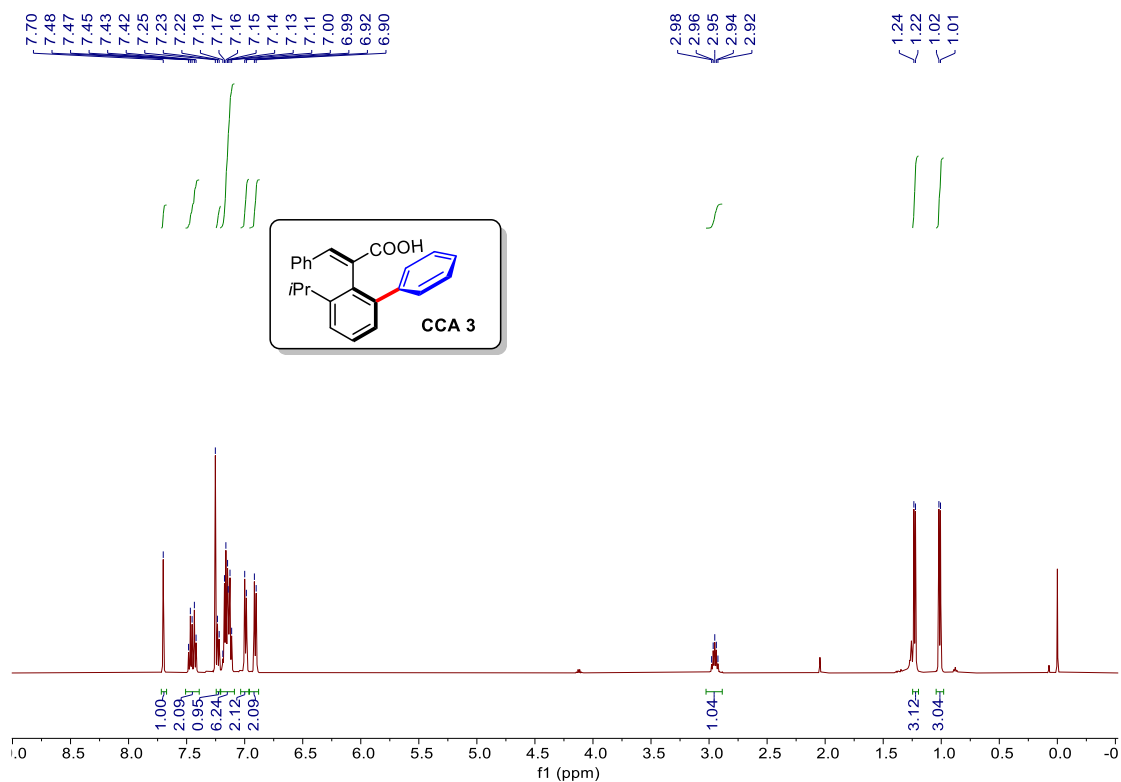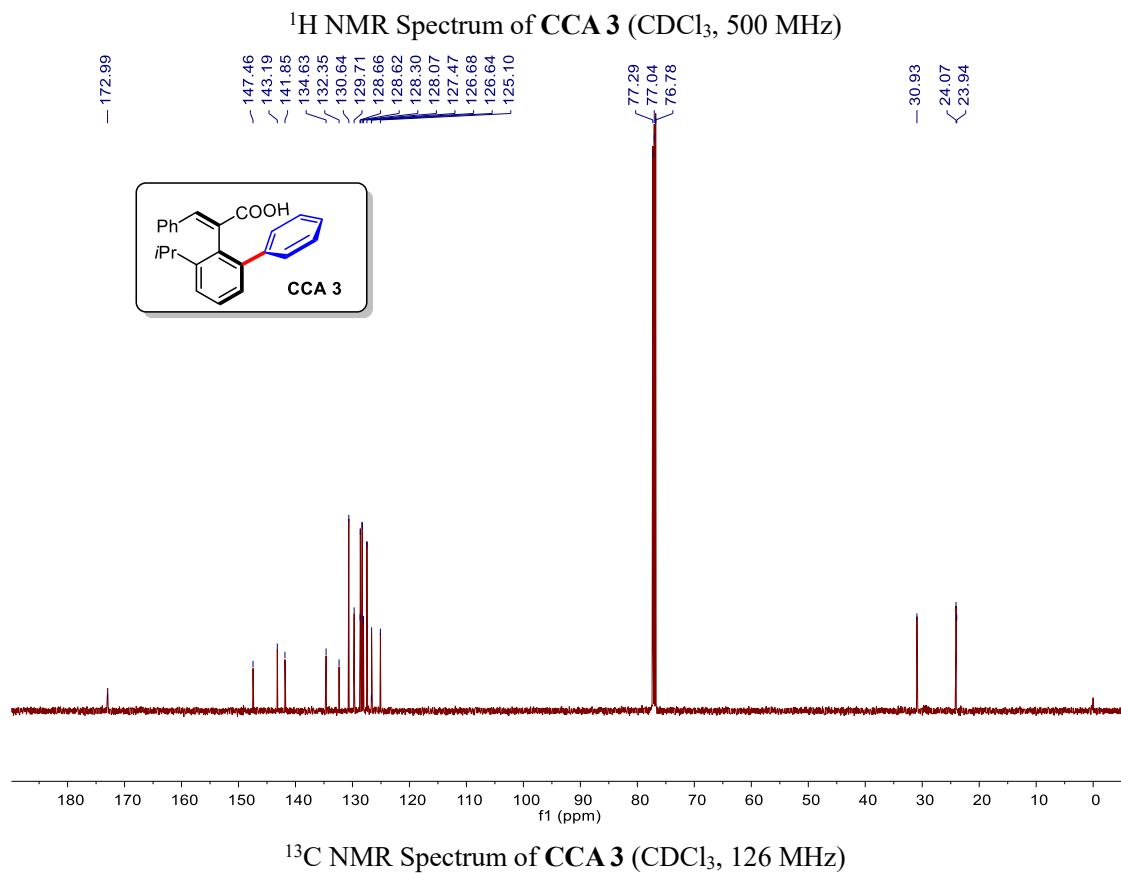

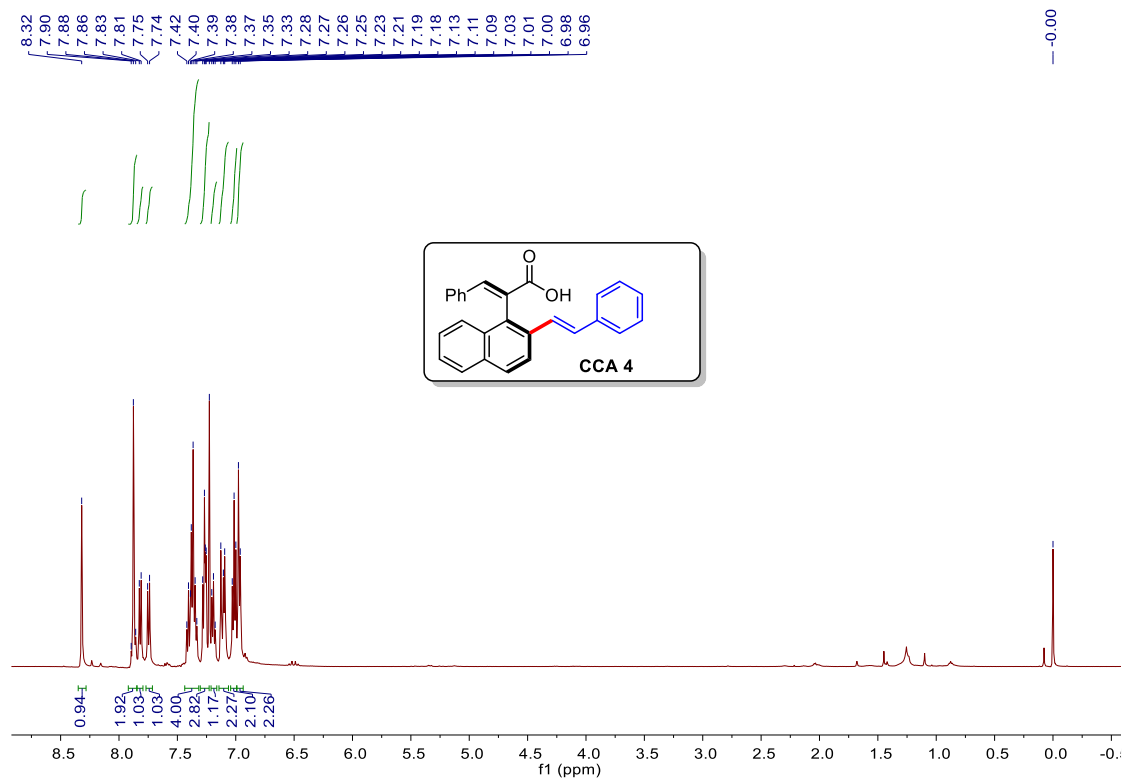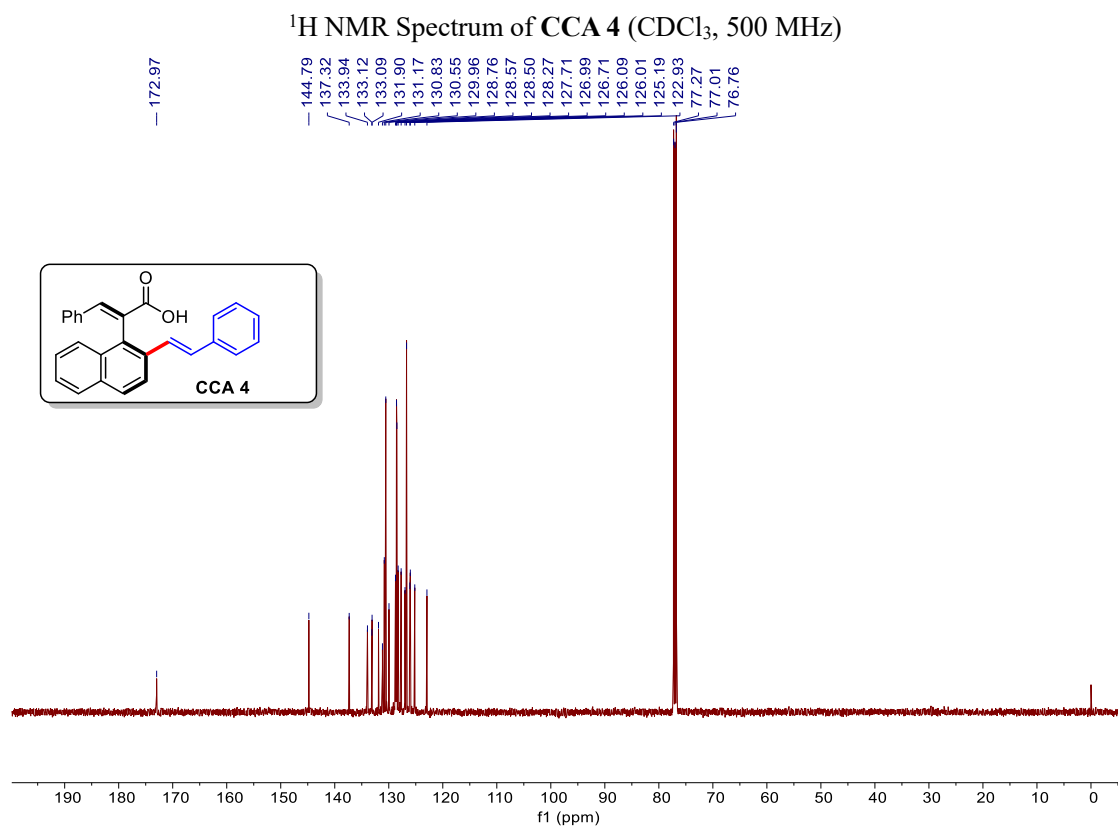



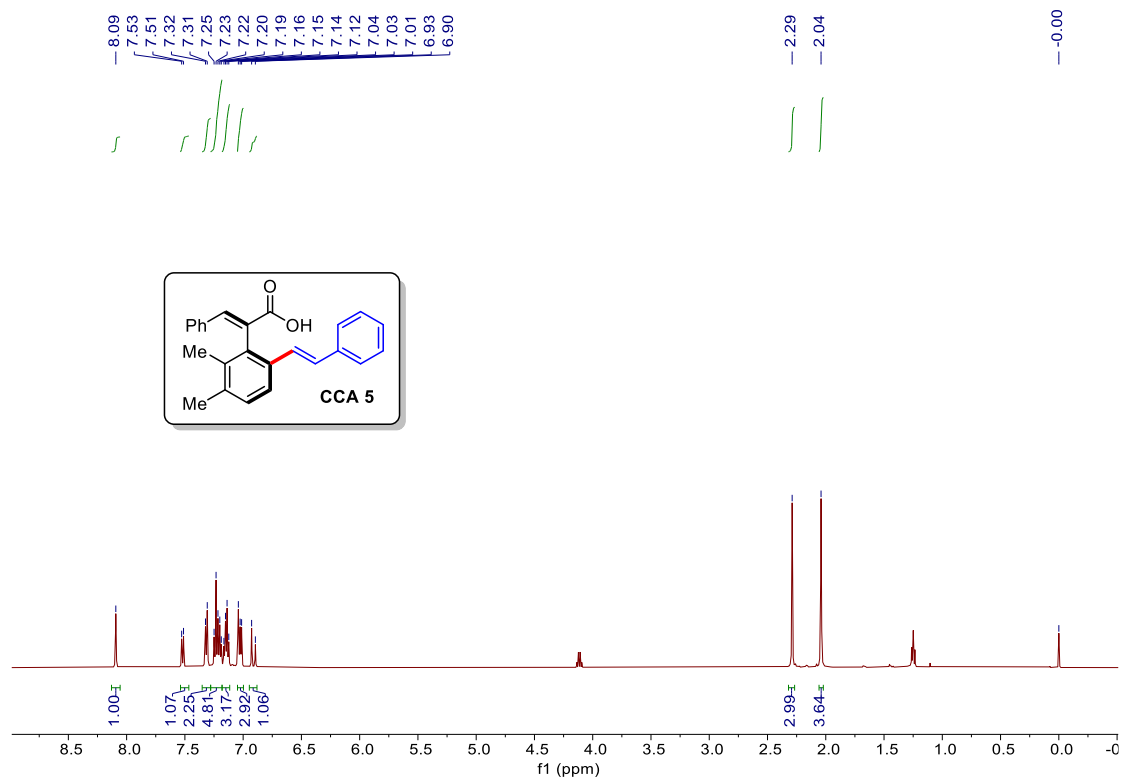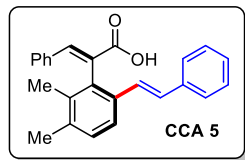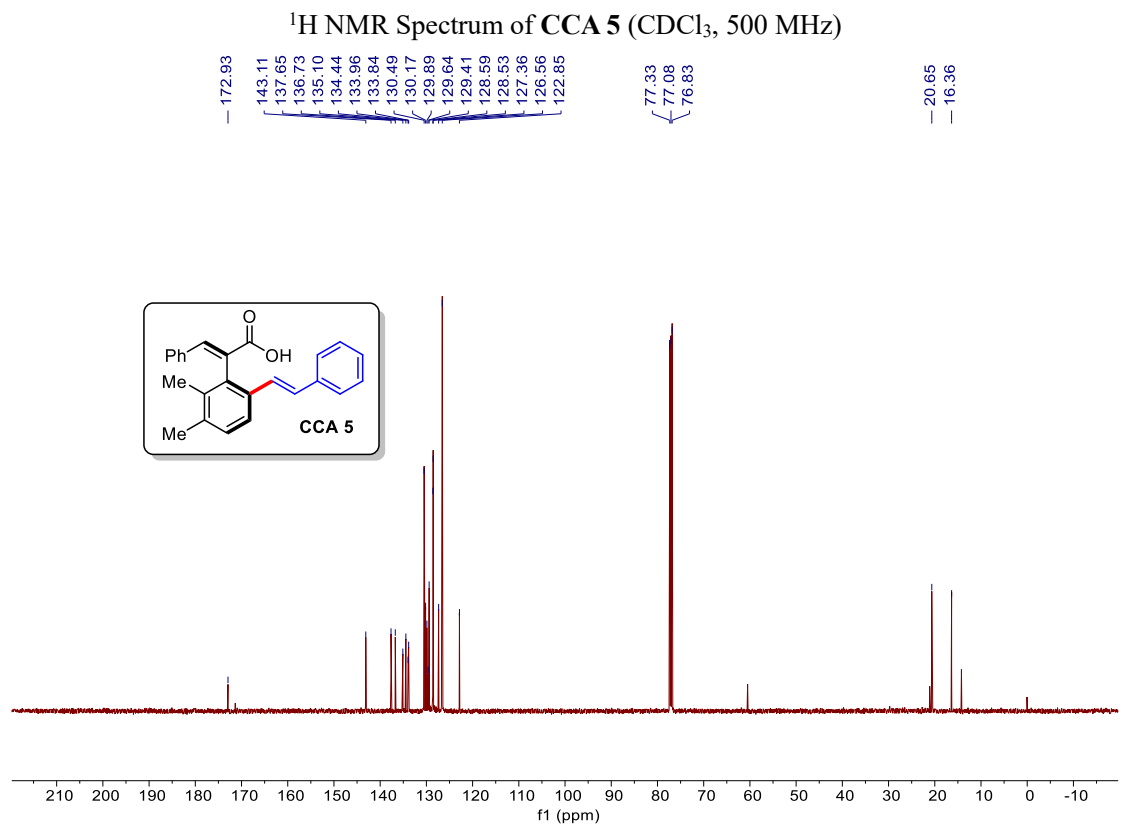

**<sup>13</sup>C NMR Spectrum of CCA 5 (CDCl<sub>3</sub>, 500 MHz)**

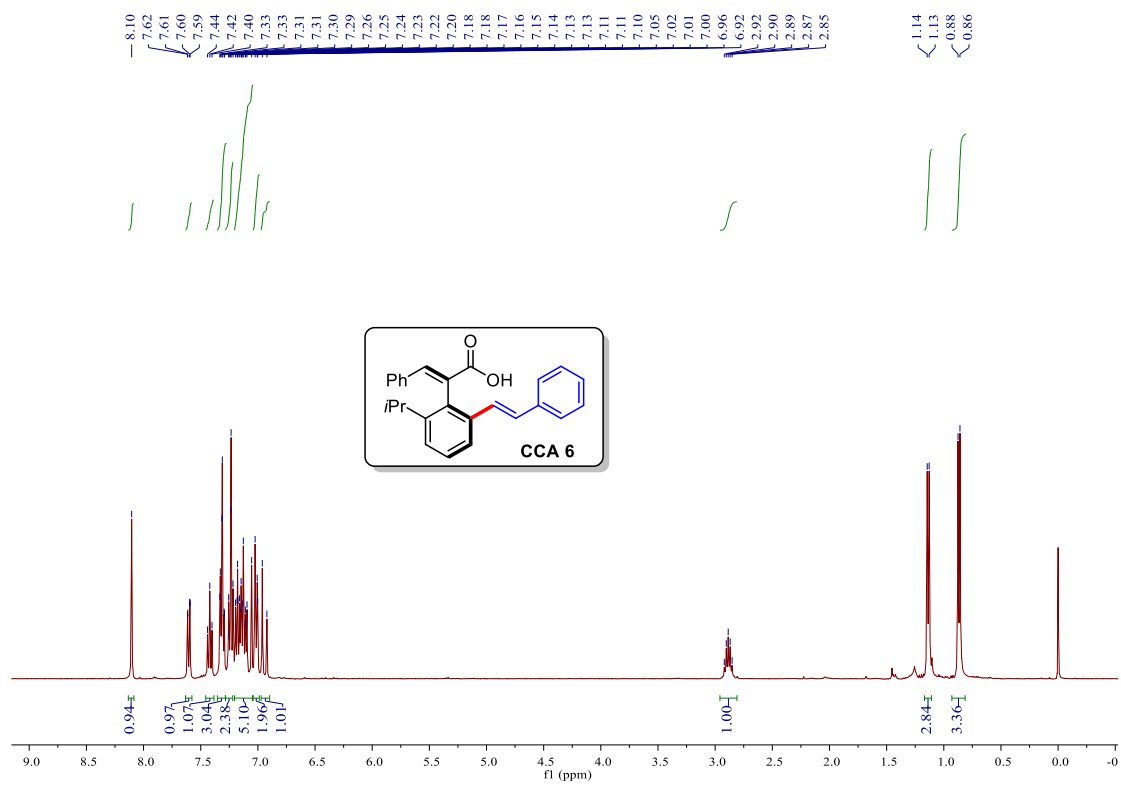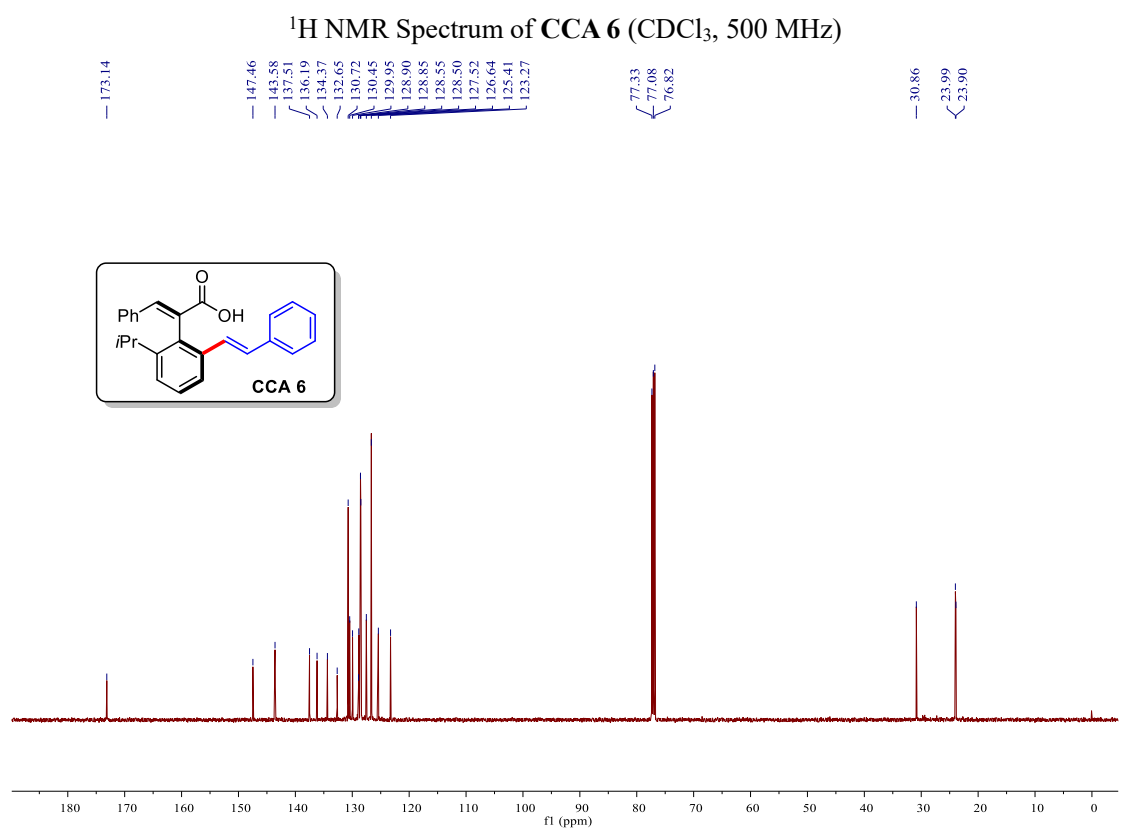

## 5. HPLC Data

### General Information:

The Chinese character “色谱图” means “Chromatogram”, “峰表” means “Peak Table”, “峰号” means “Peak Number”, “保留时间” means “Retention Time”, “面积” means “Peak Area”, “高度” means “Peak Height”, and “面积%” means “Peak Area%”.

<色谱图>

mAU

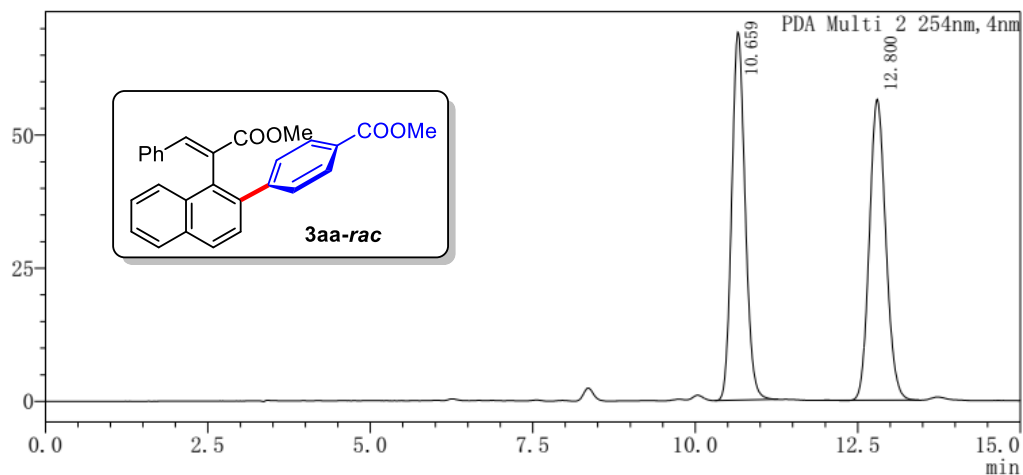

<峰表>

PDA Ch2 254nm

| 峰号 | 保留时间   | 面积      | 高度     | 面积%     |
|----|--------|---------|--------|---------|
| 1  | 10.659 | 991669  | 69067  | 49.945  |
| 2  | 12.800 | 993854  | 56506  | 50.055  |
| 总计 |        | 1985523 | 125572 | 100.000 |

<色谱图>

mAU

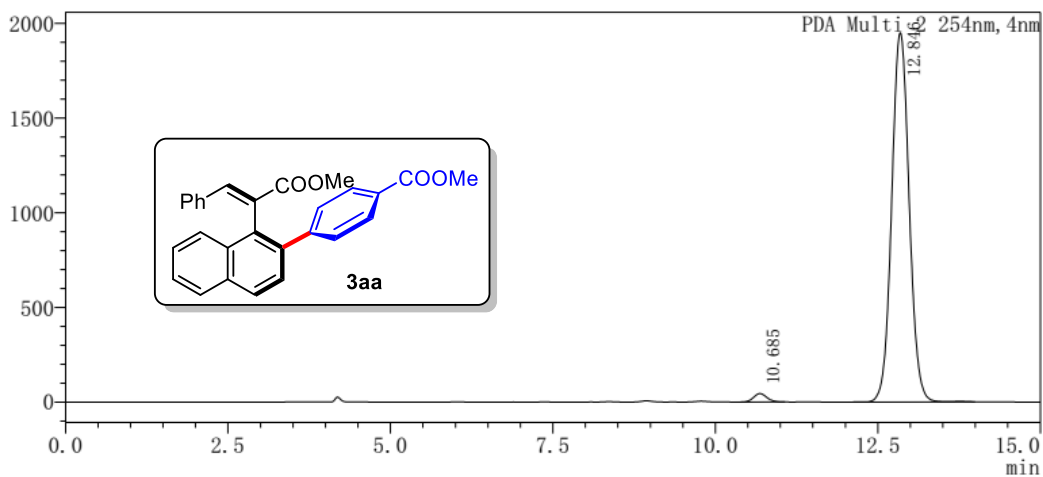

<峰表>

PDA Ch2 254nm

| 峰号 | 保留时间   | 面积       | 高度      | 面积%     |
|----|--------|----------|---------|---------|
| 1  | 10.685 | 632626   | 44475   | 1.703   |
| 2  | 12.846 | 36513944 | 1948807 | 98.297  |
| 总计 |        | 37146570 | 1993282 | 100.000 |

<色谱图>

mAU

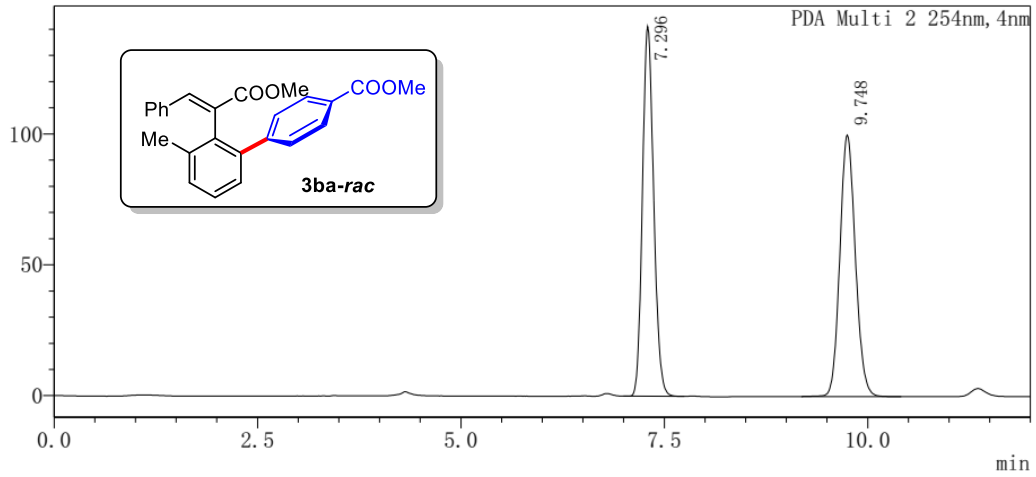

<峰表>

PDA Ch2 254nm

| 峰号 | 保留时间  | 面积      | 高度     | 面积%     |
|----|-------|---------|--------|---------|
| 1  | 7.296 | 1359147 | 141217 | 50.619  |
| 2  | 9.748 | 1325905 | 99948  | 49.381  |
| 总计 |       | 2685051 | 241164 | 100.000 |

<色谱图>

mAU

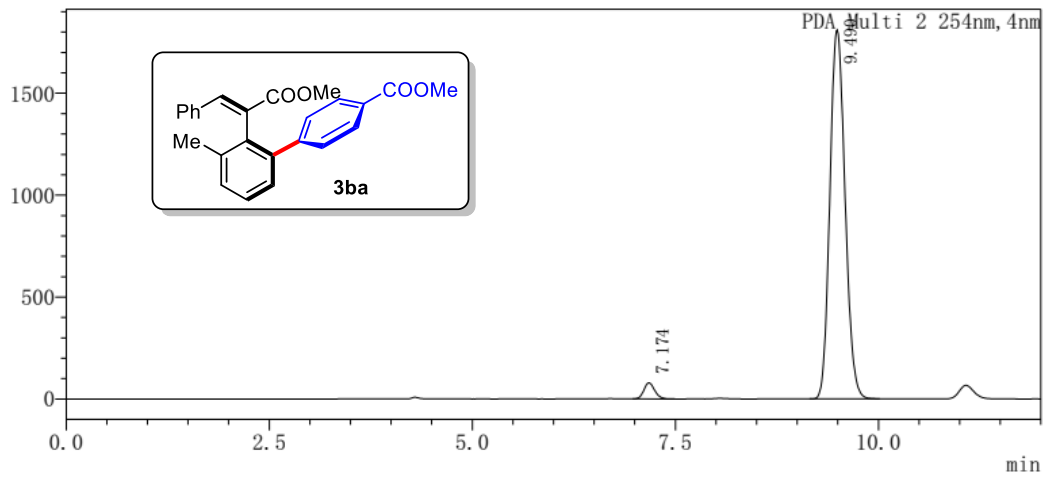

<峰表>

PDA Ch2 254nm

| 峰号 | 保留时间  | 面积       | 高度      | 面积%     |
|----|-------|----------|---------|---------|
| 1  | 7.174 | 725083   | 78244   | 2.987   |
| 2  | 9.490 | 23549464 | 1810199 | 97.013  |
| 总计 |       | 24274548 | 1888444 | 100.000 |

<色谱图>

mAU

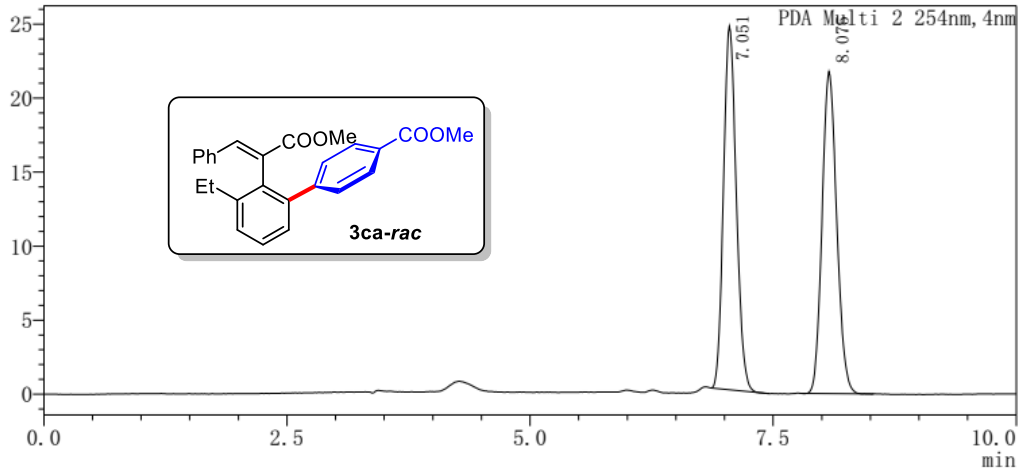

<峰表>

PDA Ch2 254nm

| 峰号 | 保留时间  | 面积     | 高度    | 面积%     |
|----|-------|--------|-------|---------|
| 1  | 7.051 | 224929 | 24548 | 49.630  |
| 2  | 8.075 | 228281 | 21747 | 50.370  |
| 总计 |       | 453210 | 46296 | 100.000 |

<色谱图>

mAU

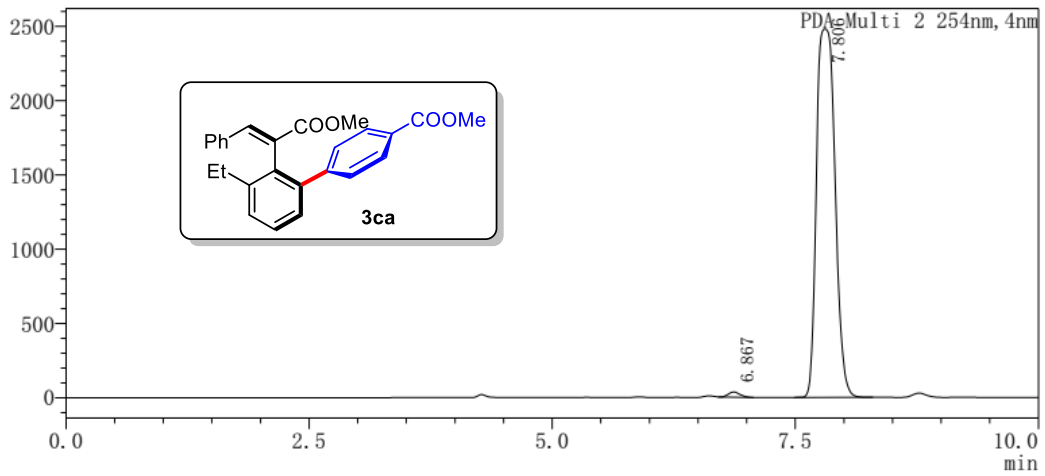

<峰表>

PDA Ch2 254nm

| 峰号 | 保留时间  | 面积       | 高度      | 面积%     |
|----|-------|----------|---------|---------|
| 1  | 6.867 | 294522   | 35334   | 0.888   |
| 2  | 7.806 | 32872962 | 2478762 | 99.112  |
| 总计 |       | 33167484 | 2514097 | 100.000 |

<色谱图>

mAU

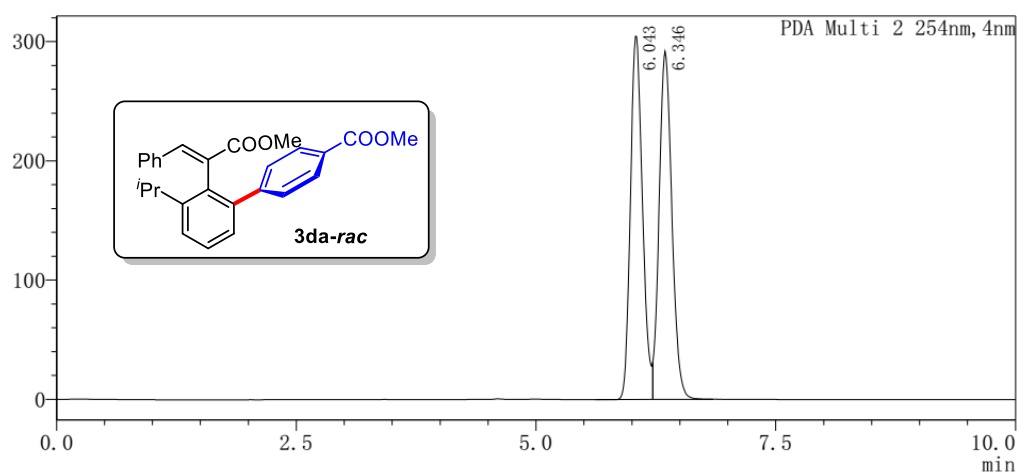

<峰表>

PDA Ch2 254nm

| 峰号 | 保留时间  | 面积      | 高度     | 面积%     |
|----|-------|---------|--------|---------|
| 1  | 6.043 | 2679022 | 304684 | 49.940  |
| 2  | 6.346 | 2685510 | 291936 | 50.060  |
| 总计 |       | 5364532 | 596620 | 100.000 |

<色谱图>

mAU

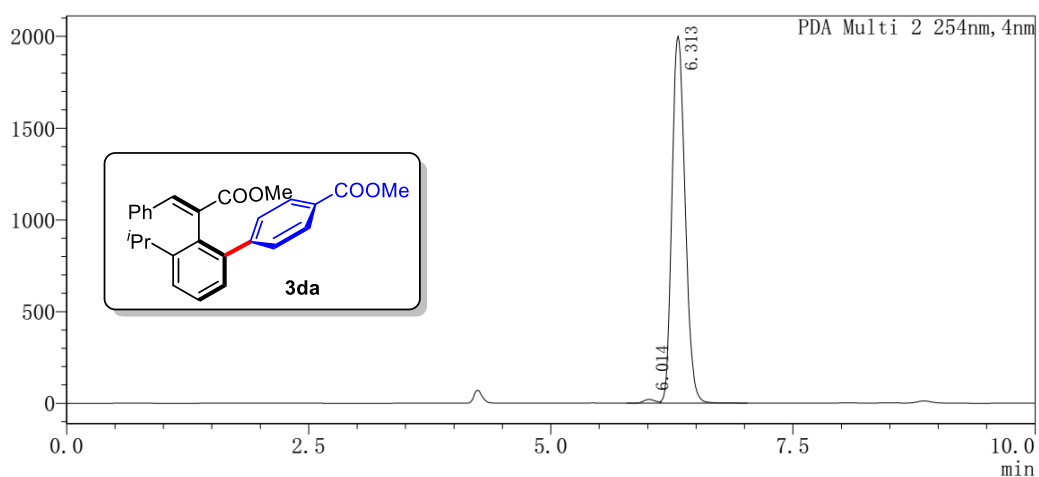

<峰表>

PDA Ch2 254nm

| 峰号 | 保留时间  | 面积       | 高度      | 面积%     |
|----|-------|----------|---------|---------|
| 1  | 6.014 | 181481   | 20447   | 0.947   |
| 2  | 6.313 | 18986846 | 1999405 | 99.053  |
| 总计 |       | 19168327 | 2019852 | 100.000 |

<色谱图>

mAU

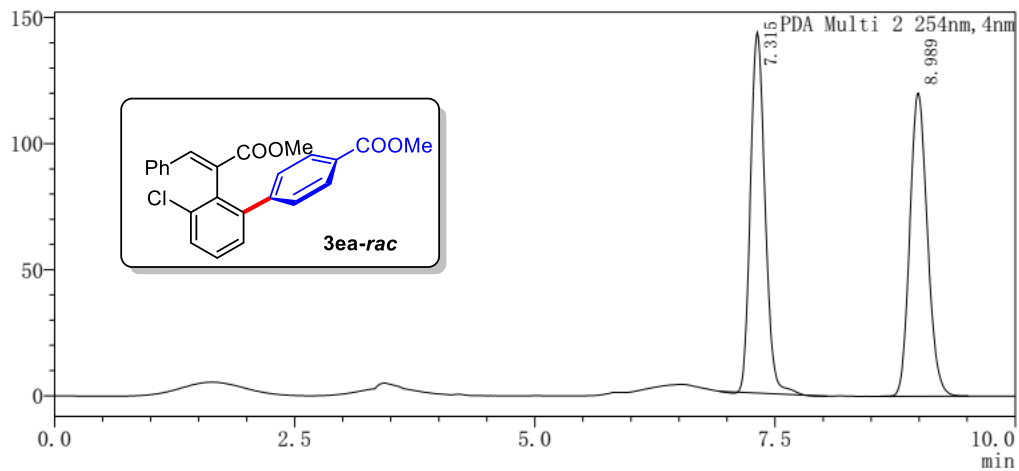

<峰表>

PDA Ch2 254nm

| 峰号 | 保留时间  | 面积      | 高度     | 面积%     |
|----|-------|---------|--------|---------|
| 1  | 7.315 | 1514176 | 143021 | 49.701  |
| 2  | 8.989 | 1532404 | 120188 | 50.299  |
| 总计 |       | 3046580 | 263210 | 100.000 |

<色谱图>

mAU

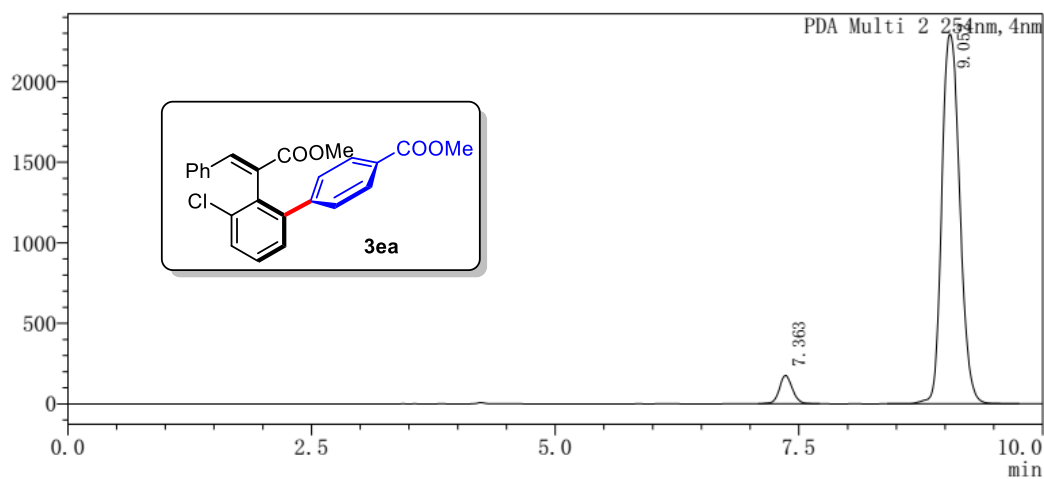

<峰表>

PDA Ch2 254nm

| 峰号 | 保留时间  | 面积       | 高度      | 面积%     |
|----|-------|----------|---------|---------|
| 1  | 7.363 | 1640230  | 175987  | 5.280   |
| 2  | 9.052 | 29424735 | 2292293 | 94.720  |
| 总计 |       | 31064966 | 2468280 | 100.000 |

<色谱图>

mAU

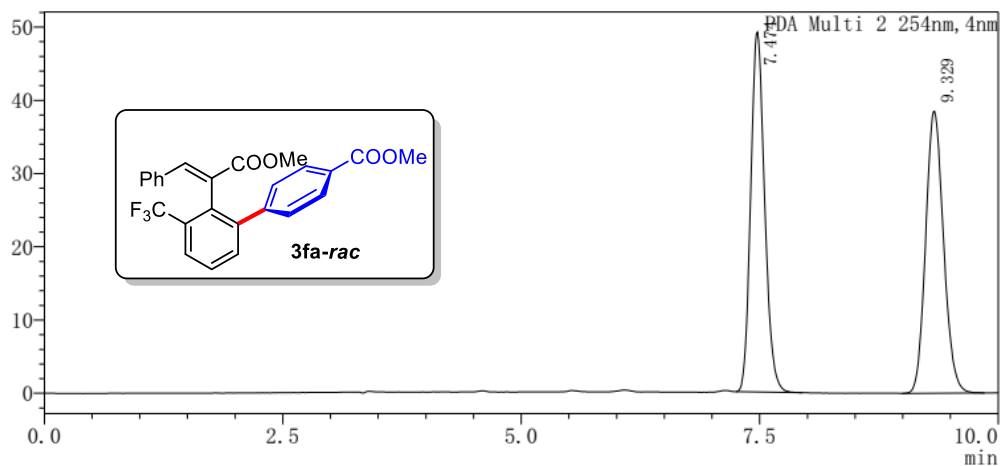

<峰表>

PDA Ch2 254nm

| 峰号 | 保留时间  | 面积      | 高度    | 面积%     |
|----|-------|---------|-------|---------|
| 1  | 7.474 | 500533  | 49126 | 49.866  |
| 2  | 9.329 | 503214  | 38475 | 50.134  |
| 总计 |       | 1003747 | 87601 | 100.000 |

<色谱图>

mAU

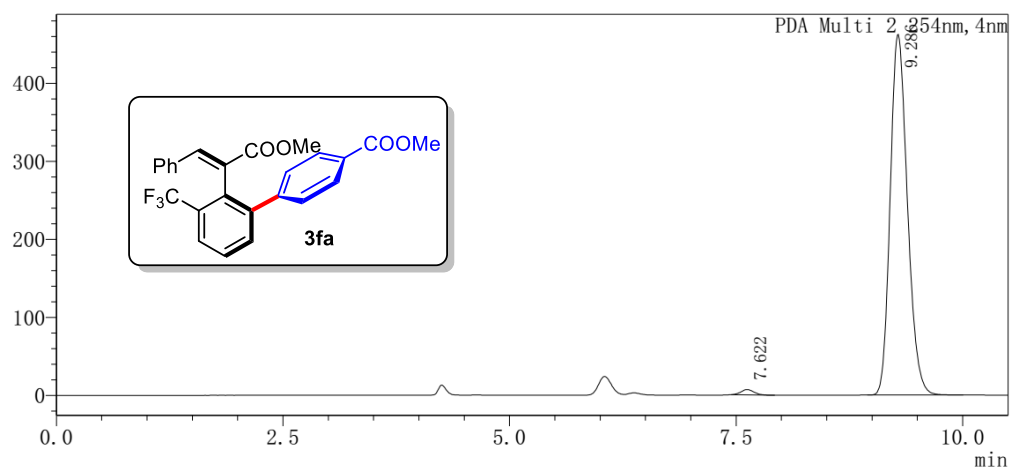

<峰表>

PDA Ch2 254nm

| 峰号 | 保留时间  | 面积      | 高度     | 面积%     |
|----|-------|---------|--------|---------|
| 1  | 7.622 | 66709   | 6753   | 1.082   |
| 2  | 9.286 | 6099946 | 462225 | 98.918  |
| 总计 |       | 6166655 | 468978 | 100.000 |



<色谱图>

mAU

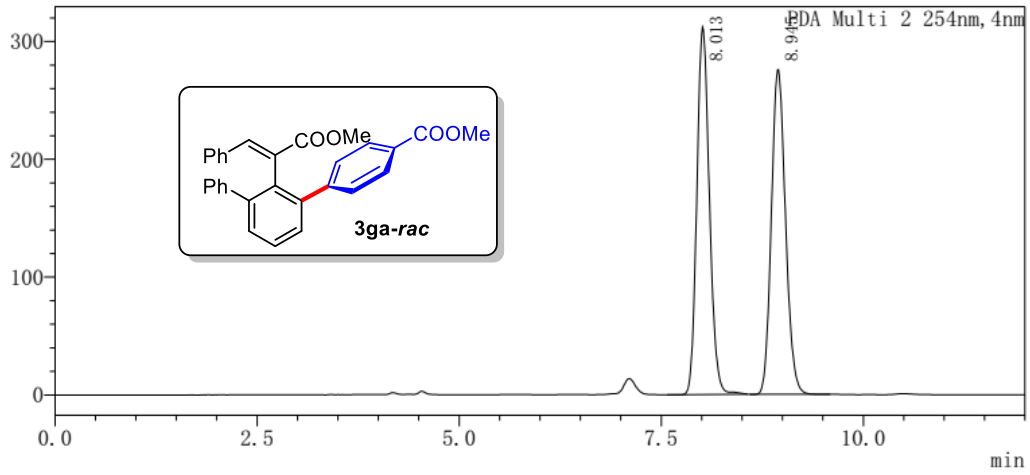

<峰表>

PDA Ch2 254nm

| 峰号 | 保留时间  | 面积      | 高度     | 面积%     |
|----|-------|---------|--------|---------|
| 1  | 8.013 | 3374854 | 311788 | 50.081  |
| 2  | 8.945 | 3363878 | 275697 | 49.919  |
| 总计 |       | 6738733 | 587484 | 100.000 |

<色谱图>

mAU

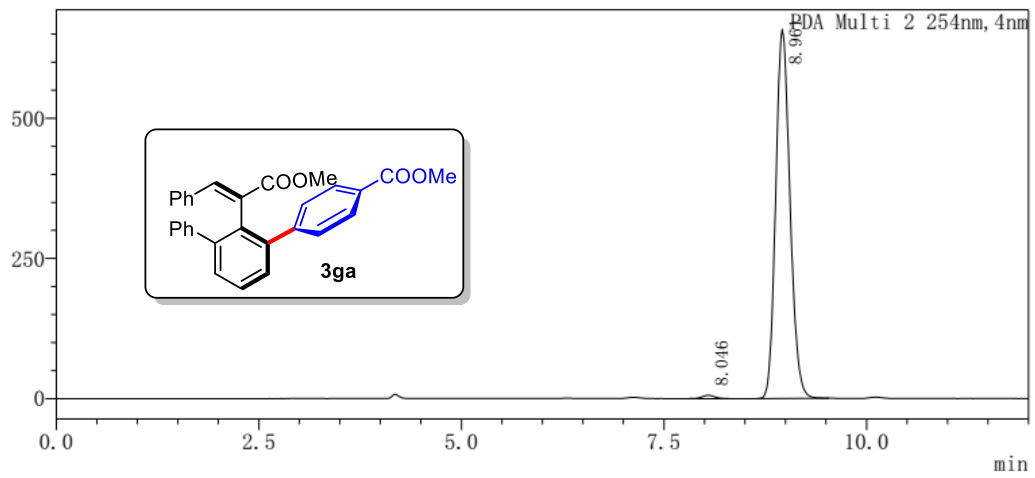

<峰表>

PDA Ch2 254nm

| 峰号 | 保留时间  | 面积      | 高度     | 面积%     |
|----|-------|---------|--------|---------|
| 1  | 8.046 | 64323   | 5884   | 0.789   |
| 2  | 8.961 | 8087884 | 656511 | 99.211  |
| 总计 |       | 8152206 | 662395 | 100.000 |

<色谱图>

mAU

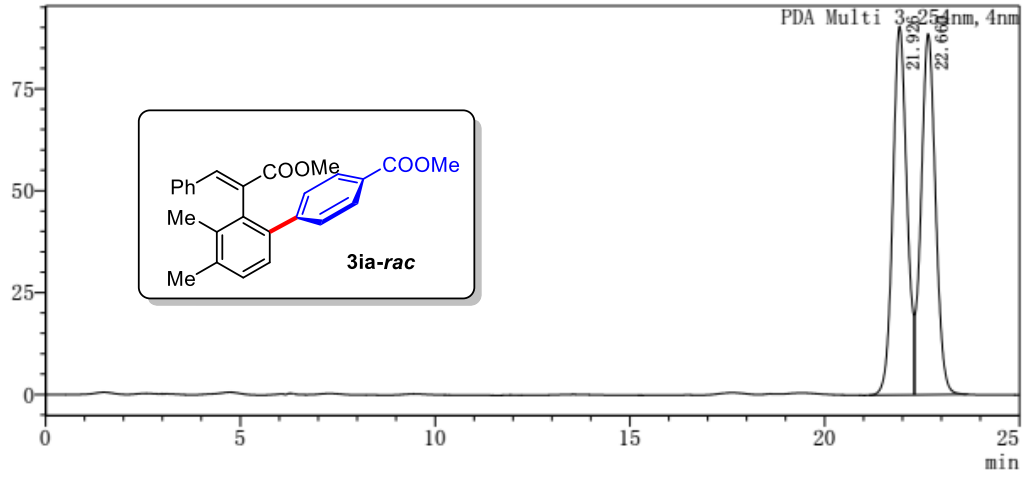

<峰表>

PDA Ch3 254nm

| 峰号 | 保留时间   | 面积      | 高度     | 面积%     |
|----|--------|---------|--------|---------|
| 1  | 21.926 | 2269496 | 90376  | 49.811  |
| 2  | 22.660 | 2286760 | 88470  | 50.189  |
| 总计 |        | 4556255 | 178846 | 100.000 |

<色谱图>

mAU

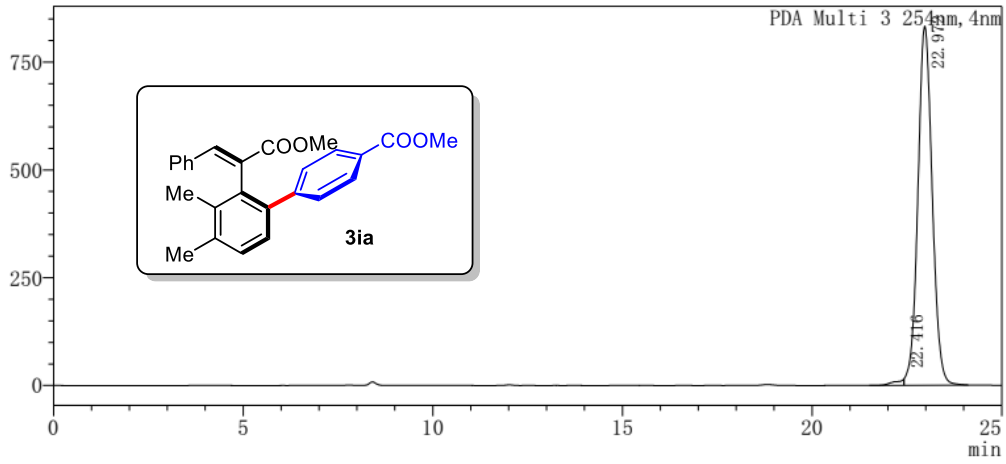

<峰表>

PDA Ch3 254nm

| 峰号 | 保留时间   | 面积       | 高度     | 面积%     |
|----|--------|----------|--------|---------|
| 1  | 22.416 | 236745   | 13720  | 1.071   |
| 2  | 22.972 | 21878587 | 832289 | 98.929  |
| 总计 |        | 22115332 | 846009 | 100.000 |

<色谱图>

mAU

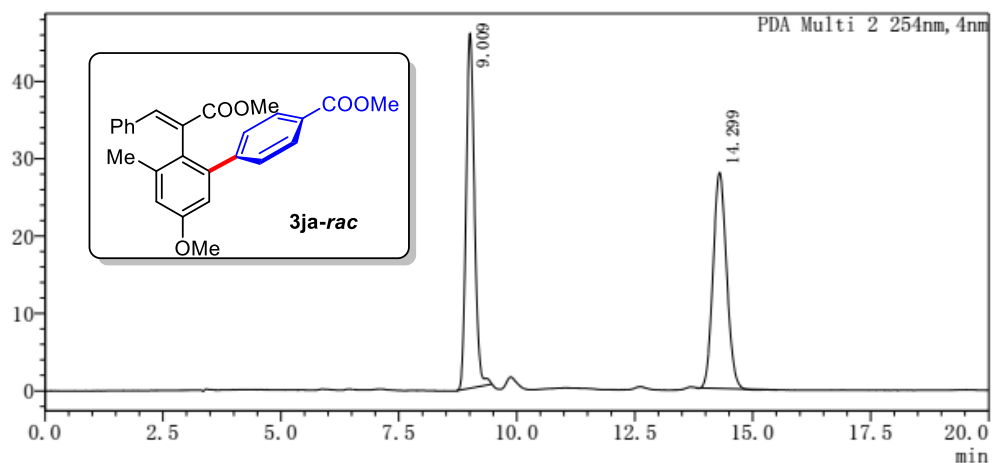

<峰表>

PDA Ch2 254nm

| 峰号 | 保留时间   | 面积      | 高度    | 面积%     |
|----|--------|---------|-------|---------|
| 1  | 9.009  | 563353  | 45850 | 50.377  |
| 2  | 14.299 | 554919  | 27884 | 49.623  |
| 总计 |        | 1118272 | 73734 | 100.000 |

<色谱图>

mAU

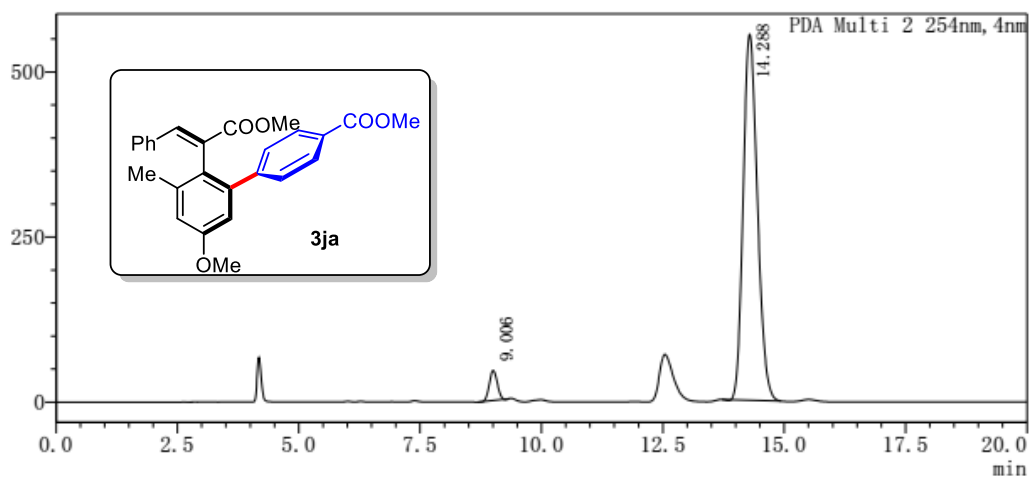

<峰表>

PDA Ch2 254nm

| 峰号 | 保留时间   | 面积       | 高度     | 面积%     |
|----|--------|----------|--------|---------|
| 1  | 9.006  | 504688   | 45088  | 4.280   |
| 2  | 14.288 | 11287402 | 554202 | 95.720  |
| 总计 |        | 11792090 | 599290 | 100.000 |

<色谱图>

mAU

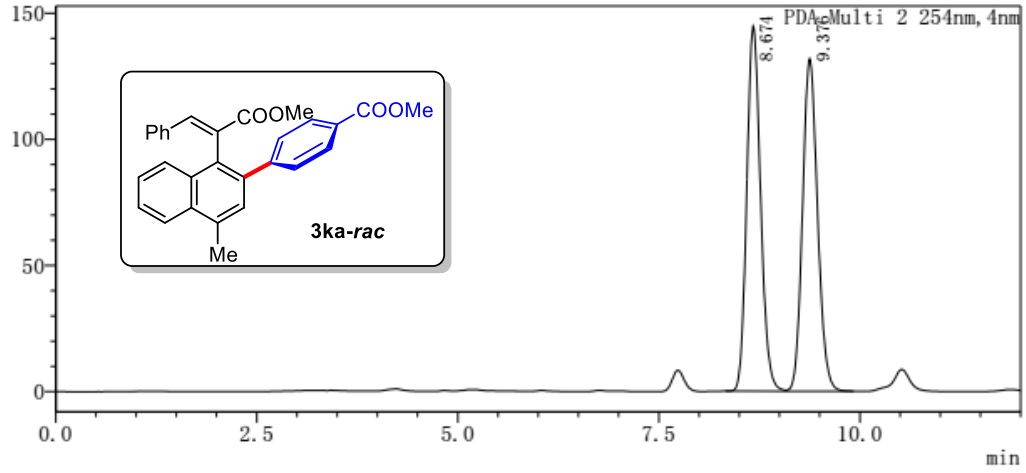

<峰表>

PDA Ch2 254nm

| 峰号 | 保留时间  | 面积      | 高度     | 面积%     |
|----|-------|---------|--------|---------|
| 1  | 8.674 | 1726022 | 144539 | 50.150  |
| 2  | 9.376 | 1715727 | 131669 | 49.850  |
| 总计 |       | 3441749 | 276208 | 100.000 |

<色谱图>

mAU

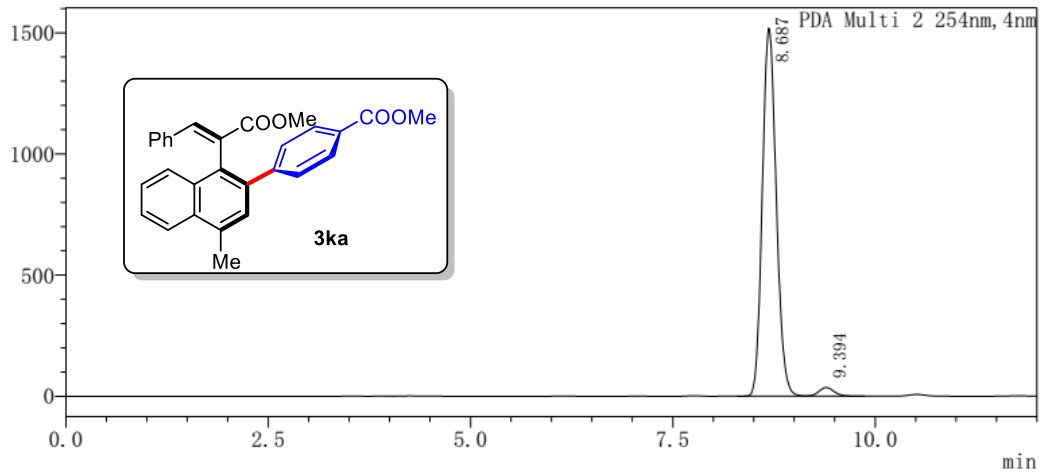

<峰表>

PDA Ch2 254nm

| 峰号 | 保留时间  | 面积       | 高度      | 面积%     |
|----|-------|----------|---------|---------|
| 1  | 8.687 | 18182538 | 1517855 | 97.479  |
| 2  | 9.394 | 470249   | 35594   | 2.521   |
| 总计 |       | 18652788 | 1553449 | 100.000 |

<色谱图>

mAU

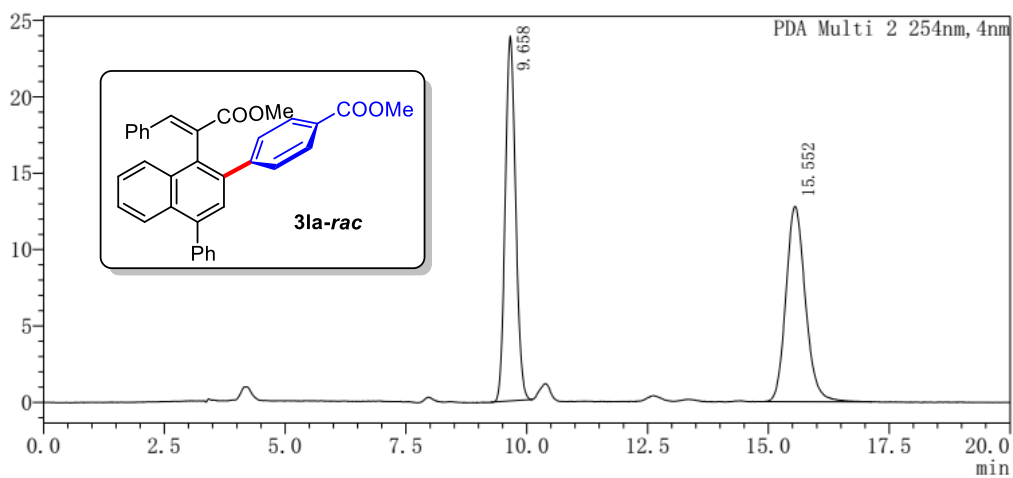

<峰表>

PDA Ch2 254nm

| 峰号 | 保留时间   | 面积     | 高度    | 面积%     |
|----|--------|--------|-------|---------|
| 1  | 9.658  | 356889 | 23831 | 49.939  |
| 2  | 15.552 | 357761 | 12777 | 50.061  |
| 总计 |        | 714650 | 36608 | 100.000 |

<色谱图>

mAU

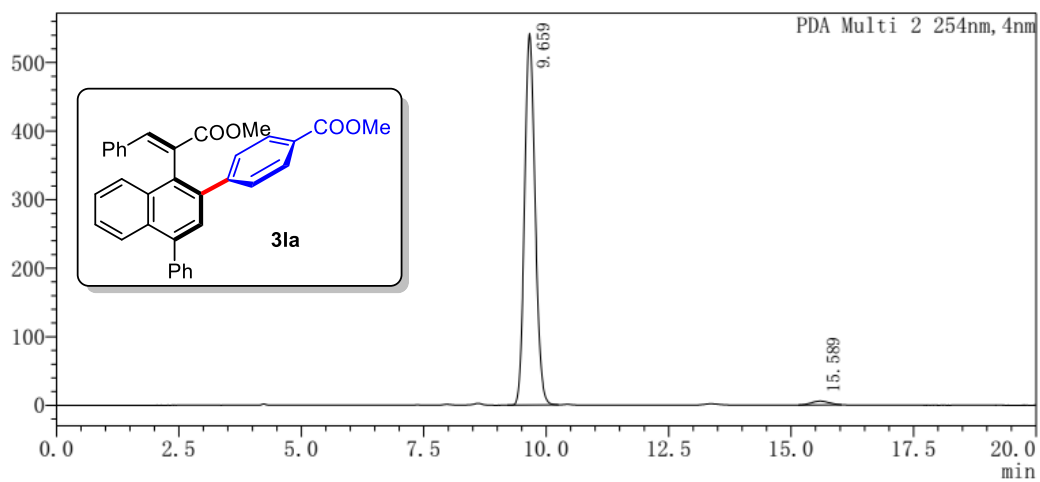

<峰表>

PDA Ch2 254nm

| 峰号 | 保留时间   | 面积      | 高度     | 面积%     |
|----|--------|---------|--------|---------|
| 1  | 9.659  | 8131373 | 541384 | 98.330  |
| 2  | 15.589 | 138116  | 5496   | 1.670   |
| 总计 |        | 8269489 | 546880 | 100.000 |

<色谱图>

mAU

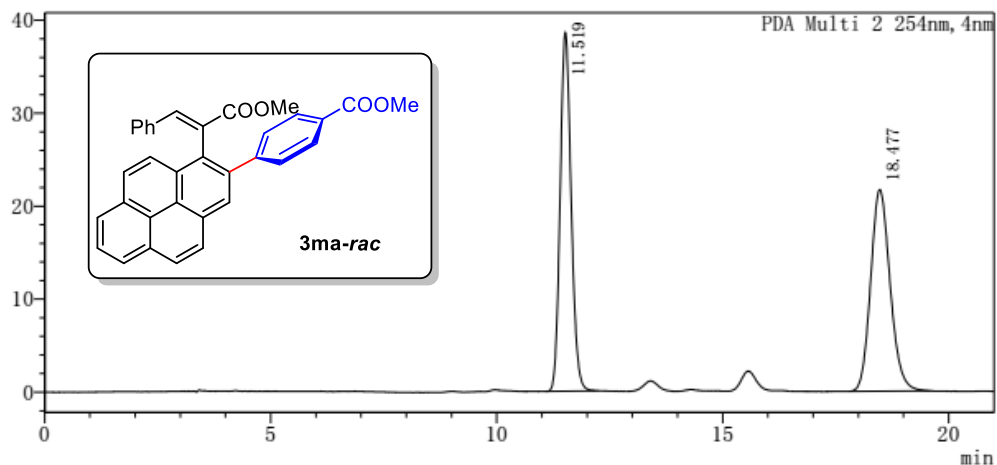

<峰表>

PDA Ch2 254nm

| 峰号 | 保留时间   | 面积      | 高度    | 面积%     |
|----|--------|---------|-------|---------|
| 1  | 11.519 | 653454  | 38541 | 50.135  |
| 2  | 18.477 | 649922  | 21679 | 49.865  |
| 总计 |        | 1303376 | 60220 | 100.000 |

<色谱图>

mAU

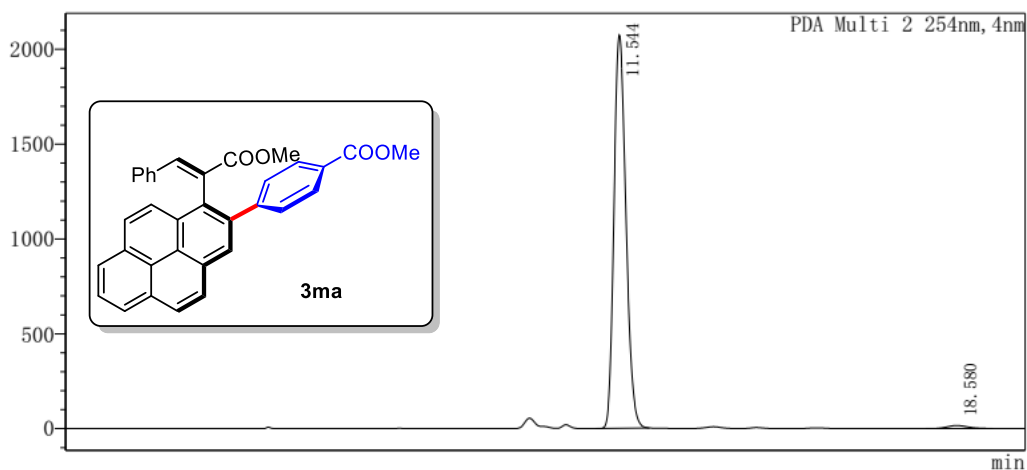

<峰表>

PDA Ch2 254nm

| 峰号 | 保留时间   | 面积       | 高度      | 面积%     |
|----|--------|----------|---------|---------|
| 1  | 11.544 | 35952226 | 2072468 | 98.680  |
| 2  | 18.580 | 480800   | 16114   | 1.320   |
| 总计 |        | 36433026 | 2088582 | 100.000 |

<色谱图>

mAU

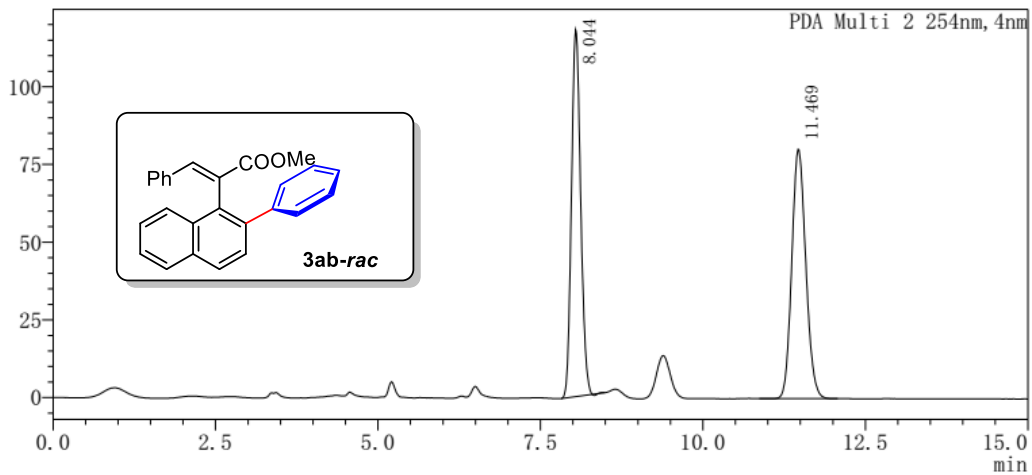

<峰表>

PDA Ch2 254nm

| 峰号 | 保留时间   | 面积      | 面积%     |
|----|--------|---------|---------|
| 1  | 8.044  | 1158333 | 49.047  |
| 2  | 11.469 | 1203334 | 50.953  |
| 总计 |        | 2361667 | 100.000 |

<色谱图>

mAU

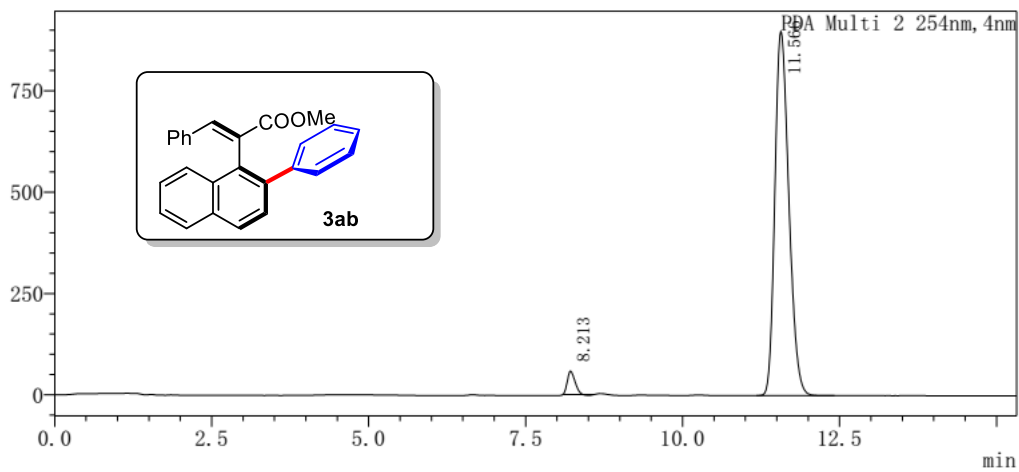

<峰表>

PDA Ch2 254nm

| 峰号 | 保留时间   | 面积       | 高度     | 面积%     |
|----|--------|----------|--------|---------|
| 1  | 8.213  | 467989   | 57453  | 3.248   |
| 2  | 11.566 | 13940383 | 897994 | 96.752  |
| 总计 |        | 14408373 | 955448 | 100.000 |

<色谱图>

mAU

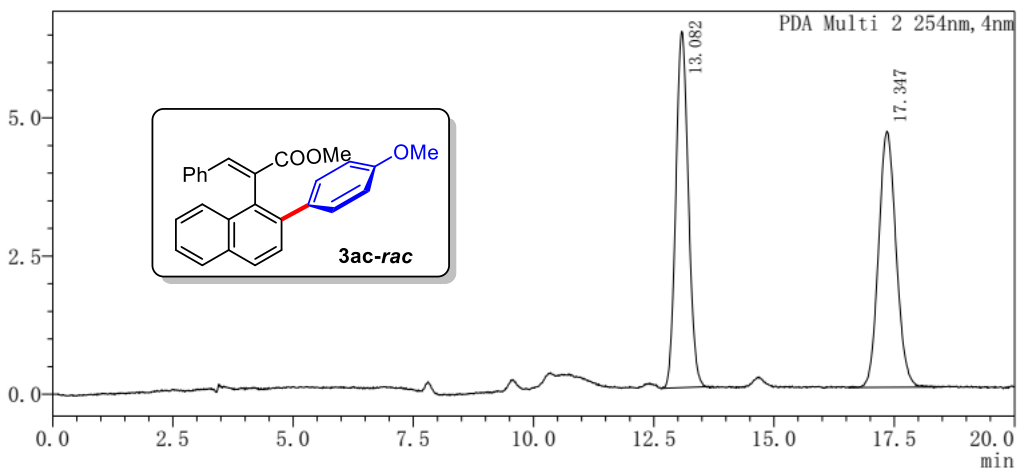

<峰表>

PDA Ch2 254nm

| 峰号 | 保留时间   | 面积     | 高度    | 面积%     |
|----|--------|--------|-------|---------|
| 1  | 13.082 | 116621 | 6442  | 49.810  |
| 2  | 17.347 | 117509 | 4630  | 50.190  |
| 总计 |        | 234130 | 11072 | 100.000 |

<色谱图>

mAU

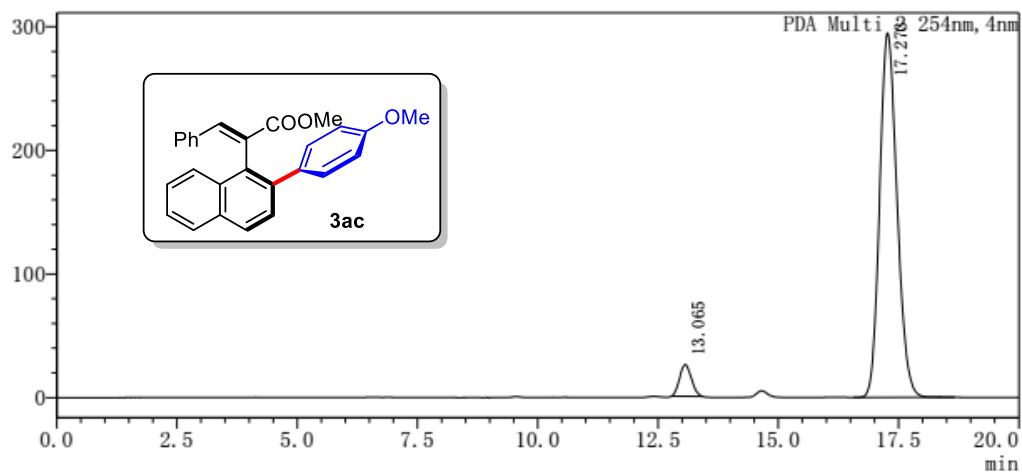

<峰表>

PDA Ch2 254nm

| 峰号 | 保留时间   | 面积      | 高度     | 面积%     |
|----|--------|---------|--------|---------|
| 1  | 13.065 | 439851  | 25616  | 5.600   |
| 2  | 17.273 | 7414111 | 294606 | 94.400  |
| 总计 |        | 7853961 | 320222 | 100.000 |



<色谱图>

mAU

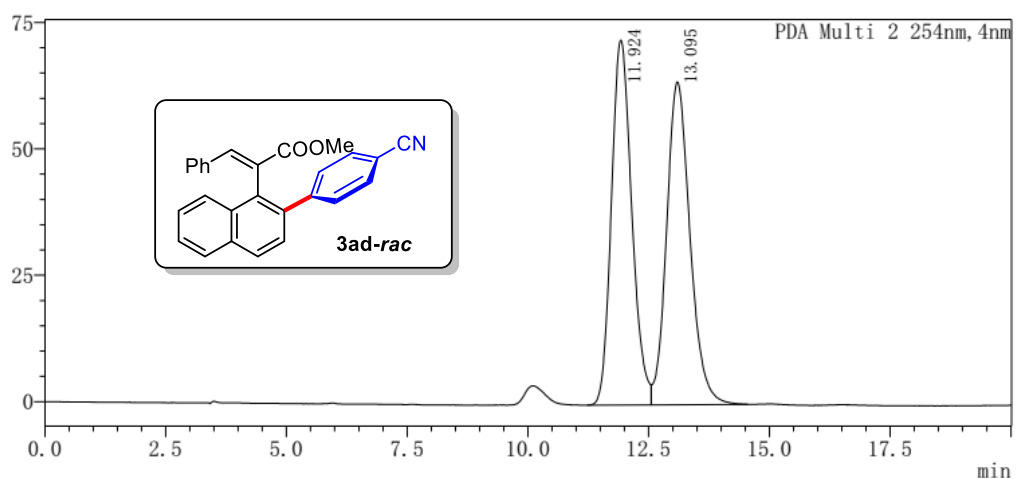

<峰表>

PDA Ch2 254nm

| 峰号 | 保留时间   | 面积      | 高度     | 面积%     |
|----|--------|---------|--------|---------|
| 1  | 11.924 | 2119048 | 72187  | 49.583  |
| 2  | 13.095 | 2154729 | 63829  | 50.417  |
| 总计 |        | 4273777 | 136016 | 100.000 |

<色谱图>

mAU

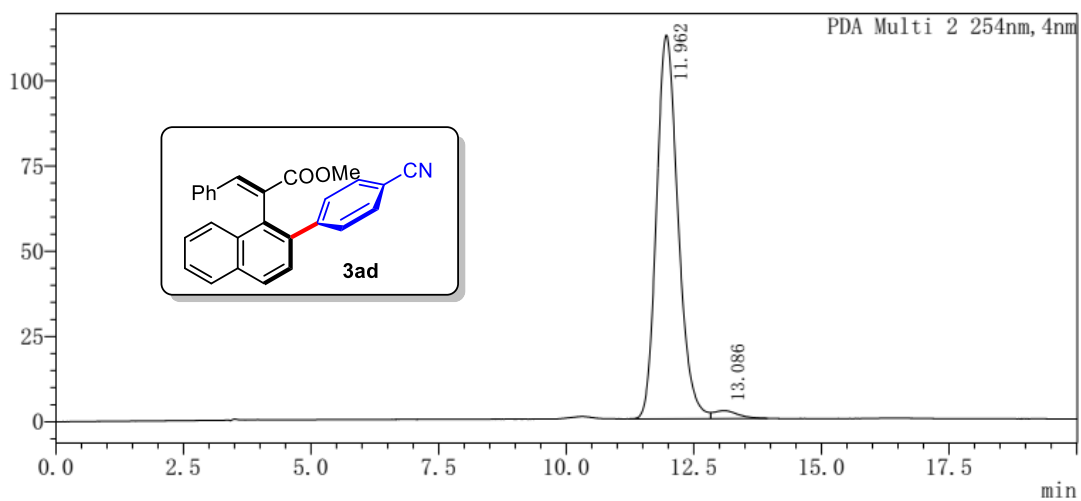

<峰表>

PDA Ch2 254nm

| 峰号 | 保留时间   | 面积      | 高度     | 面积%     |
|----|--------|---------|--------|---------|
| 1  | 11.962 | 3301767 | 112452 | 97.778  |
| 2  | 13.086 | 75039   | 2299   | 2.222   |
| 总计 |        | 3376806 | 114751 | 100.000 |

<色谱图>

mAU

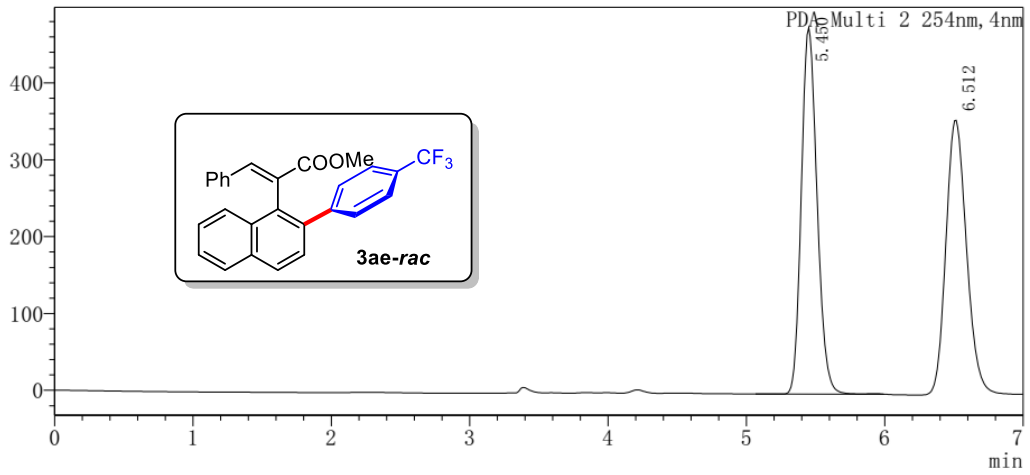

<峰表>

PDA Ch2 254nm

| 峰号 | 保留时间  | 面积      | 高度     | 面积%     |
|----|-------|---------|--------|---------|
| 1  | 5.450 | 3763830 | 476521 | 50.564  |
| 2  | 6.512 | 3679893 | 356882 | 49.436  |
| 总计 |       | 7443723 | 833403 | 100.000 |

<色谱图>

mAU

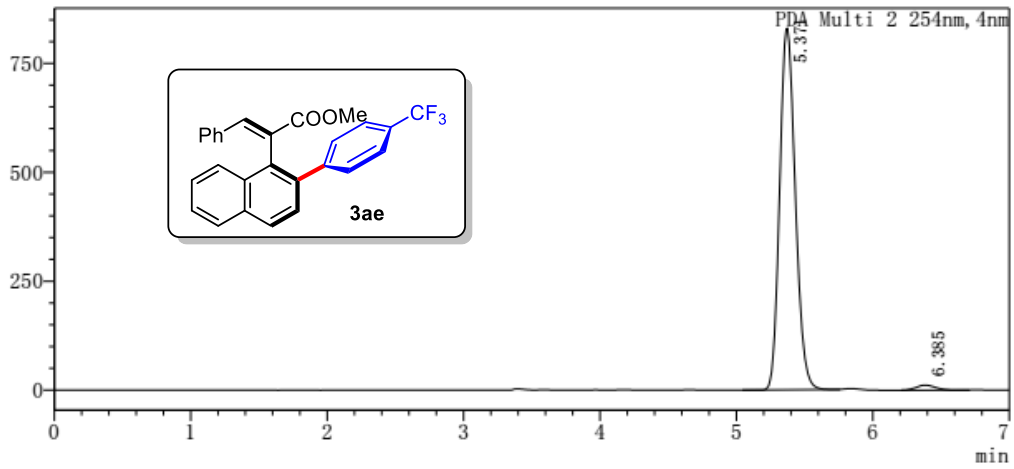

<峰表>

PDA Ch2 254nm

| 峰号 | 保留时间  | 面积      | 高度     | 面积%     |
|----|-------|---------|--------|---------|
| 1  | 5.371 | 6610841 | 828311 | 98.417  |
| 2  | 6.385 | 106351  | 11200  | 1.583   |
| 总计 |       | 6717192 | 839511 | 100.000 |

<色谱图>

mAU

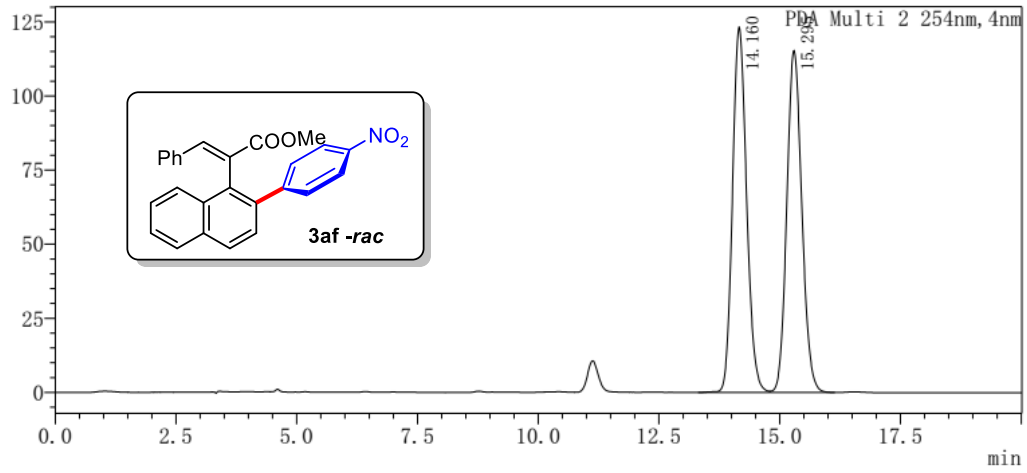

<峰表>

PDA Ch2 254nm

| 峰号 | 保留时间   | 面积      | 高度     | 面积%     |
|----|--------|---------|--------|---------|
| 1  | 14.160 | 2504821 | 123275 | 50.070  |
| 2  | 15.295 | 2497794 | 115295 | 49.930  |
| 总计 |        | 5002615 | 238570 | 100.000 |

<色谱图>

mAU

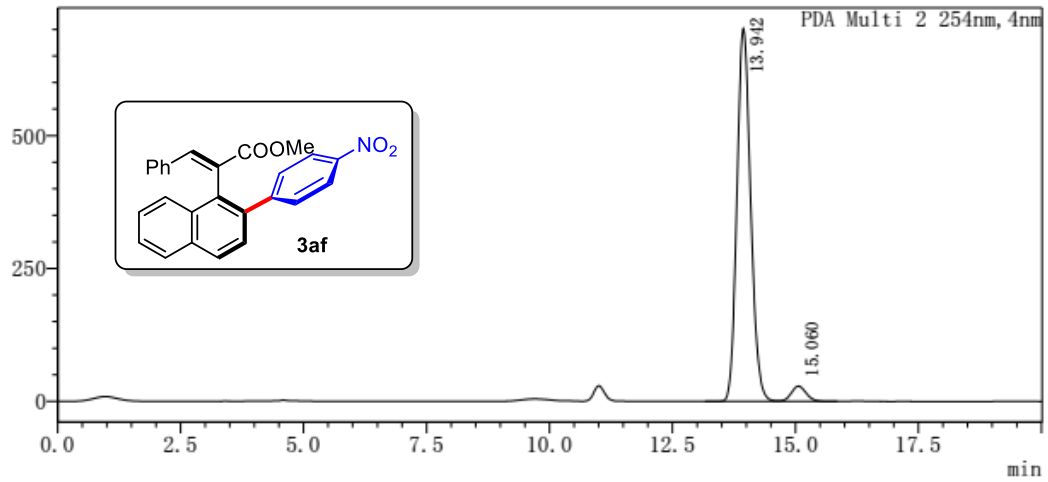

<峰表>

PDA Ch2 254nm

| 峰号 | 保留时间   | 面积       | 高度     | 面积%     |
|----|--------|----------|--------|---------|
| 1  | 13.942 | 13613893 | 701233 | 95.728  |
| 2  | 15.060 | 607613   | 28714  | 4.272   |
| 总计 |        | 14221506 | 729947 | 100.000 |

<色谱图>

mAU

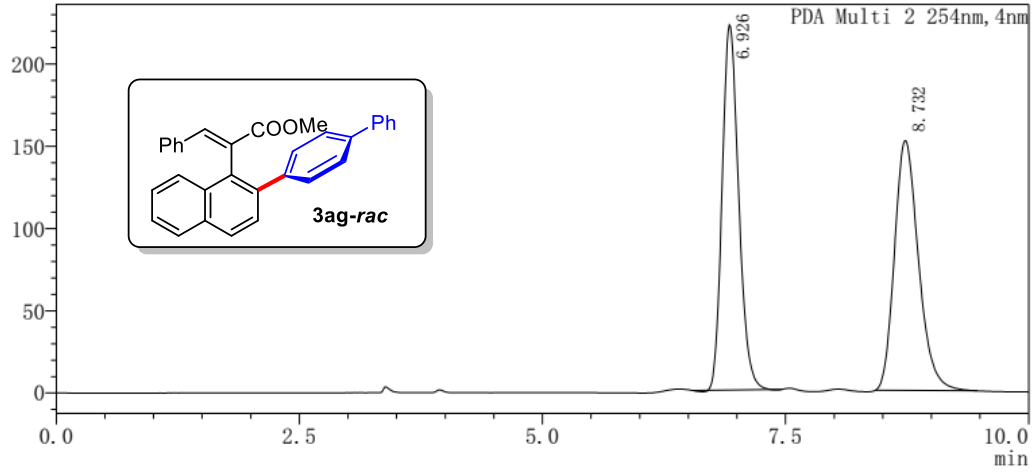

<峰表>

PDA Ch2 254nm

| 峰号 | 保留时间  | 面积      | 高度     | 面积%     |
|----|-------|---------|--------|---------|
| 1  | 6.926 | 2620836 | 221892 | 50.093  |
| 2  | 8.732 | 2611140 | 151835 | 49.907  |
| 总计 |       | 5231975 | 373727 | 100.000 |

<色谱图>

mAU

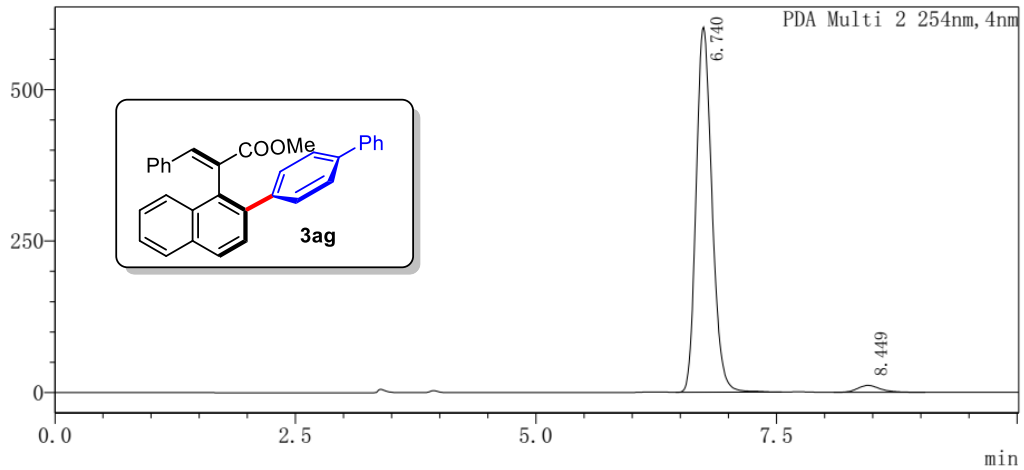

<峰表>

PDA Ch2 254nm

| 峰号 | 保留时间  | 面积      | 高度     | 面积%     |
|----|-------|---------|--------|---------|
| 1  | 6.740 | 6920364 | 602365 | 97.333  |
| 2  | 8.449 | 189658  | 11420  | 2.667   |
| 总计 |       | 7110022 | 613785 | 100.000 |

<色谱图>

mAU

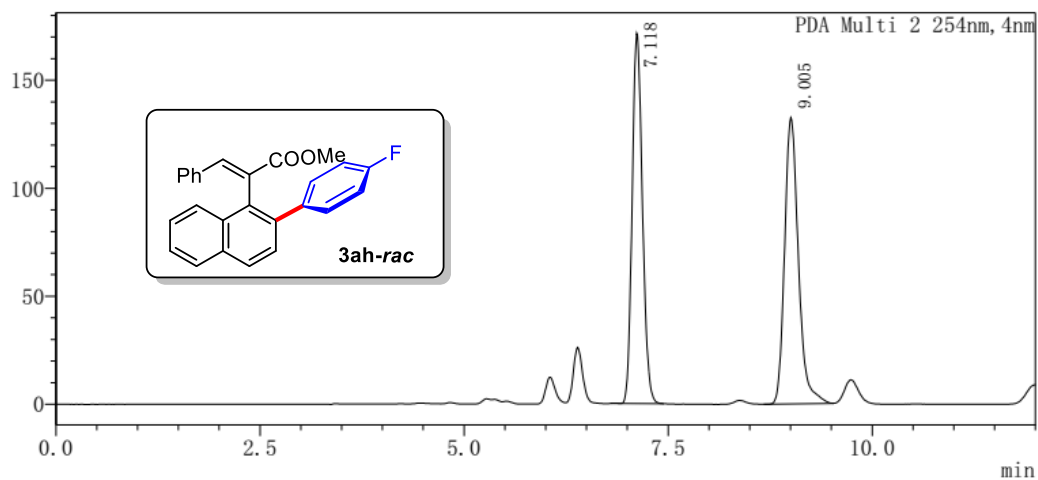

<峰表>

PDA Ch2 254nm

| 峰号 | 保留时间  | 面积      | 高度     | 面积%     |
|----|-------|---------|--------|---------|
| 1  | 7.118 | 1495804 | 171211 | 49.016  |
| 2  | 9.005 | 1555887 | 132441 | 50.984  |
| 总计 |       | 3051691 | 303652 | 100.000 |

<色谱图>

mAU

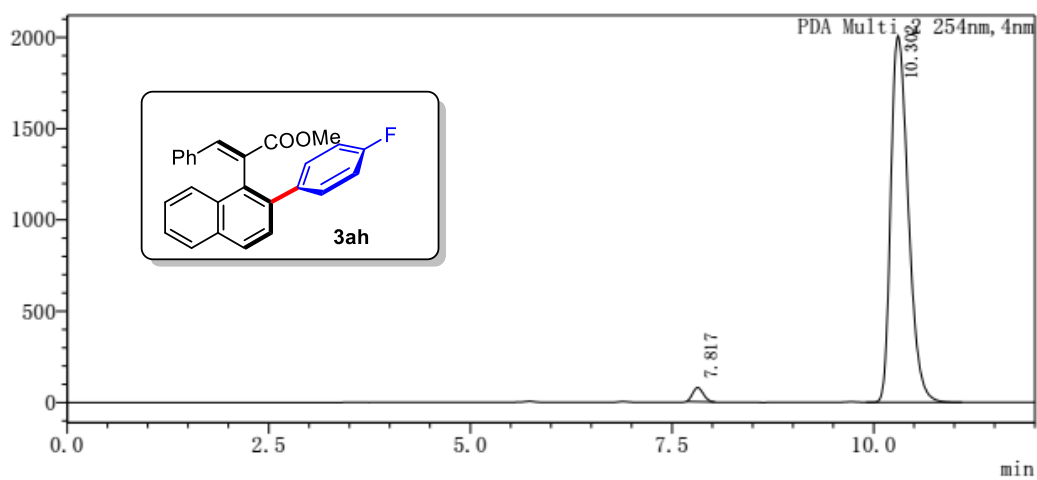

<峰表>

PDA Ch2 254nm

| 峰号 | 保留时间   | 面积       | 高度      | 面积%     |
|----|--------|----------|---------|---------|
| 1  | 7.817  | 705638   | 77200   | 2.269   |
| 2  | 10.302 | 30396659 | 2007779 | 97.731  |
| 总计 |        | 31102296 | 2084979 | 100.000 |

<色谱图>

mAU

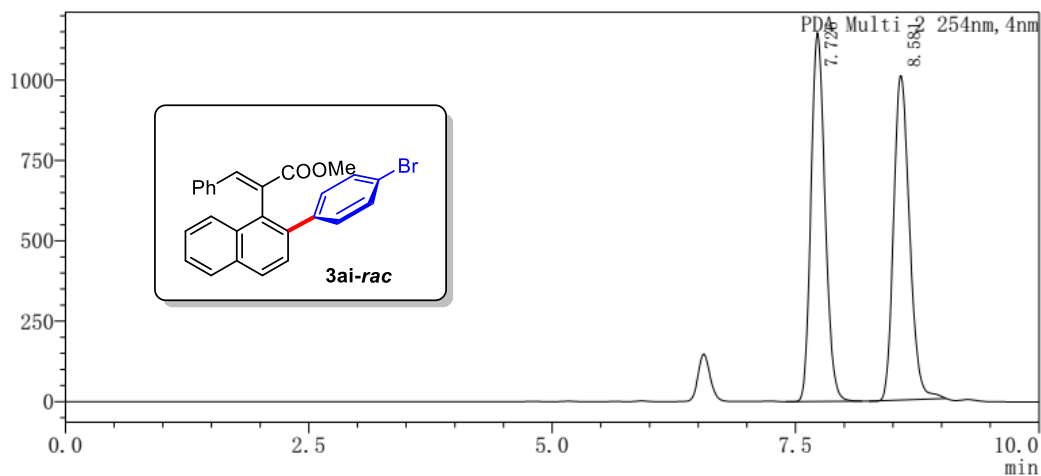

<峰表>

PDA Ch2 254nm

| 峰号 | 保留时间  | 面积       | 高度      | 面积%     |
|----|-------|----------|---------|---------|
| 1  | 7.726 | 11515617 | 1146073 | 50.025  |
| 2  | 8.581 | 11504209 | 1007855 | 49.975  |
| 总计 |       | 23019826 | 2153928 | 100.000 |

<色谱图>

mAU

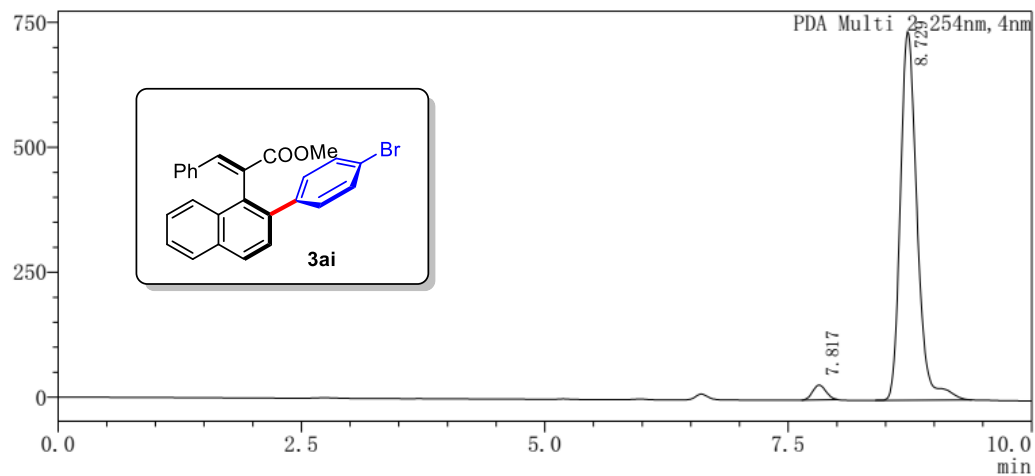

<峰表>

PDA Ch2 254nm

| 峰号 | 保留时间  | 面积      | 高度     | 面积%     |
|----|-------|---------|--------|---------|
| 1  | 7.817 | 284109  | 29688  | 3.124   |
| 2  | 8.729 | 8809328 | 736971 | 96.876  |
| 总计 |       | 9093436 | 766659 | 100.000 |

<色谱图>

mAU

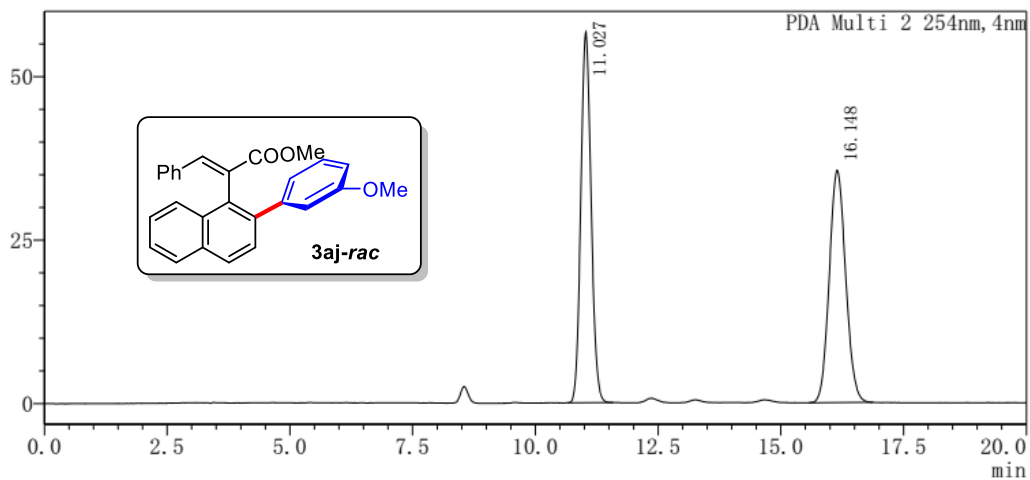

<峰表>

PDA Ch2 254nm

| 峰号 | 保留时间   | 面积      | 高度    | 面积%     |
|----|--------|---------|-------|---------|
| 1  | 11.027 | 826593  | 56695 | 50.021  |
| 2  | 16.148 | 825905  | 35549 | 49.979  |
| 总计 |        | 1652498 | 92244 | 100.000 |

<色谱图>

mAU

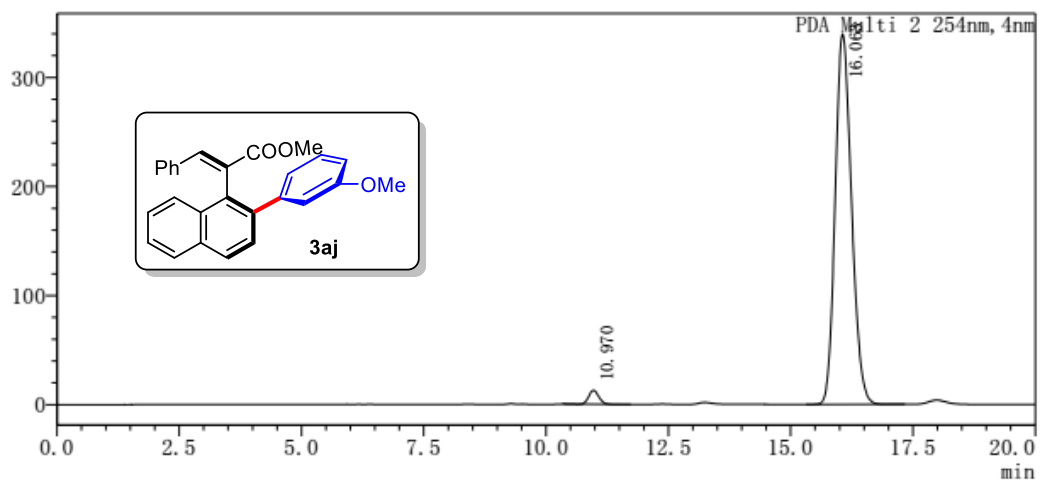

<峰表>

PDA Ch2 254nm

| 峰号 | 保留时间   | 面积      | 高度     | 面积%     |
|----|--------|---------|--------|---------|
| 1  | 10.970 | 178560  | 12653  | 2.204   |
| 2  | 16.063 | 7922818 | 339446 | 97.796  |
| 总计 |        | 8101378 | 352099 | 100.000 |

<色谱图>

mAU

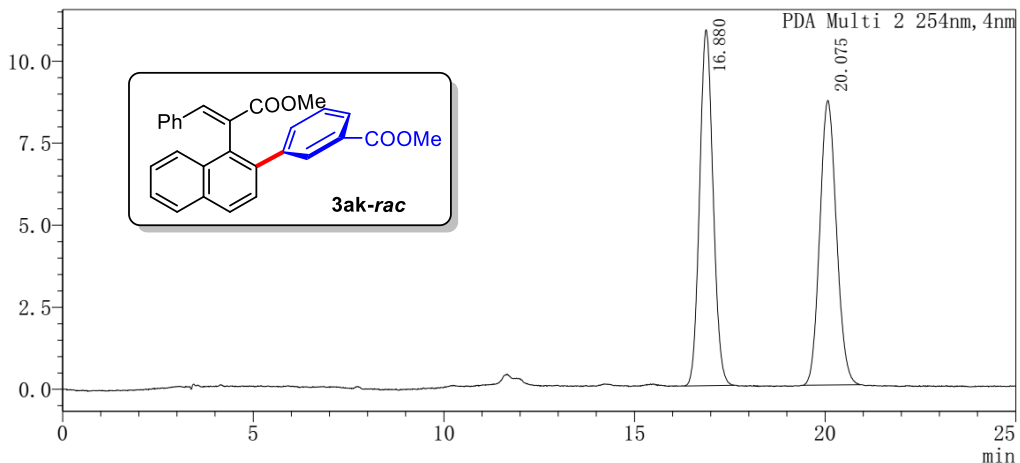

<峰表>

PDA Ch2 254nm

| 峰号 | 保留时间   | 面积     | 高度    | 面积%     |
|----|--------|--------|-------|---------|
| 1  | 16.880 | 266855 | 10847 | 50.259  |
| 2  | 20.075 | 264101 | 8672  | 49.741  |
| 总计 |        | 530956 | 19519 | 100.000 |

<色谱图>

mAU

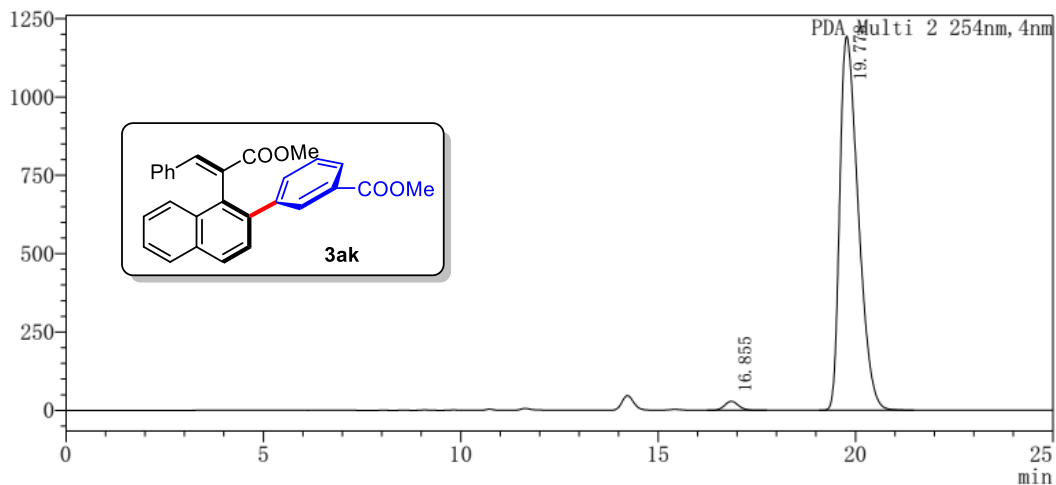

<峰表>

PDA Ch2 254nm

| 峰号 | 保留时间   | 面积       | 高度      | 面积%     |
|----|--------|----------|---------|---------|
| 1  | 16.855 | 702995   | 28689   | 1.776   |
| 2  | 19.778 | 38875196 | 1193327 | 98.224  |
| 总计 |        | 39578191 | 1222016 | 100.000 |



<色谱图>

mAU

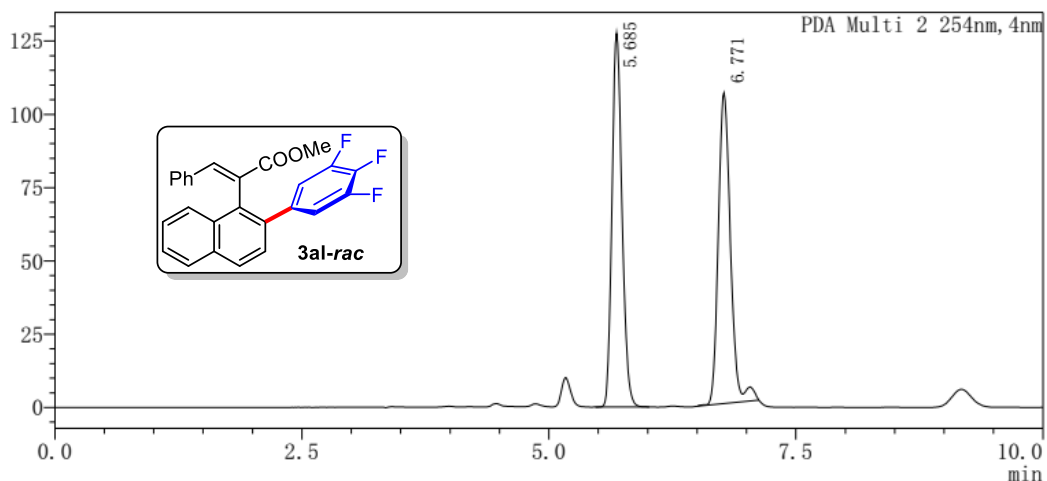

<峰表>

PDA Ch2 254nm

| 峰号 | 保留时间  | 面积      | 高度     | 面积%     |
|----|-------|---------|--------|---------|
| 1  | 5.685 | 902374  | 127459 | 49.811  |
| 2  | 6.771 | 909232  | 105990 | 50.189  |
| 总计 |       | 1811607 | 233450 | 100.000 |

<色谱图>

mAU

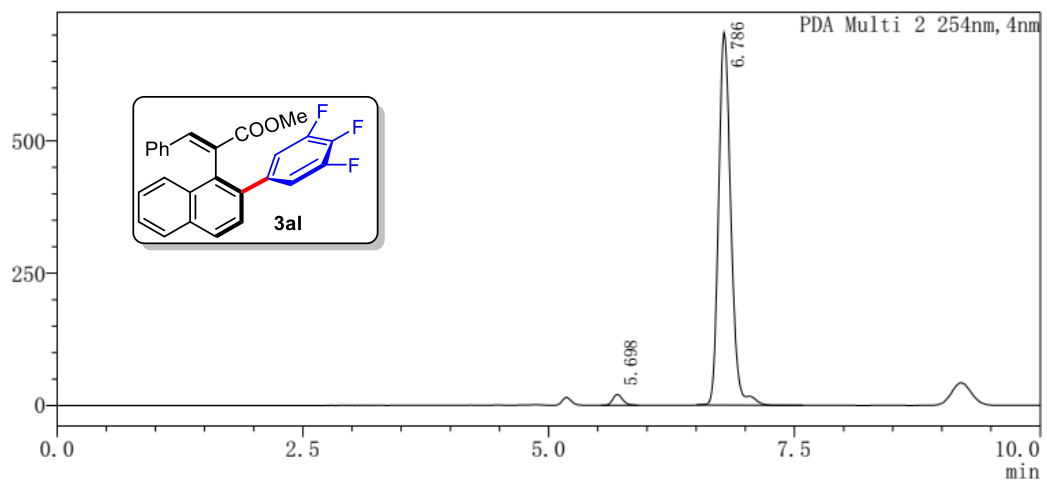

<峰表>

PDA Ch2 254nm

| 峰号 | 保留时间  | 面积      | 高度     | 面积%     |
|----|-------|---------|--------|---------|
| 1  | 5.698 | 144286  | 20333  | 2.310   |
| 2  | 6.786 | 6101068 | 702674 | 97.690  |
| 总计 |       | 6245354 | 723007 | 100.000 |

<色谱图>

mAU

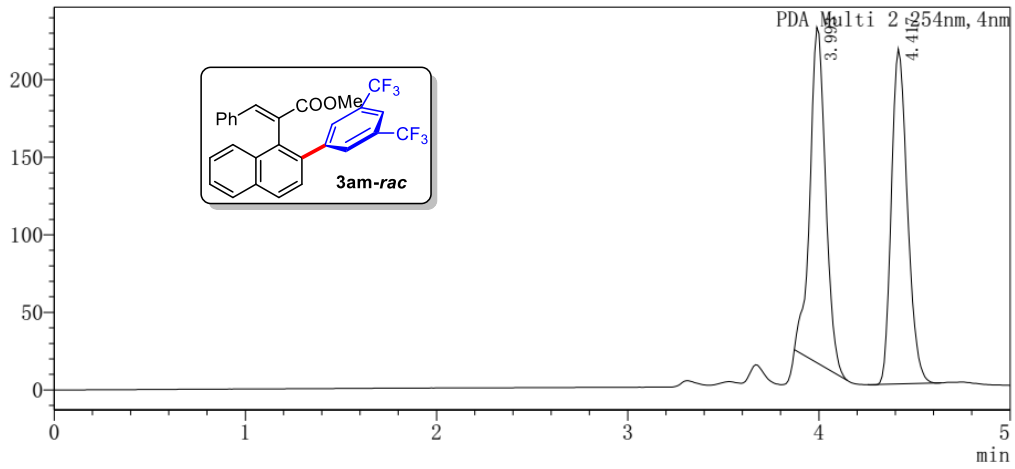

<峰表>

PDA Ch2 254nm

| 峰号 | 保留时间  | 面积      | 高度     | 面积%     |
|----|-------|---------|--------|---------|
| 1  | 3.993 | 1229543 | 216391 | 49.384  |
| 2  | 4.417 | 1260231 | 216112 | 50.616  |
| 总计 |       | 2489774 | 432503 | 100.000 |

<色谱图>

mAU

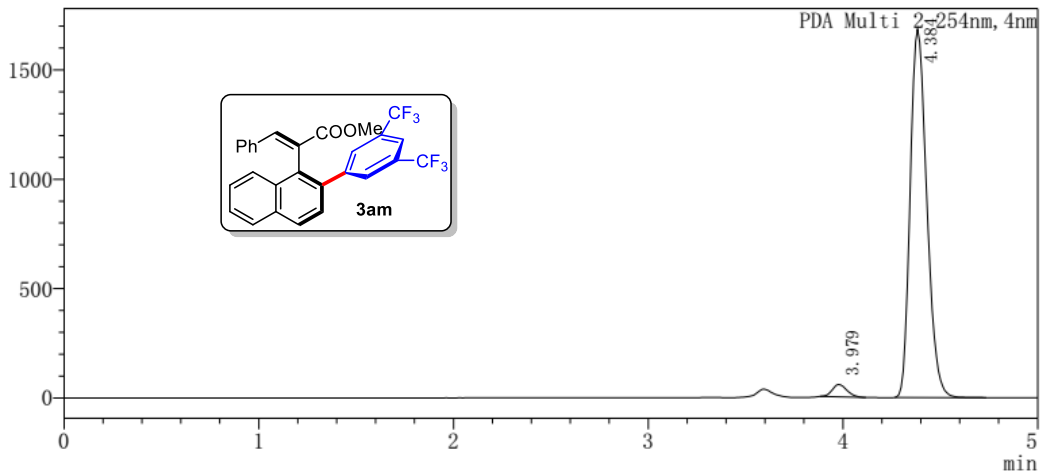

<峰表>

PDA Ch2 254nm

| 峰号 | 保留时间  | 面积       | 高度      | 面积%     |
|----|-------|----------|---------|---------|
| 1  | 3.979 | 291438   | 56346   | 2.833   |
| 2  | 4.384 | 9995644  | 1684411 | 97.167  |
| 总计 |       | 10287082 | 1740757 | 100.000 |

<色谱图>

mAU

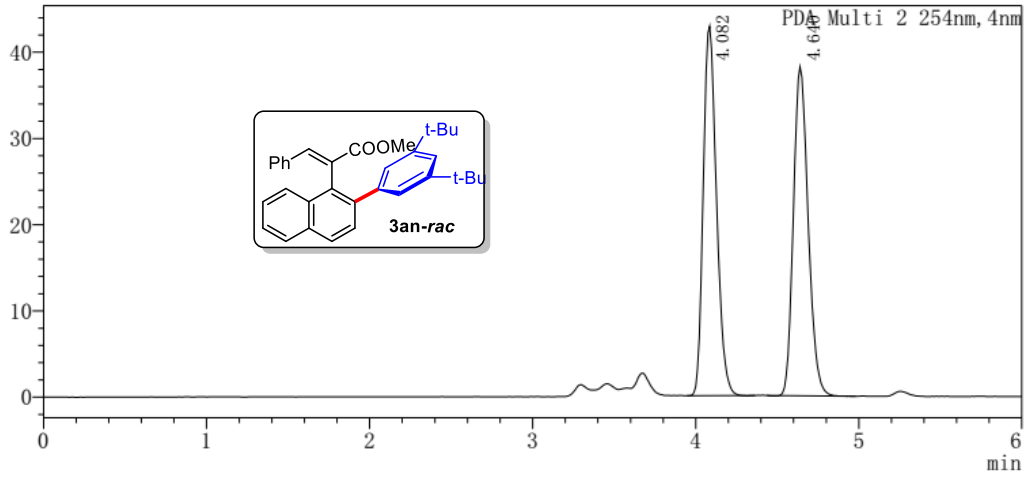

<峰表>

PDA Ch2 254nm

| 峰号 | 保留时间  | 面积     | 高度    | 面积%     |
|----|-------|--------|-------|---------|
| 1  | 4.082 | 241064 | 42818 | 50.088  |
| 2  | 4.640 | 240218 | 38135 | 49.912  |
| 总计 |       | 481282 | 80952 | 100.000 |

<色谱图>

mAU

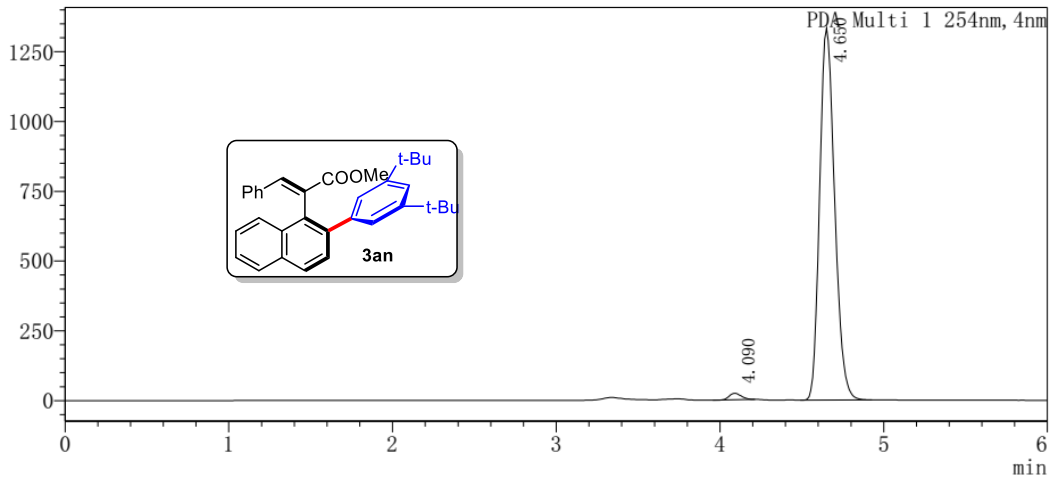

<峰表>

PDA Ch1 254nm

| 峰号 | 保留时间  | 面积      | 高度      | 浓度    | 面积%     |
|----|-------|---------|---------|-------|---------|
| 1  | 4.090 | 117348  | 22599   | 0.000 | 1.360   |
| 2  | 4.650 | 8508210 | 1332122 | 0.000 | 98.640  |
| 总计 |       | 8625558 | 1354721 |       | 100.000 |

<色谱图>

mAU

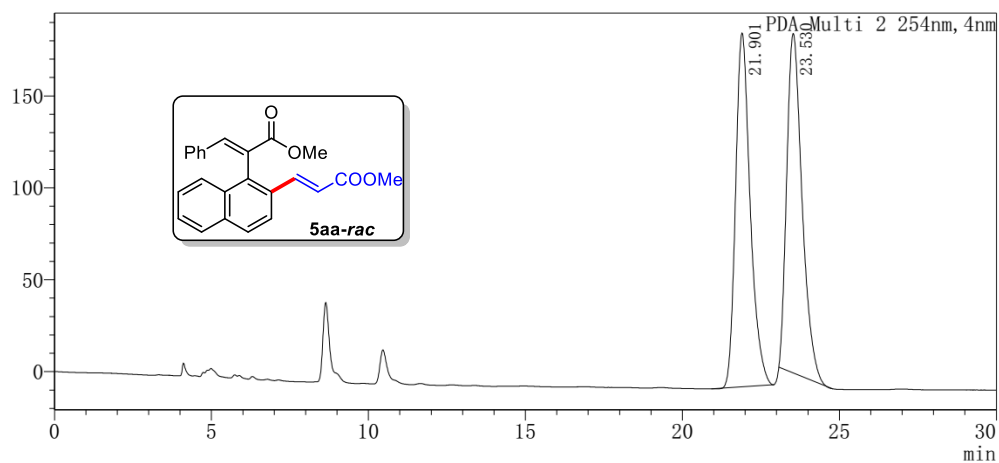

<峰表>

PDA Ch2 254nm

| 峰号 | 保留时间   | 面积       | 高度     | 面积%     |
|----|--------|----------|--------|---------|
| 1  | 21.901 | 6239385  | 192415 | 49.944  |
| 2  | 23.530 | 6253478  | 184703 | 50.056  |
| 总计 |        | 12492863 | 377118 | 100.000 |

<色谱图>

mAU

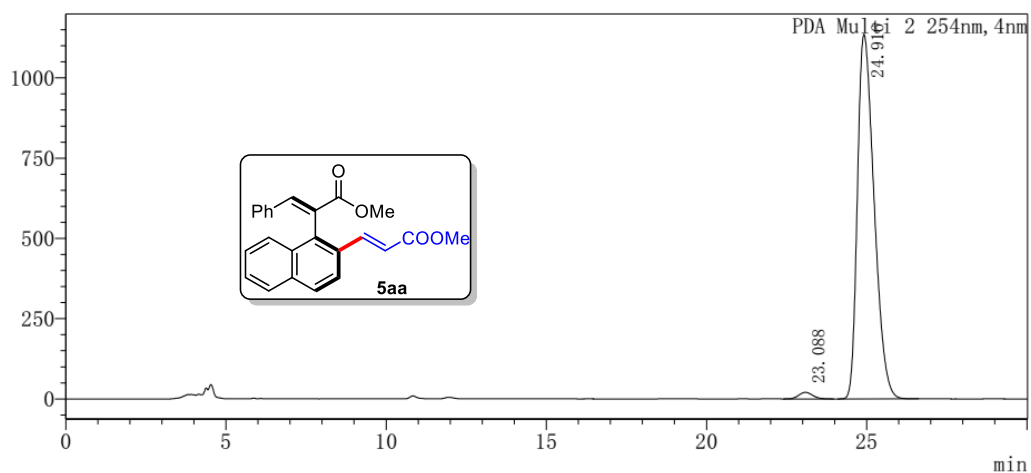

<峰表>

PDA Ch2 254nm

| 峰号 | 保留时间   | 面积       | 高度      | 面积%     |
|----|--------|----------|---------|---------|
| 1  | 23.088 | 617452   | 20417   | 1.480   |
| 2  | 24.916 | 41089541 | 1135557 | 98.520  |
| 总计 |        | 41706993 | 1155974 | 100.000 |

<色谱图>

mAU

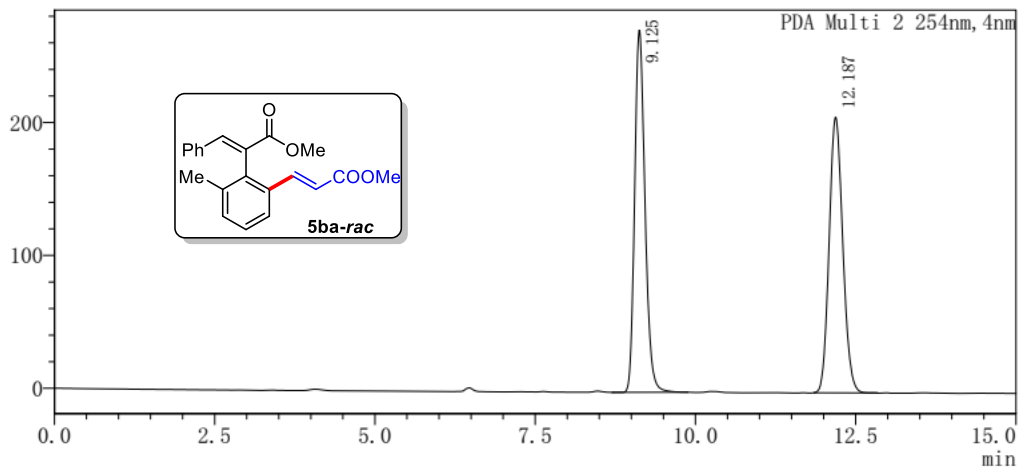

<峰表>

PDA Ch2 254nm

| 峰号 | 保留时间   | 面积      | 高度     | 面积%     |
|----|--------|---------|--------|---------|
| 1  | 9.125  | 3068384 | 272482 | 49.998  |
| 2  | 12.187 | 3068652 | 207395 | 50.002  |
| 总计 |        | 6137036 | 479877 | 100.000 |

<色谱图>

mAU

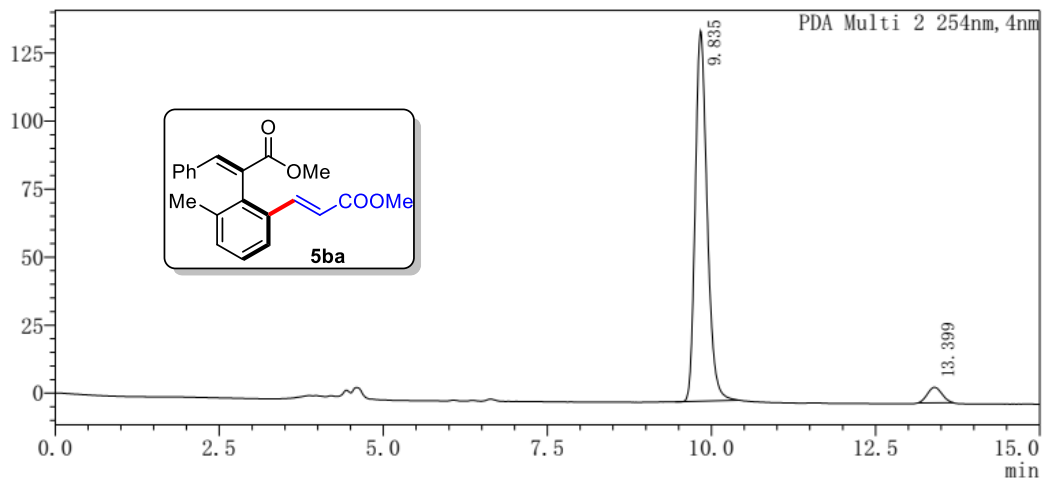

<峰表>

PDA Ch2 254nm

| 峰号 | 保留时间   | 面积      | 高度     | 面积%     |
|----|--------|---------|--------|---------|
| 1  | 9.835  | 1718070 | 135961 | 95.190  |
| 2  | 13.399 | 86816   | 5680   | 4.810   |
| 总计 |        | 1804887 | 141641 | 100.000 |

<色谱图>

mAU

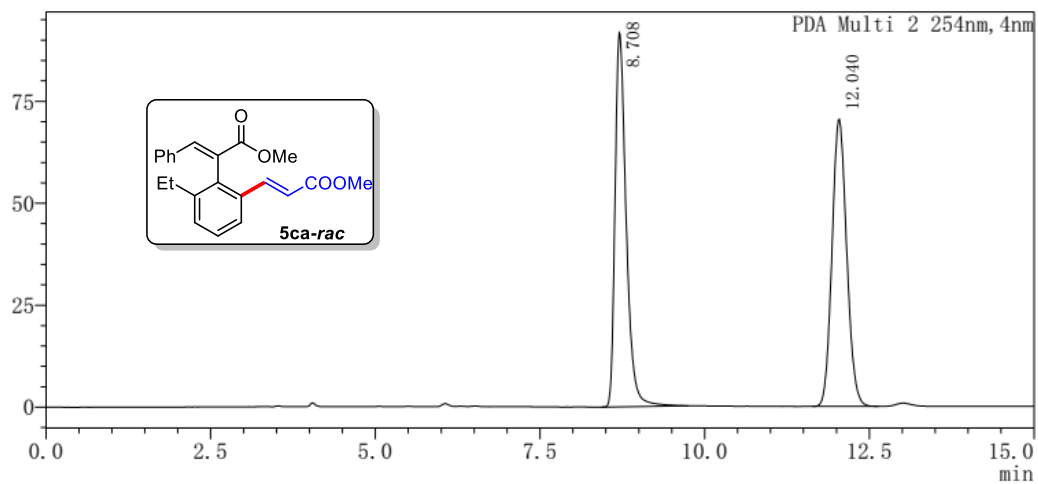

<峰表>

PDA Ch2 254nm

| 峰号 | 保留时间   | 面积      | 高度     | 面积%     |
|----|--------|---------|--------|---------|
| 1  | 8.708  | 1078402 | 91688  | 49.656  |
| 2  | 12.040 | 1093324 | 70388  | 50.344  |
| 总计 |        | 2171726 | 162077 | 100.000 |

<色谱图>

mAU

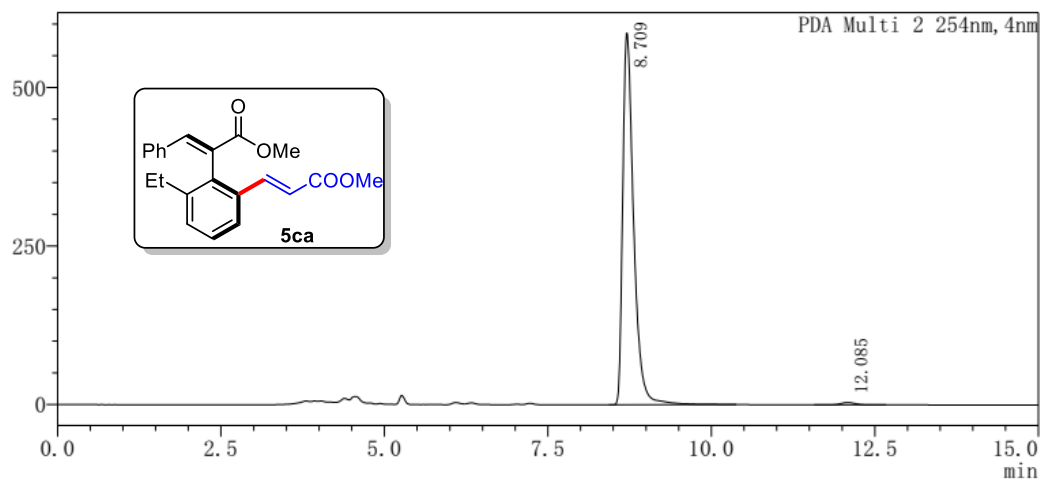

<峰表>

PDA Ch2 254nm

| 峰号 | 保留时间   | 面积      | 高度     | 面积%     |
|----|--------|---------|--------|---------|
| 1  | 8.709  | 6828216 | 585628 | 99.180  |
| 2  | 12.085 | 56480   | 3692   | 0.820   |
| 总计 |        | 6884696 | 589319 | 100.000 |

<色谱图>

mAU

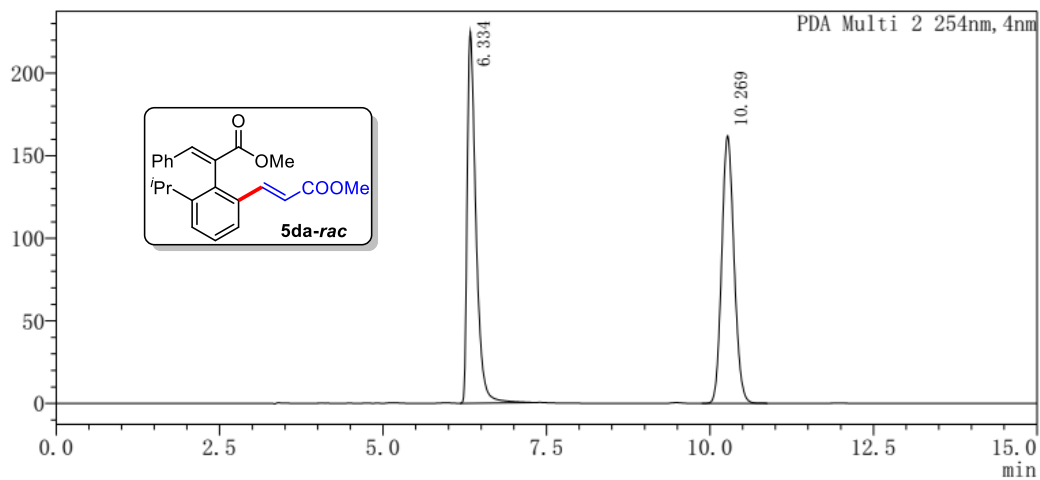

<峰表>

PDA Ch2 254nm

| 峰号 | 保留时间   | 面积      | 高度     | 面积%     |
|----|--------|---------|--------|---------|
| 1  | 6.334  | 2090807 | 224734 | 49.589  |
| 2  | 10.269 | 2125475 | 162032 | 50.411  |
| 总计 |        | 4216282 | 386766 | 100.000 |

<色谱图>

mAU

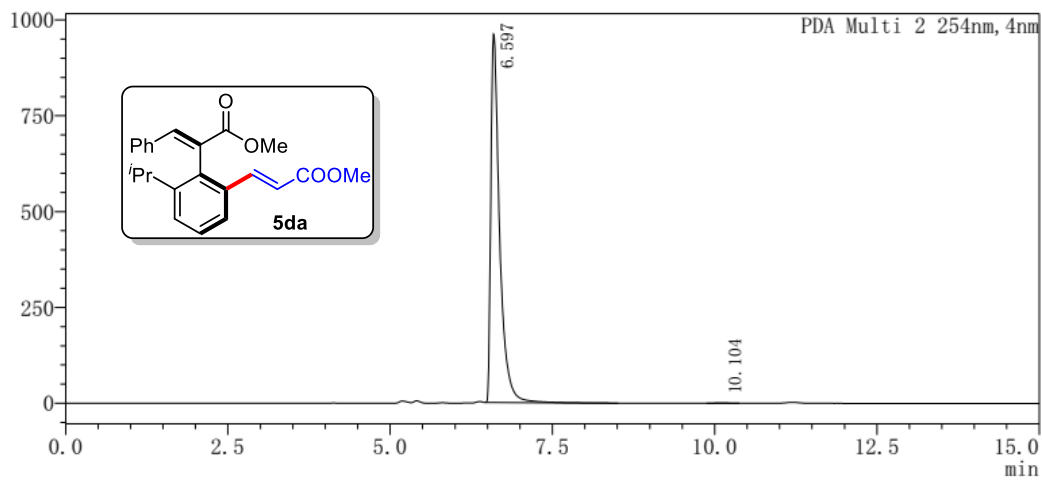

<峰表>

PDA Ch2 254nm

| 峰号 | 保留时间   | 面积      | 高度     | 面积%     |
|----|--------|---------|--------|---------|
| 1  | 6.597  | 9126999 | 960675 | 99.838  |
| 2  | 10.104 | 14809   | 1201   | 0.162   |
| 总计 |        | 9141809 | 961876 | 100.000 |

<色谱图>

mAU

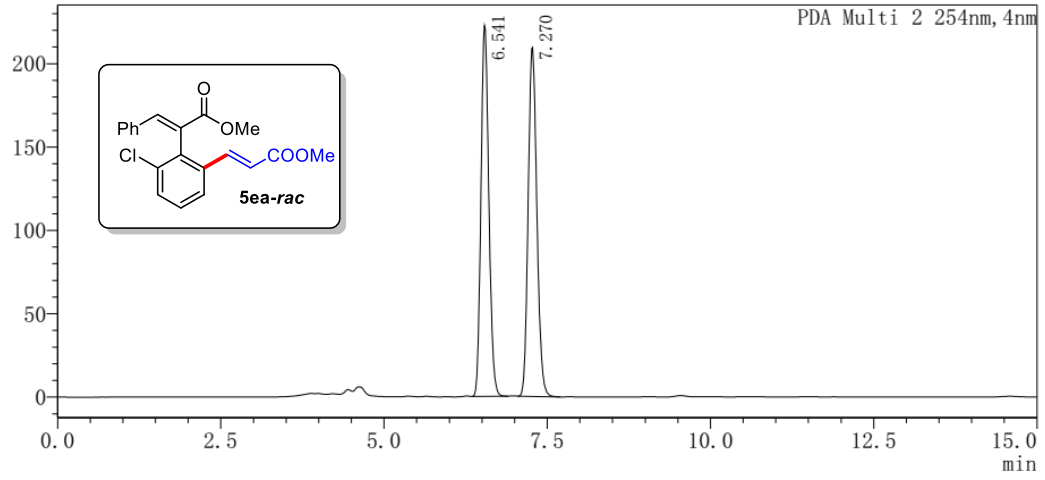

<峰表>

PDA Ch2 254nm

| 峰号 | 保留时间  | 面积      | 高度     | 面积%     |
|----|-------|---------|--------|---------|
| 1  | 6.541 | 1866943 | 222274 | 49.137  |
| 2  | 7.270 | 1932491 | 209192 | 50.863  |
| 总计 |       | 3799434 | 431466 | 100.000 |

<色谱图>

mAU

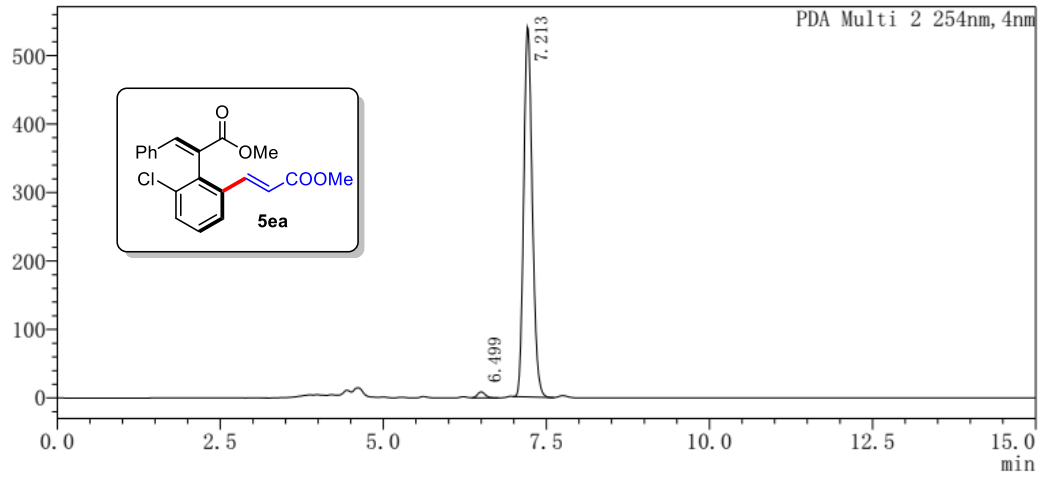

<峰表>

PDA Ch2 254nm

| 峰号 | 保留时间  | 面积      | 高度     | 面积%     |
|----|-------|---------|--------|---------|
| 1  | 6.499 | 69067   | 8570   | 1.370   |
| 2  | 7.213 | 4971105 | 539478 | 98.630  |
| 总计 |       | 5040172 | 548047 | 100.000 |



<色谱图>

mAU

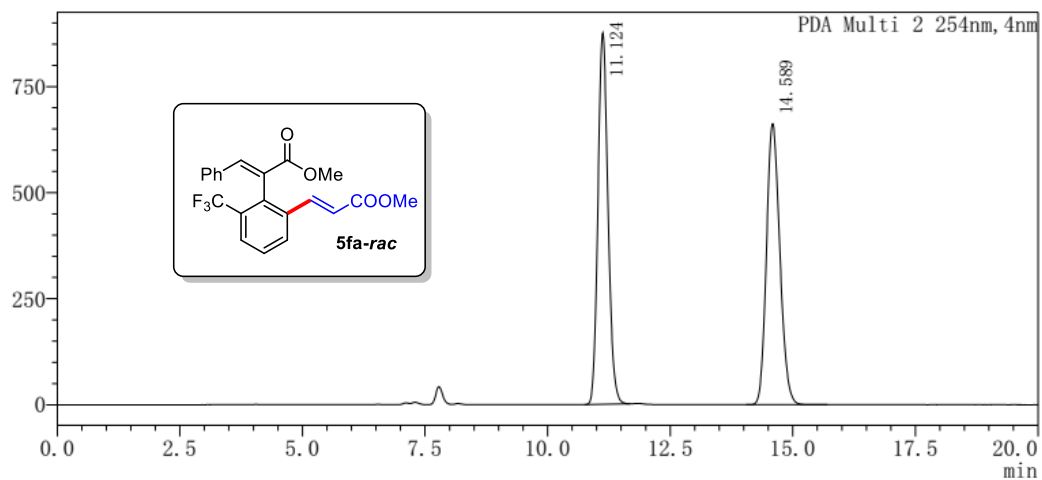

<峰表>

PDA Ch2 254nm

| 峰号 | 保留时间   | 面积       | 高度      | 面积%     |
|----|--------|----------|---------|---------|
| 1  | 11.124 | 12476486 | 874973  | 49.824  |
| 2  | 14.589 | 12564381 | 662245  | 50.176  |
| 总计 |        | 25040867 | 1537218 | 100.000 |

<色谱图>

mAU

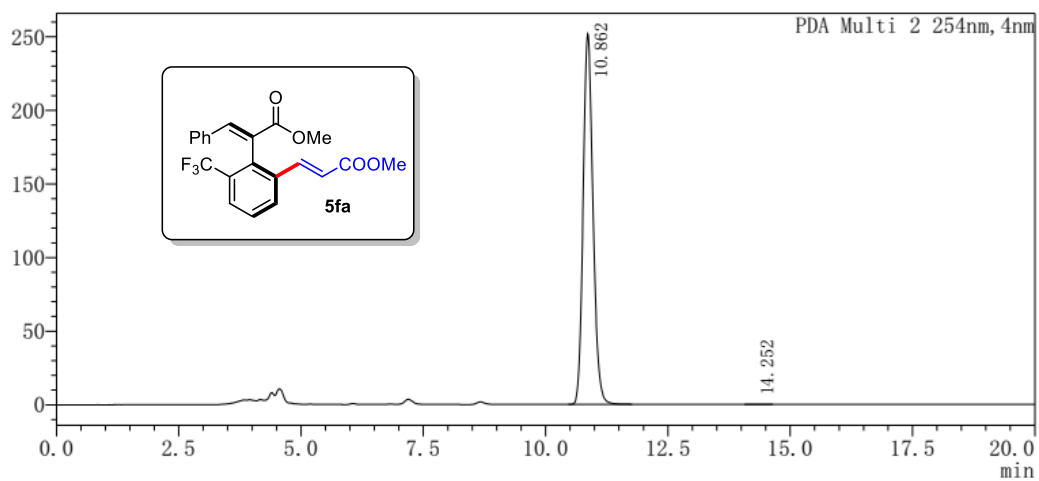

<峰表>

PDA Ch2 254nm

| 峰号 | 保留时间   | 面积      | 高度     | 面积%     |
|----|--------|---------|--------|---------|
| 1  | 10.862 | 3530464 | 251438 | 99.961  |
| 2  | 14.252 | 1370    | 89     | 0.039   |
| 总计 |        | 3531834 | 251528 | 100.000 |

<色谱图>

mAU

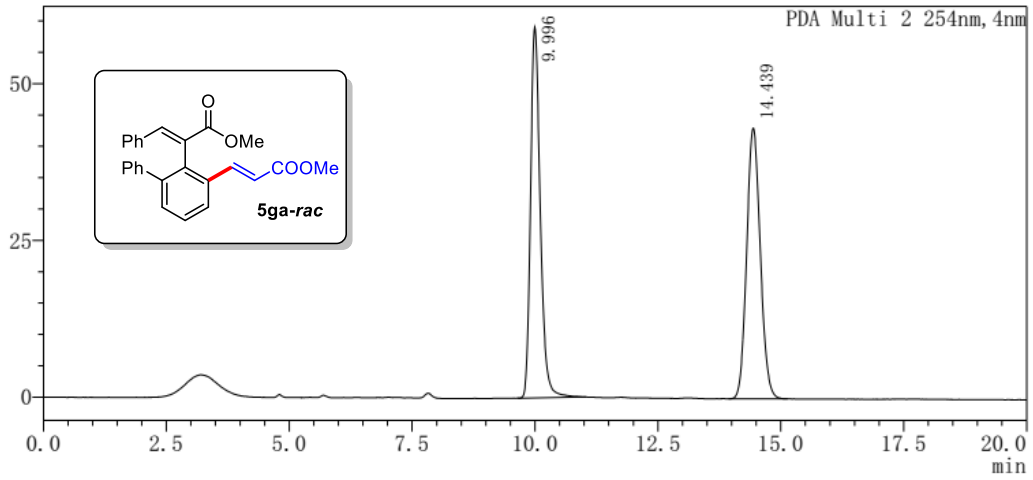

<峰表>

PDA Ch2 254nm

| 峰号 | 保留时间   | 面积      | 高度     | 面积%     |
|----|--------|---------|--------|---------|
| 1  | 9.996  | 815892  | 59110  | 49.536  |
| 2  | 14.439 | 831165  | 43165  | 50.464  |
| 总计 |        | 1647057 | 102275 | 100.000 |

<色谱图>

mAU

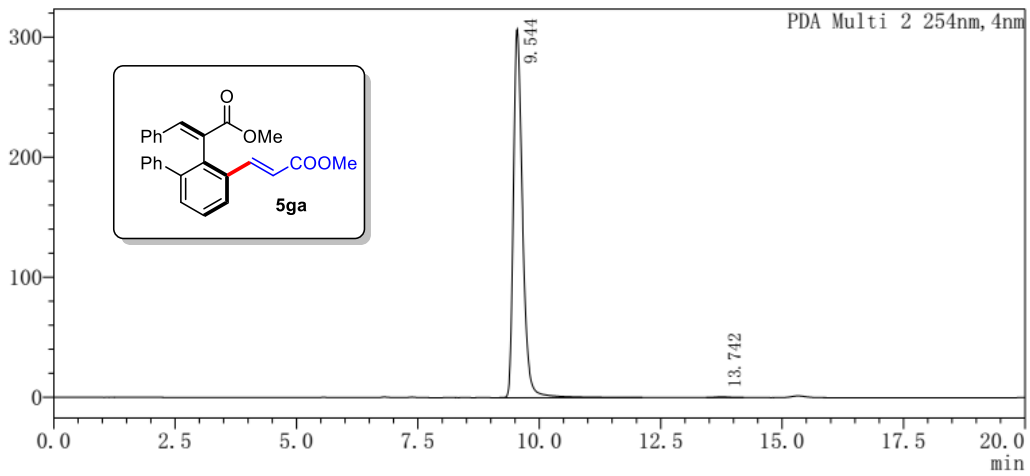

<峰表>

PDA Ch2 254nm

| 峰号 | 保留时间   | 面积      | 高度     | 面积%     |
|----|--------|---------|--------|---------|
| 1  | 9.544  | 4021664 | 306451 | 99.745  |
| 2  | 13.742 | 10264   | 570    | 0.255   |
| 总计 |        | 4031928 | 307021 | 100.000 |

<色谱图>

mAU

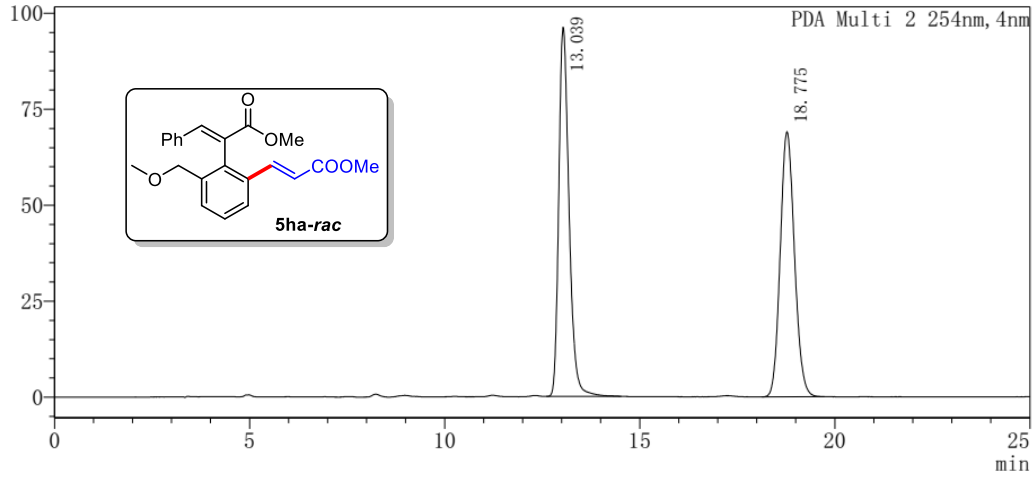

<峰表>

PDA Ch2 254nm

| 峰号 | 保留时间   | 面积      | 高度     | 面积%     |
|----|--------|---------|--------|---------|
| 1  | 13.039 | 1761153 | 96121  | 50.140  |
| 2  | 18.775 | 1751287 | 69021  | 49.860  |
| 总计 |        | 3512440 | 165142 | 100.000 |

<色谱图>

mAU

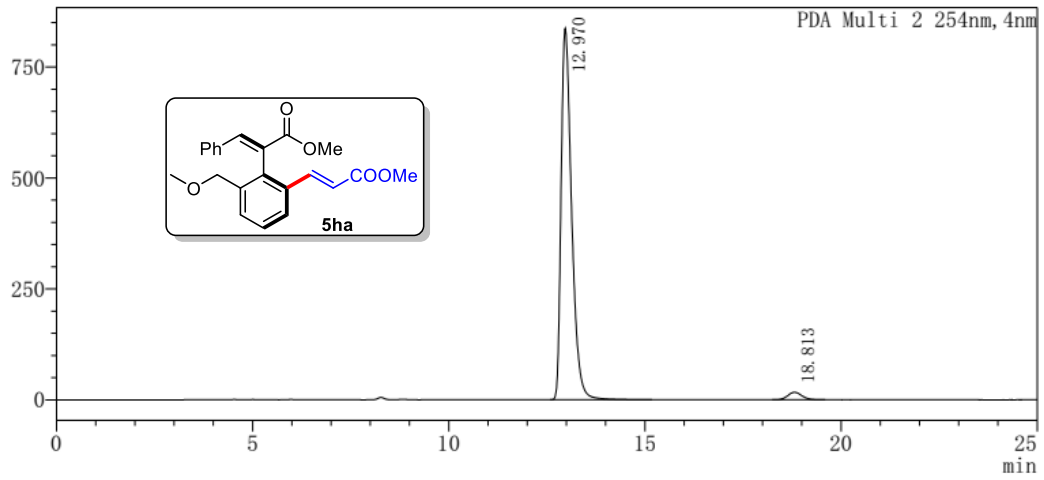

<峰表>

PDA Ch2 254nm

| 峰号 | 保留时间   | 面积       | 高度     | 面积%     |
|----|--------|----------|--------|---------|
| 1  | 12.970 | 15614085 | 836880 | 97.364  |
| 2  | 18.813 | 422654   | 16781  | 2.636   |
| 总计 |        | 16036739 | 853661 | 100.000 |

<色谱图>

mAU

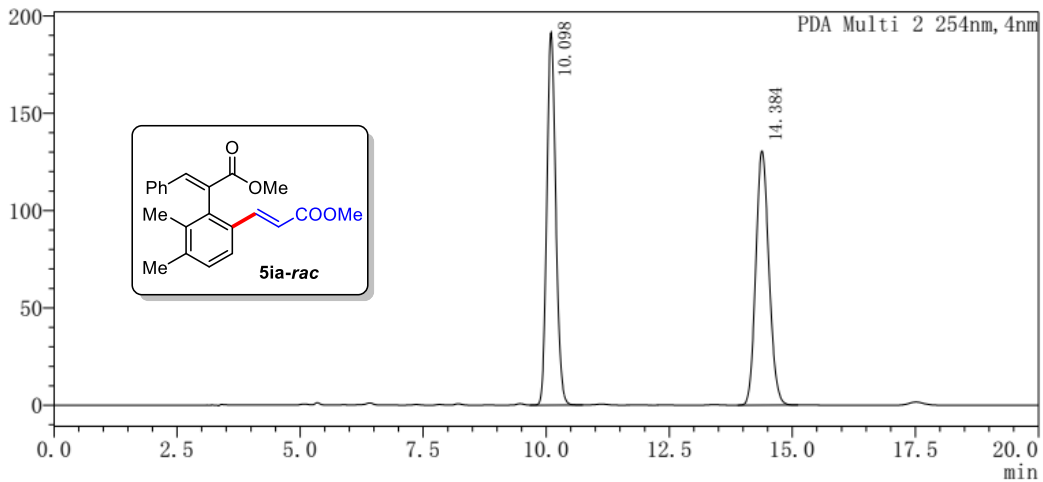

<峰表>

PDA Ch2 254nm

| 峰号 | 保留时间   | 面积      | 高度     | 面积%     |
|----|--------|---------|--------|---------|
| 1  | 10.098 | 2435288 | 191242 | 50.122  |
| 2  | 14.384 | 2423478 | 130510 | 49.878  |
| 总计 |        | 4858766 | 321753 | 100.000 |

<色谱图>

mAU

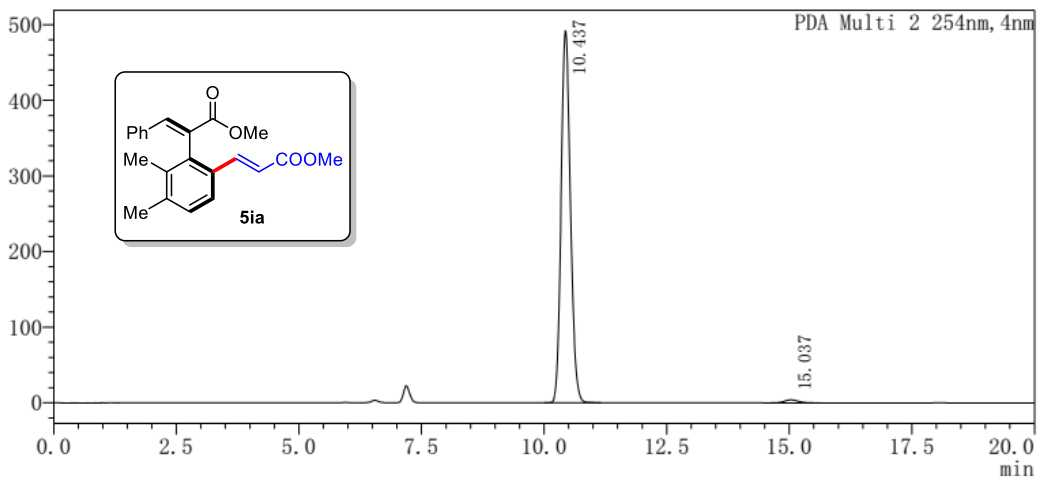

<峰表>

PDA Ch2 254nm

| 峰号 | 保留时间   | 面积      | 高度     | 面积%     |
|----|--------|---------|--------|---------|
| 1  | 10.437 | 6501104 | 491363 | 98.816  |
| 2  | 15.037 | 77903   | 4012   | 1.184   |
| 总计 |        | 6579007 | 495376 | 100.000 |

<色谱图>

mAU

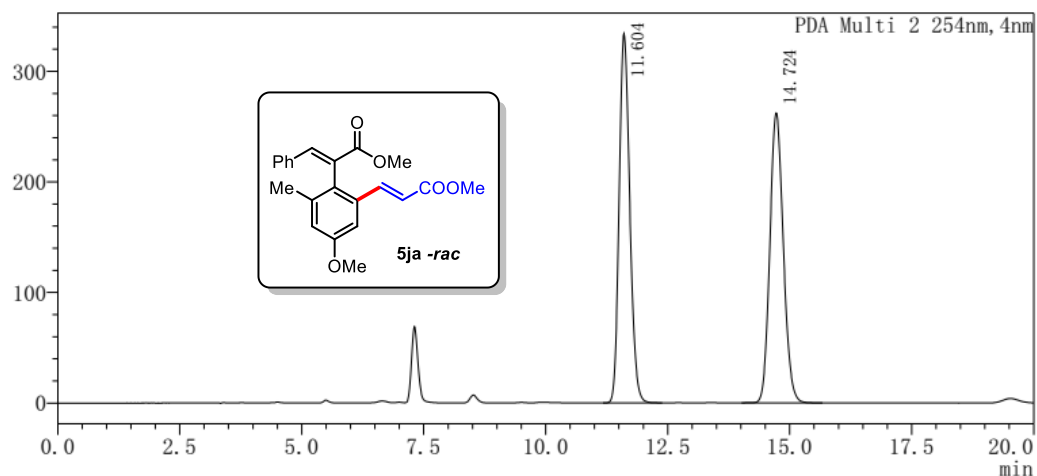

<峰表>

PDA Ch2 254nm

| 峰号 | 保留时间   | 面积       | 高度     | 面积%     |
|----|--------|----------|--------|---------|
| 1  | 11.604 | 5053246  | 333798 | 50.055  |
| 2  | 14.724 | 5042187  | 262093 | 49.945  |
| 总计 |        | 10095433 | 595890 | 100.000 |

<色谱图>

mAU

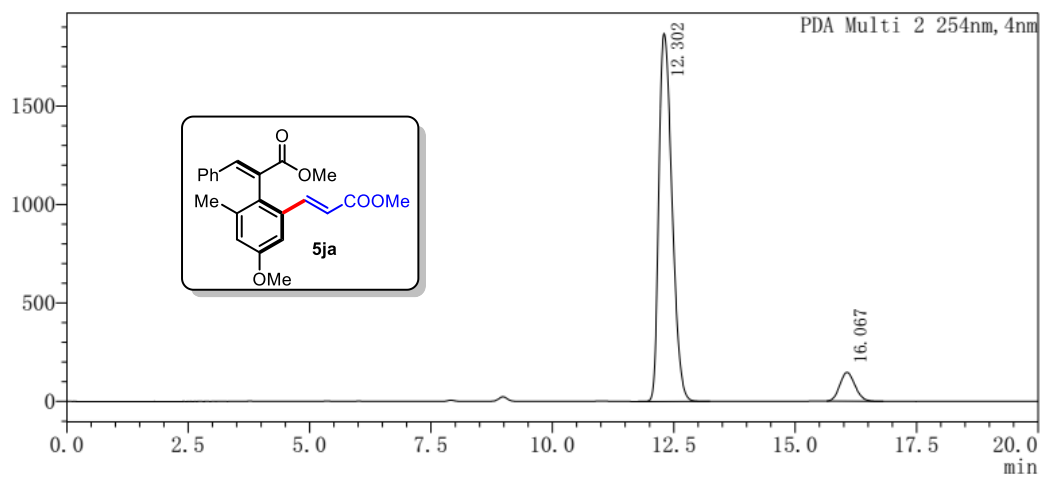

<峰表>

PDA Ch2 254nm

| 峰号 | 保留时间   | 面积       | 高度      | 面积%     |
|----|--------|----------|---------|---------|
| 1  | 12.302 | 35291205 | 1866952 | 91.669  |
| 2  | 16.067 | 3207384  | 146448  | 8.331   |
| 总计 |        | 38498589 | 2013400 | 100.000 |

<色谱图>

mAU

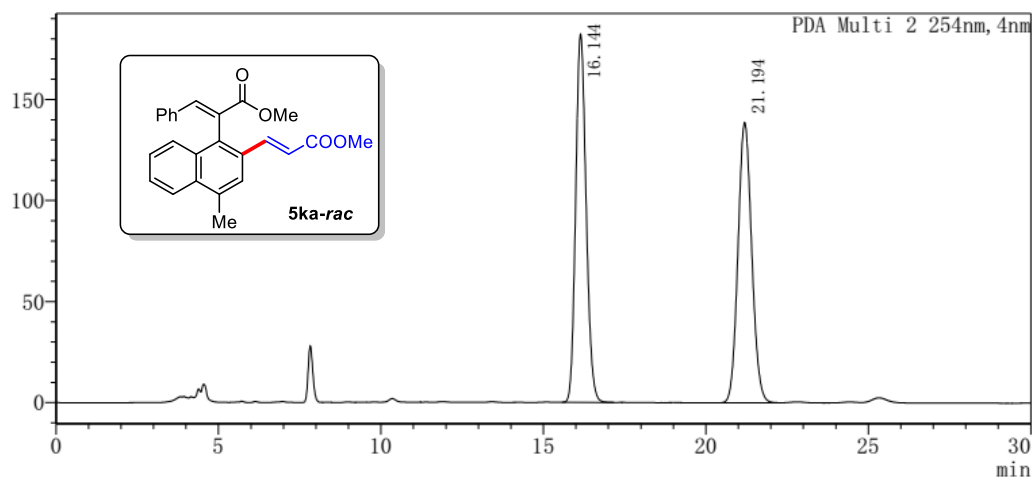

<峰表>

PDA Ch2 254nm

| 峰号 | 保留时间   | 面积      | 高度     | 面积%     |
|----|--------|---------|--------|---------|
| 1  | 16.144 | 4075576 | 182156 | 49.994  |
| 2  | 21.194 | 4076620 | 138593 | 50.006  |
| 总计 |        | 8152196 | 320749 | 100.000 |

<色谱图>

mAU

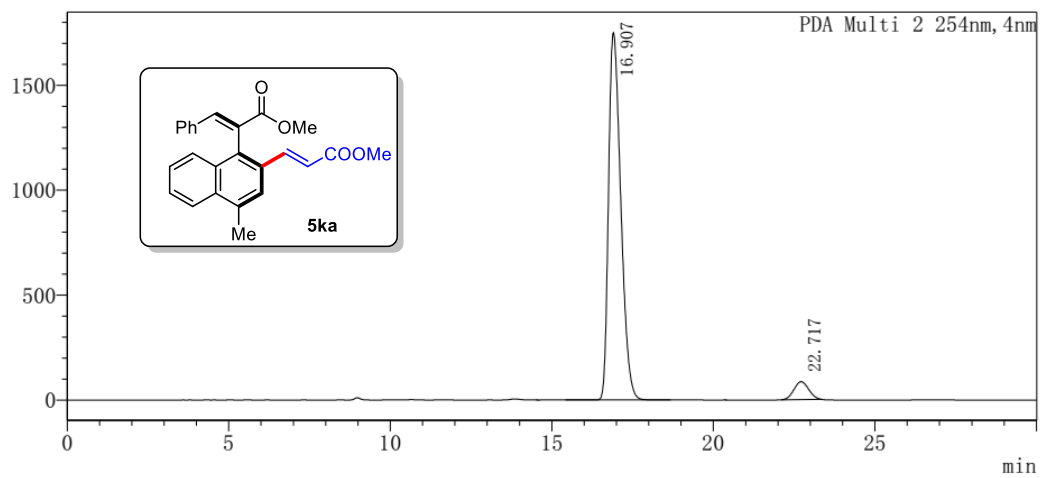

<峰表>

PDA Ch2 254nm

| 峰号 | 保留时间   | 面积       | 高度      | 面积%     |
|----|--------|----------|---------|---------|
| 1  | 16.907 | 46172461 | 1750419 | 94.455  |
| 2  | 22.717 | 2710425  | 85457   | 5.545   |
| 总计 |        | 48882887 | 1835876 | 100.000 |

<色谱图>

mAU

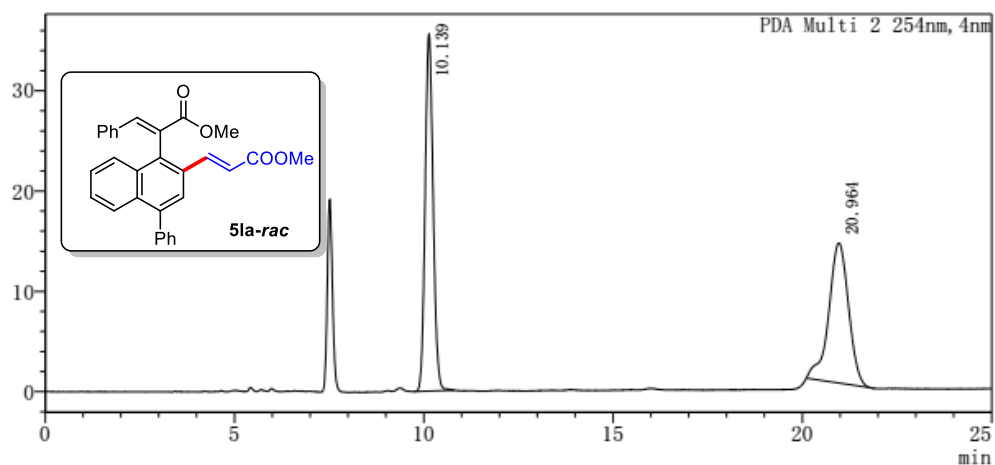

<峰表>

PDA Ch2 254nm

| 峰号 | 保留时间   | 面积      | 高度    | 面积%     |
|----|--------|---------|-------|---------|
| 1  | 10.139 | 522214  | 35598 | 50.723  |
| 2  | 20.964 | 507319  | 13955 | 49.277  |
| 总计 |        | 1029534 | 49553 | 100.000 |

<色谱图>

mAU

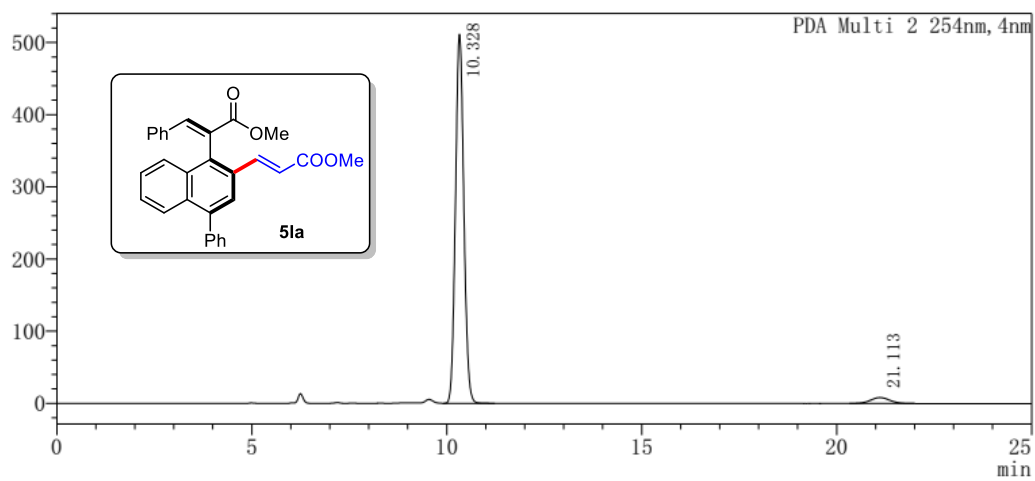

<峰表>

PDA Ch2 254nm

| 峰号 | 保留时间   | 面积      | 高度     | 面积%     |
|----|--------|---------|--------|---------|
| 1  | 10.328 | 7623388 | 511602 | 96.422  |
| 2  | 21.113 | 282886  | 8184   | 3.578   |
| 总计 |        | 7906273 | 519786 | 100.000 |

<色谱图>

mAU

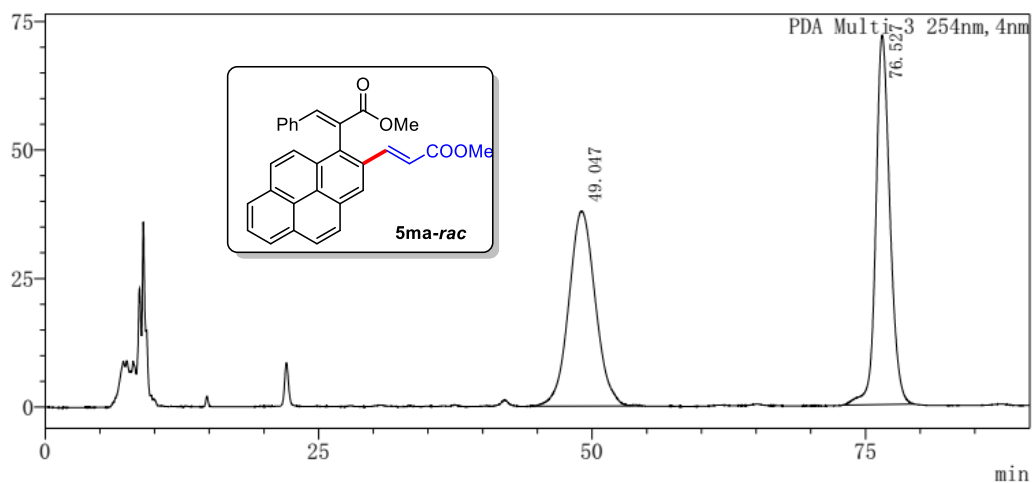

<峰表>

PDA Ch3 254nm

| 峰号 | 保留时间   | 面积       | 高度     | 面积%     |
|----|--------|----------|--------|---------|
| 1  | 49.047 | 6408715  | 37929  | 49.825  |
| 2  | 76.527 | 6453837  | 71905  | 50.175  |
| 总计 |        | 12862552 | 109834 | 100.000 |

<色谱图>

mAU

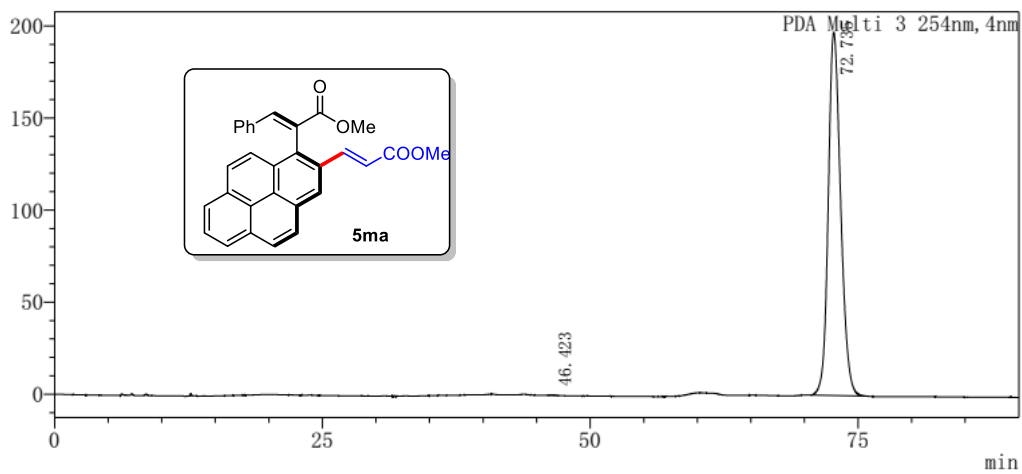

<峰表>

PDA Ch3 254nm

| 峰号 | 保留时间   | 面积       | 高度     | 面积%     |
|----|--------|----------|--------|---------|
| 1  | 46.423 | 9556     | 273    | 0.060   |
| 2  | 72.735 | 15868869 | 197324 | 99.940  |
| 总计 |        | 15878425 | 197598 | 100.000 |



<色谱图>

mAU

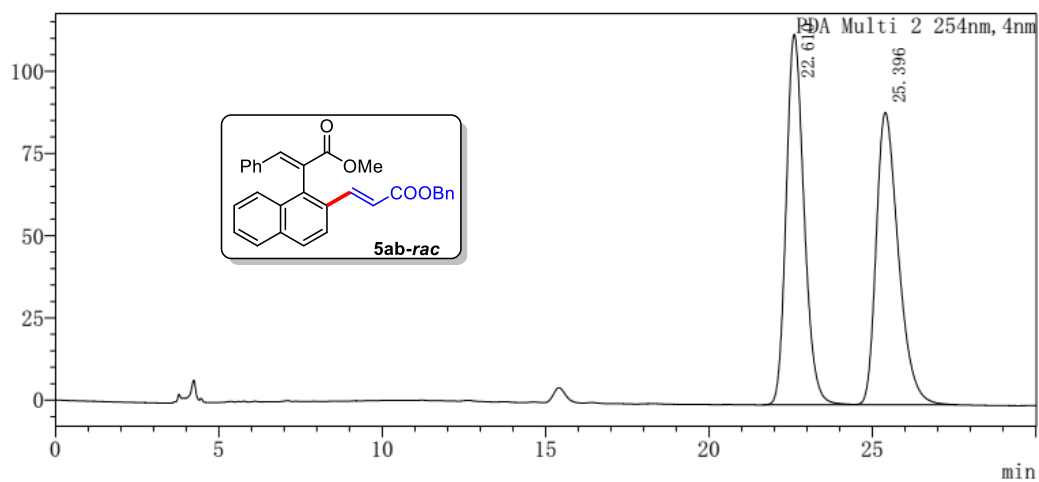

<峰表>

PDA Ch2 254nm

| 峰号 | 保留时间   | 面积      | 高度     | 面积%     |
|----|--------|---------|--------|---------|
| 1  | 22.610 | 4282279 | 112629 | 50.419  |
| 2  | 25.396 | 4211174 | 88871  | 49.581  |
| 总计 |        | 8493453 | 201500 | 100.000 |

<色谱图>

mAU

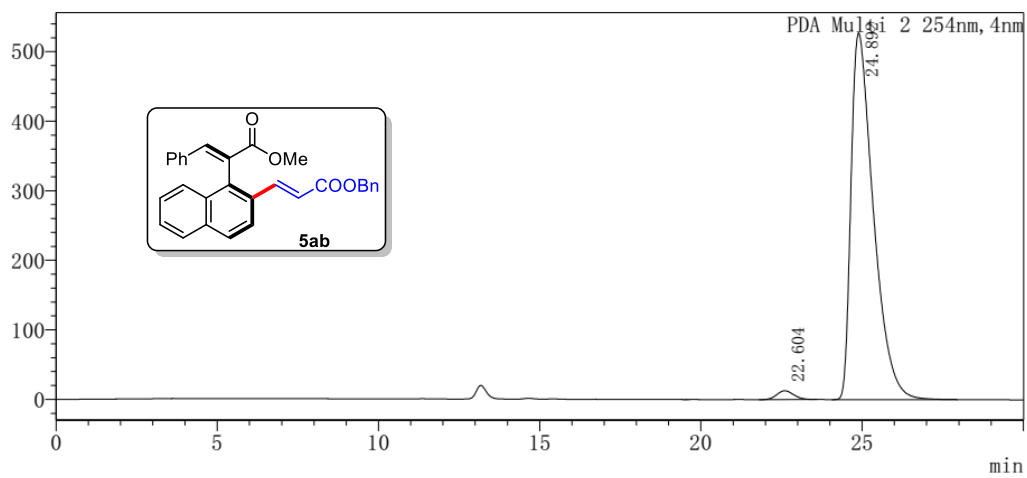

<峰表>

PDA Ch2 254nm

| 峰号 | 保留时间   | 面积       | 高度     | 面积%     |
|----|--------|----------|--------|---------|
| 1  | 22.604 | 467051   | 12707  | 1.801   |
| 2  | 24.892 | 25462416 | 526964 | 98.199  |
| 总计 |        | 25929467 | 539671 | 100.000 |

<色谱图>

mAU

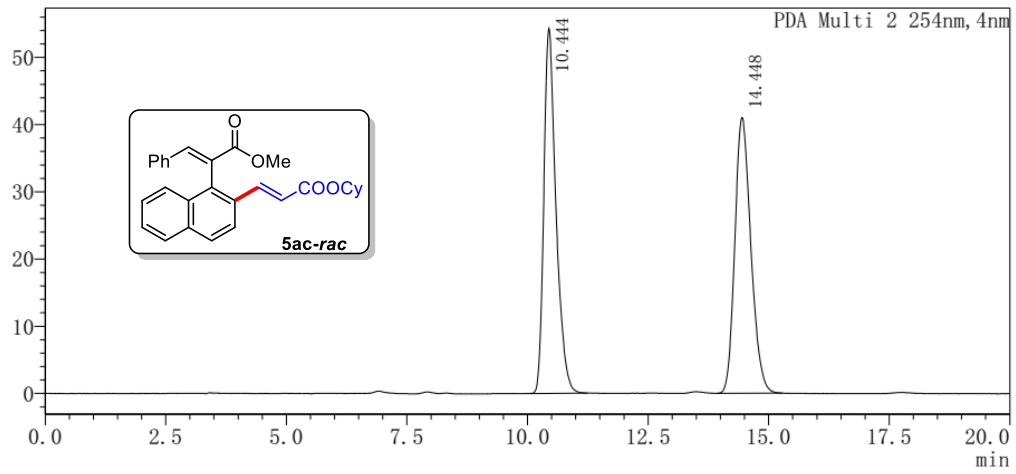

<峰表>

PDA Ch2 254nm

| 峰号 | 保留时间   | 面积      | 高度    | 面积%     |
|----|--------|---------|-------|---------|
| 1  | 10.444 | 951180  | 54289 | 50.028  |
| 2  | 14.448 | 950130  | 41012 | 49.972  |
| 总计 |        | 1901310 | 95301 | 100.000 |

<色谱图>

mAU

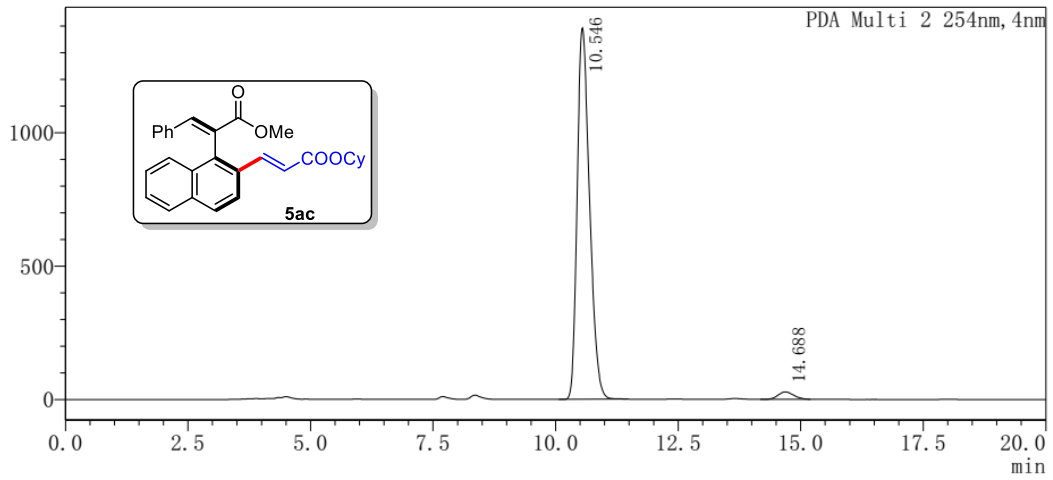

<峰表>

PDA Ch2 254nm

| 峰号 | 保留时间   | 面积       | 高度      | 面积%     |
|----|--------|----------|---------|---------|
| 1  | 10.546 | 24449220 | 1391552 | 97.511  |
| 2  | 14.688 | 624071   | 27822   | 2.489   |
| 总计 |        | 25073291 | 1419374 | 100.000 |

<色谱图>

mAU

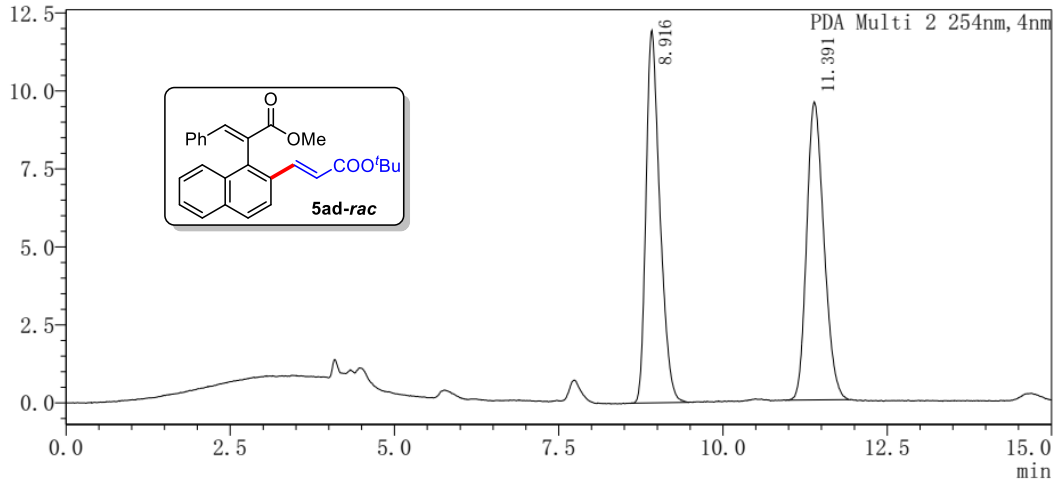

<峰表>

PDA Ch2 254nm

| 峰号 | 保留时间   | 面积     | 高度    | 面积%     |
|----|--------|--------|-------|---------|
| 1  | 8.916  | 175802 | 11937 | 50.151  |
| 2  | 11.391 | 174745 | 9549  | 49.849  |
| 总计 |        | 350548 | 21486 | 100.000 |

<色谱图>

mAU

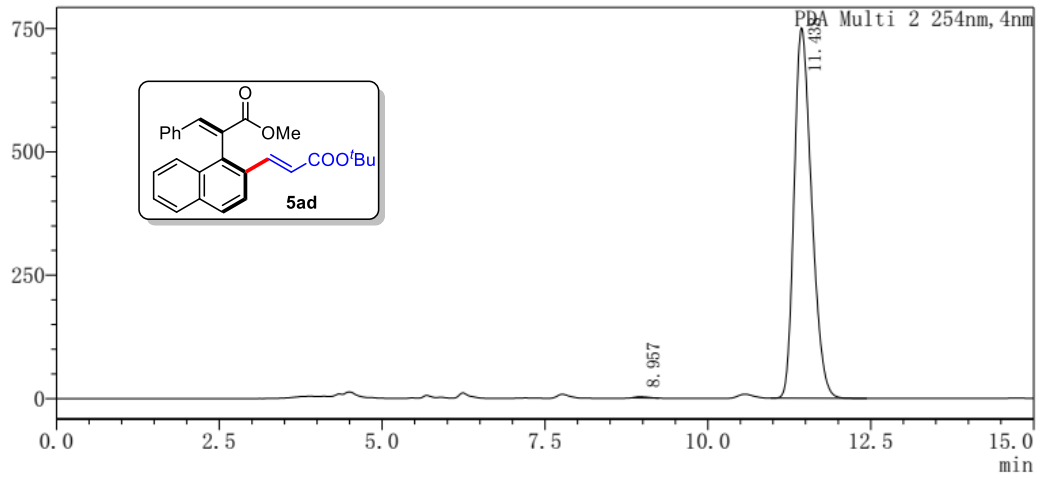

<峰表>

PDA Ch2 254nm

| 峰号 | 保留时间   | 面积       | 高度     | 面积%     |
|----|--------|----------|--------|---------|
| 1  | 8.957  | 34085    | 2502   | 0.243   |
| 2  | 11.438 | 14005339 | 750058 | 99.757  |
| 总计 |        | 14039425 | 752560 | 100.000 |

<色谱图>

mAU

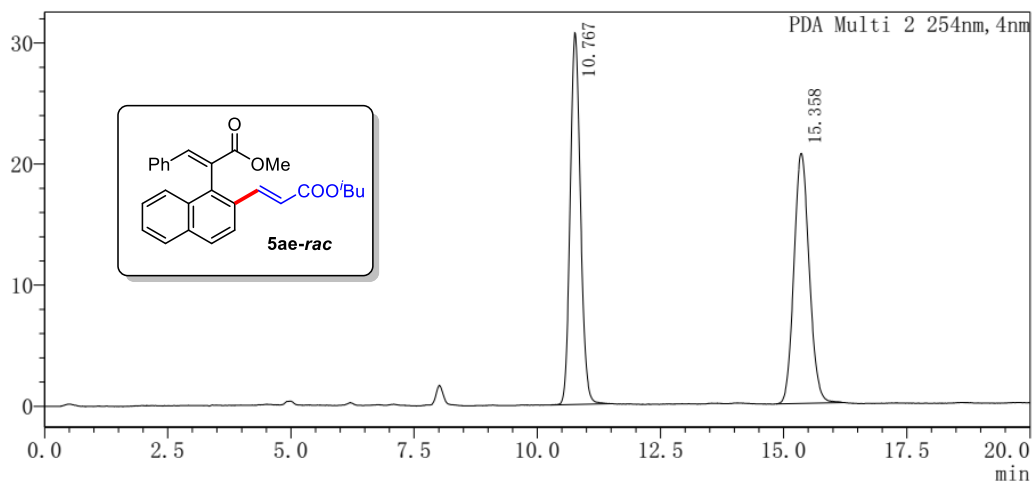

<峰表>

PDA Ch2 254nm

| 峰号 | 保留时间   | 面积     | 高度    | 面积%     |
|----|--------|--------|-------|---------|
| 1  | 10.767 | 446545 | 30680 | 50.007  |
| 2  | 15.358 | 446423 | 20659 | 49.993  |
| 总计 |        | 892968 | 51339 | 100.000 |

<色谱图>

mAU

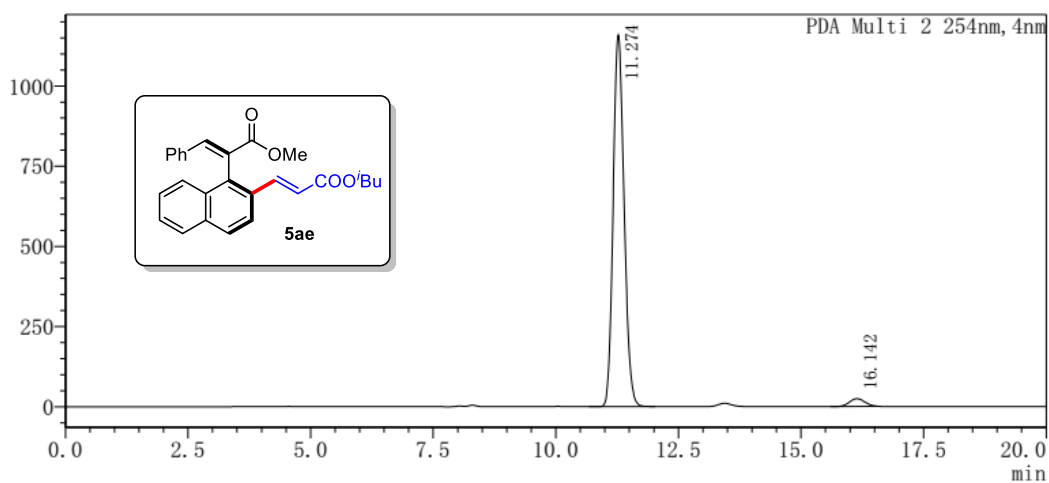

<峰表>

PDA Ch2 254nm

| 峰号 | 保留时间   | 面积       | 高度      | 浓度    | 面积%     |
|----|--------|----------|---------|-------|---------|
| 1  | 11.274 | 17987540 | 1157743 | 0.000 | 97.064  |
| 2  | 16.142 | 544161   | 24360   | 0.000 | 2.936   |
| 总计 |        | 18531702 | 1182102 |       | 100.000 |

<色谱图>

mAU

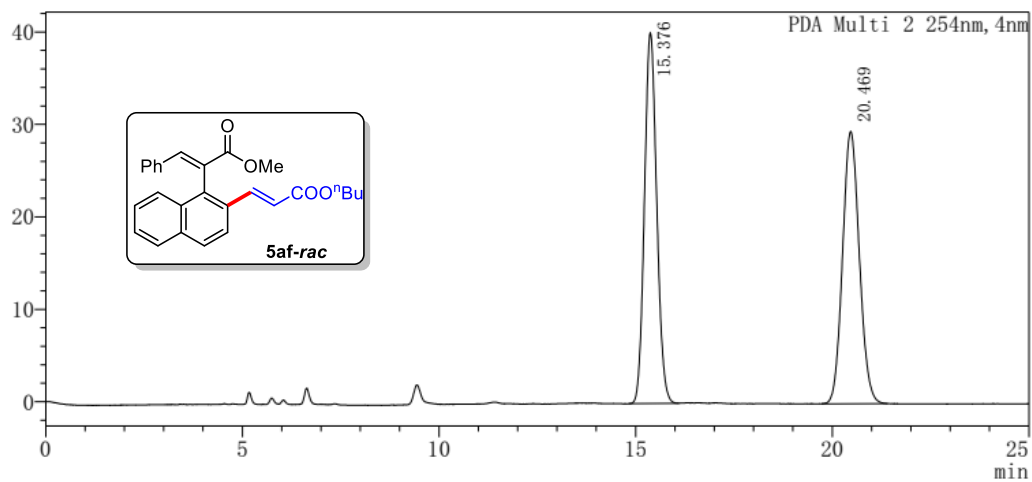

<峰表>

PDA Ch2 254nm

| 峰号 | 保留时间   | 面积      | 高度    | 浓度    | 面积%     |
|----|--------|---------|-------|-------|---------|
| 1  | 15.376 | 868911  | 40079 | 0.000 | 49.912  |
| 2  | 20.469 | 871958  | 29441 | 0.000 | 50.088  |
| 总计 |        | 1740869 | 69519 |       | 100.000 |

<色谱图>

mAU

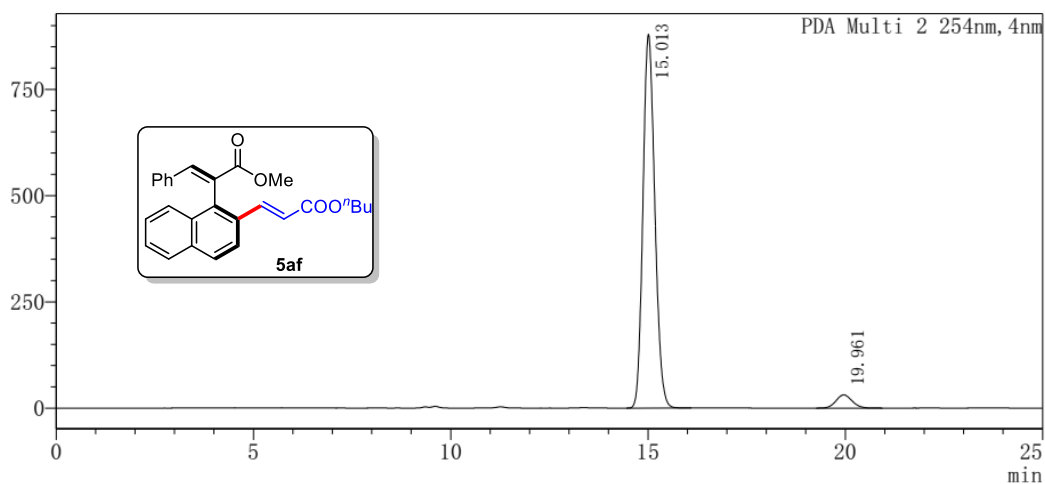

<峰表>

PDA Ch2 254nm

| 峰号 | 保留时间   | 面积       | 高度     | 面积%     |
|----|--------|----------|--------|---------|
| 1  | 15.013 | 18393501 | 878911 | 95.410  |
| 2  | 19.961 | 884959   | 31101  | 4.590   |
| 总计 |        | 19278460 | 910012 | 100.000 |

<色谱图>

mAU

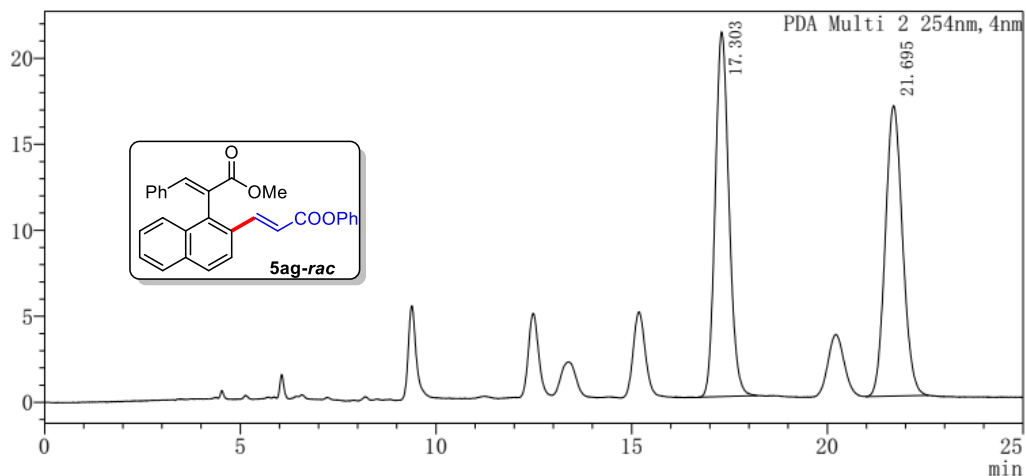

<峰表>

PDA Ch2 254nm

| 峰号 | 保留时间   | 面积      | 高度    | 面积%     |
|----|--------|---------|-------|---------|
| 1  | 17.303 | 519765  | 21189 | 50.097  |
| 2  | 21.695 | 517748  | 16876 | 49.903  |
| 总计 |        | 1037513 | 38065 | 100.000 |

<色谱图>

mAU

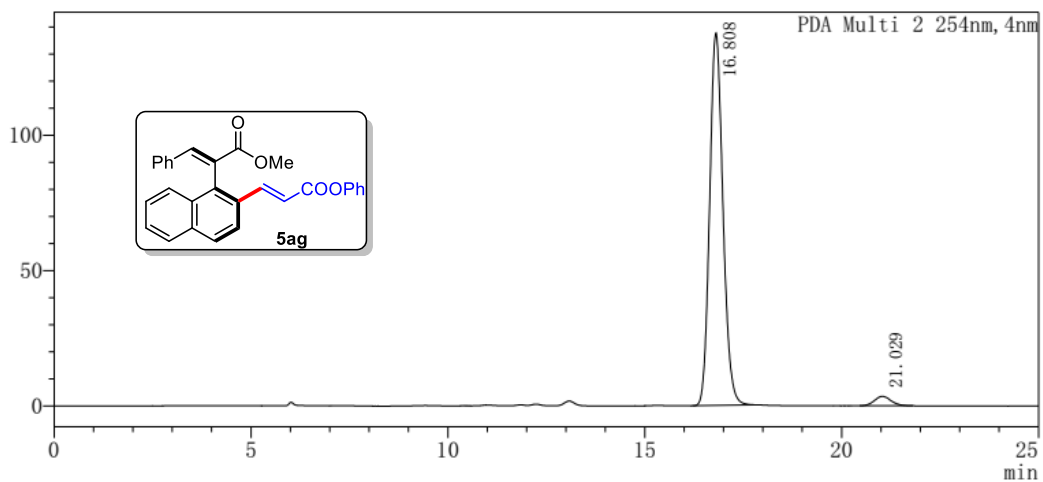

<峰表>

PDA Ch2 254nm

| 峰号 | 保留时间   | 面积      | 高度     | 面积%     |
|----|--------|---------|--------|---------|
| 1  | 16.808 | 3228882 | 137542 | 96.936  |
| 2  | 21.029 | 102063  | 3481   | 3.064   |
| 总计 |        | 3330946 | 141023 | 100.000 |

<色谱图>

mAU

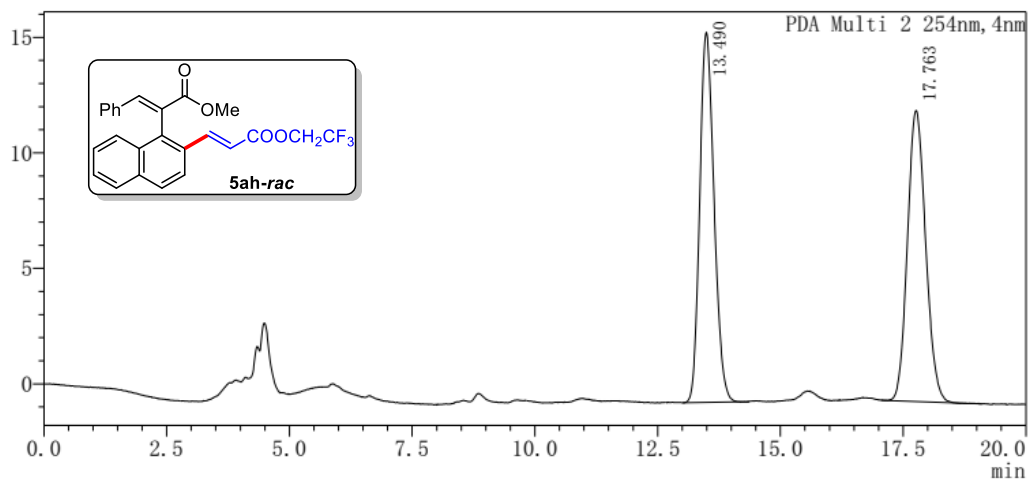

<峰表>

PDA Ch2 254nm

| 峰号 | 保留时间   | 面积     | 高度    | 浓度    | 面积%     |
|----|--------|--------|-------|-------|---------|
| 1  | 13.490 | 325278 | 16007 | 0.000 | 50.024  |
| 2  | 17.763 | 324968 | 12597 | 0.000 | 49.976  |
| 总计 |        | 650246 | 28604 |       | 100.000 |

<色谱图>

mAU

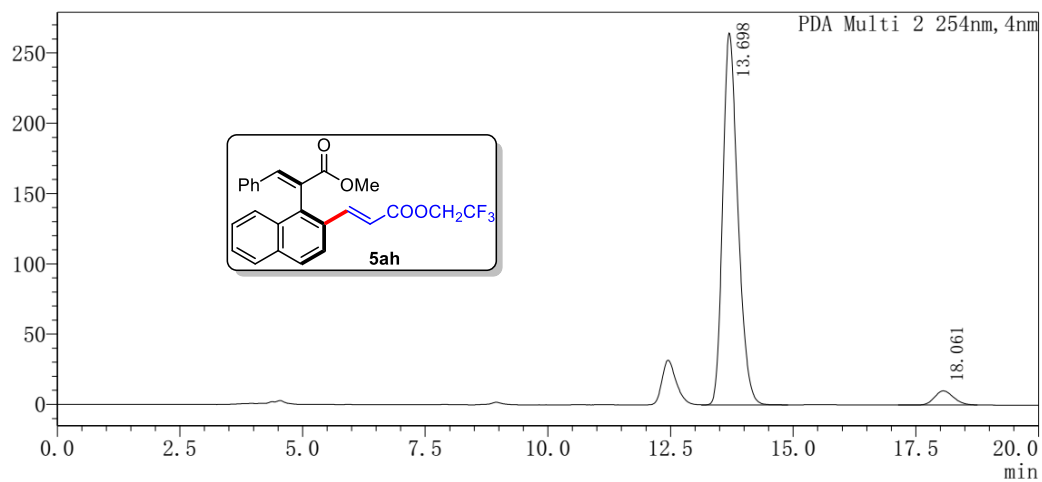

<峰表>

PDA Ch2 254nm

| 峰号 | 保留时间   | 面积      | 高度     | 面积%     |
|----|--------|---------|--------|---------|
| 1  | 13.698 | 5692126 | 264474 | 95.474  |
| 2  | 18.061 | 269818  | 10055  | 4.526   |
| 总计 |        | 5961944 | 274529 | 100.000 |

<色谱图>

mAU

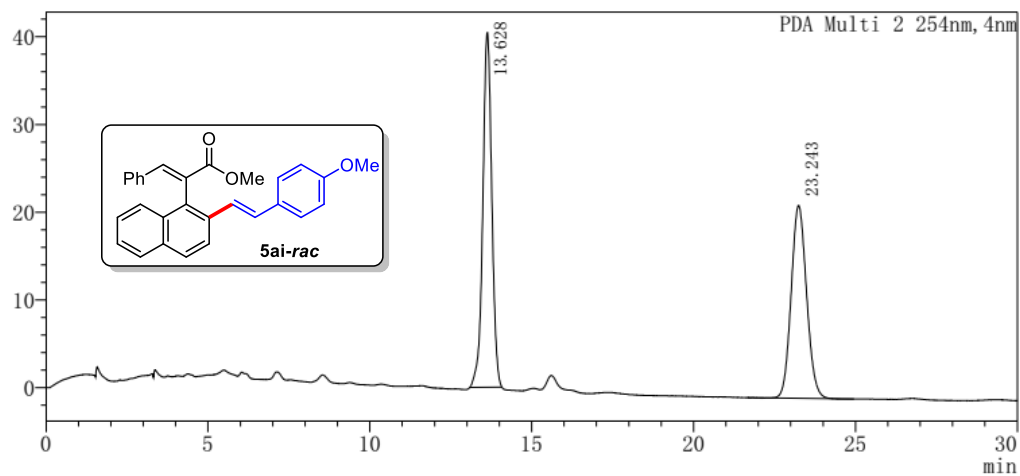

<峰表>

PDA Ch2 254nm

| 峰号 | 保留时间   | 面积      | 高度    | 面积%     |
|----|--------|---------|-------|---------|
| 1  | 13.628 | 780133  | 40409 | 51.744  |
| 2  | 23.243 | 727537  | 21981 | 48.256  |
| 总计 |        | 1507670 | 62390 | 100.000 |

<色谱图>

mAU

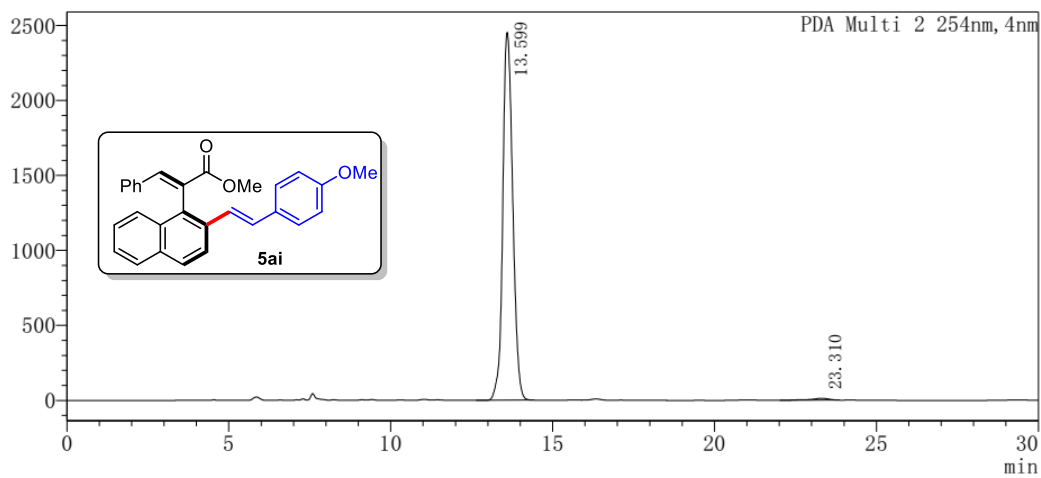

<峰表>

PDA Ch2 254nm

| 峰号 | 保留时间   | 面积       | 高度      | 面积%     |
|----|--------|----------|---------|---------|
| 1  | 13.599 | 52522725 | 2451410 | 99.037  |
| 2  | 23.310 | 510764   | 12706   | 0.963   |
| 总计 |        | 53033490 | 2464116 | 100.000 |



<色谱图>

mAU

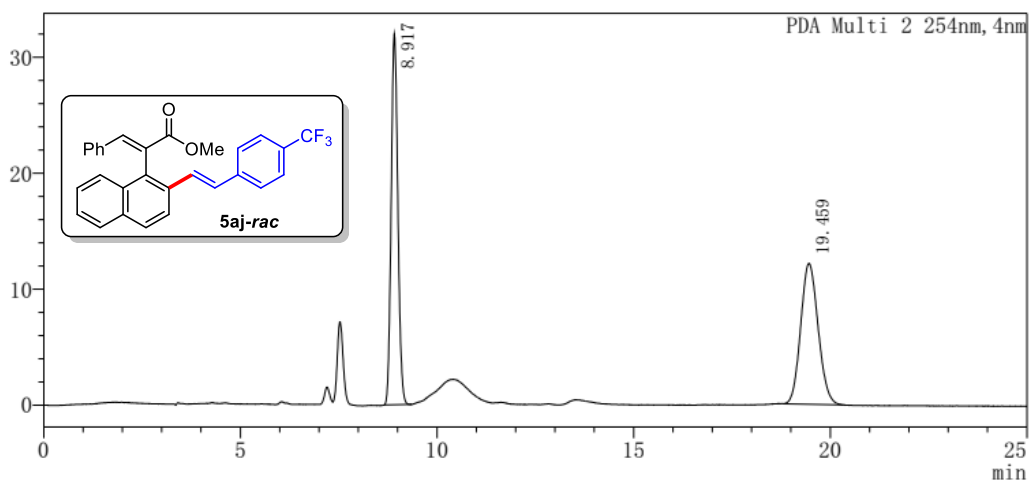

<峰表>

PDA Ch2 254nm

| 峰号 | 保留时间   | 面积     | 高度    | 面积%     |
|----|--------|--------|-------|---------|
| 1  | 8.917  | 377247 | 31941 | 50.198  |
| 2  | 19.459 | 374264 | 12141 | 49.802  |
| 总计 |        | 751511 | 44082 | 100.000 |

<色谱图>

mAU

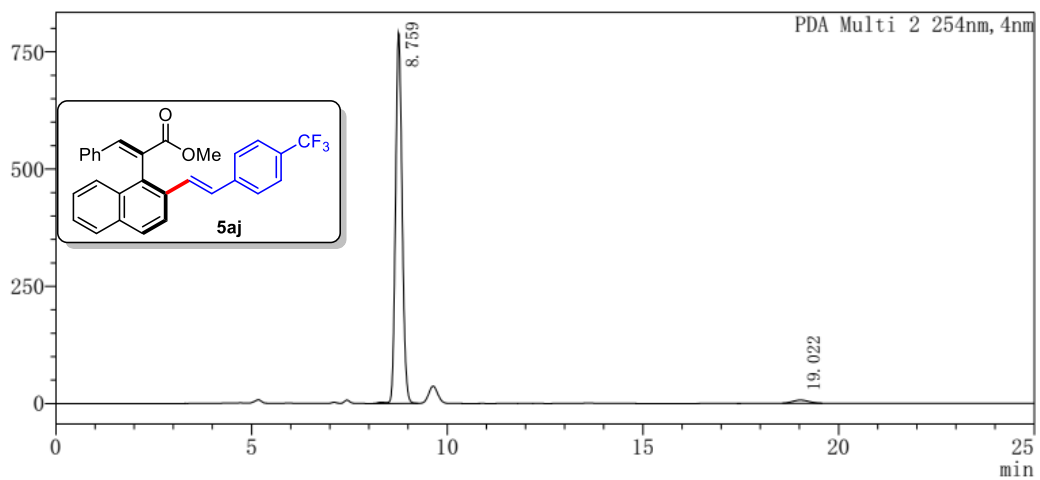

<峰表>

PDA Ch2 254nm

| 峰号 | 保留时间   | 面积      | 高度     | 浓度    | 面积%     |
|----|--------|---------|--------|-------|---------|
| 1  | 8.759  | 9272216 | 789779 | 0.000 | 97.972  |
| 2  | 19.022 | 191951  | 6728   | 0.000 | 2.028   |
| 总计 |        | 9464167 | 796508 |       | 100.000 |

<色谱图>

mAU

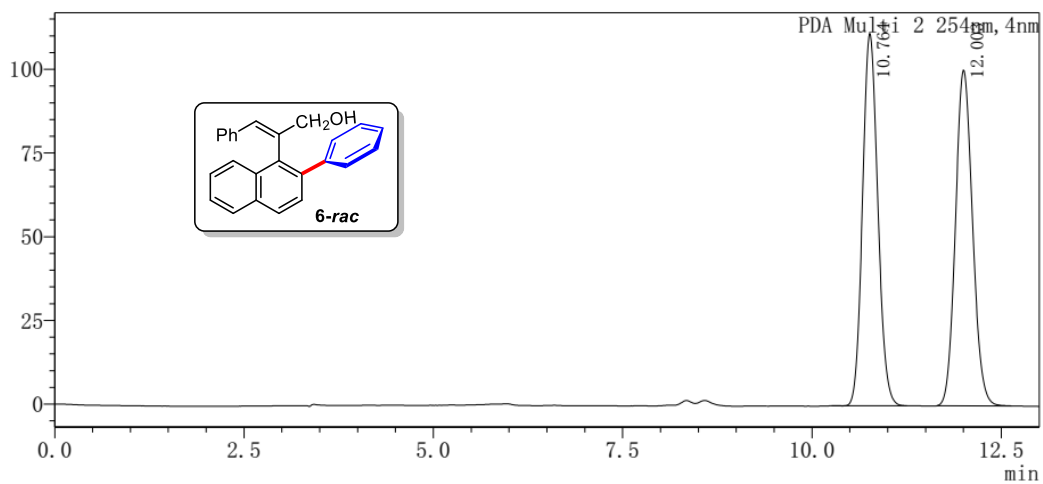

<峰表>

PDA Ch2 254nm

| 峰号 | 保留时间   | 面积      | 高度     | 面积%     |
|----|--------|---------|--------|---------|
| 1  | 10.764 | 1553521 | 111163 | 49.662  |
| 2  | 12.003 | 1574670 | 100275 | 50.338  |
| 总计 |        | 3128190 | 211438 | 100.000 |

<色谱图>

mAU

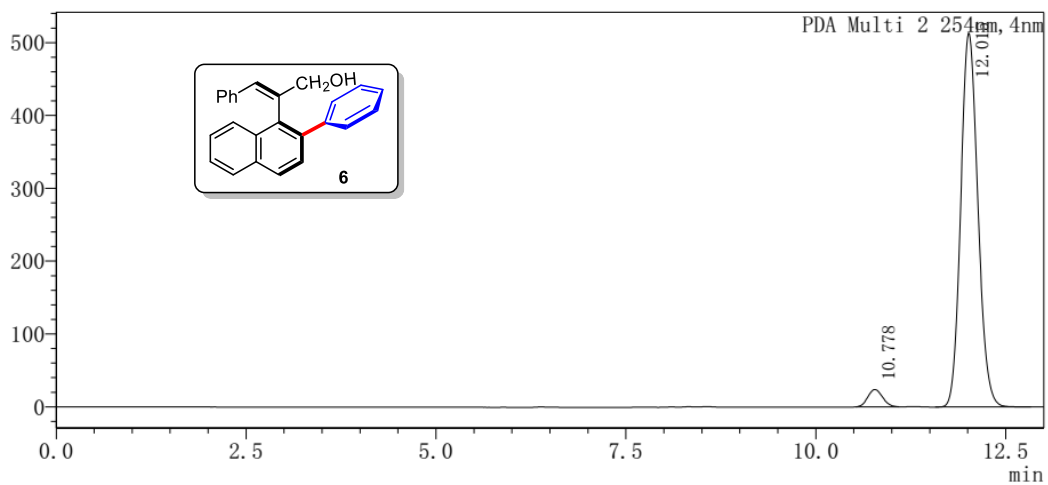

<峰表>

PDA Ch2 254nm

| 峰号 | 保留时间   | 面积      | 高度     | 面积%     |
|----|--------|---------|--------|---------|
| 1  | 10.778 | 321711  | 23807  | 3.848   |
| 2  | 12.015 | 8038592 | 513064 | 96.152  |
| 总计 |        | 8360303 | 536871 | 100.000 |

<色谱图>

mAU

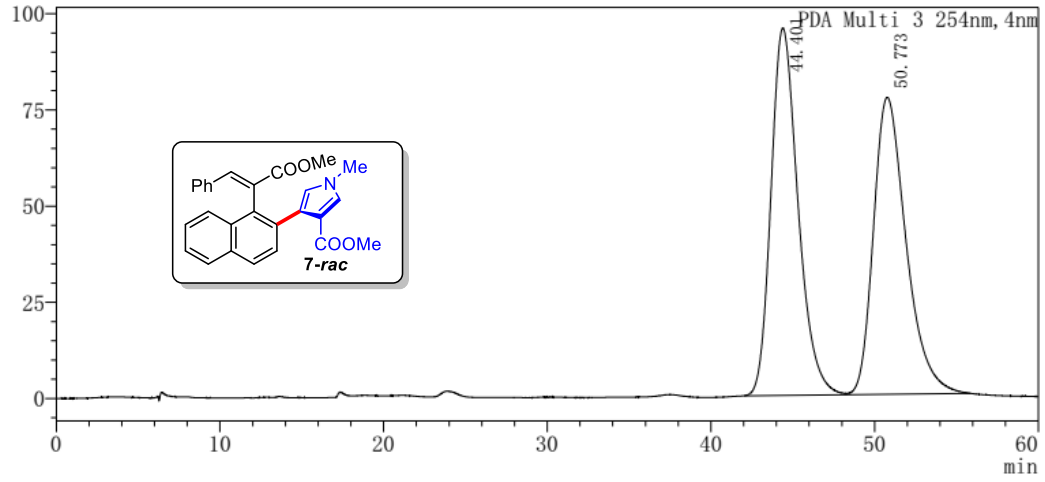

<峰表>

PDA Ch3 254nm

| 峰号 | 保留时间   | 面积       | 高度     | 面积%     |
|----|--------|----------|--------|---------|
| 1  | 44.401 | 10969186 | 95411  | 50.653  |
| 2  | 50.773 | 10686512 | 77178  | 49.347  |
| 总计 |        | 21655698 | 172589 | 100.000 |

<色谱图>

mAU

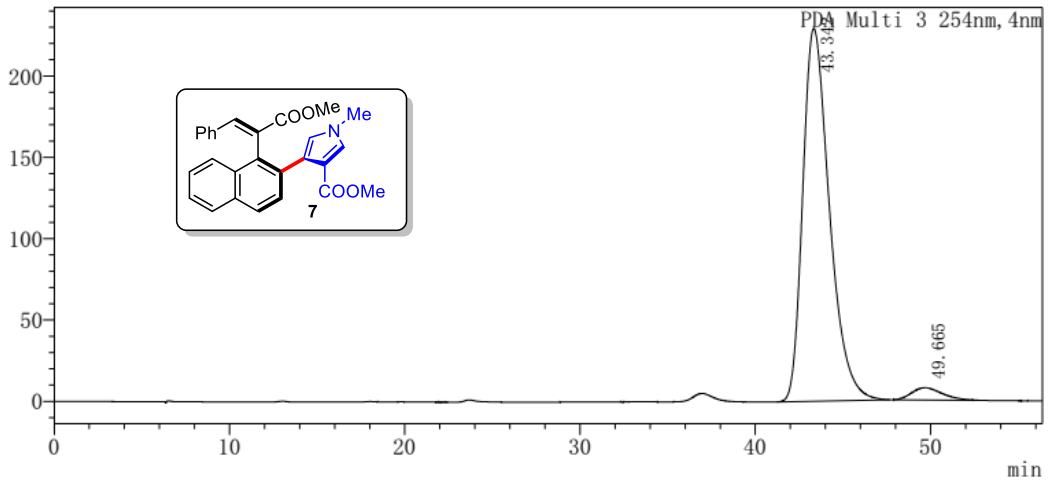

<峰表>

PDA Ch3 254nm

| 峰号 | 保留时间   | 面积       | 高度     | 面积%     |
|----|--------|----------|--------|---------|
| 1  | 43.342 | 24226859 | 229131 | 96.428  |
| 2  | 49.665 | 897398   | 7461   | 3.572   |
| 总计 |        | 25124257 | 236592 | 100.000 |

<色谱图>

mAU

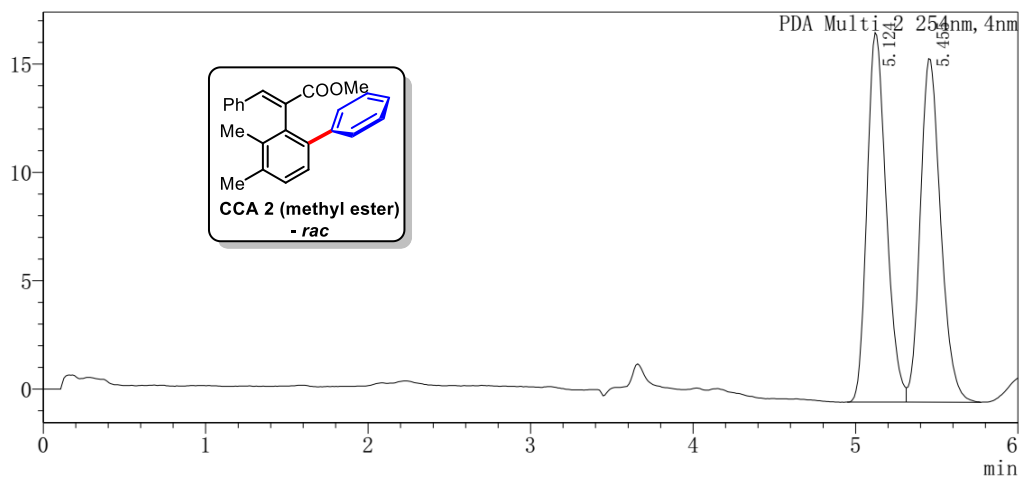

<峰表>

PDA Ch2 254nm

| 峰号 | 保留时间  | 面积     | 高度    | 浓度    | 面积%     |
|----|-------|--------|-------|-------|---------|
| 1  | 5.124 | 140682 | 17045 | 0.000 | 50.368  |
| 2  | 5.455 | 138628 | 15855 | 0.000 | 49.632  |
| 总计 |       | 279310 | 32900 |       | 100.000 |

<色谱图>

mAU

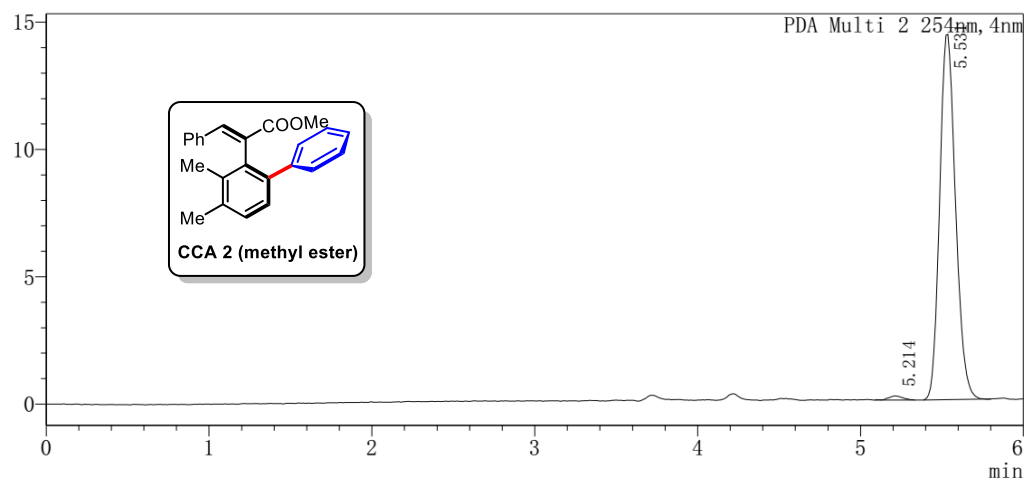

<峰表>

PDA Ch2 254nm

| 峰号 | 保留时间  | 面积    | 高度    | 面积%     |
|----|-------|-------|-------|---------|
| 1  | 5.214 | 939   | 160   | 0.958   |
| 2  | 5.531 | 97140 | 14320 | 99.042  |
| 总计 |       | 98079 | 14480 | 100.000 |

<色谱图>

mAU

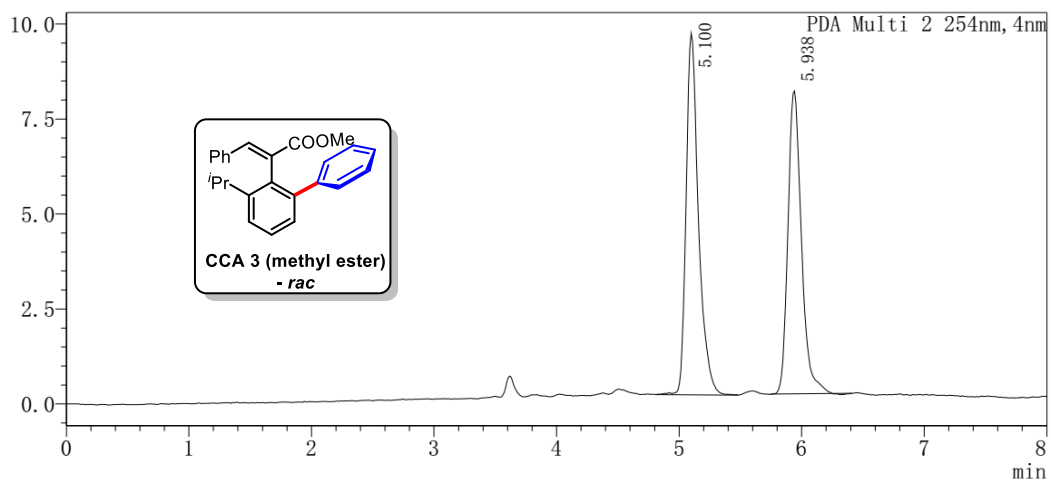

<峰表>

PDA Ch2 254nm

| 峰号 | 保留时间  | 面积     | 高度    | 面积%     |
|----|-------|--------|-------|---------|
| 1  | 5.100 | 66747  | 9511  | 52.189  |
| 2  | 5.938 | 61147  | 7972  | 47.811  |
| 总计 |       | 127894 | 17483 | 100.000 |

<色谱图>

mAU

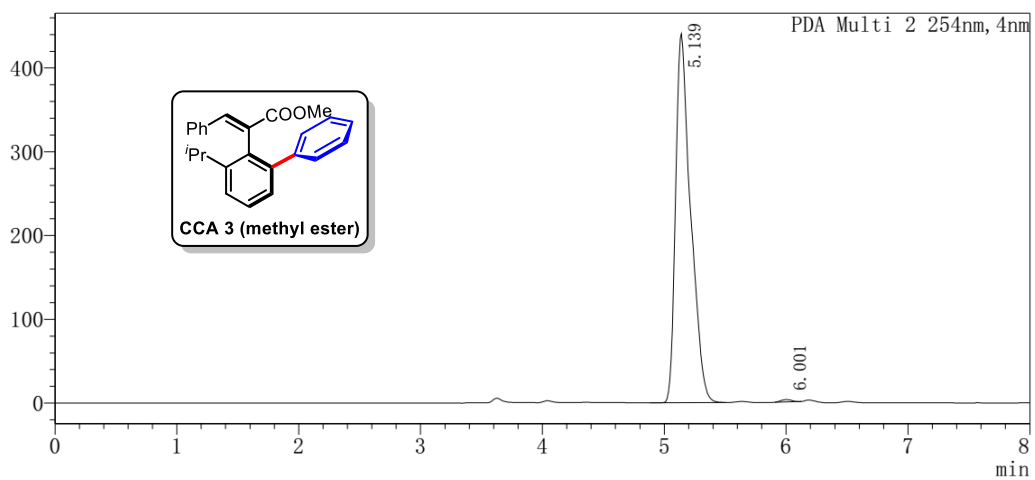

<峰表>

PDA Ch2 254nm

| 峰号 | 保留时间  | 面积      | 高度     | 面积%     |
|----|-------|---------|--------|---------|
| 1  | 5.139 | 3768240 | 440241 | 99.554  |
| 2  | 6.001 | 16891   | 2705   | 0.446   |
| 总计 |       | 3785131 | 442946 | 100.000 |

<色谱图>

mAU

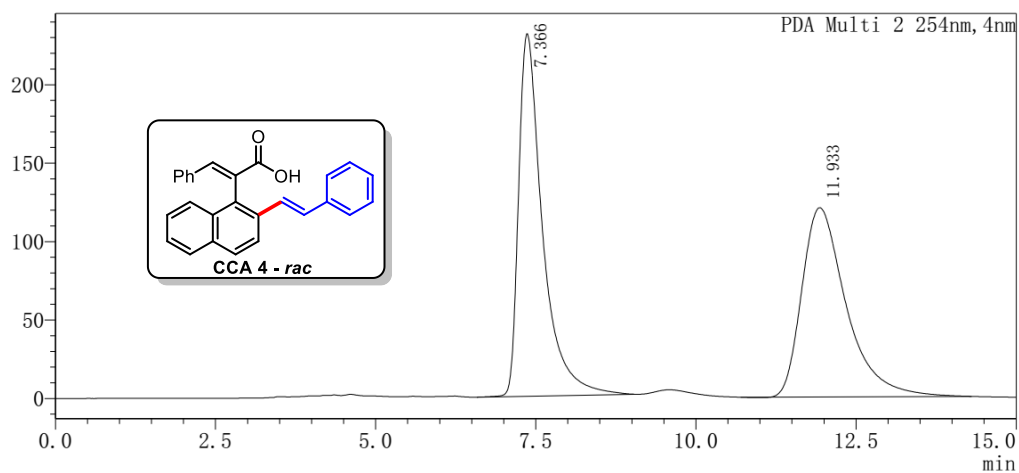

<峰表>

PDA Ch2 254nm

| 峰号 | 保留时间   | 面积       | 高度     | 面积%     |
|----|--------|----------|--------|---------|
| 1  | 7.366  | 6014174  | 230911 | 50.859  |
| 2  | 11.933 | 5811059  | 120630 | 49.141  |
| 总计 |        | 11825233 | 351541 | 100.000 |

<色谱图>

mAU

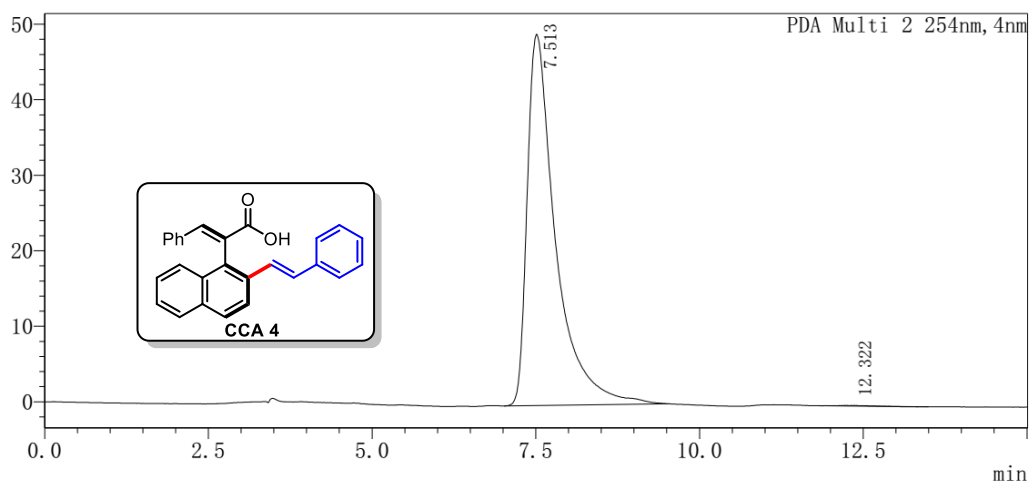

<峰表>

PDA Ch2 254nm

| 峰号 | 保留时间   | 面积      | 高度    | 面积%     |
|----|--------|---------|-------|---------|
| 1  | 7.513  | 1484318 | 49156 | 99.882  |
| 2  | 12.322 | 1757    | 80    | 0.118   |
| 总计 |        | 1486075 | 49236 | 100.000 |

<色谱图>

mAU

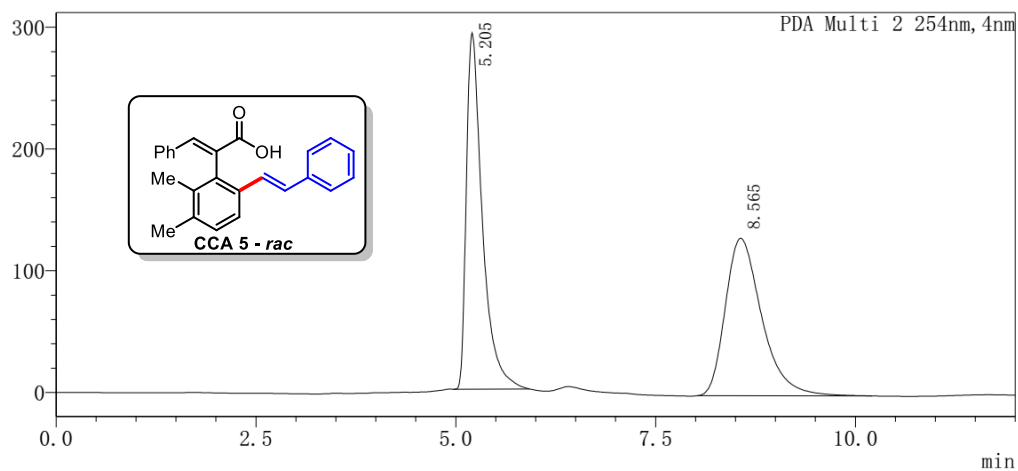

<峰表>

PDA Ch2 254nm

| 峰号 | 保留时间  | 面积      | 高度     | 面积%     |
|----|-------|---------|--------|---------|
| 1  | 5.205 | 4075759 | 292671 | 49.814  |
| 2  | 8.565 | 4106214 | 129364 | 50.186  |
| 总计 |       | 8181973 | 422035 | 100.000 |

<色谱图>

mAU

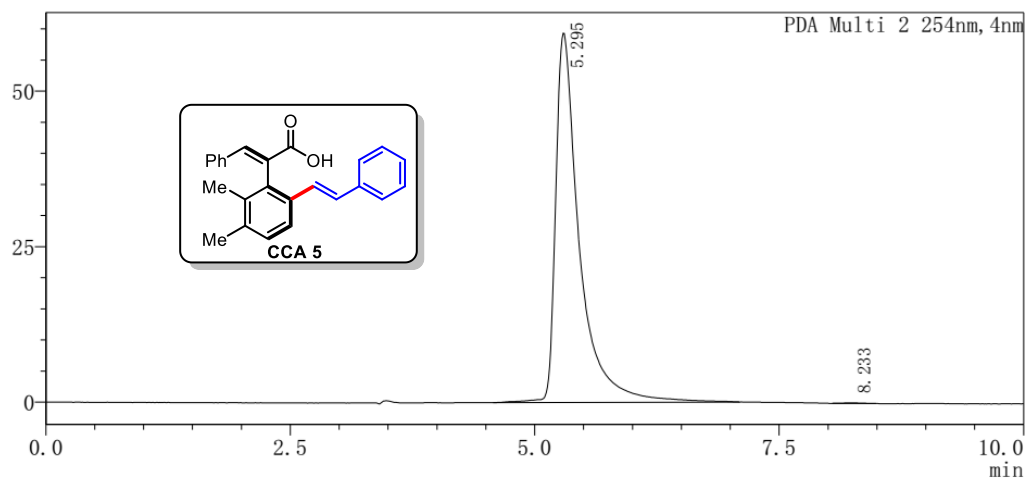

<峰表>

PDA Ch2 254nm

| 峰号 | 保留时间  | 面积      | 高度    | 面积%     |
|----|-------|---------|-------|---------|
| 1  | 5.295 | 1003912 | 59355 | 99.886  |
| 2  | 8.233 | 1145    | 83    | 0.114   |
| 总计 |       | 1005056 | 59438 | 100.000 |

<色谱图>

mAU

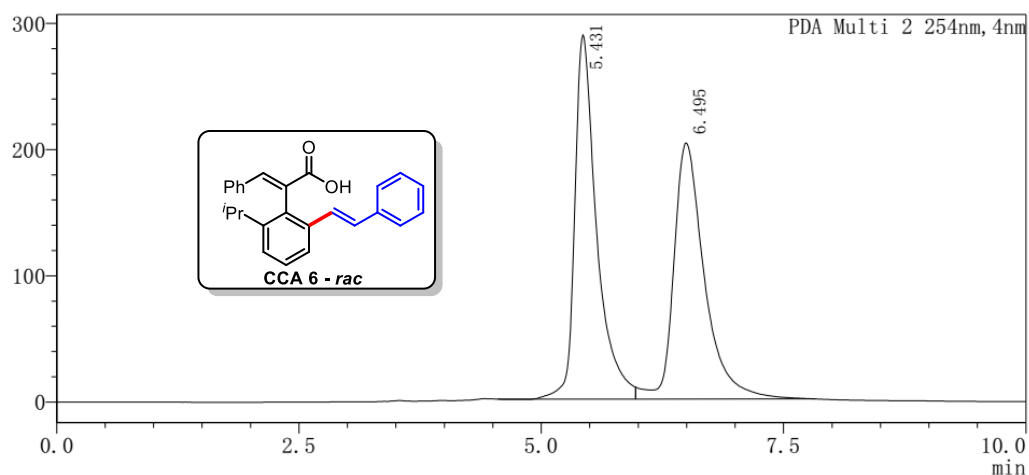

<峰表>

PDA Ch2 254nm

| 峰号 | 保留时间  | 面积      | 高度     | 面积%     |
|----|-------|---------|--------|---------|
| 1  | 5.431 | 4534641 | 288366 | 50.272  |
| 2  | 6.495 | 4485517 | 202982 | 49.728  |
| 总计 |       | 9020158 | 491348 | 100.000 |

<色谱图>

mAU

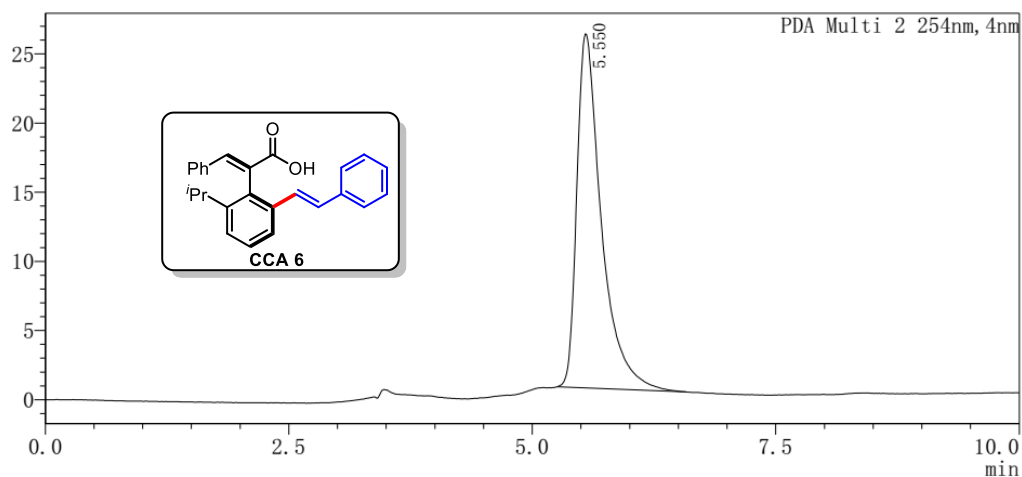

<峰表>

PDA Ch2 254nm

| 峰号 | 保留时间  | 面积     | 高度    | 面积%     |
|----|-------|--------|-------|---------|
| 1  | 5.550 | 448405 | 25583 | 100.000 |
| 总计 |       | 448405 | 25583 | 100.000 |



<色谱图>

mAU

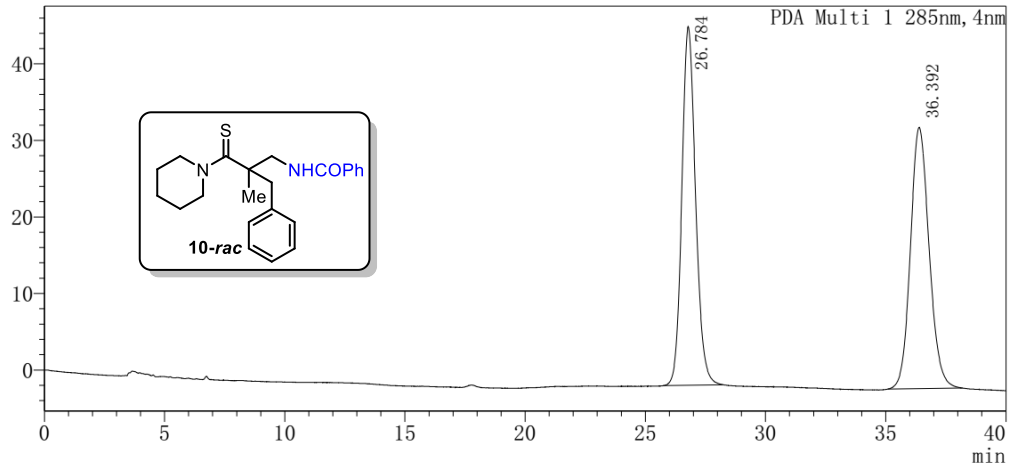

<峰表>

PDA Ch1 285nm

| 峰号 | 保留时间   | 面积      | 高度    | 面积%     |
|----|--------|---------|-------|---------|
| 1  | 26.784 | 1859743 | 46887 | 50.169  |
| 2  | 36.392 | 1847216 | 34160 | 49.831  |
| 总计 |        | 3706959 | 81047 | 100.000 |

<色谱图>

mAU

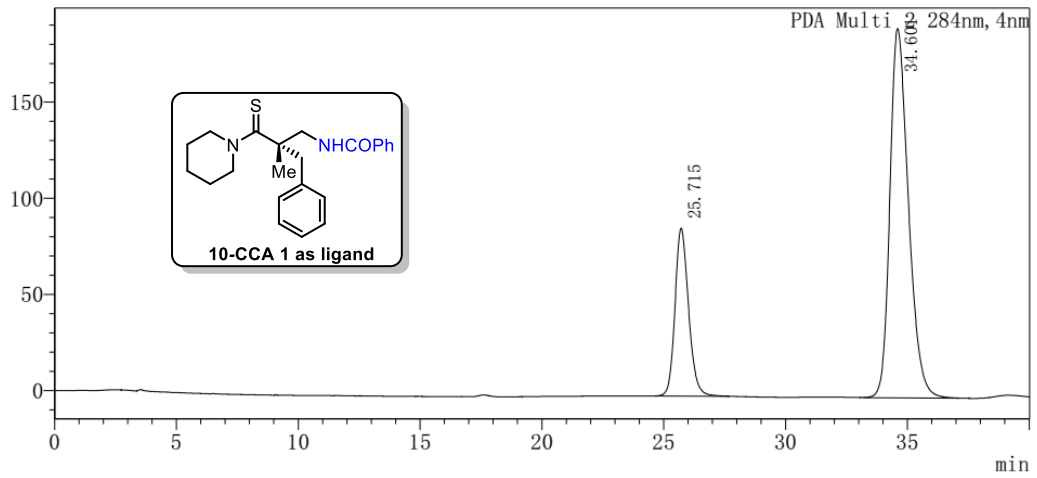

<峰表>

PDA Ch2 284nm

| 峰号 | 保留时间   | 面积       | 高度     | 面积%     |
|----|--------|----------|--------|---------|
| 1  | 25.715 | 3379411  | 87219  | 24.966  |
| 2  | 34.601 | 10156610 | 191793 | 75.034  |
| 总计 |        | 13536021 | 279012 | 100.000 |

<色谱图>

mAU

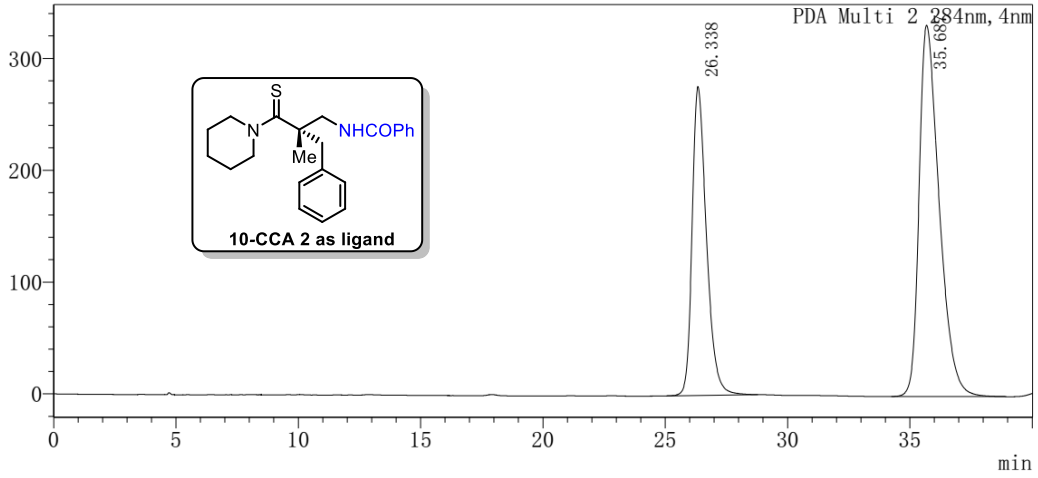

<峰表>

PDA Ch2 284nm

| 峰号 | 保留时间   | 面积       | 高度     | 面积%     |
|----|--------|----------|--------|---------|
| 1  | 26.338 | 11274272 | 276165 | 37.267  |
| 2  | 35.687 | 18978559 | 331880 | 62.733  |
| 总计 |        | 30252831 | 608045 | 100.000 |

<色谱图>

mAU

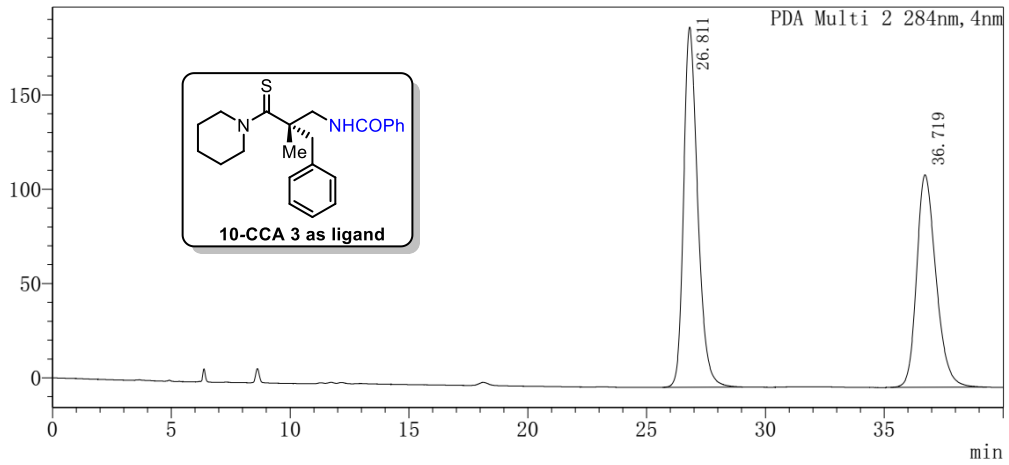

<峰表>

PDA Ch2 284nm

| 峰号 | 保留时间   | 面积       | 高度     | 面积%     |
|----|--------|----------|--------|---------|
| 1  | 26.811 | 7873536  | 190847 | 55.218  |
| 2  | 36.719 | 6385393  | 112719 | 44.782  |
| 总计 |        | 14258929 | 303566 | 100.000 |

<色谱图>

mAU

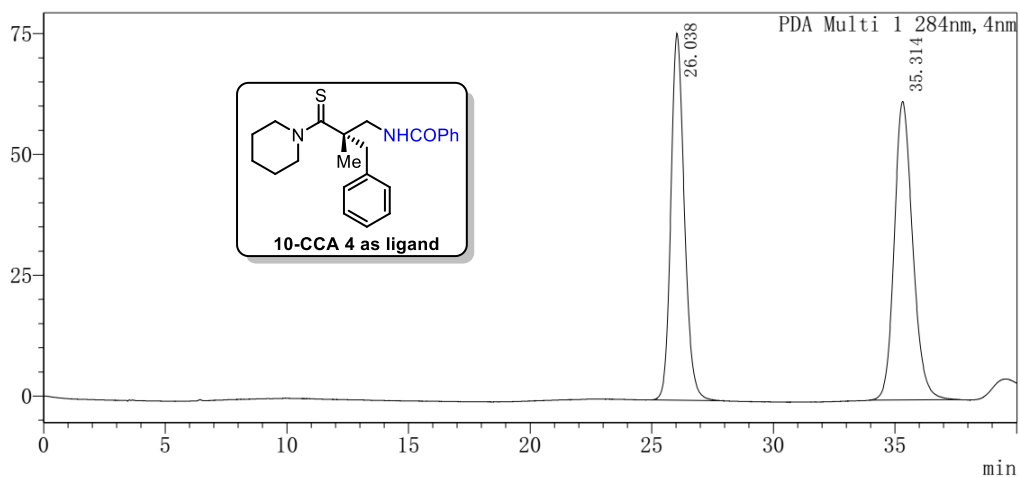

<峰表>

PDA Ch1 284nm

| 峰号 | 保留时间   | 面积      | 高度     | 面积%     |
|----|--------|---------|--------|---------|
| 1  | 26.038 | 2924040 | 75898  | 47.225  |
| 2  | 35.314 | 3267677 | 61810  | 52.775  |
| 总计 |        | 6191716 | 137708 | 100.000 |

<色谱图>

mAU

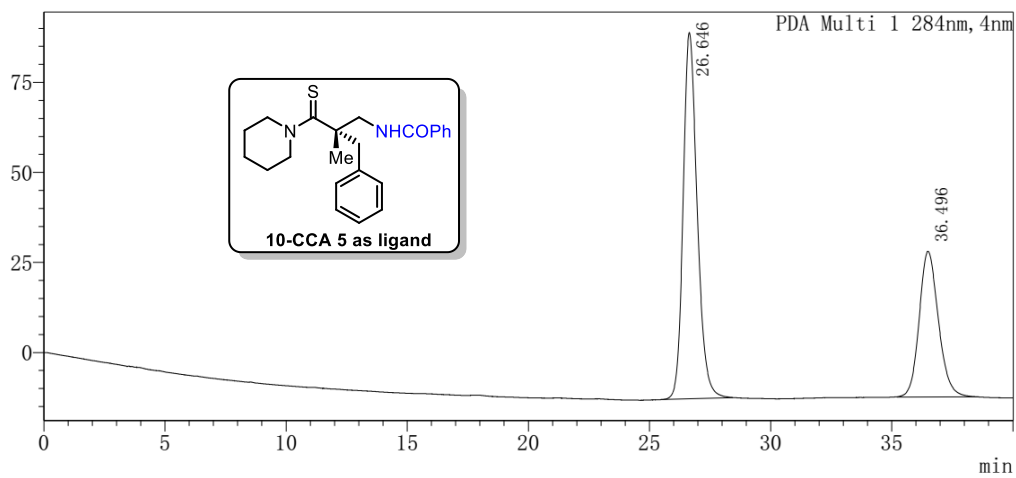

<峰表>

PDA Ch1 284nm

| 峰号 | 保留时间   | 面积      | 高度     | 面积%     |
|----|--------|---------|--------|---------|
| 1  | 26.646 | 4098143 | 101676 | 64.689  |
| 2  | 36.496 | 2237028 | 40489  | 35.311  |
| 总计 |        | 6335171 | 142164 | 100.000 |

<色谱图>

mAU

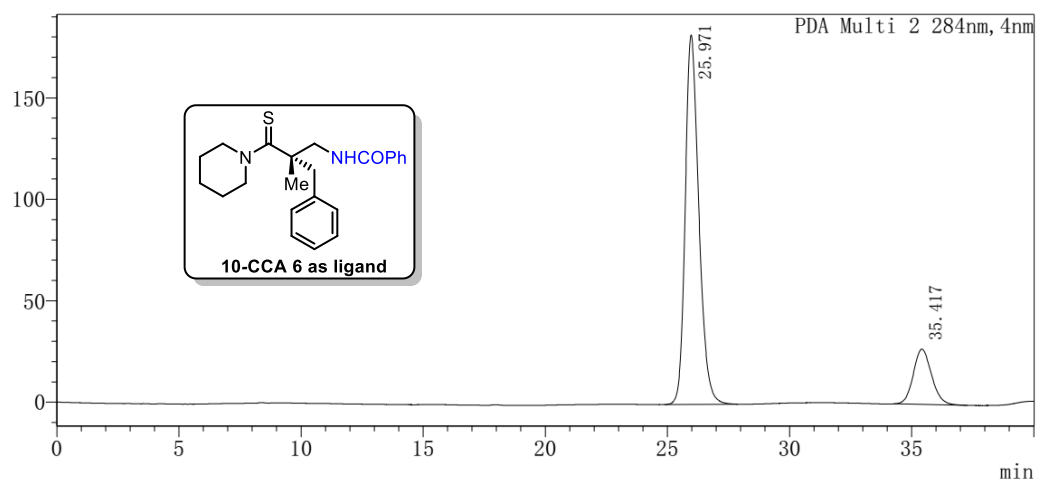

<峰表>

PDA Ch2 284nm

| 峰号 | 保留时间   | 面积      | 高度     | 面积%     |
|----|--------|---------|--------|---------|
| 1  | 25.971 | 7065159 | 182058 | 83.277  |
| 2  | 35.417 | 1418759 | 27268  | 16.723  |
| 总计 |        | 8483919 | 209327 | 100.000 |

<色谱图>

mAU

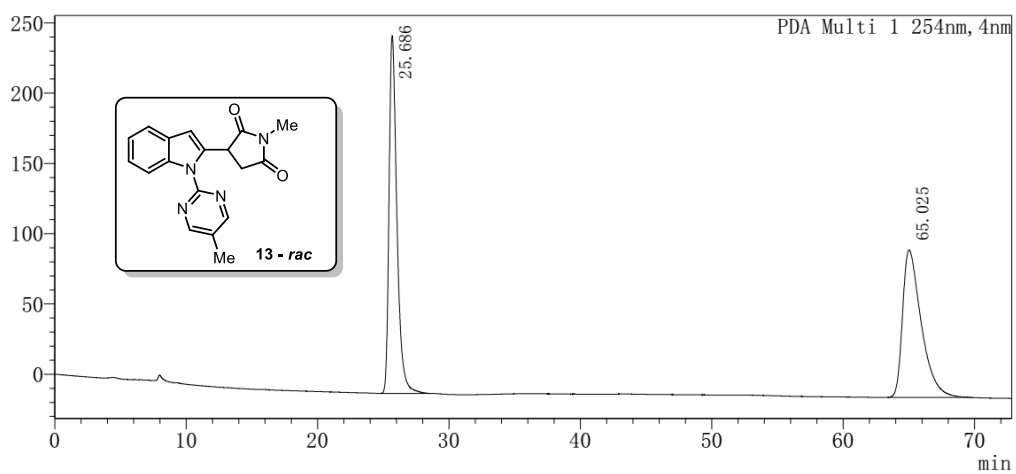

<峰表>

PDA Ch1 254nm

| 峰号 | 保留时间   | 面积       | 高度     | 面积%     |
|----|--------|----------|--------|---------|
| 1  | 25.686 | 10579989 | 254485 | 50.429  |
| 2  | 65.025 | 10400074 | 104906 | 49.571  |
| 总计 |        | 20980063 | 359391 | 100.000 |

<色谱图>

mAU

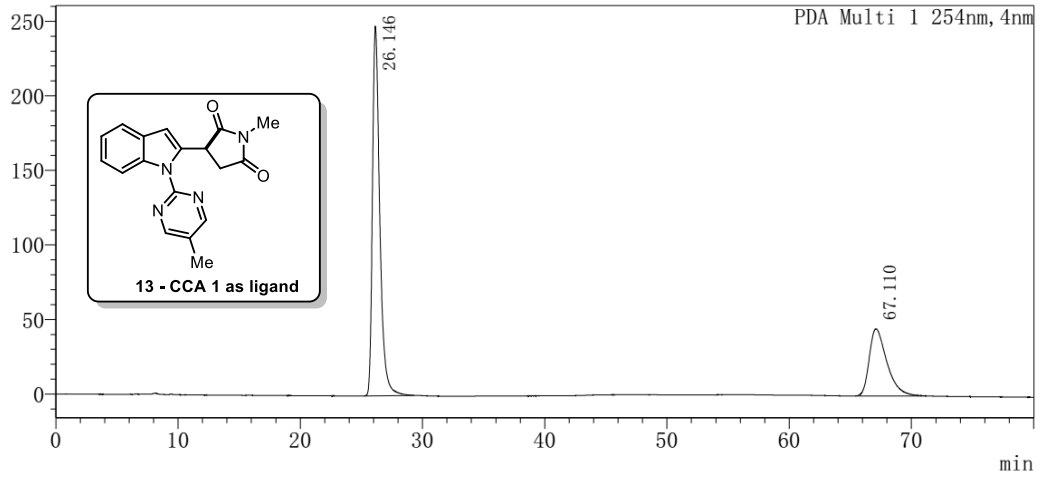

<峰表>

PDA Ch1 254nm

| 峰号 | 保留时间   | 面积       | 高度     | 面积%     |
|----|--------|----------|--------|---------|
| 1  | 26.146 | 10311815 | 247820 | 69.547  |
| 2  | 67.110 | 4515264  | 44966  | 30.453  |
| 总计 |        | 14827079 | 292786 | 100.000 |

<色谱图>

mAU

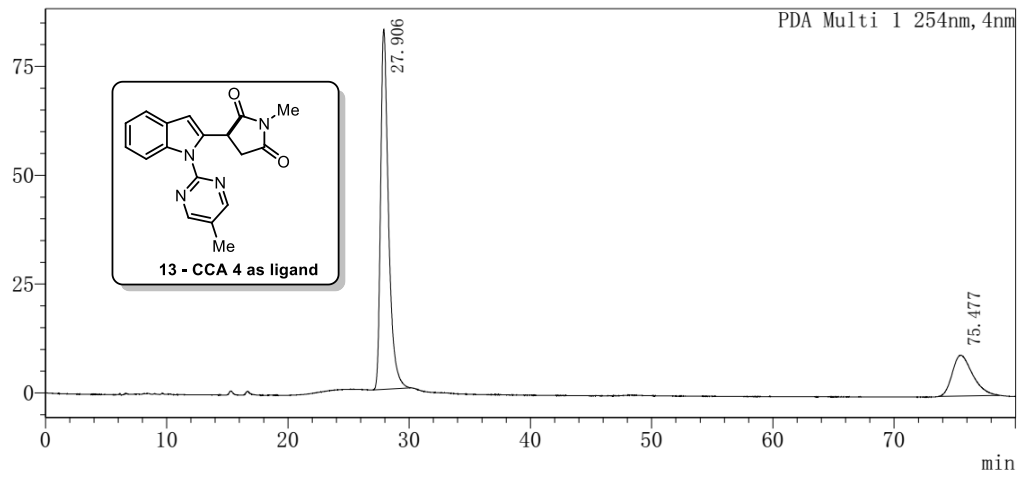

<峰表>

PDA Ch1 254nm

| 峰号 | 保留时间   | 面积      | 高度    | 面积%     |
|----|--------|---------|-------|---------|
| 1  | 27.906 | 3749206 | 82709 | 77.357  |
| 2  | 75.477 | 1097420 | 9389  | 22.643  |
| 总计 |        | 4846625 | 92097 | 100.000 |

<色谱图>

mAU

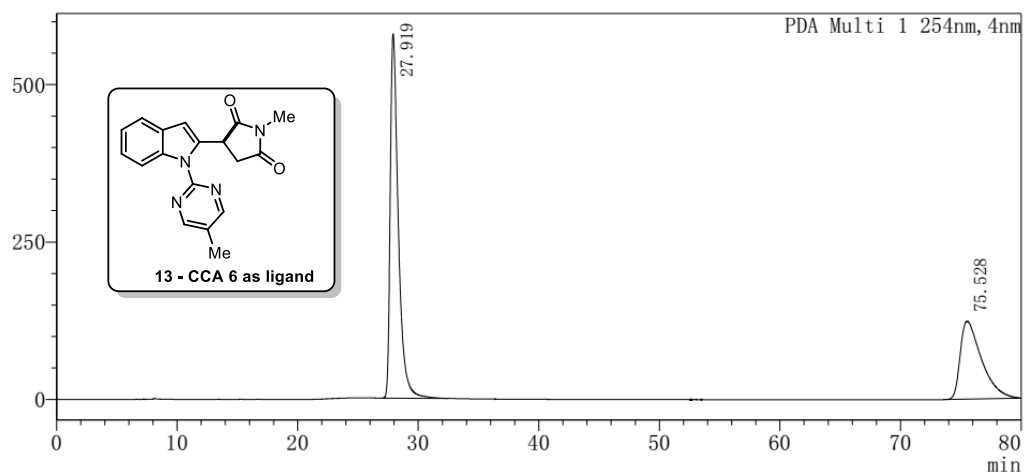

<峰表>

PDA Ch1 254nm

| 峰号 | 保留时间   | 面积       | 高度     | 面积%     |
|----|--------|----------|--------|---------|
| 1  | 27.919 | 27080288 | 578476 | 64.012  |
| 2  | 75.528 | 15224723 | 123744 | 35.988  |
| 总计 |        | 42305011 | 702220 | 100.000 |
